# Supplementary material for: A COL7A1 Variant in a Litter of Neonatal Basset Hounds with Dystrophic Epidermolysis Bullosa
Source: MDPI journal article supplement (doi:10.3390/genes11121458), 2020-12-04
Supplement: s1 [file s1]

## Wildtype allele

**Primer F** →  
 1 gtgggagggc tataggaag aacaattagg atatggggca ttgagggggc aggcaagagc  
 61 catgtcaaca cttctctctg acactagGTC CAGAGTCCAG CCAGACATTG CCCCAGAAT  
 121 CCACGGCCAC AGATATCCTG GGGCTAAGGC CTGGAACCTC CTACCAGGTG GCTGTGTCAG  
 181 CACTGCGAGG GAGAGAGGAG AGTCCCCCTG TGGTCATCGT GGCTCAAACC Ggtcagggtc  
 241 tgacctagct ccttggctgg ctttctccag tggcccttta gaccctatg ctttccctct  
 301 cagactctca ctttgcccca caacagtctc cttcttcaga ttcccatgcc ttctccctca  
 361 gagtctgct ttctcctttg gcctccttt  
 ← **Primer R**

## Mutant allele

**Primer F** →  
 1 gtgggagggc tataggaag aacaattagg atatggggca ttgagggggc aggcaagagc  
 61 catgtcaaca cttctctctg acactagGTC CAGAGTCCAG CCAGACATTG CCCCAGAAT  
 121 CCACGGCCAC AGATATCCTG GGGCTAAGGC CTGGAACCTC CTACCAGGTG GCTGTGTCAG  
 181 CACTGCGAGG GAGAGAGGAG AGTCCCCCAT CGTGGCTCAA ACCGgtcagg gtctgacctg  
 241 gctccttggc tggctttctc cagtggccct ttagaccct GTGTCAGCAC TGCGAGGGAG  
 301 AGAGGAGAGT CCCCATCGT GGCTCAAACC Ggtcagggtc tgacctagct ccttggctgg  
 361 ctttctccag tggcccttta gaccctatg ctttccctct cagactctca ctttgcccca  
 421 caacagtctc cttcttcaga ttcccatgcc ttctccctca gagtctgct ttctcctttg  
 481 gcctccttt  
 ← **Primer R**

**Figure S1.** Genomic sequences of the wildtype and mutant alleles. The sequences correspond to the PCR amplicons used for genotyping the *COL7A1*:[c.2028\_2034del; c.1993\_2050+56dup] variant. The primer sequences are indicated in green. Intronic bases are given in lowercase letters, exonic bases are given in uppercase letters. The duplicated region is highlighted in grey and the 7 bp deletion within the duplicated region is underlined.
