# Supplementary material for: A COL7A1 Variant in a Litter of Neonatal Basset Hounds with Dystrophic Epidermolysis Bullosa
Source: Genes (Basel). 2020 Dec 4;11(12):1458. doi: 10.3390/genes11121458 (PMC7762066; doi:10.3390/genes11121458)
Supplement: Supplementary file 1 [file genes-11-01458-s001.zip]

Archive with 5 entries (5 files):
- FigureS1_sequence.pdf
- FigureS2_EM_Images.pdf
- TableS1_public_genomes.xlsx
- TableS2_candidate_genes.xlsx
- TableS3_private_variants.xlsx
