# Supplementary material for: A COL7A1 Variant in a Litter of Neonatal Basset Hounds with Dystrophic Epidermolysis Bullosa
Source: Genes (Basel). 2020 Dec 4;11(12):1458. doi: 10.3390/genes11121458 (PMC7762066; doi:10.3390/genes11121458)
Supplement: Supplementary file 1 [file genes-11-01458-s001.zip › TableS1_public_genomes.xlsx]

## Sheet: public genomes
Table S1. Accession numbers of 74 dog genome sequences. The affected dog is highlighted in red. The other 73 genome sequences were used as controls in variant filtering.
Sample ID	Breed	Study accession	Sample accession	Remark
20191520	Austrian Black and Tan Hound	PRJEB16012	SAMEA6862978
ACS082	American Cocker Spaniel	PRJEB16012	SAMEA6862930
ACS100	American Cocker Spaniel	PRJEB16012	SAMEA6862931
ACS176	American Cocker Spaniel	PRJEB16012	SAMEA6862932
ACS222	American Cocker Spaniel	PRJEB16012	SAMEA6862933
ACS230	American Cocker Spaniel	PRJEB16012	SAMEA6862934
ACS231	American Cocker Spaniel	PRJEB16012	SAMEA6862935
ACS302	American Cocker Spaniel	PRJEB16012	SAMEA6862936
ACS322	American Cocker Spaniel	PRJEB16012	SAMEA6862937
AU190	Australian Shepherd	PRJEB16012	SAMEA6862957
AU193	Australian Shepherd	PRJEB16012	SAMEA6862979
AU247	Australian Shepherd	PRJEB16012	SAMEA6862929
AU254	Australian Shepherd	PRJEB16012	SAMEA6862980
BF003	Beauceron	PRJEB16012	SAMEA6862928
BH010	Basset Hound	PRJEB16012	SAMEA6862953	affected with dystrophical epidermolysis bullosa (DEB)
BH013	Basset Hound	PRJEB16012	SAMEA6862982
BH014	Basset Hound	PRJEB16012	SAMEA6862983
BH015	Basset Hound	PRJEB16012	SAMEA6862984
BH016	Basset Hound	PRJEB16012	SAMEA6862985
BS2168	Bernese Mountain Dog	PRJEB16012	SAMEA6249477
BS2556	Bernese Mountain Dog	PRJEB16012	SAMEA6862922
BS2557	Bernese Mountain Dog	PRJEB16012	SAMEA6862923
BS2558	Bernese Mountain Dog	PRJEB16012	SAMEA6862924
BS2559	Bernese Mountain Dog	PRJEB16012	SAMEA6862925
BS2560	Bernese Mountain Dog	PRJEB16012	SAMEA6862926
BT001	Miniature Bull Terrier	PRJEB16012	SAMEA6862958
BT002	Bull Terrier	PRJEB16012	SAMEA6862976
BT008	Miniature Bull Terrier	PRJEB16012	SAMEA6862959
BX004	Dogue de Bordeaux	PRJEB16012	SAMEA6862916
BX005	Dogue de Bordeaux	PRJEB16012	SAMEA6862917
BX006	Dogue de Bordeaux	PRJEB16012	SAMEA6862919
BX007	Dogue de Bordeaux	PRJEB16012	SAMEA6862920
BX008	Dogue de Bordeaux	PRJEB16012	SAMEA6862921
CI005	Cane Corso	PRJEB16012	SAMEA6249478
EMC_4	Mixed breed	PRJEB16012	SAMEA6862938
FB081	French Bulldog	PRJEB16012	SAMEA6249479
FB100	French Bulldog	PRJEB16012	SAMEA6862974
FX002	Fox Terrier	PRJEB16012	SAMEA6862971
FX003	Fox Terrier	PRJEB16012	SAMEA6862972
FX004	Fox Terrier	PRJEB16012	SAMEA6862973
GW005	German Wirehaired Pointer	PRJEB16012	SAMEA6862962
GW026	German Wirehaired Pointer	PRJEB16012	SAMEA6862963
GW028	German Wirehaired Pointer	PRJEB16012	SAMEA6862964
GW029	German Wirehaired Pointer	PRJEB16012	SAMEA6862965
GW030	German Wirehaired Pointer	PRJEB16012	SAMEA6862966
GW041	German Wirehaired Pointer	PRJEB16012	SAMEA6862967
GW043	German Wirehaired Pointer	PRJEB16012	SAMEA6862977
GW045	German Wirehaired Pointer	PRJEB16012	SAMEA6862968
GW046	German Wirehaired Pointer	PRJEB16012	SAMEA6862969
GW048	German Wirehaired Pointer	PRJEB16012	SAMEA6862970
H29	Mixed breed	PRJEB16012	SAMEA6862939
H38	Mixed breed	PRJEB16012	SAMEA6862940
H59	Mixed breed	PRJEB16012	SAMEA6862941
HO013	Dutch Shepherd	PRJEB16012	SAMEA6862981
LA2928	Labrador Retriever	PRJEB16012	SAMEA6862915
LH22_M	Mixed breed	PRJEB16012	SAMEA6862942
LR1268	Lagotto Romagnolo	PRJEB16012	SAMEA6862927
LR1278	Lagotto Romagnolo	PRJEB16012	SAMEA6862954
LR1310	Lagotto Romagnolo	PRJEB16012	SAMEA6862975
MI034	Mixed breed	PRJEB16012	SAMEA6862986
MP166	Miniature Poodle	PRJEB16012	SAMEA6862943
MP167	Miniature Poodle	PRJEB16012	SAMEA6862944
MP168	Miniature Poodle	PRJEB16012	SAMEA6862945
MP170	Miniature Poodle	PRJEB16012	SAMEA6862946
PWD_J	Portugese Water Dog	PRJEB16012	SAMEA6862947
SC001	Scottish Terrier	PRJEB16012	SAMEA6862960
SC022	Scottish Terrier	PRJEB16012	SAMEA6862961
SP045	Standard Poodle	PRJEB16012	SAMEA6862948
SP059	Standard Poodle	PRJEB16012	SAMEA6862949
SP060	Standard Poodle	PRJEB16012	SAMEA6862950
TA006	Airedale Terrier	PRJEB16012	SAMEA6862951
TM001	Tamaskan	PRJEB16012	SAMEA6862952
WE012	Weimaraner	PRJEB16012	SAMEA6862955
WE015	Weimaraner	PRJEB16012	SAMEA6862956
