# Supplementary material for: A COL7A1 Variant in a Litter of Neonatal Basset Hounds with Dystrophic Epidermolysis Bullosa
Source: Genes (Basel). 2020 Dec 4;11(12):1458. doi: 10.3390/genes11121458 (PMC7762066; doi:10.3390/genes11121458)
Supplement: Supplementary file 1 [file genes-11-01458-s001.zip › TableS2_candidate_genes.xlsx]

## Sheet: candidate genes
Table S2. Known functional candidate genes for epidermolysis bullosa and other skin fragility disorders in humans [1].
Disorder	Level of Cleavage	Gene	Protein	Inheritance1
Classical Epidermolysis Bullosa (EB)
EB simplex (EBS)	basal epidermal	CD151	CD151 molecule (Raph blood group)	AR
		DST	dystonin	AR
		EXPH5	exophilin 5	AR
		KLHL24	kelch like family member 24	AD
		KRT5	keratin 5	AD, AR
		KRT14	keratin 14	AD, AR
		PLEC	plectin	AR
junctional EB (JEB)	junctional	COL17A1	collagen type XVII, alpha 1 chain	AR
		ITGA3	integrin subunit alpha 3	AR
		ITGA6	integrin subunit alpha 6	AR
		ITGB4	integrin subunit beta 4	AR
		LAMA3	laminin subunit alpha 3	AR
		LAMB3	laminin subunit beta 3	AR
		LAMC2	laminin subunit gamma 2	AR
dystrophic EB (DEB)	dermal	COL7A1	collagen type VII, alpha 1 chain	AD, AR
Kindler EB	mixed	FERMT1	fermitin family homolog 1	AR
Other Disorders with Skin Fragility
peeling skin disorders	intraepidermal	CAST	calpastatin	AR
		CSTA	cystatin A	AR
		CTSB	cystatin B	AR
		DSG1	desmoglein 1	AR
		FLG2	filaggrin family member 2	AR
		SERPINB8	serpin family B member 8	AR
		SPINK5	serine peptidase inhibitor Kazal type 5	AR
erosive skin fragility disorders	intraepidermal	DSC3	desmocollin 3	AR
		DSG3	desmoglein 3	AR
		DSP	desmoplakin	AR
		JUP	junction plakoglobin	AR
		PKP1	plakophilin 1	AR
keratinopathic ichthyoses	intraepidermal	KRT1	keratin 1	AD
		KRT2	keratin 2	AD
		KRT10	keratin 10	AD, AR
pachyonychia congenita	intraepidermal	KRT6A	keratin 6A	AD
		KRT6B	keratin 6B	AD
		KRT6C	keratin 6C	AD
		KRT16	keratin 16	AD
		KRT17	keratin 17	AD
syndromic connective tissue disorder with skin fragility	dermal	PLOD3	procollagen-lysine,2-oxoglutarate 5‑dioxygenase 3	AR
1AD, autosomal dominant; AR, autosomal recessive
