# Supplementary material for: A COL7A1 Variant in a Litter of Neonatal Basset Hounds with Dystrophic Epidermolysis Bullosa
Source: Genes (Basel). 2020 Dec 4;11(12):1458. doi: 10.3390/genes11121458 (PMC7762066; doi:10.3390/genes11121458)
Supplement: Supplementary file 1 [file genes-11-01458-s001.zip › TableS3_private_variants.xlsx]

## Sheet: private homozygous variants
Table S3. Private variants in the sequenced Basset Hound with dystrophical epidermolysis bullosa (DEB). Private variants were obtained by filtering all variants that were present at least once in 73 control genomes. This resulted in 18820 homozygous and 80057 heterozygous private variants for the affected dog. Please note that variants are listed multiple times, if they have predicted effects on …
#CHROM	POS	REF	ALT	FILTER	EFFECT	IMPACT	GENE	GENEID	FEATURE	FEATUREID	BIOTYPE	RANK	HGVS_C	HGVS_P	CDNA_POS	CDNA_LEN	CDS_POS	CDS_LEN	AA_POS	AA_LEN	DISTANCE	ERRORS
1	30903	T	C	PASS	intergenic_region	MODIFIER	CHR_START-ENPP1	CHR_START-100856150	intergenic_region	CHR_START-100856150		-1	n.30903T>C		-1	-1	-1	-1	-1	-1	0
1	828518	A	ACTCCCCCCTTCCGCCCCCACCCCACCTCCTCCGACCCCCGCCCCATCTCCATCCCTTCCCCCACCCCCACGTGGT	PASS	intron_variant	MODIFIER	KCNG2	607004	transcript	XM_022426692.1	protein_coding	6	c.456+283_456+284insACCACGTGGGGGTGGGGGAAGGGATGGAGATGGGGCGGGGGTCGGAGGAGGTGGGGTGGGGGCGGAAGGGGGGAG		-1	-1	-1	-1	-1	-1	0
1	7096312	GAAGGAAGGAAGGAAGGAAGGAAGGAAGAAAGA	G	PASS	upstream_gene_variant	MODIFIER	LOC111090576	111090576	transcript	XR_002615209.1	pseudogene	-1	n.-2140_-2109delAAGGAAGGAAGGAAGGAAGGAAGGAAGAAAGA		-1	-1	-1	-1	-1	-1	2140
1	7096312	GAAGGAAGGAAGGAAGGAAGGAAGGAAGAAAGA	G	PASS	upstream_gene_variant	MODIFIER	LOC111090576	111090576	transcript	XR_002615214.1	pseudogene	-1	n.-2139_-2108delAAGGAAGGAAGGAAGGAAGGAAGGAAGAAAGA		-1	-1	-1	-1	-1	-1	2139
1	7096312	GAAGGAAGGAAGGAAGGAAGGAAGGAAGAAAGA	G	PASS	intergenic_region	MODIFIER	LOC111090553-LOC111090576	111090553-111090576	intergenic_region	111090553-111090576		-1	n.7096313_7096344delAAGGAAGGAAGGAAGGAAGGAAGGAAGAAAGA		-1	-1	-1	-1	-1	-1	0
1	18557047	C	G	PASS	intron_variant	MODIFIER	ST8SIA3	612940	transcript	XM_847888.5	protein_coding	1	c.209+584G>C		-1	-1	-1	-1	-1	-1	0
1	21697879	T	G	PASS	intergenic_region	MODIFIER	LOC102154621-DCC	102154621-483976	intergenic_region	102154621-483976		-1	n.21697879T>G		-1	-1	-1	-1	-1	-1	0
1	26134968	C	T	PASS	intergenic_region	MODIFIER	LOC111095280-EYA4	111095280-483991	intergenic_region	111095280-483991		-1	n.26134968C>T		-1	-1	-1	-1	-1	-1	0
1	40224395	GAAA	G	PASS	intergenic_region	MODIFIER	TAB2-ZC3H12D	484028-484029	intergenic_region	484028-484029		-1	n.40224396_40224398delAAA		-1	-1	-1	-1	-1	-1	0
1	45712643	C	T	PASS	intergenic_region	MODIFIER	LOC111090678-LOC111095850	111090678-111095850	intergenic_region	111090678-111095850		-1	n.45712643C>T		-1	-1	-1	-1	-1	-1	0
1	52473724	C	G	PASS	intergenic_region	MODIFIER	LOC106559668-LOC111090691	106559668-111090691	intergenic_region	106559668-111090691		-1	n.52473724C>G		-1	-1	-1	-1	-1	-1	0
1	53886042	A	AAAAAAAT	PASS	intron_variant	MODIFIER	PDE10A	484073	transcript	XM_014113092.2	protein_coding	1	c.110-84077_110-84076insATTTTTT		-1	-1	-1	-1	-1	-1	0
1	53886042	A	AAAAAAAT	PASS	intron_variant	MODIFIER	PDE10A	484073	transcript	XM_005615565.3	protein_coding	1	c.-86-84077_-86-84076insATTTTTT		-1	-1	-1	-1	-1	-1	0
1	54234130	G	A	PASS	intergenic_region	MODIFIER	T-LOC111095958	403653-111095958	intergenic_region	403653-111095958		-1	n.54234130G>A		-1	-1	-1	-1	-1	-1	0
1	56562245	C	T	PASS	intergenic_region	MODIFIER	LOC102153803-WDR27	102153803-612528	intergenic_region	102153803-612528		-1	n.56562245C>T		-1	-1	-1	-1	-1	-1	0
1	56971127	C	G	PASS	upstream_gene_variant	MODIFIER	CALHM4	102155016	transcript	XM_850264.4	protein_coding	-1	c.-1909C>G		-1	-1	-1	-1	-1	-1	1029
1	56971127	C	G	PASS	upstream_gene_variant	MODIFIER	CALHM4	102155016	transcript	XM_005615582.2	protein_coding	-1	c.-6536C>G		-1	-1	-1	-1	-1	-1	2368
1	56971127	C	G	PASS	intron_variant	MODIFIER	TRAPPC3L	612533	transcript	XM_014113258.2	protein_coding	3	c.-155-12665G>C		-1	-1	-1	-1	-1	-1	0
1	56971127	C	G	PASS	intron_variant	MODIFIER	TRAPPC3L	612533	transcript	XM_005615585.2	protein_coding	2	c.-198-12665G>C		-1	-1	-1	-1	-1	-1	0
1	56971127	C	G	PASS	intron_variant	MODIFIER	TRAPPC3L	612533	transcript	XM_022419295.1	protein_coding	3	c.-155-12665G>C		-1	-1	-1	-1	-1	-1	0
1	56971127	C	G	PASS	intron_variant	MODIFIER	TRAPPC3L	612533	transcript	XM_022419302.1	protein_coding	2	c.-155-12665G>C		-1	-1	-1	-1	-1	-1	0
1	56971127	C	G	PASS	intron_variant	MODIFIER	TRAPPC3L	612533	transcript	XM_014113261.2	protein_coding	2	c.-155-12665G>C		-1	-1	-1	-1	-1	-1	0
1	56971127	C	G	PASS	intron_variant	MODIFIER	CALHM4	102155016	transcript	XM_022419274.1	protein_coding	4	c.78-2067C>G		-1	-1	-1	-1	-1	-1	0
1	56971127	C	G	PASS	intron_variant	MODIFIER	CALHM4	102155016	transcript	XM_022419276.1	protein_coding	5	c.1-6536C>G		-1	-1	-1	-1	-1	-1	0
1	56971127	C	G	PASS	intron_variant	MODIFIER	CALHM4	102155016	transcript	XM_022419279.1	protein_coding	4	c.1-6536C>G		-1	-1	-1	-1	-1	-1	0
1	57831791	T	TTCCCTCCC	PASS	upstream_gene_variant	MODIFIER	GOPC	484100	transcript	XM_541217.6	protein_coding	-1	c.-2972_-2971insGGGAGGGA		-1	-1	-1	-1	-1	-1	2770
1	57831791	T	TTCCCTCCC	PASS	intergenic_region	MODIFIER	GOPC-NEPN	484100-484101	intergenic_region	484100-484101		-1	n.57831791_57831792insTCCCTCCC		-1	-1	-1	-1	-1	-1	0
1	61559034	AAAGAAAG	A	PASS	intergenic_region	MODIFIER	LOC106558802-LOC111096196	106558802-111096196	intergenic_region	106558802-111096196		-1	n.61559035_61559041delAAGAAAG		-1	-1	-1	-1	-1	-1	0
1	68312046	C	CA	PASS	upstream_gene_variant	MODIFIER	LOC111090714	111090714	transcript	XR_002615521.1	pseudogene	-1	n.-1742_-1741insA		-1	-1	-1	-1	-1	-1	1741
1	68312046	C	CA	PASS	intergenic_region	MODIFIER	LOC111090713-LOC111090714	111090713-111090714	intergenic_region	111090713-111090714		-1	n.68312046_68312047insA		-1	-1	-1	-1	-1	-1	0
1	68312051	C	CA	PASS	upstream_gene_variant	MODIFIER	LOC111090714	111090714	transcript	XR_002615521.1	pseudogene	-1	n.-1737_-1736insA		-1	-1	-1	-1	-1	-1	1736
1	68312051	C	CA	PASS	intergenic_region	MODIFIER	LOC111090713-LOC111090714	111090713-111090714	intergenic_region	111090713-111090714		-1	n.68312051_68312052insA		-1	-1	-1	-1	-1	-1	0
1	68312054	CTT	C	PASS	upstream_gene_variant	MODIFIER	LOC111090714	111090714	transcript	XR_002615521.1	pseudogene	-1	n.-1733_-1732delTT		-1	-1	-1	-1	-1	-1	1733
1	68312054	CTT	C	PASS	intergenic_region	MODIFIER	LOC111090713-LOC111090714	111090713-111090714	intergenic_region	111090713-111090714		-1	n.68312055_68312056delTT		-1	-1	-1	-1	-1	-1	0
1	68312060	C	CCCCCGGGGG	PASS	upstream_gene_variant	MODIFIER	LOC111090714	111090714	transcript	XR_002615521.1	pseudogene	-1	n.-1728_-1727insCCCCGGGGG		-1	-1	-1	-1	-1	-1	1727
1	68312060	C	CCCCCGGGGG	PASS	intergenic_region	MODIFIER	LOC111090713-LOC111090714	111090713-111090714	intergenic_region	111090713-111090714		-1	n.68312060_68312061insCCCCGGGGG		-1	-1	-1	-1	-1	-1	0
1	68312061	A	AGGCTCTGAGCCCCCCCAGAGTCAGCC	PASS	upstream_gene_variant	MODIFIER	LOC111090714	111090714	transcript	XR_002615521.1	pseudogene	-1	n.-1727_-1726insGGCTCTGAGCCCCCCCAGAGTCAGCC		-1	-1	-1	-1	-1	-1	1726
1	68312061	A	AGGCTCTGAGCCCCCCCAGAGTCAGCC	PASS	intergenic_region	MODIFIER	LOC111090713-LOC111090714	111090713-111090714	intergenic_region	111090713-111090714		-1	n.68312061_68312062insGGCTCTGAGCCCCCCCAGAGTCAGCC		-1	-1	-1	-1	-1	-1	0
1	75648197	C	T	PASS	downstream_gene_variant	MODIFIER	LOC100686720	100686720	transcript	100686720	pseudogene	-1	n.*3371C>T		-1	-1	-1	-1	-1	-1	3371
1	75648197	C	T	PASS	intergenic_region	MODIFIER	LOC100686720-GKAP1	100686720-476311	intergenic_region	100686720-476311		-1	n.75648197C>T		-1	-1	-1	-1	-1	-1	0
1	75648198	T	C	PASS	downstream_gene_variant	MODIFIER	LOC100686720	100686720	transcript	100686720	pseudogene	-1	n.*3372T>C		-1	-1	-1	-1	-1	-1	3372
1	75648198	T	C	PASS	intergenic_region	MODIFIER	LOC100686720-GKAP1	100686720-476311	intergenic_region	100686720-476311		-1	n.75648198T>C		-1	-1	-1	-1	-1	-1	0
1	82287340	C	CAAAAA	PASS	intron_variant	MODIFIER	PCSK5	484160	transcript	XM_022427203.1	protein_coding	12	c.1611-4455_1611-4454insTTTTT		-1	-1	-1	-1	-1	-1	0
1	85364310	A	C	PASS	intron_variant	MODIFIER	LOC102153097	102153097	transcript	XR_001317177.2	pseudogene	1	n.2244-20185T>G		-1	-1	-1	-1	-1	-1	0
1	90959620	G	A	PASS	intergenic_region	MODIFIER	SMARCA2-LOC100686886	476335-100686886	intergenic_region	476335-100686886		-1	n.90959620G>A		-1	-1	-1	-1	-1	-1	0
1	94730808	AGCAAGGCTGTTCCAAGCCTCTTCATGTATCACGTTGGCCAGCATTCCACTGACC	A	PASS	intergenic_region	MODIFIER	LOC609770-LOC111096995	609770-111096995	intergenic_region	609770-111096995		-1	n.94730809_94730862delGCAAGGCTGTTCCAAGCCTCTTCATGTATCACGTTGGCCAGCATTCCACTGACC		-1	-1	-1	-1	-1	-1	0
1	94730865	AGCAAATCTCATGGCCTTAATC	A	PASS	intergenic_region	MODIFIER	LOC609770-LOC111096995	609770-111096995	intergenic_region	609770-111096995		-1	n.94730866_94730886delGCAAATCTCATGGCCTTAATC		-1	-1	-1	-1	-1	-1	0
1	96931725	GGGGGA	G	PASS	upstream_gene_variant	MODIFIER	SECISBP2	476351	transcript	XM_022422095.1	protein_coding	-1	c.-4747_-4743delTCCCC		-1	-1	-1	-1	-1	-1	4453
1	96931725	GGGGGA	G	PASS	upstream_gene_variant	MODIFIER	LOC111097076	111097076	transcript	XR_002629220.1	pseudogene	-1	n.-1564_-1560delGGGGA		-1	-1	-1	-1	-1	-1	1564
1	96931725	GGGGGA	G	PASS	upstream_gene_variant	MODIFIER	SECISBP2	476351	transcript	XM_014117988.2	protein_coding	-1	c.-9555_-9551delTCCCC		-1	-1	-1	-1	-1	-1	4504
1	96931725	GGGGGA	G	PASS	upstream_gene_variant	MODIFIER	SECISBP2	476351	transcript	XM_014117979.2	protein_coding	-1	c.-4747_-4743delTCCCC		-1	-1	-1	-1	-1	-1	4453
1	96931725	GGGGGA	G	PASS	upstream_gene_variant	MODIFIER	SECISBP2	476351	transcript	XM_014117983.2	protein_coding	-1	c.-4747_-4743delTCCCC		-1	-1	-1	-1	-1	-1	4453
1	96931725	GGGGGA	G	PASS	upstream_gene_variant	MODIFIER	SECISBP2	476351	transcript	XM_014117987.2	protein_coding	-1	c.-4747_-4743delTCCCC		-1	-1	-1	-1	-1	-1	4453
1	96931725	GGGGGA	G	PASS	upstream_gene_variant	MODIFIER	SECISBP2	476351	transcript	XM_022422099.1	protein_coding	-1	c.-4747_-4743delTCCCC		-1	-1	-1	-1	-1	-1	4453
1	96931725	GGGGGA	G	PASS	upstream_gene_variant	MODIFIER	SECISBP2	476351	transcript	XM_014117982.1	protein_coding	-1	c.-4251_-4247delTCCCC		-1	-1	-1	-1	-1	-1	4143
1	96931725	GGGGGA	G	PASS	upstream_gene_variant	MODIFIER	SECISBP2	476351	transcript	XM_022422105.1	protein_coding	-1	c.-4251_-4247delTCCCC		-1	-1	-1	-1	-1	-1	4143
1	96931725	GGGGGA	G	PASS	intron_variant	MODIFIER	CKS2	100686141	transcript	XM_003432656.4	protein_coding	2	c.59+1148_59+1152delTCCCC		-1	-1	-1	-1	-1	-1	0
1	97962897	T	TTTTTTTTTTAATGATTTTTTTTTAATTTTTATTTATTC	PASS	upstream_gene_variant	MODIFIER	PTPDC1	476357	transcript	XM_005615980.3	protein_coding	-1	c.-4139_-4138insGAATAAATAAAAATTAAAAAAAAATCATTAAAAAAAAA		-1	-1	-1	-1	-1	-1	4066
1	97962897	T	TTTTTTTTTTAATGATTTTTTTTTAATTTTTATTTATTC	PASS	upstream_gene_variant	MODIFIER	PTPDC1	476357	transcript	XM_533558.6	protein_coding	-1	c.-4139_-4138insGAATAAATAAAAATTAAAAAAAAATCATTAAAAAAAAA		-1	-1	-1	-1	-1	-1	4066
1	97962897	T	TTTTTTTTTTAATGATTTTTTTTTAATTTTTATTTATTC	PASS	upstream_gene_variant	MODIFIER	PTPDC1	476357	transcript	XR_001317372.2	pseudogene	-1	n.-4065_-4064insGAATAAATAAAAATTAAAAAAAAATCATTAAAAAAAAA		-1	-1	-1	-1	-1	-1	4065
1	97962897	T	TTTTTTTTTTAATGATTTTTTTTTAATTTTTATTTATTC	PASS	upstream_gene_variant	MODIFIER	PTPDC1	476357	transcript	XR_291364.3	pseudogene	-1	n.-4065_-4064insGAATAAATAAAAATTAAAAAAAAATCATTAAAAAAAAA		-1	-1	-1	-1	-1	-1	4065
1	97962897	T	TTTTTTTTTTAATGATTTTTTTTTAATTTTTATTTATTC	PASS	intron_variant	MODIFIER	PTPDC1	476357	transcript	XM_003432671.4	protein_coding	2	c.82+4443_82+4444insGAATAAATAAAAATTAAAAAAAAATCATTAAAAAAAAA		-1	-1	-1	-1	-1	-1	0
1	97962897	T	TTTTTTTTTTAATGATTTTTTTTTAATTTTTATTTATTC	PASS	intron_variant	MODIFIER	PTPDC1	476357	transcript	XM_005615982.3	protein_coding	2	c.82+4443_82+4444insGAATAAATAAAAATTAAAAAAAAATCATTAAAAAAAAA		-1	-1	-1	-1	-1	-1	0
1	101243034	T	G	PASS	intergenic_region	MODIFIER	LOC100687467-LOC102154596	100687467-102154596	intergenic_region	100687467-102154596		-1	n.101243034T>G		-1	-1	-1	-1	-1	-1	0
1	102563721	A	C	PASS	intergenic_region	MODIFIER	RDH13-GP6	611373-484303	intergenic_region	611373-484303		-1	n.102563721A>C		-1	-1	-1	-1	-1	-1	0
1	104510238	G	A	PASS	intergenic_region	MODIFIER	LOC102151412-LOC482273	102151412-482273	intergenic_region	102151412-482273		-1	n.104510238G>A		-1	-1	-1	-1	-1	-1	0
1	104689139	G	GA	PASS	upstream_gene_variant	MODIFIER	LOC476394	476394	transcript	XM_022427912.1	protein_coding	-1	c.-6245_-6244insT		-1	-1	-1	-1	-1	-1	703
1	104689139	G	GA	PASS	downstream_gene_variant	MODIFIER	LOC111089988	111089988	transcript	XM_022427844.1	protein_coding	-1	c.*5379_*5380insT		-1	-1	-1	-1	-1	-1	3409
1	104689139	G	GA	PASS	intergenic_region	MODIFIER	LOC476394-LOC111089988	476394-111089988	intergenic_region	476394-111089988		-1	n.104689139_104689140insA		-1	-1	-1	-1	-1	-1	0
1	107562655	G	GGATTC	PASS	intergenic_region	MODIFIER	BCAT2-FGF21	484394-484395	intergenic_region	484394-484395		-1	n.107562655_107562656insGATTC		-1	-1	-1	-1	-1	-1	0
1	109658064	CT	C	PASS	intron_variant	MODIFIER	NOVA2	612213	transcript	XM_014116591.2	protein_coding	1	c.276+97delT		-1	-1	-1	-1	-1	-1	0
1	109658078	A	C	PASS	intron_variant	MODIFIER	NOVA2	612213	transcript	XM_014116591.2	protein_coding	1	c.276+110A>C		-1	-1	-1	-1	-1	-1	0
1	121644608	AAGG	A	PASS	upstream_gene_variant	MODIFIER	LOC102153234	102153234	transcript	XR_002632216.1	pseudogene	-1	n.-3968_-3966delCCT		-1	-1	-1	-1	-1	-1	3966
1	121644608	AAGG	A	PASS	upstream_gene_variant	MODIFIER	LOC111098421	111098421	transcript	XR_002632217.1	pseudogene	-1	n.-894_-892delAGG		-1	-1	-1	-1	-1	-1	894
1	121644608	AAGG	A	PASS	upstream_gene_variant	MODIFIER	LOC102153234	102153234	transcript	XR_291472.2	pseudogene	-1	n.-76_-74delCCT		-1	-1	-1	-1	-1	-1	74
1	121644608	AAGG	A	PASS	intergenic_region	MODIFIER	LOC102153234-LOC111098421	102153234-111098421	intergenic_region	102153234-111098421		-1	n.121644609_121644611delAGG		-1	-1	-1	-1	-1	-1	0
1	121644614	C	CGG	PASS	upstream_gene_variant	MODIFIER	LOC102153234	102153234	transcript	XR_002632216.1	pseudogene	-1	n.-3972_-3971insCC		-1	-1	-1	-1	-1	-1	3972
1	121644614	C	CGG	PASS	upstream_gene_variant	MODIFIER	LOC111098421	111098421	transcript	XR_002632217.1	pseudogene	-1	n.-889_-888insGG		-1	-1	-1	-1	-1	-1	888
1	121644614	C	CGG	PASS	upstream_gene_variant	MODIFIER	LOC102153234	102153234	transcript	XR_291472.2	pseudogene	-1	n.-80_-79insCC		-1	-1	-1	-1	-1	-1	80
1	121644614	C	CGG	PASS	intergenic_region	MODIFIER	LOC102153234-LOC111098421	102153234-111098421	intergenic_region	102153234-111098421		-1	n.121644614_121644615insGG		-1	-1	-1	-1	-1	-1	0
1	121644618	A	G	PASS	upstream_gene_variant	MODIFIER	LOC102153234	102153234	transcript	XR_002632216.1	pseudogene	-1	n.-3975T>C		-1	-1	-1	-1	-1	-1	3975
1	121644618	A	G	PASS	upstream_gene_variant	MODIFIER	LOC111098421	111098421	transcript	XR_002632217.1	pseudogene	-1	n.-885A>G		-1	-1	-1	-1	-1	-1	885
1	121644618	A	G	PASS	upstream_gene_variant	MODIFIER	LOC102153234	102153234	transcript	XR_291472.2	pseudogene	-1	n.-83T>C		-1	-1	-1	-1	-1	-1	83
1	121644618	A	G	PASS	intergenic_region	MODIFIER	LOC102153234-LOC111098421	102153234-111098421	intergenic_region	102153234-111098421		-1	n.121644618A>G		-1	-1	-1	-1	-1	-1	0
1	121644619	T	A	PASS	upstream_gene_variant	MODIFIER	LOC102153234	102153234	transcript	XR_002632216.1	pseudogene	-1	n.-3976A>T		-1	-1	-1	-1	-1	-1	3976
1	121644619	T	A	PASS	upstream_gene_variant	MODIFIER	LOC111098421	111098421	transcript	XR_002632217.1	pseudogene	-1	n.-884T>A		-1	-1	-1	-1	-1	-1	884
1	121644619	T	A	PASS	upstream_gene_variant	MODIFIER	LOC102153234	102153234	transcript	XR_291472.2	pseudogene	-1	n.-84A>T		-1	-1	-1	-1	-1	-1	84
1	121644619	T	A	PASS	intergenic_region	MODIFIER	LOC102153234-LOC111098421	102153234-111098421	intergenic_region	102153234-111098421		-1	n.121644619T>A		-1	-1	-1	-1	-1	-1	0
2	80936	G	T	PASS	intergenic_region	MODIFIER	LOC100687763-LOC100856010	100687763-100856010	intergenic_region	100687763-100856010		-1	n.80936G>T		-1	-1	-1	-1	-1	-1	0
2	696822	G	GGGTGGTGGAAGGGGAGGT	PASS	intergenic_region	MODIFIER	LOC100683275-LOC100683355	100683275-100683355	intergenic_region	100683275-100683355		-1	n.696822_696823insGGTGGTGGAAGGGGAGGT		-1	-1	-1	-1	-1	-1	0
2	1915578	TTATATATATATATATATATATATATATATA	T	PASS	intron_variant	MODIFIER	CUL2	477952	transcript	XM_005616937.3	protein_coding	3	c.119+942_119+971delTATATATATATATATATATATATATATATA		-1	-1	-1	-1	-1	-1	0
2	1915578	TTATATATATATATATATATATATATATATA	T	PASS	intron_variant	MODIFIER	CUL2	477952	transcript	XM_022406087.1	protein_coding	3	c.119+942_119+971delTATATATATATATATATATATATATATATA		-1	-1	-1	-1	-1	-1	0
2	1915578	TTATATATATATATATATATATATATATATA	T	PASS	intron_variant	MODIFIER	CUL2	477952	transcript	XM_005616938.3	protein_coding	4	c.119+942_119+971delTATATATATATATATATATATATATATATA		-1	-1	-1	-1	-1	-1	0
2	1915578	TTATATATATATATATATATATATATATATA	T	PASS	intron_variant	MODIFIER	CUL2	477952	transcript	XM_535140.6	protein_coding	3	c.119+942_119+971delTATATATATATATATATATATATATATATA		-1	-1	-1	-1	-1	-1	0
2	1915578	TTATATATATATATATATATATATATATATA	T	PASS	intron_variant	MODIFIER	CUL2	477952	transcript	XM_022406067.1	protein_coding	3	c.119+942_119+971delTATATATATATATATATATATATATATATA		-1	-1	-1	-1	-1	-1	0
2	1915578	TTATATATATATATATATATATATATATATA	T	PASS	intron_variant	MODIFIER	CUL2	477952	transcript	XM_005616941.3	protein_coding	2	c.119+942_119+971delTATATATATATATATATATATATATATATA		-1	-1	-1	-1	-1	-1	0
2	1915578	TTATATATATATATATATATATATATATATA	T	PASS	intron_variant	MODIFIER	CUL2	477952	transcript	XM_005616940.3	protein_coding	2	c.119+942_119+971delTATATATATATATATATATATATATATATA		-1	-1	-1	-1	-1	-1	0
2	1915578	TTATATATATATATATATATATATATATATA	T	PASS	intron_variant	MODIFIER	CUL2	477952	transcript	XM_005616939.3	protein_coding	2	c.119+942_119+971delTATATATATATATATATATATATATATATA		-1	-1	-1	-1	-1	-1	0
2	1915578	TTATATATATATATATATATATATATATATA	T	PASS	intron_variant	MODIFIER	CUL2	477952	transcript	XM_005616943.3	protein_coding	2	c.119+942_119+971delTATATATATATATATATATATATATATATA		-1	-1	-1	-1	-1	-1	0
2	1915578	TTATATATATATATATATATATATATATATA	T	PASS	intron_variant	MODIFIER	CUL2	477952	transcript	XM_014121377.2	protein_coding	2	c.119+942_119+971delTATATATATATATATATATATATATATATA		-1	-1	-1	-1	-1	-1	0
2	2046532	G	T	PASS	downstream_gene_variant	MODIFIER	LOC111094492	111094492	transcript	XR_002623800.1	pseudogene	-1	n.*2523C>A		-1	-1	-1	-1	-1	-1	2523
2	2046532	G	T	PASS	intergenic_region	MODIFIER	CUL2-LOC111094492	477952-111094492	intergenic_region	477952-111094492		-1	n.2046532G>T		-1	-1	-1	-1	-1	-1	0
2	4784400	G	A	PASS	intron_variant	MODIFIER	LOC607539	607539	transcript	XR_002623433.1	pseudogene	23	n.3499-5162C>T		-1	-1	-1	-1	-1	-1	0
2	5094618	T	A	PASS	upstream_gene_variant	MODIFIER	LOC102156317	102156317	transcript	XM_022405918.1	protein_coding	-1	c.-3472T>A		-1	-1	-1	-1	-1	-1	3472
2	5094618	T	A	PASS	intergenic_region	MODIFIER	LOC491488-LOC102156317	491488-102156317	intergenic_region	491488-102156317		-1	n.5094618T>A		-1	-1	-1	-1	-1	-1	0
2	6485584	TA	T	PASS	intergenic_region	MODIFIER	LOC607901-LOC607908	607901-607908	intergenic_region	607901-607908		-1	n.6485585delA		-1	-1	-1	-1	-1	-1	0
2	7957343	C	T	PASS	intergenic_region	MODIFIER	LOC106560082-GPR158	106560082-477984	intergenic_region	106560082-477984		-1	n.7957343C>T		-1	-1	-1	-1	-1	-1	0
2	16333043	TTTAA	T	PASS	intergenic_region	MODIFIER	SVIL-JCAD	477965-477964	intergenic_region	477965-477964		-1	n.16333044_16333047delTTAA		-1	-1	-1	-1	-1	-1	0
2	16339668	C	G	PASS	intergenic_region	MODIFIER	SVIL-JCAD	477965-477964	intergenic_region	477965-477964		-1	n.16339668C>G		-1	-1	-1	-1	-1	-1	0
2	16368746	C	A	PASS	intergenic_region	MODIFIER	SVIL-JCAD	477965-477964	intergenic_region	477965-477964		-1	n.16368746C>A		-1	-1	-1	-1	-1	-1	0
2	16431794	A	G	PASS	intergenic_region	MODIFIER	SVIL-JCAD	477965-477964	intergenic_region	477965-477964		-1	n.16431794A>G		-1	-1	-1	-1	-1	-1	0
2	16431929	AT	A	PASS	intergenic_region	MODIFIER	SVIL-JCAD	477965-477964	intergenic_region	477965-477964		-1	n.16431930delT		-1	-1	-1	-1	-1	-1	0
2	16432112	G	A	PASS	intergenic_region	MODIFIER	SVIL-JCAD	477965-477964	intergenic_region	477965-477964		-1	n.16432112G>A		-1	-1	-1	-1	-1	-1	0
2	16432512	A	T	PASS	intergenic_region	MODIFIER	SVIL-JCAD	477965-477964	intergenic_region	477965-477964		-1	n.16432512A>T		-1	-1	-1	-1	-1	-1	0
2	16435097	T	C	PASS	intergenic_region	MODIFIER	SVIL-JCAD	477965-477964	intergenic_region	477965-477964		-1	n.16435097T>C		-1	-1	-1	-1	-1	-1	0
2	16435522	G	A	PASS	intergenic_region	MODIFIER	SVIL-JCAD	477965-477964	intergenic_region	477965-477964		-1	n.16435522G>A		-1	-1	-1	-1	-1	-1	0
2	16435770	G	GAC	PASS	intergenic_region	MODIFIER	SVIL-JCAD	477965-477964	intergenic_region	477965-477964		-1	n.16435770_16435771insAC		-1	-1	-1	-1	-1	-1	0
2	16449361	C	T	PASS	downstream_gene_variant	MODIFIER	JCAD	477964	transcript	XM_535151.6	protein_coding	-1	c.*7005G>A		-1	-1	-1	-1	-1	-1	4378
2	16449361	C	T	PASS	downstream_gene_variant	MODIFIER	JCAD	477964	transcript	XM_005617055.3	protein_coding	-1	c.*6965G>A		-1	-1	-1	-1	-1	-1	4378
2	16449361	C	T	PASS	intergenic_region	MODIFIER	SVIL-JCAD	477965-477964	intergenic_region	477965-477964		-1	n.16449361C>T		-1	-1	-1	-1	-1	-1	0
2	16472852	T	C	PASS	intron_variant	MODIFIER	JCAD	477964	transcript	XM_535151.6	protein_coding	2	c.281+6411A>G		-1	-1	-1	-1	-1	-1	0
2	16472852	T	C	PASS	intron_variant	MODIFIER	JCAD	477964	transcript	XM_005617055.3	protein_coding	2	c.281+6411A>G		-1	-1	-1	-1	-1	-1	0
2	16489322	C	A	PASS	upstream_gene_variant	MODIFIER	LOC111091384	111091384	transcript	XR_002616942.1	pseudogene	-1	n.-3063C>A		-1	-1	-1	-1	-1	-1	3063
2	16489322	C	A	PASS	intron_variant	MODIFIER	JCAD	477964	transcript	XM_535151.6	protein_coding	1	c.-58-9721G>T		-1	-1	-1	-1	-1	-1	0
2	16489322	C	A	PASS	intron_variant	MODIFIER	JCAD	477964	transcript	XM_005617055.3	protein_coding	1	c.-58-9721G>T		-1	-1	-1	-1	-1	-1	0
2	16507672	C	A	PASS	intron_variant	MODIFIER	JCAD	477964	transcript	XM_535151.6	protein_coding	1	c.-59+21220G>T		-1	-1	-1	-1	-1	-1	0
2	16507672	C	A	PASS	intron_variant	MODIFIER	LOC111091384	111091384	transcript	XR_002616942.1	pseudogene	1	n.2197-6765C>A		-1	-1	-1	-1	-1	-1	0
2	16507672	C	A	PASS	intron_variant	MODIFIER	JCAD	477964	transcript	XM_005617055.3	protein_coding	1	c.-59+21220G>T		-1	-1	-1	-1	-1	-1	0
2	16508180	A	ATATATATATATATATTTTTT	PASS	intron_variant	MODIFIER	JCAD	477964	transcript	XM_535151.6	protein_coding	1	c.-59+20711_-59+20712insAAAAAATATATATATATATA		-1	-1	-1	-1	-1	-1	0
2	16508180	A	ATATATATATATATATTTTTT	PASS	intron_variant	MODIFIER	LOC111091384	111091384	transcript	XR_002616942.1	pseudogene	1	n.2197-6257_2197-6256insTATATATATATATATTTTTT		-1	-1	-1	-1	-1	-1	0
2	16508180	A	ATATATATATATATATTTTTT	PASS	intron_variant	MODIFIER	JCAD	477964	transcript	XM_005617055.3	protein_coding	1	c.-59+20711_-59+20712insAAAAAATATATATATATATA		-1	-1	-1	-1	-1	-1	0
2	16508336	A	G	PASS	intron_variant	MODIFIER	JCAD	477964	transcript	XM_535151.6	protein_coding	1	c.-59+20556T>C		-1	-1	-1	-1	-1	-1	0
2	16508336	A	G	PASS	intron_variant	MODIFIER	LOC111091384	111091384	transcript	XR_002616942.1	pseudogene	1	n.2197-6101A>G		-1	-1	-1	-1	-1	-1	0
2	16508336	A	G	PASS	intron_variant	MODIFIER	JCAD	477964	transcript	XM_005617055.3	protein_coding	1	c.-59+20556T>C		-1	-1	-1	-1	-1	-1	0
2	16508452	C	T	PASS	intron_variant	MODIFIER	JCAD	477964	transcript	XM_535151.6	protein_coding	1	c.-59+20440G>A		-1	-1	-1	-1	-1	-1	0
2	16508452	C	T	PASS	intron_variant	MODIFIER	LOC111091384	111091384	transcript	XR_002616942.1	pseudogene	1	n.2197-5985C>T		-1	-1	-1	-1	-1	-1	0
2	16508452	C	T	PASS	intron_variant	MODIFIER	JCAD	477964	transcript	XM_005617055.3	protein_coding	1	c.-59+20440G>A		-1	-1	-1	-1	-1	-1	0
2	16509537	TGTTA	T	PASS	intron_variant	MODIFIER	JCAD	477964	transcript	XM_535151.6	protein_coding	1	c.-59+19351_-59+19354delTAAC		-1	-1	-1	-1	-1	-1	0
2	16509537	TGTTA	T	PASS	intron_variant	MODIFIER	LOC111091384	111091384	transcript	XR_002616942.1	pseudogene	1	n.2197-4899_2197-4896delGTTA		-1	-1	-1	-1	-1	-1	0
2	16509537	TGTTA	T	PASS	intron_variant	MODIFIER	JCAD	477964	transcript	XM_005617055.3	protein_coding	1	c.-59+19351_-59+19354delTAAC		-1	-1	-1	-1	-1	-1	0
2	16522715	AT	A	PASS	intron_variant	MODIFIER	JCAD	477964	transcript	XM_535151.6	protein_coding	1	c.-59+6176delA		-1	-1	-1	-1	-1	-1	0
2	16522715	AT	A	PASS	intron_variant	MODIFIER	LOC111091384	111091384	transcript	XR_002616942.1	pseudogene	3	n.2582-4379delT		-1	-1	-1	-1	-1	-1	0
2	16522715	AT	A	PASS	intron_variant	MODIFIER	JCAD	477964	transcript	XM_005617055.3	protein_coding	1	c.-59+6176delA		-1	-1	-1	-1	-1	-1	0
2	16573337	GAGGA	G	PASS	intergenic_region	MODIFIER	JCAD-LOC100682866	477964-100682866	intergenic_region	477964-100682866		-1	n.16573338_16573341delAGGA		-1	-1	-1	-1	-1	-1	0
2	16574712	C	T	PASS	intergenic_region	MODIFIER	JCAD-LOC100682866	477964-100682866	intergenic_region	477964-100682866		-1	n.16574712C>T		-1	-1	-1	-1	-1	-1	0
2	16575817	C	T	PASS	intergenic_region	MODIFIER	JCAD-LOC100682866	477964-100682866	intergenic_region	477964-100682866		-1	n.16575817C>T		-1	-1	-1	-1	-1	-1	0
2	16676963	T	C	PASS	intron_variant	MODIFIER	MTPAP	477963	transcript	XM_535150.6	protein_coding	6	c.1225+2920A>G		-1	-1	-1	-1	-1	-1	0
2	16695283	CT	C	PASS	intron_variant	MODIFIER	MTPAP	477963	transcript	XM_535150.6	protein_coding	1	c.154+267delA		-1	-1	-1	-1	-1	-1	0
2	16700841	C	T	PASS	intergenic_region	MODIFIER	MTPAP-MAP3K8	477963-487085	intergenic_region	477963-487085		-1	n.16700841C>T		-1	-1	-1	-1	-1	-1	0
2	16724088	A	G	PASS	intron_variant	MODIFIER	MAP3K8	487085	transcript	XM_005617056.3	protein_coding	3	c.336+1431A>G		-1	-1	-1	-1	-1	-1	0
2	16724088	A	G	PASS	intron_variant	MODIFIER	MAP3K8	487085	transcript	XM_005617057.3	protein_coding	3	c.336+1431A>G		-1	-1	-1	-1	-1	-1	0
2	16724088	A	G	PASS	intron_variant	MODIFIER	MAP3K8	487085	transcript	XM_544213.6	protein_coding	2	c.336+1431A>G		-1	-1	-1	-1	-1	-1	0
2	16724088	A	G	PASS	intron_variant	MODIFIER	MAP3K8	487085	transcript	XM_014122101.2	protein_coding	2	c.336+1431A>G		-1	-1	-1	-1	-1	-1	0
2	16725575	G	A	PASS	intron_variant	MODIFIER	MAP3K8	487085	transcript	XM_005617056.3	protein_coding	3	c.337-2466G>A		-1	-1	-1	-1	-1	-1	0
2	16725575	G	A	PASS	intron_variant	MODIFIER	MAP3K8	487085	transcript	XM_005617057.3	protein_coding	3	c.337-2466G>A		-1	-1	-1	-1	-1	-1	0
2	16725575	G	A	PASS	intron_variant	MODIFIER	MAP3K8	487085	transcript	XM_544213.6	protein_coding	2	c.337-2466G>A		-1	-1	-1	-1	-1	-1	0
2	16725575	G	A	PASS	intron_variant	MODIFIER	MAP3K8	487085	transcript	XM_014122101.2	protein_coding	2	c.337-2466G>A		-1	-1	-1	-1	-1	-1	0
2	16728817	T	C	PASS	intron_variant	MODIFIER	MAP3K8	487085	transcript	XM_005617056.3	protein_coding	4	c.504+609T>C		-1	-1	-1	-1	-1	-1	0
2	16728817	T	C	PASS	intron_variant	MODIFIER	MAP3K8	487085	transcript	XM_005617057.3	protein_coding	4	c.504+609T>C		-1	-1	-1	-1	-1	-1	0
2	16728817	T	C	PASS	intron_variant	MODIFIER	MAP3K8	487085	transcript	XM_544213.6	protein_coding	3	c.504+609T>C		-1	-1	-1	-1	-1	-1	0
2	16728817	T	C	PASS	intron_variant	MODIFIER	MAP3K8	487085	transcript	XM_014122101.2	protein_coding	3	c.504+609T>C		-1	-1	-1	-1	-1	-1	0
2	16729040	G	C	PASS	intron_variant	MODIFIER	MAP3K8	487085	transcript	XM_005617056.3	protein_coding	4	c.504+832G>C		-1	-1	-1	-1	-1	-1	0
2	16729040	G	C	PASS	intron_variant	MODIFIER	MAP3K8	487085	transcript	XM_005617057.3	protein_coding	4	c.504+832G>C		-1	-1	-1	-1	-1	-1	0
2	16729040	G	C	PASS	intron_variant	MODIFIER	MAP3K8	487085	transcript	XM_544213.6	protein_coding	3	c.504+832G>C		-1	-1	-1	-1	-1	-1	0
2	16729040	G	C	PASS	intron_variant	MODIFIER	MAP3K8	487085	transcript	XM_014122101.2	protein_coding	3	c.504+832G>C		-1	-1	-1	-1	-1	-1	0
2	16729196	A	C	PASS	intron_variant	MODIFIER	MAP3K8	487085	transcript	XM_005617056.3	protein_coding	4	c.504+988A>C		-1	-1	-1	-1	-1	-1	0
2	16729196	A	C	PASS	intron_variant	MODIFIER	MAP3K8	487085	transcript	XM_005617057.3	protein_coding	4	c.504+988A>C		-1	-1	-1	-1	-1	-1	0
2	16729196	A	C	PASS	intron_variant	MODIFIER	MAP3K8	487085	transcript	XM_544213.6	protein_coding	3	c.504+988A>C		-1	-1	-1	-1	-1	-1	0
2	16729196	A	C	PASS	intron_variant	MODIFIER	MAP3K8	487085	transcript	XM_014122101.2	protein_coding	3	c.504+988A>C		-1	-1	-1	-1	-1	-1	0
2	16729849	G	GTTATA	PASS	intron_variant	MODIFIER	MAP3K8	487085	transcript	XM_005617056.3	protein_coding	4	c.505-575_505-574insTTATA		-1	-1	-1	-1	-1	-1	0
2	16729849	G	GTTATA	PASS	intron_variant	MODIFIER	MAP3K8	487085	transcript	XM_005617057.3	protein_coding	4	c.505-575_505-574insTTATA		-1	-1	-1	-1	-1	-1	0
2	16729849	G	GTTATA	PASS	intron_variant	MODIFIER	MAP3K8	487085	transcript	XM_544213.6	protein_coding	3	c.505-575_505-574insTTATA		-1	-1	-1	-1	-1	-1	0
2	16729849	G	GTTATA	PASS	intron_variant	MODIFIER	MAP3K8	487085	transcript	XM_014122101.2	protein_coding	3	c.505-575_505-574insTTATA		-1	-1	-1	-1	-1	-1	0
2	16729851	AG	A	PASS	intron_variant	MODIFIER	MAP3K8	487085	transcript	XM_005617056.3	protein_coding	4	c.505-572delG		-1	-1	-1	-1	-1	-1	0
2	16729851	AG	A	PASS	intron_variant	MODIFIER	MAP3K8	487085	transcript	XM_005617057.3	protein_coding	4	c.505-572delG		-1	-1	-1	-1	-1	-1	0
2	16729851	AG	A	PASS	intron_variant	MODIFIER	MAP3K8	487085	transcript	XM_544213.6	protein_coding	3	c.505-572delG		-1	-1	-1	-1	-1	-1	0
2	16729851	AG	A	PASS	intron_variant	MODIFIER	MAP3K8	487085	transcript	XM_014122101.2	protein_coding	3	c.505-572delG		-1	-1	-1	-1	-1	-1	0
2	16731800	T	G	PASS	intron_variant	MODIFIER	MAP3K8	487085	transcript	XM_005617056.3	protein_coding	5	c.767-550T>G		-1	-1	-1	-1	-1	-1	0
2	16731800	T	G	PASS	intron_variant	MODIFIER	MAP3K8	487085	transcript	XM_005617057.3	protein_coding	5	c.767-550T>G		-1	-1	-1	-1	-1	-1	0
2	16731800	T	G	PASS	intron_variant	MODIFIER	MAP3K8	487085	transcript	XM_544213.6	protein_coding	4	c.767-550T>G		-1	-1	-1	-1	-1	-1	0
2	16731800	T	G	PASS	intron_variant	MODIFIER	MAP3K8	487085	transcript	XM_014122101.2	protein_coding	4	c.767-550T>G		-1	-1	-1	-1	-1	-1	0
2	16740770	T	G	PASS	3_prime_UTR_variant	MODIFIER	MAP3K8	487085	transcript	XM_005617056.3	protein_coding	9	c.*1266T>G		-1	-1	-1	-1	-1	-1	1266
2	16740770	T	G	PASS	3_prime_UTR_variant	MODIFIER	MAP3K8	487085	transcript	XM_005617057.3	protein_coding	9	c.*1266T>G		-1	-1	-1	-1	-1	-1	1266
2	16740770	T	G	PASS	3_prime_UTR_variant	MODIFIER	MAP3K8	487085	transcript	XM_544213.6	protein_coding	8	c.*1266T>G		-1	-1	-1	-1	-1	-1	1266
2	16740770	T	G	PASS	3_prime_UTR_variant	MODIFIER	MAP3K8	487085	transcript	XM_014122101.2	protein_coding	8	c.*1266T>G		-1	-1	-1	-1	-1	-1	1266
2	16744671	TCC	T	PASS	downstream_gene_variant	MODIFIER	MAP3K8	487085	transcript	XM_005617056.3	protein_coding	-1	c.*5168_*5169delCC		-1	-1	-1	-1	-1	-1	3856
2	16744671	TCC	T	PASS	downstream_gene_variant	MODIFIER	MAP3K8	487085	transcript	XM_005617057.3	protein_coding	-1	c.*5168_*5169delCC		-1	-1	-1	-1	-1	-1	3856
2	16744671	TCC	T	PASS	downstream_gene_variant	MODIFIER	MAP3K8	487085	transcript	XM_544213.6	protein_coding	-1	c.*5168_*5169delCC		-1	-1	-1	-1	-1	-1	3856
2	16744671	TCC	T	PASS	downstream_gene_variant	MODIFIER	MAP3K8	487085	transcript	XM_014122101.2	protein_coding	-1	c.*5168_*5169delCC		-1	-1	-1	-1	-1	-1	3856
2	16744671	TCC	T	PASS	intergenic_region	MODIFIER	MAP3K8-LOC102157109	487085-102157109	intergenic_region	487085-102157109		-1	n.16744672_16744673delCC		-1	-1	-1	-1	-1	-1	0
2	16751102	T	C	PASS	intergenic_region	MODIFIER	MAP3K8-LOC102157109	487085-102157109	intergenic_region	487085-102157109		-1	n.16751102T>C		-1	-1	-1	-1	-1	-1	0
2	16757063	G	A	PASS	intergenic_region	MODIFIER	MAP3K8-LOC102157109	487085-102157109	intergenic_region	487085-102157109		-1	n.16757063G>A		-1	-1	-1	-1	-1	-1	0
2	16937401	G	A	PASS	intergenic_region	MODIFIER	LOC487083-LOC106560017	487083-106560017	intergenic_region	487083-106560017		-1	n.16937401G>A		-1	-1	-1	-1	-1	-1	0
2	17095518	CA	C	PASS	intron_variant	MODIFIER	LOC111091390	111091390	transcript	XR_002616957.1	pseudogene	1	n.124-13483delT		-1	-1	-1	-1	-1	-1	0
2	17101024	A	T	PASS	intron_variant	MODIFIER	LOC111091390	111091390	transcript	XR_002616957.1	pseudogene	1	n.124-18988T>A		-1	-1	-1	-1	-1	-1	0
2	17133122	G	A	PASS	upstream_gene_variant	MODIFIER	LOC111091390	111091390	transcript	XR_002616957.1	pseudogene	-1	n.-967C>T		-1	-1	-1	-1	-1	-1	967
2	17133122	G	A	PASS	intergenic_region	MODIFIER	LOC111091390-TRNAK-CUU	111091390-111094724	intergenic_region	111091390-111094724		-1	n.17133122G>A		-1	-1	-1	-1	-1	-1	0
2	17142933	G	T	PASS	intergenic_region	MODIFIER	LOC111091390-TRNAK-CUU	111091390-111094724	intergenic_region	111091390-111094724		-1	n.17142933G>T		-1	-1	-1	-1	-1	-1	0
2	17875075	G	T	PASS	intron_variant	MODIFIER	MPP7	487080	transcript	XM_005617061.3	protein_coding	1	c.-125-10506G>T		-1	-1	-1	-1	-1	-1	0
2	17875075	G	T	PASS	intron_variant	MODIFIER	MPP7	487080	transcript	XM_022407197.1	protein_coding	1	c.-125-10506G>T		-1	-1	-1	-1	-1	-1	0
2	17875075	G	T	PASS	intron_variant	MODIFIER	MPP7	487080	transcript	XM_022407215.1	protein_coding	1	c.-125-10506G>T		-1	-1	-1	-1	-1	-1	0
2	17875075	G	T	PASS	intron_variant	MODIFIER	MPP7	487080	transcript	XM_014122122.2	protein_coding	1	c.-125-10506G>T		-1	-1	-1	-1	-1	-1	0
2	17875075	G	T	PASS	intron_variant	MODIFIER	MPP7	487080	transcript	XM_005617062.3	protein_coding	1	c.-125-10506G>T		-1	-1	-1	-1	-1	-1	0
2	17875075	G	T	PASS	intron_variant	MODIFIER	MPP7	487080	transcript	XM_014122130.2	protein_coding	1	c.-285-10506G>T		-1	-1	-1	-1	-1	-1	0
2	17875075	G	T	PASS	intron_variant	MODIFIER	MPP7	487080	transcript	XM_014122134.2	protein_coding	1	c.-125-10506G>T		-1	-1	-1	-1	-1	-1	0
2	17875075	G	T	PASS	intron_variant	MODIFIER	MPP7	487080	transcript	XM_022407225.1	protein_coding	1	c.-125-10506G>T		-1	-1	-1	-1	-1	-1	0
2	17875075	G	T	PASS	intron_variant	MODIFIER	MPP7	487080	transcript	XM_005617063.3	protein_coding	1	c.-125-10506G>T		-1	-1	-1	-1	-1	-1	0
2	17875075	G	T	PASS	intron_variant	MODIFIER	MPP7	487080	transcript	XM_005617064.3	protein_coding	1	c.-125-10506G>T		-1	-1	-1	-1	-1	-1	0
2	17875075	G	T	PASS	intron_variant	MODIFIER	MPP7	487080	transcript	XM_014122121.2	protein_coding	1	c.-125-10506G>T		-1	-1	-1	-1	-1	-1	0
2	17875208	G	C	PASS	intron_variant	MODIFIER	MPP7	487080	transcript	XM_005617061.3	protein_coding	1	c.-125-10373G>C		-1	-1	-1	-1	-1	-1	0
2	17875208	G	C	PASS	intron_variant	MODIFIER	MPP7	487080	transcript	XM_022407197.1	protein_coding	1	c.-125-10373G>C		-1	-1	-1	-1	-1	-1	0
2	17875208	G	C	PASS	intron_variant	MODIFIER	MPP7	487080	transcript	XM_022407215.1	protein_coding	1	c.-125-10373G>C		-1	-1	-1	-1	-1	-1	0
2	17875208	G	C	PASS	intron_variant	MODIFIER	MPP7	487080	transcript	XM_014122122.2	protein_coding	1	c.-125-10373G>C		-1	-1	-1	-1	-1	-1	0
2	17875208	G	C	PASS	intron_variant	MODIFIER	MPP7	487080	transcript	XM_005617062.3	protein_coding	1	c.-125-10373G>C		-1	-1	-1	-1	-1	-1	0
2	17875208	G	C	PASS	intron_variant	MODIFIER	MPP7	487080	transcript	XM_014122130.2	protein_coding	1	c.-285-10373G>C		-1	-1	-1	-1	-1	-1	0
2	17875208	G	C	PASS	intron_variant	MODIFIER	MPP7	487080	transcript	XM_014122134.2	protein_coding	1	c.-125-10373G>C		-1	-1	-1	-1	-1	-1	0
2	17875208	G	C	PASS	intron_variant	MODIFIER	MPP7	487080	transcript	XM_022407225.1	protein_coding	1	c.-125-10373G>C		-1	-1	-1	-1	-1	-1	0
2	17875208	G	C	PASS	intron_variant	MODIFIER	MPP7	487080	transcript	XM_005617063.3	protein_coding	1	c.-125-10373G>C		-1	-1	-1	-1	-1	-1	0
2	17875208	G	C	PASS	intron_variant	MODIFIER	MPP7	487080	transcript	XM_005617064.3	protein_coding	1	c.-125-10373G>C		-1	-1	-1	-1	-1	-1	0
2	17875208	G	C	PASS	intron_variant	MODIFIER	MPP7	487080	transcript	XM_014122121.2	protein_coding	1	c.-125-10373G>C		-1	-1	-1	-1	-1	-1	0
2	17875210	G	T	PASS	intron_variant	MODIFIER	MPP7	487080	transcript	XM_005617061.3	protein_coding	1	c.-125-10371G>T		-1	-1	-1	-1	-1	-1	0
2	17875210	G	T	PASS	intron_variant	MODIFIER	MPP7	487080	transcript	XM_022407197.1	protein_coding	1	c.-125-10371G>T		-1	-1	-1	-1	-1	-1	0
2	17875210	G	T	PASS	intron_variant	MODIFIER	MPP7	487080	transcript	XM_022407215.1	protein_coding	1	c.-125-10371G>T		-1	-1	-1	-1	-1	-1	0
2	17875210	G	T	PASS	intron_variant	MODIFIER	MPP7	487080	transcript	XM_014122122.2	protein_coding	1	c.-125-10371G>T		-1	-1	-1	-1	-1	-1	0
2	17875210	G	T	PASS	intron_variant	MODIFIER	MPP7	487080	transcript	XM_005617062.3	protein_coding	1	c.-125-10371G>T		-1	-1	-1	-1	-1	-1	0
2	17875210	G	T	PASS	intron_variant	MODIFIER	MPP7	487080	transcript	XM_014122130.2	protein_coding	1	c.-285-10371G>T		-1	-1	-1	-1	-1	-1	0
2	17875210	G	T	PASS	intron_variant	MODIFIER	MPP7	487080	transcript	XM_014122134.2	protein_coding	1	c.-125-10371G>T		-1	-1	-1	-1	-1	-1	0
2	17875210	G	T	PASS	intron_variant	MODIFIER	MPP7	487080	transcript	XM_022407225.1	protein_coding	1	c.-125-10371G>T		-1	-1	-1	-1	-1	-1	0
2	17875210	G	T	PASS	intron_variant	MODIFIER	MPP7	487080	transcript	XM_005617063.3	protein_coding	1	c.-125-10371G>T		-1	-1	-1	-1	-1	-1	0
2	17875210	G	T	PASS	intron_variant	MODIFIER	MPP7	487080	transcript	XM_005617064.3	protein_coding	1	c.-125-10371G>T		-1	-1	-1	-1	-1	-1	0
2	17875210	G	T	PASS	intron_variant	MODIFIER	MPP7	487080	transcript	XM_014122121.2	protein_coding	1	c.-125-10371G>T		-1	-1	-1	-1	-1	-1	0
2	18107309	C	CTA	PASS	downstream_gene_variant	MODIFIER	MPP7	487080	transcript	XM_005617061.3	protein_coding	-1	c.*5617_*5618insTA		-1	-1	-1	-1	-1	-1	3042
2	18107309	C	CTA	PASS	downstream_gene_variant	MODIFIER	MPP7	487080	transcript	XM_022407197.1	protein_coding	-1	c.*5617_*5618insTA		-1	-1	-1	-1	-1	-1	3042
2	18107309	C	CTA	PASS	downstream_gene_variant	MODIFIER	MPP7	487080	transcript	XM_022407215.1	protein_coding	-1	c.*5617_*5618insTA		-1	-1	-1	-1	-1	-1	3042
2	18107309	C	CTA	PASS	downstream_gene_variant	MODIFIER	MPP7	487080	transcript	XM_014122122.2	protein_coding	-1	c.*5617_*5618insTA		-1	-1	-1	-1	-1	-1	3042
2	18107309	C	CTA	PASS	downstream_gene_variant	MODIFIER	MPP7	487080	transcript	XM_005617062.3	protein_coding	-1	c.*5617_*5618insTA		-1	-1	-1	-1	-1	-1	3042
2	18107309	C	CTA	PASS	downstream_gene_variant	MODIFIER	MPP7	487080	transcript	XM_014122130.2	protein_coding	-1	c.*5617_*5618insTA		-1	-1	-1	-1	-1	-1	3042
2	18107309	C	CTA	PASS	downstream_gene_variant	MODIFIER	MPP7	487080	transcript	XM_014122134.2	protein_coding	-1	c.*5617_*5618insTA		-1	-1	-1	-1	-1	-1	3042
2	18107309	C	CTA	PASS	downstream_gene_variant	MODIFIER	MPP7	487080	transcript	XM_022407225.1	protein_coding	-1	c.*5617_*5618insTA		-1	-1	-1	-1	-1	-1	3042
2	18107309	C	CTA	PASS	downstream_gene_variant	MODIFIER	MPP7	487080	transcript	XM_005617063.3	protein_coding	-1	c.*5617_*5618insTA		-1	-1	-1	-1	-1	-1	3042
2	18107309	C	CTA	PASS	downstream_gene_variant	MODIFIER	MPP7	487080	transcript	XM_005617064.3	protein_coding	-1	c.*5617_*5618insTA		-1	-1	-1	-1	-1	-1	3042
2	18107309	C	CTA	PASS	downstream_gene_variant	MODIFIER	MPP7	487080	transcript	XM_014122121.2	protein_coding	-1	c.*5617_*5618insTA		-1	-1	-1	-1	-1	-1	3042
2	18107309	C	CTA	PASS	downstream_gene_variant	MODIFIER	MPP7	487080	transcript	XM_022407207.1	protein_coding	-1	c.*5617_*5618insTA		-1	-1	-1	-1	-1	-1	3042
2	18107309	C	CTA	PASS	intergenic_region	MODIFIER	MPP7-LOC111091399	487080-111091399	intergenic_region	487080-111091399		-1	n.18107309_18107310insTA		-1	-1	-1	-1	-1	-1	0
2	18107311	TCC	T	PASS	downstream_gene_variant	MODIFIER	MPP7	487080	transcript	XM_005617061.3	protein_coding	-1	c.*5620_*5621delCC		-1	-1	-1	-1	-1	-1	3044
2	18107311	TCC	T	PASS	downstream_gene_variant	MODIFIER	MPP7	487080	transcript	XM_022407197.1	protein_coding	-1	c.*5620_*5621delCC		-1	-1	-1	-1	-1	-1	3044
2	18107311	TCC	T	PASS	downstream_gene_variant	MODIFIER	MPP7	487080	transcript	XM_022407215.1	protein_coding	-1	c.*5620_*5621delCC		-1	-1	-1	-1	-1	-1	3044
2	18107311	TCC	T	PASS	downstream_gene_variant	MODIFIER	MPP7	487080	transcript	XM_014122122.2	protein_coding	-1	c.*5620_*5621delCC		-1	-1	-1	-1	-1	-1	3044
2	18107311	TCC	T	PASS	downstream_gene_variant	MODIFIER	MPP7	487080	transcript	XM_005617062.3	protein_coding	-1	c.*5620_*5621delCC		-1	-1	-1	-1	-1	-1	3044
2	18107311	TCC	T	PASS	downstream_gene_variant	MODIFIER	MPP7	487080	transcript	XM_014122130.2	protein_coding	-1	c.*5620_*5621delCC		-1	-1	-1	-1	-1	-1	3044
2	18107311	TCC	T	PASS	downstream_gene_variant	MODIFIER	MPP7	487080	transcript	XM_014122134.2	protein_coding	-1	c.*5620_*5621delCC		-1	-1	-1	-1	-1	-1	3044
2	18107311	TCC	T	PASS	downstream_gene_variant	MODIFIER	MPP7	487080	transcript	XM_022407225.1	protein_coding	-1	c.*5620_*5621delCC		-1	-1	-1	-1	-1	-1	3044
2	18107311	TCC	T	PASS	downstream_gene_variant	MODIFIER	MPP7	487080	transcript	XM_005617063.3	protein_coding	-1	c.*5620_*5621delCC		-1	-1	-1	-1	-1	-1	3044
2	18107311	TCC	T	PASS	downstream_gene_variant	MODIFIER	MPP7	487080	transcript	XM_005617064.3	protein_coding	-1	c.*5620_*5621delCC		-1	-1	-1	-1	-1	-1	3044
2	18107311	TCC	T	PASS	downstream_gene_variant	MODIFIER	MPP7	487080	transcript	XM_014122121.2	protein_coding	-1	c.*5620_*5621delCC		-1	-1	-1	-1	-1	-1	3044
2	18107311	TCC	T	PASS	downstream_gene_variant	MODIFIER	MPP7	487080	transcript	XM_022407207.1	protein_coding	-1	c.*5620_*5621delCC		-1	-1	-1	-1	-1	-1	3044
2	18107311	TCC	T	PASS	intergenic_region	MODIFIER	MPP7-LOC111091399	487080-111091399	intergenic_region	487080-111091399		-1	n.18107312_18107313delCC		-1	-1	-1	-1	-1	-1	0
2	18180031	A	G	PASS	upstream_gene_variant	MODIFIER	LOC111091400	111091400	transcript	XR_002616977.1	pseudogene	-1	n.-3043T>C		-1	-1	-1	-1	-1	-1	3043
2	18180031	A	G	PASS	upstream_gene_variant	MODIFIER	ARMC4	477959	transcript	XM_005617066.3	protein_coding	-1	c.-10680A>G		-1	-1	-1	-1	-1	-1	1314
2	18180031	A	G	PASS	downstream_gene_variant	MODIFIER	LOC111091399	111091399	transcript	XR_002616975.1	pseudogene	-1	n.*3848A>G		-1	-1	-1	-1	-1	-1	3848
2	18180031	A	G	PASS	intron_variant	MODIFIER	ARMC4	477959	transcript	XM_535146.7	protein_coding	1	c.-37-1184A>G		-1	-1	-1	-1	-1	-1	0
2	18180031	A	G	PASS	intron_variant	MODIFIER	ARMC4	477959	transcript	XM_005617067.3	protein_coding	1	c.-37-1184A>G		-1	-1	-1	-1	-1	-1	0
2	18180031	A	G	PASS	intron_variant	MODIFIER	ARMC4	477959	transcript	XM_005617065.3	protein_coding	1	c.-37-1184A>G		-1	-1	-1	-1	-1	-1	0
2	18185188	G	T	PASS	intron_variant	MODIFIER	ARMC4	477959	transcript	XM_535146.7	protein_coding	2	c.225-2369G>T		-1	-1	-1	-1	-1	-1	0
2	18185188	G	T	PASS	intron_variant	MODIFIER	ARMC4	477959	transcript	XM_005617067.3	protein_coding	2	c.225-2369G>T		-1	-1	-1	-1	-1	-1	0
2	18185188	G	T	PASS	intron_variant	MODIFIER	ARMC4	477959	transcript	XM_005617065.3	protein_coding	2	c.225-2369G>T		-1	-1	-1	-1	-1	-1	0
2	18185188	G	T	PASS	intron_variant	MODIFIER	ARMC4	477959	transcript	XM_005617066.3	protein_coding	1	c.-123+3713G>T		-1	-1	-1	-1	-1	-1	0
2	18222069	C	A	PASS	intron_variant	MODIFIER	ARMC4	477959	transcript	XM_535146.7	protein_coding	9	c.1242-3383C>A		-1	-1	-1	-1	-1	-1	0
2	18222069	C	A	PASS	intron_variant	MODIFIER	ARMC4	477959	transcript	XM_005617067.3	protein_coding	9	c.1242-3383C>A		-1	-1	-1	-1	-1	-1	0
2	18222069	C	A	PASS	intron_variant	MODIFIER	ARMC4	477959	transcript	XM_005617065.3	protein_coding	9	c.1242-3383C>A		-1	-1	-1	-1	-1	-1	0
2	18222069	C	A	PASS	intron_variant	MODIFIER	ARMC4	477959	transcript	XM_005617066.3	protein_coding	7	c.738-3383C>A		-1	-1	-1	-1	-1	-1	0
2	18222069	C	A	PASS	intron_variant	MODIFIER	ARMC4	477959	transcript	XM_022407260.1	protein_coding	4	c.318-3383C>A		-1	-1	-1	-1	-1	-1	0
2	18269582	T	C	PASS	intron_variant	MODIFIER	ARMC4	477959	transcript	XM_535146.7	protein_coding	16	c.2499-11941T>C		-1	-1	-1	-1	-1	-1	0
2	18269582	T	C	PASS	intron_variant	MODIFIER	ARMC4	477959	transcript	XM_005617067.3	protein_coding	16	c.2499-1678T>C		-1	-1	-1	-1	-1	-1	0
2	18269582	T	C	PASS	intron_variant	MODIFIER	ARMC4	477959	transcript	XM_005617065.3	protein_coding	16	c.2499-11941T>C		-1	-1	-1	-1	-1	-1	0
2	18269582	T	C	PASS	intron_variant	MODIFIER	ARMC4	477959	transcript	XM_005617066.3	protein_coding	14	c.1995-11941T>C		-1	-1	-1	-1	-1	-1	0
2	18269582	T	C	PASS	intron_variant	MODIFIER	ARMC4	477959	transcript	XM_022407260.1	protein_coding	11	c.1575-11941T>C		-1	-1	-1	-1	-1	-1	0
2	18269590	C	G	PASS	intron_variant	MODIFIER	ARMC4	477959	transcript	XM_535146.7	protein_coding	16	c.2499-11933C>G		-1	-1	-1	-1	-1	-1	0
2	18269590	C	G	PASS	intron_variant	MODIFIER	ARMC4	477959	transcript	XM_005617067.3	protein_coding	16	c.2499-1670C>G		-1	-1	-1	-1	-1	-1	0
2	18269590	C	G	PASS	intron_variant	MODIFIER	ARMC4	477959	transcript	XM_005617065.3	protein_coding	16	c.2499-11933C>G		-1	-1	-1	-1	-1	-1	0
2	18269590	C	G	PASS	intron_variant	MODIFIER	ARMC4	477959	transcript	XM_005617066.3	protein_coding	14	c.1995-11933C>G		-1	-1	-1	-1	-1	-1	0
2	18269590	C	G	PASS	intron_variant	MODIFIER	ARMC4	477959	transcript	XM_022407260.1	protein_coding	11	c.1575-11933C>G		-1	-1	-1	-1	-1	-1	0
2	18274056	C	T	PASS	intron_variant	MODIFIER	ARMC4	477959	transcript	XM_535146.7	protein_coding	16	c.2499-7467C>T		-1	-1	-1	-1	-1	-1	0
2	18274056	C	T	PASS	intron_variant	MODIFIER	ARMC4	477959	transcript	XM_005617067.3	protein_coding	17	c.*29+2761C>T		-1	-1	-1	-1	-1	-1	0
2	18274056	C	T	PASS	intron_variant	MODIFIER	ARMC4	477959	transcript	XM_005617065.3	protein_coding	16	c.2499-7467C>T		-1	-1	-1	-1	-1	-1	0
2	18274056	C	T	PASS	intron_variant	MODIFIER	ARMC4	477959	transcript	XM_005617066.3	protein_coding	14	c.1995-7467C>T		-1	-1	-1	-1	-1	-1	0
2	18274056	C	T	PASS	intron_variant	MODIFIER	ARMC4	477959	transcript	XM_022407260.1	protein_coding	11	c.1575-7467C>T		-1	-1	-1	-1	-1	-1	0
2	22038508	AT	A	PASS	intron_variant	MODIFIER	FAM107B	607279	transcript	XM_014122522.2	protein_coding	1	c.-59+23168delT		-1	-1	-1	-1	-1	-1	0
2	22038508	AT	A	PASS	intron_variant	MODIFIER	FAM107B	607279	transcript	XM_014122521.2	protein_coding	1	c.-57+22498delT		-1	-1	-1	-1	-1	-1	0
2	23540515	GC	G	PASS	intron_variant	MODIFIER	CCDC3	607593	transcript	XM_844332.3	protein_coding	2	c.550-49945delC		-1	-1	-1	-1	-1	-1	0
2	23540531	A	C	PASS	intron_variant	MODIFIER	CCDC3	607593	transcript	XM_844332.3	protein_coding	2	c.550-49930A>C		-1	-1	-1	-1	-1	-1	0
2	23540532	A	G	PASS	intron_variant	MODIFIER	CCDC3	607593	transcript	XM_844332.3	protein_coding	2	c.550-49929A>G		-1	-1	-1	-1	-1	-1	0
2	23540533	A	T	PASS	intron_variant	MODIFIER	CCDC3	607593	transcript	XM_844332.3	protein_coding	2	c.550-49928A>T		-1	-1	-1	-1	-1	-1	0
2	25423510	GA	G	PASS	intron_variant	MODIFIER	CELF2	607310	transcript	XM_022407916.1	protein_coding	1	c.54-19293delT		-1	-1	-1	-1	-1	-1	0
2	25423510	GA	G	PASS	intron_variant	MODIFIER	CELF2	607310	transcript	XM_022407922.1	protein_coding	2	c.-55-19293delT		-1	-1	-1	-1	-1	-1	0
2	25672681	G	A	PASS	intron_variant	MODIFIER	CELF2	607310	transcript	XM_022407922.1	protein_coding	1	c.-94-47401C>T		-1	-1	-1	-1	-1	-1	0
2	25685410	A	G	PASS	intron_variant	MODIFIER	CELF2	607310	transcript	XM_022407922.1	protein_coding	1	c.-94-60130T>C		-1	-1	-1	-1	-1	-1	0
2	29962044	G	GGGGGGGGGGGGC	PASS	intergenic_region	MODIFIER	IL2RA-IL15RA	403870-487141	intergenic_region	403870-487141		-1	n.29962044_29962045insGGGGGGGGGGGC		-1	-1	-1	-1	-1	-1	0
2	30510968	A	AG	PASS	intergenic_region	MODIFIER	LOC111091691-TUBAL3	111091691-487148	intergenic_region	111091691-487148		-1	n.30510968_30510969insG		-1	-1	-1	-1	-1	-1	0
2	30511013	G	GGCC	PASS	intergenic_region	MODIFIER	LOC111091691-TUBAL3	111091691-487148	intergenic_region	111091691-487148		-1	n.30511013_30511014insGCC		-1	-1	-1	-1	-1	-1	0
2	32273102	CA	C	PASS	upstream_gene_variant	MODIFIER	LOC111094193	111094193	transcript	111094193	pseudogene	-1	n.-4234delA		-1	-1	-1	-1	-1	-1	4234
2	32273102	CA	C	PASS	intergenic_region	MODIFIER	PFKP-LOC111094193	478019-111094193	intergenic_region	478019-111094193		-1	n.32273103delA		-1	-1	-1	-1	-1	-1	0
2	32273110	A	AGCC	PASS	upstream_gene_variant	MODIFIER	LOC111094193	111094193	transcript	111094193	pseudogene	-1	n.-4227_-4226insGCC		-1	-1	-1	-1	-1	-1	4226
2	32273110	A	AGCC	PASS	intergenic_region	MODIFIER	PFKP-LOC111094193	478019-111094193	intergenic_region	478019-111094193		-1	n.32273110_32273111insGCC		-1	-1	-1	-1	-1	-1	0
2	33993532	T	TA	PASS	intergenic_region	MODIFIER	LOC111091742-LARP4B	111091742-478022	intergenic_region	111091742-478022		-1	n.33993532_33993533insA		-1	-1	-1	-1	-1	-1	0
2	33993539	T	A	PASS	intergenic_region	MODIFIER	LOC111091742-LARP4B	111091742-478022	intergenic_region	111091742-478022		-1	n.33993539T>A		-1	-1	-1	-1	-1	-1	0
2	33993545	T	TATTTTTA	PASS	intergenic_region	MODIFIER	LOC111091742-LARP4B	111091742-478022	intergenic_region	111091742-478022		-1	n.33993545_33993546insATTTTTA		-1	-1	-1	-1	-1	-1	0
2	39721571	CG	C	PASS	intron_variant	MODIFIER	LOC111092072	111092072	transcript	XR_002618538.1	pseudogene	2	n.341+35474delG		-1	-1	-1	-1	-1	-1	0
2	39721571	CG	C	PASS	intron_variant	MODIFIER	LOC111092072	111092072	transcript	XR_002618537.1	pseudogene	3	n.520+35474delG		-1	-1	-1	-1	-1	-1	0
2	39721571	CG	C	PASS	intron_variant	MODIFIER	LOC111092072	111092072	transcript	XR_002618536.1	pseudogene	2	n.331+35474delG		-1	-1	-1	-1	-1	-1	0
2	39721571	CG	C	PASS	intron_variant	MODIFIER	LOC111092072	111092072	transcript	XR_002618535.1	pseudogene	2	n.328+35474delG		-1	-1	-1	-1	-1	-1	0
2	39721574	T	C	PASS	intron_variant	MODIFIER	LOC111092072	111092072	transcript	XR_002618538.1	pseudogene	2	n.341+35476T>C		-1	-1	-1	-1	-1	-1	0
2	39721574	T	C	PASS	intron_variant	MODIFIER	LOC111092072	111092072	transcript	XR_002618537.1	pseudogene	3	n.520+35476T>C		-1	-1	-1	-1	-1	-1	0
2	39721574	T	C	PASS	intron_variant	MODIFIER	LOC111092072	111092072	transcript	XR_002618536.1	pseudogene	2	n.331+35476T>C		-1	-1	-1	-1	-1	-1	0
2	39721574	T	C	PASS	intron_variant	MODIFIER	LOC111092072	111092072	transcript	XR_002618535.1	pseudogene	2	n.328+35476T>C		-1	-1	-1	-1	-1	-1	0
2	39721578	T	A	PASS	intron_variant	MODIFIER	LOC111092072	111092072	transcript	XR_002618538.1	pseudogene	2	n.341+35480T>A		-1	-1	-1	-1	-1	-1	0
2	39721578	T	A	PASS	intron_variant	MODIFIER	LOC111092072	111092072	transcript	XR_002618537.1	pseudogene	3	n.520+35480T>A		-1	-1	-1	-1	-1	-1	0
2	39721578	T	A	PASS	intron_variant	MODIFIER	LOC111092072	111092072	transcript	XR_002618536.1	pseudogene	2	n.331+35480T>A		-1	-1	-1	-1	-1	-1	0
2	39721578	T	A	PASS	intron_variant	MODIFIER	LOC111092072	111092072	transcript	XR_002618535.1	pseudogene	2	n.328+35480T>A		-1	-1	-1	-1	-1	-1	0
2	39721579	G	A	PASS	intron_variant	MODIFIER	LOC111092072	111092072	transcript	XR_002618538.1	pseudogene	2	n.341+35481G>A		-1	-1	-1	-1	-1	-1	0
2	39721579	G	A	PASS	intron_variant	MODIFIER	LOC111092072	111092072	transcript	XR_002618537.1	pseudogene	3	n.520+35481G>A		-1	-1	-1	-1	-1	-1	0
2	39721579	G	A	PASS	intron_variant	MODIFIER	LOC111092072	111092072	transcript	XR_002618536.1	pseudogene	2	n.331+35481G>A		-1	-1	-1	-1	-1	-1	0
2	39721579	G	A	PASS	intron_variant	MODIFIER	LOC111092072	111092072	transcript	XR_002618535.1	pseudogene	2	n.328+35481G>A		-1	-1	-1	-1	-1	-1	0
2	42616532	C	CAG	PASS	intron_variant	MODIFIER	DHX29	478060	transcript	XM_535238.6	protein_coding	23	c.3517-1288_3517-1287insCT		-1	-1	-1	-1	-1	-1	0
2	42616532	C	CAG	PASS	intron_variant	MODIFIER	DHX29	478060	transcript	XR_291575.3	pseudogene	23	n.3638-1288_3638-1287insCT		-1	-1	-1	-1	-1	-1	0
2	44597037	G	A	PASS	intergenic_region	MODIFIER	ACTBL2-LOC106557902	487218-106557902	intergenic_region	487218-106557902		-1	n.44597037G>A		-1	-1	-1	-1	-1	-1	0
2	44597040	T	A	PASS	intergenic_region	MODIFIER	ACTBL2-LOC106557902	487218-106557902	intergenic_region	487218-106557902		-1	n.44597040T>A		-1	-1	-1	-1	-1	-1	0
2	44597067	C	CA	PASS	intergenic_region	MODIFIER	ACTBL2-LOC106557902	487218-106557902	intergenic_region	487218-106557902		-1	n.44597067_44597068insA		-1	-1	-1	-1	-1	-1	0
2	44597070	C	T	PASS	intergenic_region	MODIFIER	ACTBL2-LOC106557902	487218-106557902	intergenic_region	487218-106557902		-1	n.44597070C>T		-1	-1	-1	-1	-1	-1	0
2	45365567	C	CG	PASS	upstream_gene_variant	MODIFIER	PLK2	478063	transcript	XM_535242.7	protein_coding	-1	c.-121_-120insC		-1	-1	-1	-1	-1	-1	72
2	45365567	C	CG	PASS	intergenic_region	MODIFIER	PLK2-GAPT	478063-100683936	intergenic_region	478063-100683936		-1	n.45365567_45365568insG		-1	-1	-1	-1	-1	-1	0
2	45466756	T	A	PASS	intron_variant	MODIFIER	RAB3C	608817	transcript	XM_005617414.3	protein_coding	1	c.24+6584T>A		-1	-1	-1	-1	-1	-1	0
2	45466756	T	A	PASS	intron_variant	MODIFIER	RAB3C	608817	transcript	XM_845952.4	protein_coding	1	c.18+7415T>A		-1	-1	-1	-1	-1	-1	0
2	46816477	A	G	PASS	intron_variant	MODIFIER	LOC111094478	111094478	transcript	XR_002623786.1	pseudogene	3	n.454+31816A>G		-1	-1	-1	-1	-1	-1	0
2	46816477	A	G	PASS	intron_variant	MODIFIER	PDE4D	487221	transcript	XM_022415243.1	protein_coding	4	c.43-45124T>C		-1	-1	-1	-1	-1	-1	0
2	46816477	A	G	PASS	intron_variant	MODIFIER	PDE4D	487221	transcript	XM_022415245.1	protein_coding	6	c.43-45124T>C		-1	-1	-1	-1	-1	-1	0
2	46816477	A	G	PASS	intron_variant	MODIFIER	PDE4D	487221	transcript	XM_014106762.2	protein_coding	3	c.43-45124T>C		-1	-1	-1	-1	-1	-1	0
2	46816477	A	G	PASS	intron_variant	MODIFIER	PDE4D	487221	transcript	XM_014106770.2	protein_coding	2	c.43-45124T>C		-1	-1	-1	-1	-1	-1	0
2	46816477	A	G	PASS	intron_variant	MODIFIER	PDE4D	487221	transcript	XM_005617416.3	protein_coding	4	c.43-45124T>C		-1	-1	-1	-1	-1	-1	0
2	46816477	A	G	PASS	intron_variant	MODIFIER	PDE4D	487221	transcript	XM_005617417.3	protein_coding	3	c.43-45124T>C		-1	-1	-1	-1	-1	-1	0
2	46816477	A	G	PASS	intron_variant	MODIFIER	PDE4D	487221	transcript	XM_022415235.1	protein_coding	5	c.43-45124T>C		-1	-1	-1	-1	-1	-1	0
2	46816477	A	G	PASS	intron_variant	MODIFIER	LOC111094478	111094478	transcript	XR_002623787.1	pseudogene	2	n.312+31816A>G		-1	-1	-1	-1	-1	-1	0
2	46816543	C	G	PASS	intron_variant	MODIFIER	LOC111094478	111094478	transcript	XR_002623786.1	pseudogene	3	n.454+31882C>G		-1	-1	-1	-1	-1	-1	0
2	46816543	C	G	PASS	intron_variant	MODIFIER	PDE4D	487221	transcript	XM_022415243.1	protein_coding	4	c.43-45190G>C		-1	-1	-1	-1	-1	-1	0
2	46816543	C	G	PASS	intron_variant	MODIFIER	PDE4D	487221	transcript	XM_022415245.1	protein_coding	6	c.43-45190G>C		-1	-1	-1	-1	-1	-1	0
2	46816543	C	G	PASS	intron_variant	MODIFIER	PDE4D	487221	transcript	XM_014106762.2	protein_coding	3	c.43-45190G>C		-1	-1	-1	-1	-1	-1	0
2	46816543	C	G	PASS	intron_variant	MODIFIER	PDE4D	487221	transcript	XM_014106770.2	protein_coding	2	c.43-45190G>C		-1	-1	-1	-1	-1	-1	0
2	46816543	C	G	PASS	intron_variant	MODIFIER	PDE4D	487221	transcript	XM_005617416.3	protein_coding	4	c.43-45190G>C		-1	-1	-1	-1	-1	-1	0
2	46816543	C	G	PASS	intron_variant	MODIFIER	PDE4D	487221	transcript	XM_005617417.3	protein_coding	3	c.43-45190G>C		-1	-1	-1	-1	-1	-1	0
2	46816543	C	G	PASS	intron_variant	MODIFIER	PDE4D	487221	transcript	XM_022415235.1	protein_coding	5	c.43-45190G>C		-1	-1	-1	-1	-1	-1	0
2	46816543	C	G	PASS	intron_variant	MODIFIER	LOC111094478	111094478	transcript	XR_002623787.1	pseudogene	2	n.312+31882C>G		-1	-1	-1	-1	-1	-1	0
2	46852662	C	CT	PASS	intron_variant	MODIFIER	LOC111094478	111094478	transcript	XR_002623786.1	pseudogene	3	n.455-45239_455-45238insT		-1	-1	-1	-1	-1	-1	0
2	46852662	C	CT	PASS	intron_variant	MODIFIER	PDE4D	487221	transcript	XM_022415243.1	protein_coding	4	c.43-81310_43-81309insA		-1	-1	-1	-1	-1	-1	0
2	46852662	C	CT	PASS	intron_variant	MODIFIER	PDE4D	487221	transcript	XM_022415245.1	protein_coding	6	c.43-81310_43-81309insA		-1	-1	-1	-1	-1	-1	0
2	46852662	C	CT	PASS	intron_variant	MODIFIER	PDE4D	487221	transcript	XM_014106762.2	protein_coding	3	c.43-81310_43-81309insA		-1	-1	-1	-1	-1	-1	0
2	46852662	C	CT	PASS	intron_variant	MODIFIER	PDE4D	487221	transcript	XM_014106770.2	protein_coding	2	c.43-81310_43-81309insA		-1	-1	-1	-1	-1	-1	0
2	46852662	C	CT	PASS	intron_variant	MODIFIER	PDE4D	487221	transcript	XM_005617416.3	protein_coding	4	c.43-81310_43-81309insA		-1	-1	-1	-1	-1	-1	0
2	46852662	C	CT	PASS	intron_variant	MODIFIER	PDE4D	487221	transcript	XM_005617417.3	protein_coding	3	c.43-81310_43-81309insA		-1	-1	-1	-1	-1	-1	0
2	46852662	C	CT	PASS	intron_variant	MODIFIER	PDE4D	487221	transcript	XM_022415235.1	protein_coding	5	c.43-81310_43-81309insA		-1	-1	-1	-1	-1	-1	0
2	46852662	C	CT	PASS	intron_variant	MODIFIER	LOC111094478	111094478	transcript	XR_002623787.1	pseudogene	2	n.313-45239_313-45238insT		-1	-1	-1	-1	-1	-1	0
2	52048376	CCT	C	PASS	intergenic_region	MODIFIER	LOC111094656-MAST4	111094656-612904	intergenic_region	111094656-612904		-1	n.52048377_52048378delCT		-1	-1	-1	-1	-1	-1	0
2	61260548	C	T	PASS	intergenic_region	MODIFIER	LOC111092810-LOC111094665	111092810-111094665	intergenic_region	111092810-111094665		-1	n.61260548C>T		-1	-1	-1	-1	-1	-1	0
2	61400462	A	T	PASS	intergenic_region	MODIFIER	LOC111094665-LOC102155462	111094665-102155462	intergenic_region	111094665-102155462		-1	n.61400462A>T		-1	-1	-1	-1	-1	-1	0
2	63252045	T	TTTTTTTTTTTTTTTTTTTTTTAAATTTTTA	PASS	intergenic_region	MODIFIER	LOC100687819-LOC102157136	100687819-102157136	intergenic_region	100687819-102157136		-1	n.63252045_63252046insTTTTTTTTTTTTTTTTTTTTTAAATTTTTA		-1	-1	-1	-1	-1	-1	0
2	69282651	G	C	PASS	upstream_gene_variant	MODIFIER	SPOCD1	100683356	transcript	XM_022412234.1	protein_coding	-1	c.-6062G>C		-1	-1	-1	-1	-1	-1	1899
2	69282651	G	C	PASS	intron_variant	MODIFIER	SPOCD1	100683356	transcript	XM_022412227.1	protein_coding	1	c.-235-1712G>C		-1	-1	-1	-1	-1	-1	0
2	69282651	G	C	PASS	intron_variant	MODIFIER	SPOCD1	100683356	transcript	XM_022412251.1	protein_coding	1	c.-235-1712G>C		-1	-1	-1	-1	-1	-1	0
2	69282651	G	C	PASS	intron_variant	MODIFIER	SPOCD1	100683356	transcript	XM_022412277.1	protein_coding	1	c.-235-1712G>C		-1	-1	-1	-1	-1	-1	0
2	69282651	G	C	PASS	intron_variant	MODIFIER	SPOCD1	100683356	transcript	XM_022412287.1	protein_coding	1	c.-235-1712G>C		-1	-1	-1	-1	-1	-1	0
2	69282651	G	C	PASS	intron_variant	MODIFIER	SPOCD1	100683356	transcript	XM_022412270.1	protein_coding	1	c.-235-1712G>C		-1	-1	-1	-1	-1	-1	0
2	69282651	G	C	PASS	intron_variant	MODIFIER	SPOCD1	100683356	transcript	XM_022412288.1	protein_coding	1	c.-235-1712G>C		-1	-1	-1	-1	-1	-1	0
2	69282651	G	C	PASS	intron_variant	MODIFIER	SPOCD1	100683356	transcript	XM_022412230.1	protein_coding	1	c.-224-1712G>C		-1	-1	-1	-1	-1	-1	0
2	69282651	G	C	PASS	intron_variant	MODIFIER	SPOCD1	100683356	transcript	XM_022412231.1	protein_coding	2	c.-235-1712G>C		-1	-1	-1	-1	-1	-1	0
2	69282651	G	C	PASS	intron_variant	MODIFIER	SPOCD1	100683356	transcript	XM_022412236.1	protein_coding	1	c.-79-4095G>C		-1	-1	-1	-1	-1	-1	0
2	69282651	G	C	PASS	intron_variant	MODIFIER	SPOCD1	100683356	transcript	XM_022412242.1	protein_coding	1	c.-235-1712G>C		-1	-1	-1	-1	-1	-1	0
2	69282651	G	C	PASS	intron_variant	MODIFIER	SPOCD1	100683356	transcript	XM_022412247.1	protein_coding	1	c.-235-1712G>C		-1	-1	-1	-1	-1	-1	0
2	69282651	G	C	PASS	intron_variant	MODIFIER	SPOCD1	100683356	transcript	XM_022412256.1	protein_coding	1	c.-587-1712G>C		-1	-1	-1	-1	-1	-1	0
2	69282651	G	C	PASS	intron_variant	MODIFIER	SPOCD1	100683356	transcript	XM_022412264.1	protein_coding	1	c.-268-1712G>C		-1	-1	-1	-1	-1	-1	0
2	69282651	G	C	PASS	intron_variant	MODIFIER	SPOCD1	100683356	transcript	XM_022412269.1	protein_coding	1	c.-38-7507G>C		-1	-1	-1	-1	-1	-1	0
2	69282651	G	C	PASS	intron_variant	MODIFIER	SPOCD1	100683356	transcript	XM_022412286.1	protein_coding	1	c.-235-1712G>C		-1	-1	-1	-1	-1	-1	0
2	75396324	C	T	PASS	intergenic_region	MODIFIER	LOC100687018-IFNLR1	100687018-612276	intergenic_region	100687018-612276		-1	n.75396324C>T		-1	-1	-1	-1	-1	-1	0
2	79636275	C	G	PASS	upstream_gene_variant	MODIFIER	IFFO2	100688342	transcript	XM_003433754.4	protein_coding	-1	c.-411C>G		-1	-1	-1	-1	-1	-1	160
2	79636275	C	G	PASS	upstream_gene_variant	MODIFIER	IFFO2	100688342	transcript	XM_005617898.3	protein_coding	-1	c.-411C>G		-1	-1	-1	-1	-1	-1	153
2	79636275	C	G	PASS	intergenic_region	MODIFIER	UBR4-IFFO2	478211-100688342	intergenic_region	478211-100688342		-1	n.79636275C>G		-1	-1	-1	-1	-1	-1	0
2	84694508	C	CCAGCCCTCCAGCCCTCCATCCCCG	PASS	upstream_gene_variant	MODIFIER	LOC102156922	102156922	transcript	XR_001315540.2	pseudogene	-1	n.-3341_-3340insCGGGGATGGAGGGCTGGAGGGCTG		-1	-1	-1	-1	-1	-1	3341
2	84694508	C	CCAGCCCTCCAGCCCTCCATCCCCG	PASS	intergenic_region	MODIFIER	LOC102156922-LOC111094720	102156922-111094720	intergenic_region	102156922-111094720		-1	n.84694508_84694509insCAGCCCTCCAGCCCTCCATCCCCG		-1	-1	-1	-1	-1	-1	0
3	26183	CCCCTCGGGGTGGAGG	C	PASS	upstream_gene_variant	MODIFIER	REEP5	479137	transcript	XM_536283.7	protein_coding	-1	c.-439_-425delCCTCCACCCCGAGGG		-1	-1	-1	-1	-1	-1	344
3	26183	CCCCTCGGGGTGGAGG	C	PASS	intergenic_region	MODIFIER	REEP5-LOC111094958	479137-111094958	intergenic_region	479137-111094958		-1	n.26184_26198delCCCTCGGGGTGGAGG		-1	-1	-1	-1	-1	-1	0
3	206991	A	G	PASS	intergenic_region	MODIFIER	REEP5-LOC111094958	479137-111094958	intergenic_region	479137-111094958		-1	n.206991A>G		-1	-1	-1	-1	-1	-1	0
3	1259095	A	AAAG	PASS	intron_variant	MODIFIER	CAMK4	100684140	transcript	XM_022417313.1	protein_coding	2	c.241-8264_241-8263insCTT		-1	-1	-1	-1	-1	-1	0
3	1407952	AAAGAAAAAAG	A	PASS	intergenic_region	MODIFIER	CAMK4-LOC111094991	100684140-111094991	intergenic_region	100684140-111094991		-1	n.1407953_1407962delAAGAAAAAAG		-1	-1	-1	-1	-1	-1	0
3	1491988	A	ATACTCTGAAAGTCTTTTTTTTTTTTTTTTTTTTTTTTTTTTTTTTGTTTTTTTT	PASS	upstream_gene_variant	MODIFIER	LOC102155726	102155726	transcript	XR_002624586.1	pseudogene	-1	n.-3061_-3060insTACTCTGAAAGTCTTTTTTTTTTTTTTTTTTTTTTTTTTTTTTTTGTTTTTTTT		-1	-1	-1	-1	-1	-1	3060
3	1491988	A	ATACTCTGAAAGTCTTTTTTTTTTTTTTTTTTTTTTTTTTTTTTTTGTTTTTTTT	PASS	intron_variant	MODIFIER	LOC102155726	102155726	transcript	XR_002624583.1	pseudogene	4	n.756-7897_756-7896insTACTCTGAAAGTCTTTTTTTTTTTTTTTTTTTTTTTTTTTTTTTTGTTTTTTTT		-1	-1	-1	-1	-1	-1	0
3	1491988	A	ATACTCTGAAAGTCTTTTTTTTTTTTTTTTTTTTTTTTTTTTTTTTGTTTTTTTT	PASS	intron_variant	MODIFIER	WDR36	488875	transcript	XM_545992.5	protein_coding	2	c.178+86_178+87insAAAAAAAACAAAAAAAAAAAAAAAAAAAAAAAAAAAAAAAAGACTTTCAGAGTA		-1	-1	-1	-1	-1	-1	0
3	1491988	A	ATACTCTGAAAGTCTTTTTTTTTTTTTTTTTTTTTTTTTTTTTTTTGTTTTTTTT	PASS	intron_variant	MODIFIER	LOC102155726	102155726	transcript	XR_002624584.1	pseudogene	3	n.530-7897_530-7896insTACTCTGAAAGTCTTTTTTTTTTTTTTTTTTTTTTTTTTTTTTTTGTTTTTTTT		-1	-1	-1	-1	-1	-1	0
3	1491988	A	ATACTCTGAAAGTCTTTTTTTTTTTTTTTTTTTTTTTTTTTTTTTTGTTTTTTTT	PASS	intron_variant	MODIFIER	LOC102155726	102155726	transcript	XR_291743.3	pseudogene	2	n.416-3691_416-3690insTACTCTGAAAGTCTTTTTTTTTTTTTTTTTTTTTTTTTTTTTTTTGTTTTTTTT		-1	-1	-1	-1	-1	-1	0
3	1837102	ATT	A	PASS	downstream_gene_variant	MODIFIER	TMEM232	100684579	transcript	XM_022416533.1	protein_coding	-1	c.*3566_*3567delTT		-1	-1	-1	-1	-1	-1	3551
3	1837102	ATT	A	PASS	downstream_gene_variant	MODIFIER	TMEM232	100684579	transcript	XM_022416568.1	protein_coding	-1	c.*3566_*3567delTT		-1	-1	-1	-1	-1	-1	3551
3	1837102	ATT	A	PASS	downstream_gene_variant	MODIFIER	TMEM232	100684579	transcript	XM_022416534.1	protein_coding	-1	c.*3566_*3567delTT		-1	-1	-1	-1	-1	-1	3551
3	1837102	ATT	A	PASS	downstream_gene_variant	MODIFIER	TMEM232	100684579	transcript	XM_022416537.1	protein_coding	-1	c.*3566_*3567delTT		-1	-1	-1	-1	-1	-1	3551
3	1837102	ATT	A	PASS	downstream_gene_variant	MODIFIER	TMEM232	100684579	transcript	XM_022416540.1	protein_coding	-1	c.*3566_*3567delTT		-1	-1	-1	-1	-1	-1	3551
3	1837102	ATT	A	PASS	downstream_gene_variant	MODIFIER	TMEM232	100684579	transcript	XM_022416541.1	protein_coding	-1	c.*3566_*3567delTT		-1	-1	-1	-1	-1	-1	3551
3	1837102	ATT	A	PASS	downstream_gene_variant	MODIFIER	TMEM232	100684579	transcript	XM_022416553.1	protein_coding	-1	c.*3566_*3567delTT		-1	-1	-1	-1	-1	-1	3551
3	1837102	ATT	A	PASS	downstream_gene_variant	MODIFIER	TMEM232	100684579	transcript	XM_022416552.1	protein_coding	-1	c.*3566_*3567delTT		-1	-1	-1	-1	-1	-1	3551
3	1837102	ATT	A	PASS	downstream_gene_variant	MODIFIER	TMEM232	100684579	transcript	XM_022416545.1	protein_coding	-1	c.*3566_*3567delTT		-1	-1	-1	-1	-1	-1	3551
3	1837102	ATT	A	PASS	downstream_gene_variant	MODIFIER	TMEM232	100684579	transcript	XM_022416557.1	protein_coding	-1	c.*3566_*3567delTT		-1	-1	-1	-1	-1	-1	3551
3	1837102	ATT	A	PASS	intron_variant	MODIFIER	TMEM232	100684579	transcript	XR_002624619.1	pseudogene	15	n.4400+5599_4400+5600delTT		-1	-1	-1	-1	-1	-1	0
3	1837102	ATT	A	PASS	intron_variant	MODIFIER	TMEM232	100684579	transcript	XR_002624621.1	pseudogene	15	n.4399+5599_4399+5600delTT		-1	-1	-1	-1	-1	-1	0
3	1837102	ATT	A	PASS	intron_variant	MODIFIER	TMEM232	100684579	transcript	XM_022416566.1	protein_coding	15	c.1718+5599_1718+5600delTT		-1	-1	-1	-1	-1	-1	0
3	1837102	ATT	A	PASS	intron_variant	MODIFIER	TMEM232	100684579	transcript	XR_002624624.1	pseudogene	15	n.4398+5599_4398+5600delTT		-1	-1	-1	-1	-1	-1	0
3	1837102	ATT	A	PASS	intron_variant	MODIFIER	TMEM232	100684579	transcript	XR_002624622.1	pseudogene	15	n.4398+5599_4398+5600delTT		-1	-1	-1	-1	-1	-1	0
3	1837102	ATT	A	PASS	intron_variant	MODIFIER	TMEM232	100684579	transcript	XM_022416570.1	protein_coding	15	c.1718+5599_1718+5600delTT		-1	-1	-1	-1	-1	-1	0
3	1837102	ATT	A	PASS	intron_variant	MODIFIER	TMEM232	100684579	transcript	XM_022416571.1	protein_coding	15	c.1718+5599_1718+5600delTT		-1	-1	-1	-1	-1	-1	0
3	1837102	ATT	A	PASS	intron_variant	MODIFIER	TMEM232	100684579	transcript	XM_022416561.1	protein_coding	15	c.1718+5599_1718+5600delTT		-1	-1	-1	-1	-1	-1	0
3	1842514	A	G	PASS	intron_variant	MODIFIER	TMEM232	100684579	transcript	XR_002624619.1	pseudogene	15	n.4400+11010A>G		-1	-1	-1	-1	-1	-1	0
3	1842514	A	G	PASS	intron_variant	MODIFIER	TMEM232	100684579	transcript	XR_002624621.1	pseudogene	15	n.4399+11010A>G		-1	-1	-1	-1	-1	-1	0
3	1842514	A	G	PASS	intron_variant	MODIFIER	TMEM232	100684579	transcript	XM_022416566.1	protein_coding	15	c.1718+11010A>G		-1	-1	-1	-1	-1	-1	0
3	1842514	A	G	PASS	intron_variant	MODIFIER	TMEM232	100684579	transcript	XR_002624624.1	pseudogene	15	n.4398+11010A>G		-1	-1	-1	-1	-1	-1	0
3	1842514	A	G	PASS	intron_variant	MODIFIER	TMEM232	100684579	transcript	XR_002624622.1	pseudogene	15	n.4398+11010A>G		-1	-1	-1	-1	-1	-1	0
3	1842514	A	G	PASS	intron_variant	MODIFIER	TMEM232	100684579	transcript	XM_022416570.1	protein_coding	15	c.1718+11010A>G		-1	-1	-1	-1	-1	-1	0
3	1842514	A	G	PASS	intron_variant	MODIFIER	TMEM232	100684579	transcript	XM_022416571.1	protein_coding	15	c.1718+11010A>G		-1	-1	-1	-1	-1	-1	0
3	1842514	A	G	PASS	intron_variant	MODIFIER	TMEM232	100684579	transcript	XM_022416561.1	protein_coding	15	c.1718+11010A>G		-1	-1	-1	-1	-1	-1	0
3	2050078	ATATG	A	PASS	intergenic_region	MODIFIER	LOC106558507-LOC111095337	106558507-111095337	intergenic_region	106558507-111095337		-1	n.2050079_2050082delTATG		-1	-1	-1	-1	-1	-1	0
3	2261331	A	AG	PASS	upstream_gene_variant	MODIFIER	LOC111095033	111095033	transcript	XR_002624647.1	pseudogene	-1	n.-301_-300insG		-1	-1	-1	-1	-1	-1	300
3	2261331	A	AG	PASS	downstream_gene_variant	MODIFIER	LOC111095030	111095030	transcript	XR_002624645.1	pseudogene	-1	n.*4905_*4906insC		-1	-1	-1	-1	-1	-1	4905
3	2261331	A	AG	PASS	intergenic_region	MODIFIER	LOC100684652-LOC111095033	100684652-111095033	intergenic_region	100684652-111095033		-1	n.2261331_2261332insG		-1	-1	-1	-1	-1	-1	0
3	2356878	G	T	PASS	intron_variant	MODIFIER	MAN2A1	488878	transcript	XM_022416581.1	protein_coding	18	c.2832+1098C>A		-1	-1	-1	-1	-1	-1	0
3	2944011	A	ATTACATACTGTATTCCTTTTTTTTTTTTTTTTTTTTTTTTTTTTTTT	PASS	intron_variant	MODIFIER	FER	403754	transcript	NM_001003141.1	protein_coding	17	c.2048+28596_2048+28597insAAAAAAAAAAAAAAAAAAAAAAAAAAAAAAAGGAATACAGTATGTAA		-1	-1	-1	-1	-1	-1	0
3	2944011	A	ATTACATACTGTATTCCTTTTTTTTTTTTTTTTTTTTTTTTTTTTTTT	PASS	intron_variant	MODIFIER	FER	403754	transcript	XM_022415886.1	protein_coding	8	c.941+28596_941+28597insAAAAAAAAAAAAAAAAAAAAAAAAAAAAAAAGGAATACAGTATGTAA		-1	-1	-1	-1	-1	-1	0
3	2944011	A	ATTACATACTGTATTCCTTTTTTTTTTTTTTTTTTTTTTTTTTTTTTT	PASS	intron_variant	MODIFIER	FER	403754	transcript	XM_022415881.1	protein_coding	9	c.1052+28596_1052+28597insAAAAAAAAAAAAAAAAAAAAAAAAAAAAAAAGGAATACAGTATGTAA		-1	-1	-1	-1	-1	-1	0
3	2944011	A	ATTACATACTGTATTCCTTTTTTTTTTTTTTTTTTTTTTTTTTTTTTT	PASS	intron_variant	MODIFIER	FER	403754	transcript	XM_022415875.1	protein_coding	10	c.1085+28596_1085+28597insAAAAAAAAAAAAAAAAAAAAAAAAAAAAAAAGGAATACAGTATGTAA		-1	-1	-1	-1	-1	-1	0
3	2944011	A	ATTACATACTGTATTCCTTTTTTTTTTTTTTTTTTTTTTTTTTTTTTT	PASS	intron_variant	MODIFIER	FER	403754	transcript	XM_022415869.1	protein_coding	10	c.1139+28596_1139+28597insAAAAAAAAAAAAAAAAAAAAAAAAAAAAAAAGGAATACAGTATGTAA		-1	-1	-1	-1	-1	-1	0
3	2944011	A	ATTACATACTGTATTCCTTTTTTTTTTTTTTTTTTTTTTTTTTTTTTT	PASS	intron_variant	MODIFIER	FER	403754	transcript	XM_022415866.1	protein_coding	14	c.1523+28596_1523+28597insAAAAAAAAAAAAAAAAAAAAAAAAAAAAAAAGGAATACAGTATGTAA		-1	-1	-1	-1	-1	-1	0
3	2944011	A	ATTACATACTGTATTCCTTTTTTTTTTTTTTTTTTTTTTTTTTTTTTT	PASS	intron_variant	MODIFIER	FER	403754	transcript	XM_022415859.1	protein_coding	16	c.1844+28596_1844+28597insAAAAAAAAAAAAAAAAAAAAAAAAAAAAAAAGGAATACAGTATGTAA		-1	-1	-1	-1	-1	-1	0
3	2944011	A	ATTACATACTGTATTCCTTTTTTTTTTTTTTTTTTTTTTTTTTTTTTT	PASS	intron_variant	MODIFIER	FER	403754	transcript	XM_022415832.1	protein_coding	16	c.2048+28596_2048+28597insAAAAAAAAAAAAAAAAAAAAAAAAAAAAAAAGGAATACAGTATGTAA		-1	-1	-1	-1	-1	-1	0
3	2944011	A	ATTACATACTGTATTCCTTTTTTTTTTTTTTTTTTTTTTTTTTTTTTT	PASS	intron_variant	MODIFIER	FER	403754	transcript	XM_022415835.1	protein_coding	16	c.2048+28596_2048+28597insAAAAAAAAAAAAAAAAAAAAAAAAAAAAAAAGGAATACAGTATGTAA		-1	-1	-1	-1	-1	-1	0
3	2944011	A	ATTACATACTGTATTCCTTTTTTTTTTTTTTTTTTTTTTTTTTTTTTT	PASS	intron_variant	MODIFIER	FER	403754	transcript	XM_022415858.1	protein_coding	16	c.1856+28596_1856+28597insAAAAAAAAAAAAAAAAAAAAAAAAAAAAAAAGGAATACAGTATGTAA		-1	-1	-1	-1	-1	-1	0
3	2944011	A	ATTACATACTGTATTCCTTTTTTTTTTTTTTTTTTTTTTTTTTTTTTT	PASS	intron_variant	MODIFIER	FER	403754	transcript	XM_022415843.1	protein_coding	16	c.1991+28596_1991+28597insAAAAAAAAAAAAAAAAAAAAAAAAAAAAAAAGGAATACAGTATGTAA		-1	-1	-1	-1	-1	-1	0
3	2944011	A	ATTACATACTGTATTCCTTTTTTTTTTTTTTTTTTTTTTTTTTTTTTT	PASS	intron_variant	MODIFIER	FER	403754	transcript	XM_022415851.1	protein_coding	16	c.1925+28596_1925+28597insAAAAAAAAAAAAAAAAAAAAAAAAAAAAAAAGGAATACAGTATGTAA		-1	-1	-1	-1	-1	-1	0
3	2944011	A	ATTACATACTGTATTCCTTTTTTTTTTTTTTTTTTTTTTTTTTTTTTT	PASS	intron_variant	MODIFIER	FER	403754	transcript	XM_022415862.1	protein_coding	17	c.2048+28596_2048+28597insAAAAAAAAAAAAAAAAAAAAAAAAAAAAAAAGGAATACAGTATGTAA		-1	-1	-1	-1	-1	-1	0
3	3512648	C	CA	PASS	intron_variant	MODIFIER	LOC111095048	111095048	transcript	XR_002624685.1	pseudogene	1	n.143-3270_143-3269insT		-1	-1	-1	-1	-1	-1	0
3	3644478	G	A	PASS	intron_variant	MODIFIER	FBXL17	608166	transcript	XM_014111633.1	protein_coding	4	c.741+2412G>A		-1	-1	-1	-1	-1	-1	0
3	3644480	T	C	PASS	intron_variant	MODIFIER	FBXL17	608166	transcript	XM_014111633.1	protein_coding	4	c.741+2414T>C		-1	-1	-1	-1	-1	-1	0
3	3715973	C	T	PASS	intron_variant	MODIFIER	FBXL17	608166	transcript	XM_014111633.1	protein_coding	4	c.742-34092C>T		-1	-1	-1	-1	-1	-1	0
3	3742604	A	G	PASS	intron_variant	MODIFIER	FBXL17	608166	transcript	XM_014111633.1	protein_coding	4	c.742-7461A>G		-1	-1	-1	-1	-1	-1	0
3	3915718	C	T	PASS	intron_variant	MODIFIER	FBXL17	608166	transcript	XM_014111633.1	protein_coding	6	c.981-12090C>T		-1	-1	-1	-1	-1	-1	0
3	3915723	CGGGCTGT	C	PASS	intron_variant	MODIFIER	FBXL17	608166	transcript	XM_014111633.1	protein_coding	6	c.981-12084_981-12078delGGGCTGT		-1	-1	-1	-1	-1	-1	0
3	4527860	C	CT	PASS	intron_variant	MODIFIER	EFNA5	608458	transcript	XM_845489.5	protein_coding	2	c.419-7984_419-7983insT		-1	-1	-1	-1	-1	-1	0
3	4527860	C	CT	PASS	intron_variant	MODIFIER	EFNA5	608458	transcript	XM_005618039.3	protein_coding	2	c.419-7984_419-7983insT		-1	-1	-1	-1	-1	-1	0
3	5125307	G	GCCA	PASS	intergenic_region	MODIFIER	LOC111095064-LOC102156684	111095064-102156684	intergenic_region	111095064-102156684		-1	n.5125307_5125308insCCA		-1	-1	-1	-1	-1	-1	0
3	5125308	G	T	PASS	intergenic_region	MODIFIER	LOC111095064-LOC102156684	111095064-102156684	intergenic_region	111095064-102156684		-1	n.5125308G>T		-1	-1	-1	-1	-1	-1	0
3	10071578	C	A	PASS	intergenic_region	MODIFIER	FAM174A-LOC111095336	608799-111095336	intergenic_region	608799-111095336		-1	n.10071578C>A		-1	-1	-1	-1	-1	-1	0
3	12275036	G	A	PASS	intergenic_region	MODIFIER	LOC100687310-LOC111095123	100687310-111095123	intergenic_region	100687310-111095123		-1	n.12275036G>A		-1	-1	-1	-1	-1	-1	0
3	23232689	A	C	PASS	intergenic_region	MODIFIER	LOC111095352-EDIL3	111095352-488919	intergenic_region	111095352-488919		-1	n.23232689A>C		-1	-1	-1	-1	-1	-1	0
3	24236335	C	CCCTCCCCT	PASS	intron_variant	MODIFIER	VCAN	488922	transcript	XM_003434417.4	protein_coding	1	c.-7+2372_-7+2373insAGGGGAGG		-1	-1	-1	-1	-1	-1	0
3	26259631	A	ATAATAATAACAGTAACAGTGTTCCACTTTCTAGTTCATAATTAATGTCATCT	PASS	intron_variant	MODIFIER	RASGRF2	610203	transcript	XM_014111758.2	protein_coding	1	c.285+26903_285+26904insAGATGACATTAATTATGAACTAGAAAGTGGAACACTGTTACTGTTATTATTA		-1	-1	-1	-1	-1	-1	0
3	26259631	A	ATAATAATAACAGTAACAGTGTTCCACTTTCTAGTTCATAATTAATGTCATCT	PASS	intron_variant	MODIFIER	RASGRF2	610203	transcript	XM_022416755.1	protein_coding	1	c.285+26903_285+26904insAGATGACATTAATTATGAACTAGAAAGTGGAACACTGTTACTGTTATTATTA		-1	-1	-1	-1	-1	-1	0
3	31525890	T	C	PASS	intergenic_region	MODIFIER	LOC100856780-COR6C40	100856780-488678	intergenic_region	100856780-488678		-1	n.31525890T>C		-1	-1	-1	-1	-1	-1	0
3	31525969	T	G	PASS	intergenic_region	MODIFIER	LOC100856780-COR6C40	100856780-488678	intergenic_region	100856780-488678		-1	n.31525969T>G		-1	-1	-1	-1	-1	-1	0
3	32085660	T	G	PASS	intron_variant	MODIFIER	NIPA2	479002	transcript	XM_005618207.3	protein_coding	5	c.448+2298T>G		-1	-1	-1	-1	-1	-1	0
3	32085660	T	G	PASS	intron_variant	MODIFIER	NIPA2	479002	transcript	XM_022416803.1	protein_coding	5	c.448+2298T>G		-1	-1	-1	-1	-1	-1	0
3	32085660	T	G	PASS	intron_variant	MODIFIER	NIPA2	479002	transcript	XM_014112285.2	protein_coding	6	c.448+2298T>G		-1	-1	-1	-1	-1	-1	0
3	32085660	T	G	PASS	intron_variant	MODIFIER	NIPA2	479002	transcript	XM_536157.6	protein_coding	4	c.391+2298T>G		-1	-1	-1	-1	-1	-1	0
3	32193937	A	C	PASS	intron_variant	MODIFIER	LOC111095176	111095176	transcript	XM_022416804.1	protein_coding	1	c.*70+21698T>G		-1	-1	-1	-1	-1	-1	0
3	34774922	TTTGC	T	PASS	intergenic_region	MODIFIER	LOC100685269-LOC111095356	100685269-111095356	intergenic_region	100685269-111095356		-1	n.34774923_34774926delTTGC		-1	-1	-1	-1	-1	-1	0
3	35447251	TTCCTTTTC	T	PASS	downstream_gene_variant	MODIFIER	UBE3A	479010	transcript	XM_005618230.3	protein_coding	-1	c.*7004_*7011delTCCTTTTC		-1	-1	-1	-1	-1	-1	4923
3	35447251	TTCCTTTTC	T	PASS	downstream_gene_variant	MODIFIER	UBE3A	479010	transcript	XM_014112299.2	protein_coding	-1	c.*7004_*7011delTCCTTTTC		-1	-1	-1	-1	-1	-1	4923
3	35447251	TTCCTTTTC	T	PASS	downstream_gene_variant	MODIFIER	UBE3A	479010	transcript	XM_022416813.1	protein_coding	-1	c.*7004_*7011delTCCTTTTC		-1	-1	-1	-1	-1	-1	4923
3	35447251	TTCCTTTTC	T	PASS	downstream_gene_variant	MODIFIER	UBE3A	479010	transcript	XM_022416814.1	protein_coding	-1	c.*7004_*7011delTCCTTTTC		-1	-1	-1	-1	-1	-1	4923
3	35447251	TTCCTTTTC	T	PASS	downstream_gene_variant	MODIFIER	UBE3A	479010	transcript	XM_022416815.1	protein_coding	-1	c.*7004_*7011delTCCTTTTC		-1	-1	-1	-1	-1	-1	4923
3	35447251	TTCCTTTTC	T	PASS	downstream_gene_variant	MODIFIER	UBE3A	479010	transcript	XM_014112300.2	protein_coding	-1	c.*7004_*7011delTCCTTTTC		-1	-1	-1	-1	-1	-1	4923
3	35447251	TTCCTTTTC	T	PASS	downstream_gene_variant	MODIFIER	UBE3A	479010	transcript	XM_005618234.3	protein_coding	-1	c.*7004_*7011delTCCTTTTC		-1	-1	-1	-1	-1	-1	4923
3	35447251	TTCCTTTTC	T	PASS	downstream_gene_variant	MODIFIER	UBE3A	479010	transcript	XM_005618232.3	protein_coding	-1	c.*7004_*7011delTCCTTTTC		-1	-1	-1	-1	-1	-1	4923
3	35447251	TTCCTTTTC	T	PASS	downstream_gene_variant	MODIFIER	UBE3A	479010	transcript	XM_022416816.1	protein_coding	-1	c.*7004_*7011delTCCTTTTC		-1	-1	-1	-1	-1	-1	4923
3	35447251	TTCCTTTTC	T	PASS	intergenic_region	MODIFIER	UBE3A-LOC100685501	479010-100685501	intergenic_region	479010-100685501		-1	n.35447252_35447259delTCCTTTTC		-1	-1	-1	-1	-1	-1	0
3	36098957	CT	C	PASS	intron_variant	MODIFIER	LOC111095183	111095183	transcript	XR_002625014.1	pseudogene	2	n.464-12983delA		-1	-1	-1	-1	-1	-1	0
3	36098961	CTTT	C	PASS	intron_variant	MODIFIER	LOC111095183	111095183	transcript	XR_002625014.1	pseudogene	2	n.464-12989_464-12987delAAA		-1	-1	-1	-1	-1	-1	0
3	42981156	T	TTCCCTTCCCC	PASS	intergenic_region	MODIFIER	LOC111095364-LOC111095365	111095364-111095365	intergenic_region	111095364-111095365		-1	n.42981156_42981157insTCCCTTCCCC		-1	-1	-1	-1	-1	-1	0
3	42981171	C	T	PASS	intergenic_region	MODIFIER	LOC111095364-LOC111095365	111095364-111095365	intergenic_region	111095364-111095365		-1	n.42981171C>T		-1	-1	-1	-1	-1	-1	0
3	49724968	T	C	PASS	intron_variant	MODIFIER	AGBL1	479034	transcript	XM_005618341.3	protein_coding	5	c.488+21258T>C		-1	-1	-1	-1	-1	-1	0
3	49724968	T	C	PASS	intron_variant	MODIFIER	AGBL1	479034	transcript	XM_005618342.2	protein_coding	5	c.488+21258T>C		-1	-1	-1	-1	-1	-1	0
3	49724968	T	C	PASS	intron_variant	MODIFIER	AGBL1	479034	transcript	XM_536184.5	protein_coding	5	c.488+21258T>C		-1	-1	-1	-1	-1	-1	0
3	51086212	G	GAAATGCTTAGGCAAAGCTCTAGATTGA	PASS	intergenic_region	MODIFIER	LOC111095217-LOC106558616	111095217-106558616	intergenic_region	111095217-106558616		-1	n.51086212_51086213insAAATGCTTAGGCAAAGCTCTAGATTGA		-1	-1	-1	-1	-1	-1	0
3	62867284	CATTGAGAGCATCAAA	C	PASS	intron_variant	MODIFIER	FAM184B	479080	transcript	XM_022417145.1	protein_coding	10	c.2991+2572_2991+2586delATTGAGAGCATCAAA		-1	-1	-1	-1	-1	-1	0
3	62867284	CATTGAGAGCATCAAA	C	PASS	intron_variant	MODIFIER	FAM184B	479080	transcript	XR_002625259.1	pseudogene	10	n.3102+2572_3102+2586delATTGAGAGCATCAAA		-1	-1	-1	-1	-1	-1	0
3	62867284	CATTGAGAGCATCAAA	C	PASS	intron_variant	MODIFIER	FAM184B	479080	transcript	XM_005618541.3	protein_coding	10	c.2991+2572_2991+2586delATTGAGAGCATCAAA		-1	-1	-1	-1	-1	-1	0
3	62867284	CATTGAGAGCATCAAA	C	PASS	intron_variant	MODIFIER	FAM184B	479080	transcript	XR_291904.3	pseudogene	10	n.3101+2572_3101+2586delATTGAGAGCATCAAA		-1	-1	-1	-1	-1	-1	0
3	62867284	CATTGAGAGCATCAAA	C	PASS	intron_variant	MODIFIER	FAM184B	479080	transcript	XM_536227.6	protein_coding	10	c.2049+2572_2049+2586delATTGAGAGCATCAAA		-1	-1	-1	-1	-1	-1	0
3	65153753	C	CACCCCCCCCCACCCCCACCCCA	PASS	intron_variant	MODIFIER	LOC111095263	111095263	transcript	XR_002625266.1	pseudogene	2	n.207-3597_207-3596insTGGGGTGGGGGTGGGGGGGGGT		-1	-1	-1	-1	-1	-1	0
3	72439611	G	GCGCGA	PASS	upstream_gene_variant	MODIFIER	N4BP2	479101	transcript	XM_022417211.1	protein_coding	-1	c.-27089_-27088insTCGCG		-1	-1	-1	-1	-1	-1	415
3	72439611	G	GCGCGA	PASS	upstream_gene_variant	MODIFIER	N4BP2	479101	transcript	XM_022417218.1	protein_coding	-1	c.-27089_-27088insTCGCG		-1	-1	-1	-1	-1	-1	412
3	72439611	G	GCGCGA	PASS	upstream_gene_variant	MODIFIER	N4BP2	479101	transcript	XM_022417221.1	protein_coding	-1	c.-31177_-31176insTCGCG		-1	-1	-1	-1	-1	-1	423
3	72439611	G	GCGCGA	PASS	upstream_gene_variant	MODIFIER	N4BP2	479101	transcript	XM_022417222.1	protein_coding	-1	c.-31177_-31176insTCGCG		-1	-1	-1	-1	-1	-1	423
3	72439611	G	GCGCGA	PASS	upstream_gene_variant	MODIFIER	N4BP2	479101	transcript	XM_022417223.1	protein_coding	-1	c.-31177_-31176insTCGCG		-1	-1	-1	-1	-1	-1	423
3	72439611	G	GCGCGA	PASS	upstream_gene_variant	MODIFIER	N4BP2	479101	transcript	XM_022417212.1	protein_coding	-1	c.-27089_-27088insTCGCG		-1	-1	-1	-1	-1	-1	415
3	72439611	G	GCGCGA	PASS	upstream_gene_variant	MODIFIER	N4BP2	479101	transcript	XM_022417214.1	protein_coding	-1	c.-27089_-27088insTCGCG		-1	-1	-1	-1	-1	-1	415
3	72439611	G	GCGCGA	PASS	upstream_gene_variant	MODIFIER	N4BP2	479101	transcript	XM_022417215.1	protein_coding	-1	c.-27089_-27088insTCGCG		-1	-1	-1	-1	-1	-1	415
3	72439611	G	GCGCGA	PASS	upstream_gene_variant	MODIFIER	N4BP2	479101	transcript	XM_022417216.1	protein_coding	-1	c.-27089_-27088insTCGCG		-1	-1	-1	-1	-1	-1	19
3	72439611	G	GCGCGA	PASS	upstream_gene_variant	MODIFIER	N4BP2	479101	transcript	XM_022417217.1	protein_coding	-1	c.-27089_-27088insTCGCG		-1	-1	-1	-1	-1	-1	19
3	72439611	G	GCGCGA	PASS	upstream_gene_variant	MODIFIER	N4BP2	479101	transcript	XR_002625326.1	pseudogene	-1	n.-403_-402insTCGCG		-1	-1	-1	-1	-1	-1	403
3	72439611	G	GCGCGA	PASS	upstream_gene_variant	MODIFIER	N4BP2	479101	transcript	XM_022417225.1	protein_coding	-1	c.-27089_-27088insTCGCG		-1	-1	-1	-1	-1	-1	394
3	72439611	G	GCGCGA	PASS	intergenic_region	MODIFIER	N4BP2-TRNAK-CUU	479101-111095413	intergenic_region	479101-111095413		-1	n.72439611_72439612insCGCGA		-1	-1	-1	-1	-1	-1	0
3	72458247	T	TCTCTCATCCCATATCCTCA	PASS	intergenic_region	MODIFIER	N4BP2-TRNAK-CUU	479101-111095413	intergenic_region	479101-111095413		-1	n.72458247_72458248insCTCTCATCCCATATCCTCA		-1	-1	-1	-1	-1	-1	0
3	72458249	T	TCTAC	PASS	intergenic_region	MODIFIER	N4BP2-TRNAK-CUU	479101-111095413	intergenic_region	479101-111095413		-1	n.72458249_72458250insCTAC		-1	-1	-1	-1	-1	-1	0
3	72458251	T	A	PASS	intergenic_region	MODIFIER	N4BP2-TRNAK-CUU	479101-111095413	intergenic_region	479101-111095413		-1	n.72458251T>A		-1	-1	-1	-1	-1	-1	0
3	73036785	T	A	PASS	upstream_gene_variant	MODIFIER	KLB	479110	transcript	XM_536257.6	protein_coding	-1	c.-3330A>T		-1	-1	-1	-1	-1	-1	3219
3	73036785	T	A	PASS	intergenic_region	MODIFIER	KLB-RFC1	479110-479112	intergenic_region	479110-479112		-1	n.73036785T>A		-1	-1	-1	-1	-1	-1	0
3	76987833	G	A	PASS	intergenic_region	MODIFIER	LOC111095391-LOC111095392	111095391-111095392	intergenic_region	111095391-111095392		-1	n.76987833G>A		-1	-1	-1	-1	-1	-1	0
3	77439538	T	TAATA	PASS	intergenic_region	MODIFIER	LOC111095392-LOC102153121	111095392-102153121	intergenic_region	111095392-102153121		-1	n.77439538_77439539insAATA		-1	-1	-1	-1	-1	-1	0
3	77439539	G	A	PASS	intergenic_region	MODIFIER	LOC111095392-LOC102153121	111095392-102153121	intergenic_region	111095392-102153121		-1	n.77439539G>A		-1	-1	-1	-1	-1	-1	0
3	78060754	A	AT	PASS	intron_variant	MODIFIER	LOC111095393	111095393	transcript	XR_002625488.1	pseudogene	2	n.239-1055_239-1054insA		-1	-1	-1	-1	-1	-1	0
3	78060754	A	AT	PASS	intron_variant	MODIFIER	LOC111095393	111095393	transcript	XR_002625487.1	pseudogene	2	n.238+1574_238+1575insA		-1	-1	-1	-1	-1	-1	0
3	83120273	TTC	T	PASS	intergenic_region	MODIFIER	LOC111095399-LOC111095304	111095399-111095304	intergenic_region	111095399-111095304		-1	n.83120274_83120275delTC		-1	-1	-1	-1	-1	-1	0
3	83120287	CTTTCTTTCTTTCTTTCTTCTTTCTTTCTTTCTTTCCTTCCTTCCTTCCTTCCTTCCTTCCTTCCTTCCTTCTTTCTTTCTTTCTTTCTTTCTTTCTTTCTTTCTTTCTTTCTTTCCTTCCTTCCTTCCTTCCTTCCTTCCTTCCTTCTTTCT	C	PASS	intergenic_region	MODIFIER	LOC111095399-LOC111095304	111095399-111095304	intergenic_region	111095399-111095304		-1	n.83120288_83120439del		-1	-1	-1	-1	-1	-1	0
3	83358670	AAAG	A	PASS	intron_variant	MODIFIER	LOC111095306	111095306	transcript	XR_002625373.1	pseudogene	5	n.1012+636_1012+638delCTT		-1	-1	-1	-1	-1	-1	0
3	83358670	AAAG	A	PASS	intron_variant	MODIFIER	LOC111095306	111095306	transcript	XR_002625372.1	pseudogene	5	n.517+636_517+638delCTT		-1	-1	-1	-1	-1	-1	0
3	83358670	AAAG	A	PASS	intron_variant	MODIFIER	LOC111095306	111095306	transcript	XR_002625375.1	pseudogene	5	n.517+636_517+638delCTT		-1	-1	-1	-1	-1	-1	0
3	83358670	AAAG	A	PASS	intron_variant	MODIFIER	LOC111095306	111095306	transcript	XR_002625376.1	pseudogene	4	n.427-1220_427-1218delCTT		-1	-1	-1	-1	-1	-1	0
3	83358670	AAAG	A	PASS	intron_variant	MODIFIER	LOC111095306	111095306	transcript	XR_002625374.1	pseudogene	4	n.447+636_447+638delCTT		-1	-1	-1	-1	-1	-1	0
3	83358670	AAAG	A	PASS	intron_variant	MODIFIER	LOC111095306	111095306	transcript	XR_002625377.1	pseudogene	4	n.427-2952_427-2950delCTT		-1	-1	-1	-1	-1	-1	0
3	83358670	AAAG	A	PASS	intron_variant	MODIFIER	LOC111095306	111095306	transcript	XR_002625378.1	pseudogene	3	n.341-1220_341-1218delCTT		-1	-1	-1	-1	-1	-1	0
3	83358670	AAAG	A	PASS	intron_variant	MODIFIER	LOC111095306	111095306	transcript	XR_002625379.1	pseudogene	3	n.341-2952_341-2950delCTT		-1	-1	-1	-1	-1	-1	0
3	87557694	TCCCATCCTATGGATTCTTTTTTTTTTTTTTTTTAAAGATTTTATTTATTTATTCATGATAGTCACAGAGAGAGAGAGAGAGAGAGGCAGAGACACAGGCAGAGGGAGAAGCAGGCTCCATGCACCGGGAGCCCGACGTGGGATCCGATCCCGGGTCTCCAGGATCGCGCCCTGGGCCAAAGGCAGGCGCCAAACCGCTGCGCCACCCAGGGATC	T	PASS	downstream_gene_variant	MODIFIER	LOC111095319	111095319	transcript	XR_002625406.1	pseudogene	-1	n.*1830_*2043del		-1	-1	-1	-1	-1	-1	2043
3	87557694	TCCCATCCTATGGATTCTTTTTTTTTTTTTTTTTAAAGATTTTATTTATTTATTCATGATAGTCACAGAGAGAGAGAGAGAGAGAGGCAGAGACACAGGCAGAGGGAGAAGCAGGCTCCATGCACCGGGAGCCCGACGTGGGATCCGATCCCGGGTCTCCAGGATCGCGCCCTGGGCCAAAGGCAGGCGCCAAACCGCTGCGCCACCCAGGGATC	T	PASS	downstream_gene_variant	MODIFIER	LOC111095319	111095319	transcript	XR_002625407.1	pseudogene	-1	n.*1830_*2043del		-1	-1	-1	-1	-1	-1	2043
3	87557694	TCCCATCCTATGGATTCTTTTTTTTTTTTTTTTTAAAGATTTTATTTATTTATTCATGATAGTCACAGAGAGAGAGAGAGAGAGAGGCAGAGACACAGGCAGAGGGAGAAGCAGGCTCCATGCACCGGGAGCCCGACGTGGGATCCGATCCCGGGTCTCCAGGATCGCGCCCTGGGCCAAAGGCAGGCGCCAAACCGCTGCGCCACCCAGGGATC	T	PASS	downstream_gene_variant	MODIFIER	LOC111095319	111095319	transcript	XR_002625408.1	pseudogene	-1	n.*1830_*2043del		-1	-1	-1	-1	-1	-1	2043
3	87557694	TCCCATCCTATGGATTCTTTTTTTTTTTTTTTTTAAAGATTTTATTTATTTATTCATGATAGTCACAGAGAGAGAGAGAGAGAGAGGCAGAGACACAGGCAGAGGGAGAAGCAGGCTCCATGCACCGGGAGCCCGACGTGGGATCCGATCCCGGGTCTCCAGGATCGCGCCCTGGGCCAAAGGCAGGCGCCAAACCGCTGCGCCACCCAGGGATC	T	PASS	downstream_gene_variant	MODIFIER	LOC111095319	111095319	transcript	XR_002625409.1	pseudogene	-1	n.*1830_*2043del		-1	-1	-1	-1	-1	-1	2043
3	87557694	TCCCATCCTATGGATTCTTTTTTTTTTTTTTTTTAAAGATTTTATTTATTTATTCATGATAGTCACAGAGAGAGAGAGAGAGAGAGGCAGAGACACAGGCAGAGGGAGAAGCAGGCTCCATGCACCGGGAGCCCGACGTGGGATCCGATCCCGGGTCTCCAGGATCGCGCCCTGGGCCAAAGGCAGGCGCCAAACCGCTGCGCCACCCAGGGATC	T	PASS	downstream_gene_variant	MODIFIER	LOC111095319	111095319	transcript	XR_002625410.1	pseudogene	-1	n.*1830_*2043del		-1	-1	-1	-1	-1	-1	2043
3	87557694	TCCCATCCTATGGATTCTTTTTTTTTTTTTTTTTAAAGATTTTATTTATTTATTCATGATAGTCACAGAGAGAGAGAGAGAGAGAGGCAGAGACACAGGCAGAGGGAGAAGCAGGCTCCATGCACCGGGAGCCCGACGTGGGATCCGATCCCGGGTCTCCAGGATCGCGCCCTGGGCCAAAGGCAGGCGCCAAACCGCTGCGCCACCCAGGGATC	T	PASS	intergenic_region	MODIFIER	LOC106558646-LOC111095319	106558646-111095319	intergenic_region	106558646-111095319		-1	n.87557695_87557908del		-1	-1	-1	-1	-1	-1	0
3	88917876	C	T	PASS	upstream_gene_variant	MODIFIER	PACRGL	479130	transcript	XM_014112665.2	protein_coding	-1	c.-3710G>A		-1	-1	-1	-1	-1	-1	1039
3	88917876	C	T	PASS	upstream_gene_variant	MODIFIER	PACRGL	479130	transcript	XM_022417272.1	protein_coding	-1	c.-3710G>A		-1	-1	-1	-1	-1	-1	1039
3	88917876	C	T	PASS	intron_variant	MODIFIER	PACRGL	479130	transcript	XM_014112667.2	protein_coding	1	c.-413+261G>A		-1	-1	-1	-1	-1	-1	0
3	88917876	C	T	PASS	intron_variant	MODIFIER	PACRGL	479130	transcript	XM_022417273.1	protein_coding	1	c.-404+261G>A		-1	-1	-1	-1	-1	-1	0
3	88917876	C	T	PASS	intron_variant	MODIFIER	PACRGL	479130	transcript	XM_022417274.1	protein_coding	1	c.-290+232G>A		-1	-1	-1	-1	-1	-1	0
3	88917876	C	T	PASS	intron_variant	MODIFIER	PACRGL	479130	transcript	XM_014112666.2	protein_coding	1	c.-404+232G>A		-1	-1	-1	-1	-1	-1	0
3	88917876	C	T	PASS	intron_variant	MODIFIER	PACRGL	479130	transcript	XM_536276.6	protein_coding	1	c.-413+232G>A		-1	-1	-1	-1	-1	-1	0
3	88917876	C	T	PASS	intron_variant	MODIFIER	PACRGL	479130	transcript	XM_005618663.3	protein_coding	1	c.-413+232G>A		-1	-1	-1	-1	-1	-1	0
3	88917876	C	T	PASS	intron_variant	MODIFIER	PACRGL	479130	transcript	XM_014112670.2	protein_coding	1	c.-413+232G>A		-1	-1	-1	-1	-1	-1	0
3	88917876	C	T	PASS	intron_variant	MODIFIER	PACRGL	479130	transcript	XM_022417275.1	protein_coding	1	c.-413+232G>A		-1	-1	-1	-1	-1	-1	0
3	88917876	C	T	PASS	intron_variant	MODIFIER	PACRGL	479130	transcript	XM_014112669.2	protein_coding	1	c.-413+232G>A		-1	-1	-1	-1	-1	-1	0
3	91333845	C	T	PASS	3_prime_UTR_variant	MODIFIER	DCAF16	102156727	transcript	XM_014112676.2	protein_coding	2	c.*693C>T		-1	-1	-1	-1	-1	-1	693
3	91333845	C	T	PASS	3_prime_UTR_variant	MODIFIER	DCAF16	102156727	transcript	XM_022417279.1	protein_coding	2	c.*693C>T		-1	-1	-1	-1	-1	-1	693
3	91333845	C	T	PASS	3_prime_UTR_variant	MODIFIER	DCAF16	102156727	transcript	XM_022417280.1	protein_coding	3	c.*693C>T		-1	-1	-1	-1	-1	-1	693
3	91333845	C	T	PASS	3_prime_UTR_variant	MODIFIER	DCAF16	102156727	transcript	XM_022417281.1	protein_coding	2	c.*693C>T		-1	-1	-1	-1	-1	-1	693
3	91333845	C	T	PASS	intron_variant	MODIFIER	DCAF16	102156727	transcript	XR_291950.3	pseudogene	2	n.3937+1601C>T		-1	-1	-1	-1	-1	-1	0
3	91888944	GAAAC	G	PASS	upstream_gene_variant	MODIFIER	LOC102154042	102154042	transcript	XM_022417310.1	protein_coding	-1	c.-2579_-2576delGTTT		-1	-1	-1	-1	-1	-1	2533
3	91888944	GAAAC	G	PASS	upstream_gene_variant	MODIFIER	LOC102154042	102154042	transcript	XM_022417311.1	protein_coding	-1	c.-2639_-2636delGTTT		-1	-1	-1	-1	-1	-1	532
3	91888944	GAAAC	G	PASS	downstream_gene_variant	MODIFIER	MIR8899	104797406	transcript	NR_128870.1	pseudogene	-1	n.*1869_*1872delAAAC		-1	-1	-1	-1	-1	-1	1869
3	91888944	GAAAC	G	PASS	downstream_gene_variant	MODIFIER	MIR8899	104797406	transcript	TRANSCRIPT_104797406	pseudogene	-1	n.*1937_*1940delAAAC		-1	-1	-1	-1	-1	-1	1937
3	91888944	GAAAC	G	PASS	intergenic_region	MODIFIER	LOC102154042-CHR_END	102154042-CHR_END	intergenic_region	102154042-CHR_END		-1	n.91888945_91888948delAAAC		-1	-1	-1	-1	-1	-1	0
3	91888995	GCCAAACA	G	PASS	upstream_gene_variant	MODIFIER	LOC102154042	102154042	transcript	XM_022417310.1	protein_coding	-1	c.-2633_-2627delTGTTTGG		-1	-1	-1	-1	-1	-1	2584
3	91888995	GCCAAACA	G	PASS	upstream_gene_variant	MODIFIER	LOC102154042	102154042	transcript	XM_022417311.1	protein_coding	-1	c.-2693_-2687delTGTTTGG		-1	-1	-1	-1	-1	-1	583
3	91888995	GCCAAACA	G	PASS	downstream_gene_variant	MODIFIER	MIR8899	104797406	transcript	NR_128870.1	pseudogene	-1	n.*1920_*1926delCCAAACA		-1	-1	-1	-1	-1	-1	1920
3	91888995	GCCAAACA	G	PASS	downstream_gene_variant	MODIFIER	MIR8899	104797406	transcript	TRANSCRIPT_104797406	pseudogene	-1	n.*1988_*1994delCCAAACA		-1	-1	-1	-1	-1	-1	1988
3	91888995	GCCAAACA	G	PASS	intergenic_region	MODIFIER	LOC102154042-CHR_END	102154042-CHR_END	intergenic_region	102154042-CHR_END		-1	n.91888996_91889002delCCAAACA		-1	-1	-1	-1	-1	-1	0
4	1227619	A	G	PASS	intergenic_region	MODIFIER	LOC100855447-LOC111095680	100855447-111095680	intergenic_region	100855447-111095680		-1	n.1227619A>G		-1	-1	-1	-1	-1	-1	0
4	7709214	TTAAATGTTTTATTTATTTATTTTTTTTTTAATTTTTTTTATTTATTTATGATAGTCACAGAGAGAGAGAGAGAGAGAGAGAGAGAGAGAGGCAGAGACACAGGCAGAGGGAGAAGCAGGCTCCATGCACCGGGAGCCCGATGTGGGATTCGATCCCGGGTCTCCAGGATCGCGCCCTGGGCCAAAGGCAGGCGCCAAACCGCTGCGCCACCCAGGGATCCC	T	PASS	intron_variant	MODIFIER	DISC1	488970	transcript	XM_546088.6	protein_coding	8	c.1954+8442_1954+8662del		-1	-1	-1	-1	-1	-1	0
4	7709214	TTAAATGTTTTATTTATTTATTTTTTTTTTAATTTTTTTTATTTATTTATGATAGTCACAGAGAGAGAGAGAGAGAGAGAGAGAGAGAGAGGCAGAGACACAGGCAGAGGGAGAAGCAGGCTCCATGCACCGGGAGCCCGATGTGGGATTCGATCCCGGGTCTCCAGGATCGCGCCCTGGGCCAAAGGCAGGCGCCAAACCGCTGCGCCACCCAGGGATCCC	T	PASS	intron_variant	MODIFIER	DISC1	488970	transcript	XR_002625585.1	pseudogene	8	n.3805+8442_3805+8662del		-1	-1	-1	-1	-1	-1	0
4	7709214	TTAAATGTTTTATTTATTTATTTTTTTTTTAATTTTTTTTATTTATTTATGATAGTCACAGAGAGAGAGAGAGAGAGAGAGAGAGAGAGAGGCAGAGACACAGGCAGAGGGAGAAGCAGGCTCCATGCACCGGGAGCCCGATGTGGGATTCGATCCCGGGTCTCCAGGATCGCGCCCTGGGCCAAAGGCAGGCGCCAAACCGCTGCGCCACCCAGGGATCCC	T	PASS	intron_variant	MODIFIER	DISC1	488970	transcript	XR_002625586.1	pseudogene	8	n.3807+8442_3807+8662del		-1	-1	-1	-1	-1	-1	0
4	7709214	TTAAATGTTTTATTTATTTATTTTTTTTTTAATTTTTTTTATTTATTTATGATAGTCACAGAGAGAGAGAGAGAGAGAGAGAGAGAGAGAGGCAGAGACACAGGCAGAGGGAGAAGCAGGCTCCATGCACCGGGAGCCCGATGTGGGATTCGATCCCGGGTCTCCAGGATCGCGCCCTGGGCCAAAGGCAGGCGCCAAACCGCTGCGCCACCCAGGGATCCC	T	PASS	intron_variant	MODIFIER	DISC1	488970	transcript	XR_002625587.1	pseudogene	8	n.4087+8442_4087+8662del		-1	-1	-1	-1	-1	-1	0
4	15854429	T	TCA	PASS	intergenic_region	MODIFIER	LOC106558700-LOC100686418	106558700-100686418	intergenic_region	106558700-100686418		-1	n.15854429_15854430insCA		-1	-1	-1	-1	-1	-1	0
4	16532090	G	A	PASS	intergenic_region	MODIFIER	LOC100686418-LOC102152895	100686418-102152895	intergenic_region	100686418-102152895		-1	n.16532090G>A		-1	-1	-1	-1	-1	-1	0
4	21181609	A	C	PASS	missense_variant	MODERATE	PPA1	479238	transcript	XM_005619434.1	protein_coding	3	c.55T>G	p.Phe19Val	55	1190	55	867	19	288	0
4	34298456	C	G	PASS	upstream_gene_variant	MODIFIER	WAPL	612854	transcript	XM_859741.5	protein_coding	-1	c.-2162G>C		-1	-1	-1	-1	-1	-1	1001
4	34298456	C	G	PASS	upstream_gene_variant	MODIFIER	WAPL	612854	transcript	XM_859725.5	protein_coding	-1	c.-2162G>C		-1	-1	-1	-1	-1	-1	1000
4	34298456	C	G	PASS	intergenic_region	MODIFIER	WAPL-LOC106558677	612854-106558677	intergenic_region	612854-106558677		-1	n.34298456C>G		-1	-1	-1	-1	-1	-1	0
4	36987466	ATGGGAAAT	A	PASS	intron_variant	MODIFIER	SIMC1	489106	transcript	XM_546222.5	protein_coding	9	c.2563+3614_2563+3621delATTTCCCA		-1	-1	-1	-1	-1	-1	0
4	40067749	C	CTTCTCCCTCTGCCTA	PASS	downstream_gene_variant	MODIFIER	UBTD2	489120	transcript	XM_546238.5	protein_coding	-1	c.*5506_*5507insTTCTCCCTCTGCCTA		-1	-1	-1	-1	-1	-1	3238
4	40067749	C	CTTCTCCCTCTGCCTA	PASS	downstream_gene_variant	MODIFIER	EFCAB9	479290	transcript	XM_536430.6	protein_coding	-1	c.*3321_*3322insTAGGCAGAGGGAGAA		-1	-1	-1	-1	-1	-1	3243
4	40067749	C	CTTCTCCCTCTGCCTA	PASS	downstream_gene_variant	MODIFIER	UBTD2	489120	transcript	XM_022417696.1	protein_coding	-1	c.*5506_*5507insTTCTCCCTCTGCCTA		-1	-1	-1	-1	-1	-1	3238
4	40067749	C	CTTCTCCCTCTGCCTA	PASS	downstream_gene_variant	MODIFIER	UBTD2	489120	transcript	XM_022417695.1	protein_coding	-1	c.*5506_*5507insTTCTCCCTCTGCCTA		-1	-1	-1	-1	-1	-1	3238
4	40067749	C	CTTCTCCCTCTGCCTA	PASS	downstream_gene_variant	MODIFIER	UBTD2	489120	transcript	XM_022417694.1	protein_coding	-1	c.*5506_*5507insTTCTCCCTCTGCCTA		-1	-1	-1	-1	-1	-1	3238
4	40067749	C	CTTCTCCCTCTGCCTA	PASS	downstream_gene_variant	MODIFIER	EFCAB9	479290	transcript	XM_005619207.3	protein_coding	-1	c.*3321_*3322insTAGGCAGAGGGAGAA		-1	-1	-1	-1	-1	-1	3238
4	40067749	C	CTTCTCCCTCTGCCTA	PASS	intron_variant	MODIFIER	EFCAB9	479290	transcript	XM_022417697.1	protein_coding	3	c.462+4373_462+4374insTAGGCAGAGGGAGAA		-1	-1	-1	-1	-1	-1	0
4	49462626	G	GCTGATGTT	PASS	intron_variant	MODIFIER	GABRB2	489146	transcript	XM_014113039.2	protein_coding	5	c.541+1297_541+1298insCTGATGTT		-1	-1	-1	-1	-1	-1	0
4	49462626	G	GCTGATGTT	PASS	intron_variant	MODIFIER	GABRB2	489146	transcript	XM_014113040.2	protein_coding	5	c.541+1297_541+1298insCTGATGTT		-1	-1	-1	-1	-1	-1	0
4	54673268	G	T	PASS	intergenic_region	MODIFIER	SGCD-LOC111095573	612079-111095573	intergenic_region	612079-111095573		-1	n.54673268G>T		-1	-1	-1	-1	-1	-1	0
4	57415753	A	C	PASS	upstream_gene_variant	MODIFIER	LOC111095584	111095584	transcript	XR_002626001.1	pseudogene	-1	n.-1496T>G		-1	-1	-1	-1	-1	-1	1496
4	57415753	A	C	PASS	intergenic_region	MODIFIER	LOC111095584-GLRA1	111095584-489172	intergenic_region	111095584-489172		-1	n.57415753A>C		-1	-1	-1	-1	-1	-1	0
4	57587485	A	AG	PASS	upstream_gene_variant	MODIFIER	G3BP1	479322	transcript	XM_862279.5	protein_coding	-1	c.-19818_-19817insC		-1	-1	-1	-1	-1	-1	2111
4	57587485	A	AG	PASS	intergenic_region	MODIFIER	G3BP1-ATOX1	479322-403713	intergenic_region	479322-403713		-1	n.57587485_57587486insG		-1	-1	-1	-1	-1	-1	0
4	57587488	A	AG	PASS	upstream_gene_variant	MODIFIER	G3BP1	479322	transcript	XM_862279.5	protein_coding	-1	c.-19821_-19820insC		-1	-1	-1	-1	-1	-1	2114
4	57587488	A	AG	PASS	intergenic_region	MODIFIER	G3BP1-ATOX1	479322-403713	intergenic_region	479322-403713		-1	n.57587488_57587489insG		-1	-1	-1	-1	-1	-1	0
4	65201463	A	C	PASS	intergenic_region	MODIFIER	HCN1-LOC100688385	612434-100688385	intergenic_region	612434-100688385		-1	n.65201463A>C		-1	-1	-1	-1	-1	-1	0
4	70457271	T	TA	PASS	upstream_gene_variant	MODIFIER	LOC100687772	100687772	transcript	XM_014113135.1	protein_coding	-1	c.-4557_-4556insA		-1	-1	-1	-1	-1	-1	4507
4	70457271	T	TA	PASS	intron_variant	MODIFIER	EGFLAM	479359	transcript	XM_005619376.3	protein_coding	7	c.740-10717_740-10716insT		-1	-1	-1	-1	-1	-1	0
4	70589823	A	ATAGGGACATTAAAAAGATTAGCGGTGGTCAGGGGCTGTGGT	PASS	intergenic_region	MODIFIER	EGFLAM-LOC111095629	479359-111095629	intergenic_region	479359-111095629		-1	n.70589823_70589824insTAGGGACATTAAAAAGATTAGCGGTGGTCAGGGGCTGTGGT		-1	-1	-1	-1	-1	-1	0
4	72599521	T	A	PASS	intron_variant	MODIFIER	CAPSL	106557502	transcript	XM_014112793.2	protein_coding	1	c.1-4221T>A		-1	-1	-1	-1	-1	-1	0
4	72599521	T	A	PASS	intron_variant	MODIFIER	CAPSL	106557502	transcript	XM_022417922.1	protein_coding	1	c.-1+321T>A		-1	-1	-1	-1	-1	-1	0
4	72952347	G	T	PASS	intergenic_region	MODIFIER	LOC489235-LOC111095643	489235-111095643	intergenic_region	489235-111095643		-1	n.72952347G>T		-1	-1	-1	-1	-1	-1	0
4	73438119	TC	T	PASS	intron_variant	MODIFIER	TTC23L	479367	transcript	XM_014113150.2	protein_coding	5	c.521-5537delG		-1	-1	-1	-1	-1	-1	0
4	73438119	TC	T	PASS	intron_variant	MODIFIER	TTC23L	479367	transcript	XM_005619409.3	protein_coding	4	c.377-5537delG		-1	-1	-1	-1	-1	-1	0
4	73438119	TC	T	PASS	intron_variant	MODIFIER	TTC23L	479367	transcript	XM_022417938.1	protein_coding	4	c.377-5537delG		-1	-1	-1	-1	-1	-1	0
4	73438119	TC	T	PASS	intron_variant	MODIFIER	TTC23L	479367	transcript	XM_536506.6	protein_coding	4	c.401-5537delG		-1	-1	-1	-1	-1	-1	0
4	73438119	TC	T	PASS	intron_variant	MODIFIER	TTC23L	479367	transcript	XM_005619408.3	protein_coding	4	c.377-5537delG		-1	-1	-1	-1	-1	-1	0
4	73438119	TC	T	PASS	intron_variant	MODIFIER	TTC23L	479367	transcript	XR_002626123.1	pseudogene	5	n.669-5537delG		-1	-1	-1	-1	-1	-1	0
4	73438122	T	C	PASS	intron_variant	MODIFIER	TTC23L	479367	transcript	XM_014113150.2	protein_coding	5	c.521-5539A>G		-1	-1	-1	-1	-1	-1	0
4	73438122	T	C	PASS	intron_variant	MODIFIER	TTC23L	479367	transcript	XM_005619409.3	protein_coding	4	c.377-5539A>G		-1	-1	-1	-1	-1	-1	0
4	73438122	T	C	PASS	intron_variant	MODIFIER	TTC23L	479367	transcript	XM_022417938.1	protein_coding	4	c.377-5539A>G		-1	-1	-1	-1	-1	-1	0
4	73438122	T	C	PASS	intron_variant	MODIFIER	TTC23L	479367	transcript	XM_536506.6	protein_coding	4	c.401-5539A>G		-1	-1	-1	-1	-1	-1	0
4	73438122	T	C	PASS	intron_variant	MODIFIER	TTC23L	479367	transcript	XM_005619408.3	protein_coding	4	c.377-5539A>G		-1	-1	-1	-1	-1	-1	0
4	73438122	T	C	PASS	intron_variant	MODIFIER	TTC23L	479367	transcript	XR_002626123.1	pseudogene	5	n.669-5539A>G		-1	-1	-1	-1	-1	-1	0
4	73673960	TG	T	PASS	intergenic_region	MODIFIER	RAI14-LOC111095648	479368-111095648	intergenic_region	479368-111095648		-1	n.73673961delG		-1	-1	-1	-1	-1	-1	0
4	73673975	G	A	PASS	intergenic_region	MODIFIER	RAI14-LOC111095648	479368-111095648	intergenic_region	479368-111095648		-1	n.73673975G>A		-1	-1	-1	-1	-1	-1	0
4	73673984	C	T	PASS	intergenic_region	MODIFIER	RAI14-LOC111095648	479368-111095648	intergenic_region	479368-111095648		-1	n.73673984C>T		-1	-1	-1	-1	-1	-1	0
4	73673997	T	C	PASS	intergenic_region	MODIFIER	RAI14-LOC111095648	479368-111095648	intergenic_region	479368-111095648		-1	n.73673997T>C		-1	-1	-1	-1	-1	-1	0
4	73674001	A	G	PASS	intergenic_region	MODIFIER	RAI14-LOC111095648	479368-111095648	intergenic_region	479368-111095648		-1	n.73674001A>G		-1	-1	-1	-1	-1	-1	0
4	73674047	C	A	PASS	intergenic_region	MODIFIER	RAI14-LOC111095648	479368-111095648	intergenic_region	479368-111095648		-1	n.73674047C>A		-1	-1	-1	-1	-1	-1	0
4	73674094	G	GC	PASS	intergenic_region	MODIFIER	RAI14-LOC111095648	479368-111095648	intergenic_region	479368-111095648		-1	n.73674094_73674095insC		-1	-1	-1	-1	-1	-1	0
4	73674130	G	A	PASS	intergenic_region	MODIFIER	RAI14-LOC111095648	479368-111095648	intergenic_region	479368-111095648		-1	n.73674130G>A		-1	-1	-1	-1	-1	-1	0
4	73674166	C	T	PASS	intergenic_region	MODIFIER	RAI14-LOC111095648	479368-111095648	intergenic_region	479368-111095648		-1	n.73674166C>T		-1	-1	-1	-1	-1	-1	0
4	73674241	C	T	PASS	intergenic_region	MODIFIER	RAI14-LOC111095648	479368-111095648	intergenic_region	479368-111095648		-1	n.73674241C>T		-1	-1	-1	-1	-1	-1	0
4	74950357	C	A	PASS	intron_variant	MODIFIER	SUB1	479283	transcript	XM_536425.6	protein_coding	1	c.-2+1196G>T		-1	-1	-1	-1	-1	-1	0
4	74950371	G	T	PASS	intron_variant	MODIFIER	SUB1	479283	transcript	XM_536425.6	protein_coding	1	c.-2+1182C>A		-1	-1	-1	-1	-1	-1	0
4	74950377	C	T	PASS	intron_variant	MODIFIER	SUB1	479283	transcript	XM_536425.6	protein_coding	1	c.-2+1176G>A		-1	-1	-1	-1	-1	-1	0
4	74950380	C	G	PASS	intron_variant	MODIFIER	SUB1	479283	transcript	XM_536425.6	protein_coding	1	c.-2+1173G>C		-1	-1	-1	-1	-1	-1	0
4	74950382	C	T	PASS	intron_variant	MODIFIER	SUB1	479283	transcript	XM_536425.6	protein_coding	1	c.-2+1171G>A		-1	-1	-1	-1	-1	-1	0
4	74950434	C	A	PASS	intron_variant	MODIFIER	SUB1	479283	transcript	XM_536425.6	protein_coding	1	c.-2+1119G>T		-1	-1	-1	-1	-1	-1	0
4	74950440	C	A	PASS	intron_variant	MODIFIER	SUB1	479283	transcript	XM_536425.6	protein_coding	1	c.-2+1113G>T		-1	-1	-1	-1	-1	-1	0
4	74950464	G	T	PASS	intron_variant	MODIFIER	SUB1	479283	transcript	XM_536425.6	protein_coding	1	c.-2+1089C>A		-1	-1	-1	-1	-1	-1	0
4	74950466	C	A	PASS	intron_variant	MODIFIER	SUB1	479283	transcript	XM_536425.6	protein_coding	1	c.-2+1087G>T		-1	-1	-1	-1	-1	-1	0
4	74950482	G	T	PASS	intron_variant	MODIFIER	SUB1	479283	transcript	XM_536425.6	protein_coding	1	c.-2+1071C>A		-1	-1	-1	-1	-1	-1	0
4	74950495	A	G	PASS	intron_variant	MODIFIER	SUB1	479283	transcript	XM_536425.6	protein_coding	1	c.-2+1058T>C		-1	-1	-1	-1	-1	-1	0
4	74950498	C	G	PASS	intron_variant	MODIFIER	SUB1	479283	transcript	XM_536425.6	protein_coding	1	c.-2+1055G>C		-1	-1	-1	-1	-1	-1	0
4	74950500	C	G	PASS	intron_variant	MODIFIER	SUB1	479283	transcript	XM_536425.6	protein_coding	1	c.-2+1053G>C		-1	-1	-1	-1	-1	-1	0
4	74950504	C	G	PASS	intron_variant	MODIFIER	SUB1	479283	transcript	XM_536425.6	protein_coding	1	c.-2+1049G>C		-1	-1	-1	-1	-1	-1	0
4	74950506	A	G	PASS	intron_variant	MODIFIER	SUB1	479283	transcript	XM_536425.6	protein_coding	1	c.-2+1047T>C		-1	-1	-1	-1	-1	-1	0
4	74950509	C	G	PASS	intron_variant	MODIFIER	SUB1	479283	transcript	XM_536425.6	protein_coding	1	c.-2+1044G>C		-1	-1	-1	-1	-1	-1	0
4	75023851	AGAAAGAAAGAGAG	A	PASS	intron_variant	MODIFIER	LOC111095654	111095654	transcript	XR_002626147.1	pseudogene	1	n.361-1708_361-1696delGAAAGAAAGAGAG		-1	-1	-1	-1	-1	-1	0
4	82309116	A	AT	PASS	intergenic_region	MODIFIER	LOC102156814-CDH12	102156814-489253	intergenic_region	102156814-489253		-1	n.82309116_82309117insT		-1	-1	-1	-1	-1	-1	0
4	83634079	CT	C	PASS	intergenic_region	MODIFIER	479138-CDH18	479138-489256	intergenic_region	479138-489256		-1	n.83634080delT		-1	-1	-1	-1	-1	-1	0
4	84729348	T	C	PASS	intron_variant	MODIFIER	CDH18	489256	transcript	XM_014113159.2	protein_coding	4	c.644-27587T>C		-1	-1	-1	-1	-1	-1	0
4	84729348	T	C	PASS	intron_variant	MODIFIER	CDH18	489256	transcript	XM_014113160.2	protein_coding	6	c.644-27587T>C		-1	-1	-1	-1	-1	-1	0
4	84729348	T	C	PASS	intron_variant	MODIFIER	CDH18	489256	transcript	XM_022417962.1	protein_coding	6	c.644-27587T>C		-1	-1	-1	-1	-1	-1	0
4	84729348	T	C	PASS	intron_variant	MODIFIER	CDH18	489256	transcript	XM_022417960.1	protein_coding	7	c.644-27587T>C		-1	-1	-1	-1	-1	-1	0
4	84729348	T	C	PASS	intron_variant	MODIFIER	CDH18	489256	transcript	XM_022417961.1	protein_coding	6	c.644-53557T>C		-1	-1	-1	-1	-1	-1	0
4	84729348	T	C	PASS	intron_variant	MODIFIER	CDH18	489256	transcript	XM_546374.5	protein_coding	6	c.644-27587T>C		-1	-1	-1	-1	-1	-1	0
4	85994038	T	TAA	PASS	intergenic_region	MODIFIER	LOC111095742-LOC111095665	111095742-111095665	intergenic_region	111095742-111095665		-1	n.85994038_85994039insAA		-1	-1	-1	-1	-1	-1	0
4	85994040	ATG	A	PASS	intergenic_region	MODIFIER	LOC111095742-LOC111095665	111095742-111095665	intergenic_region	111095742-111095665		-1	n.85994041_85994042delTG		-1	-1	-1	-1	-1	-1	0
4	86107825	C	A	PASS	intergenic_region	MODIFIER	LOC111095665-LOC111095743	111095665-111095743	intergenic_region	111095665-111095743		-1	n.86107825C>A		-1	-1	-1	-1	-1	-1	0
4	86167861	C	G	PASS	intergenic_region	MODIFIER	LOC111095743-LOC111095744	111095743-111095744	intergenic_region	111095743-111095744		-1	n.86167861C>G		-1	-1	-1	-1	-1	-1	0
4	86199452	G	A	PASS	intergenic_region	MODIFIER	LOC111095743-LOC111095744	111095743-111095744	intergenic_region	111095743-111095744		-1	n.86199452G>A		-1	-1	-1	-1	-1	-1	0
4	86199819	C	T	PASS	intergenic_region	MODIFIER	LOC111095743-LOC111095744	111095743-111095744	intergenic_region	111095743-111095744		-1	n.86199819C>T		-1	-1	-1	-1	-1	-1	0
4	86208237	T	C	PASS	intron_variant	MODIFIER	LOC111095744	111095744	transcript	XR_002626290.1	pseudogene	2	n.373-548A>G		-1	-1	-1	-1	-1	-1	0
4	86209371	G	A	PASS	downstream_gene_variant	MODIFIER	LOC111095666	111095666	transcript	XR_002626178.1	pseudogene	-1	n.*3943C>T		-1	-1	-1	-1	-1	-1	3943
4	86209371	G	A	PASS	downstream_gene_variant	MODIFIER	LOC111095666	111095666	transcript	XR_002626183.1	pseudogene	-1	n.*3943C>T		-1	-1	-1	-1	-1	-1	3943
4	86209371	G	A	PASS	downstream_gene_variant	MODIFIER	LOC111095666	111095666	transcript	XR_002626180.1	pseudogene	-1	n.*3943C>T		-1	-1	-1	-1	-1	-1	3943
4	86209371	G	A	PASS	downstream_gene_variant	MODIFIER	LOC111095666	111095666	transcript	XR_002626181.1	pseudogene	-1	n.*3943C>T		-1	-1	-1	-1	-1	-1	3943
4	86209371	G	A	PASS	downstream_gene_variant	MODIFIER	LOC111095666	111095666	transcript	XR_002626185.1	pseudogene	-1	n.*3943C>T		-1	-1	-1	-1	-1	-1	3943
4	86209371	G	A	PASS	downstream_gene_variant	MODIFIER	LOC111095666	111095666	transcript	XR_002626188.1	pseudogene	-1	n.*3943C>T		-1	-1	-1	-1	-1	-1	3943
4	86209371	G	A	PASS	downstream_gene_variant	MODIFIER	LOC111095666	111095666	transcript	XR_002626187.1	pseudogene	-1	n.*3944C>T		-1	-1	-1	-1	-1	-1	3944
4	86209371	G	A	PASS	downstream_gene_variant	MODIFIER	LOC111095666	111095666	transcript	XR_002626186.1	pseudogene	-1	n.*3944C>T		-1	-1	-1	-1	-1	-1	3944
4	86209371	G	A	PASS	downstream_gene_variant	MODIFIER	LOC111095666	111095666	transcript	XR_002626182.1	pseudogene	-1	n.*3944C>T		-1	-1	-1	-1	-1	-1	3944
4	86209371	G	A	PASS	downstream_gene_variant	MODIFIER	LOC111095666	111095666	transcript	XR_002626184.1	pseudogene	-1	n.*3944C>T		-1	-1	-1	-1	-1	-1	3944
4	86209371	G	A	PASS	downstream_gene_variant	MODIFIER	LOC111095666	111095666	transcript	XR_002626179.1	pseudogene	-1	n.*3944C>T		-1	-1	-1	-1	-1	-1	3944
4	86209371	G	A	PASS	downstream_gene_variant	MODIFIER	LOC111095666	111095666	transcript	XR_002626189.1	pseudogene	-1	n.*3944C>T		-1	-1	-1	-1	-1	-1	3944
4	86209371	G	A	PASS	intron_variant	MODIFIER	LOC111095744	111095744	transcript	XR_002626290.1	pseudogene	2	n.372+382C>T		-1	-1	-1	-1	-1	-1	0
4	86215816	T	C	PASS	upstream_gene_variant	MODIFIER	LOC111095744	111095744	transcript	XR_002626290.1	pseudogene	-1	n.-2565A>G		-1	-1	-1	-1	-1	-1	2565
4	86215816	T	C	PASS	intron_variant	MODIFIER	LOC111095666	111095666	transcript	XR_002626178.1	pseudogene	5	n.10361-346A>G		-1	-1	-1	-1	-1	-1	0
4	86215816	T	C	PASS	intron_variant	MODIFIER	LOC111095666	111095666	transcript	XR_002626183.1	pseudogene	5	n.8019-346A>G		-1	-1	-1	-1	-1	-1	0
4	86215816	T	C	PASS	intron_variant	MODIFIER	LOC111095666	111095666	transcript	XR_002626180.1	pseudogene	6	n.9630-346A>G		-1	-1	-1	-1	-1	-1	0
4	86215816	T	C	PASS	intron_variant	MODIFIER	LOC111095666	111095666	transcript	XR_002626181.1	pseudogene	5	n.10307-346A>G		-1	-1	-1	-1	-1	-1	0
4	86215816	T	C	PASS	intron_variant	MODIFIER	LOC111095666	111095666	transcript	XR_002626185.1	pseudogene	4	n.10198-346A>G		-1	-1	-1	-1	-1	-1	0
4	86215816	T	C	PASS	intron_variant	MODIFIER	LOC111095666	111095666	transcript	XR_002626188.1	pseudogene	4	n.5395-346A>G		-1	-1	-1	-1	-1	-1	0
4	86215816	T	C	PASS	intron_variant	MODIFIER	LOC111095666	111095666	transcript	XR_002626187.1	pseudogene	5	n.7173-346A>G		-1	-1	-1	-1	-1	-1	0
4	86215816	T	C	PASS	intron_variant	MODIFIER	LOC111095666	111095666	transcript	XR_002626186.1	pseudogene	6	n.7223-346A>G		-1	-1	-1	-1	-1	-1	0
4	86215816	T	C	PASS	intron_variant	MODIFIER	LOC111095666	111095666	transcript	XR_002626182.1	pseudogene	6	n.7284-346A>G		-1	-1	-1	-1	-1	-1	0
4	86215816	T	C	PASS	intron_variant	MODIFIER	LOC111095666	111095666	transcript	XR_002626184.1	pseudogene	6	n.7278-346A>G		-1	-1	-1	-1	-1	-1	0
4	86215816	T	C	PASS	intron_variant	MODIFIER	LOC111095666	111095666	transcript	XR_002626179.1	pseudogene	6	n.7339-346A>G		-1	-1	-1	-1	-1	-1	0
4	86215816	T	C	PASS	intron_variant	MODIFIER	LOC111095666	111095666	transcript	XR_002626189.1	pseudogene	5	n.5347-346A>G		-1	-1	-1	-1	-1	-1	0
4	86230715	C	T	PASS	intron_variant	MODIFIER	LOC111095666	111095666	transcript	XR_002626183.1	pseudogene	3	n.2086+1162G>A		-1	-1	-1	-1	-1	-1	0
4	86230715	C	T	PASS	intron_variant	MODIFIER	LOC111095666	111095666	transcript	XR_002626187.1	pseudogene	2	n.1971+1102G>A		-1	-1	-1	-1	-1	-1	0
4	86230715	C	T	PASS	intron_variant	MODIFIER	LOC111095666	111095666	transcript	XR_002626186.1	pseudogene	3	n.2021+1162G>A		-1	-1	-1	-1	-1	-1	0
4	86230715	C	T	PASS	intron_variant	MODIFIER	LOC111095666	111095666	transcript	XR_002626182.1	pseudogene	3	n.2082+1102G>A		-1	-1	-1	-1	-1	-1	0
4	86230715	C	T	PASS	intron_variant	MODIFIER	LOC111095666	111095666	transcript	XR_002626184.1	pseudogene	3	n.2076+1162G>A		-1	-1	-1	-1	-1	-1	0
4	86230715	C	T	PASS	intron_variant	MODIFIER	LOC111095666	111095666	transcript	XR_002626179.1	pseudogene	3	n.2137+1102G>A		-1	-1	-1	-1	-1	-1	0
4	86230715	C	T	PASS	intron_variant	MODIFIER	LOC111095666	111095666	transcript	XR_002626189.1	pseudogene	2	n.145+1102G>A		-1	-1	-1	-1	-1	-1	0
4	86230715	C	T	PASS	non_coding_transcript_exon_variant	MODIFIER	LOC111095666	111095666	transcript	XR_002626178.1	pseudogene	4	n.2721G>A		-1	-1	-1	-1	-1	-1	0
4	86230715	C	T	PASS	non_coding_transcript_exon_variant	MODIFIER	LOC111095666	111095666	transcript	XR_002626180.1	pseudogene	4	n.2721G>A		-1	-1	-1	-1	-1	-1	0
4	86230715	C	T	PASS	non_coding_transcript_exon_variant	MODIFIER	LOC111095666	111095666	transcript	XR_002626181.1	pseudogene	4	n.2667G>A		-1	-1	-1	-1	-1	-1	0
4	86230715	C	T	PASS	non_coding_transcript_exon_variant	MODIFIER	LOC111095666	111095666	transcript	XR_002626185.1	pseudogene	3	n.2558G>A		-1	-1	-1	-1	-1	-1	0
4	86230715	C	T	PASS	non_coding_transcript_exon_variant	MODIFIER	LOC111095666	111095666	transcript	XR_002626188.1	pseudogene	4	n.2730G>A		-1	-1	-1	-1	-1	-1	0
4	86300081	G	A	PASS	intron_variant	MODIFIER	LOC111095670	111095670	transcript	XR_002626194.1	pseudogene	2	n.1525-1587C>T		-1	-1	-1	-1	-1	-1	0
4	87320790	A	T	PASS	intergenic_region	MODIFIER	LOC102151207-FBXL7	102151207-489262	intergenic_region	102151207-489262		-1	n.87320790A>T		-1	-1	-1	-1	-1	-1	0
5	3823432	G	GCGCTT	PASS	downstream_gene_variant	MODIFIER	LOC111095778	111095778	transcript	XM_022418080.1	protein_coding	-1	c.*17065_*17066insAAGCG		-1	-1	-1	-1	-1	-1	3681
5	3823432	G	GCGCTT	PASS	intergenic_region	MODIFIER	LOC111096088-LOC111095778	111096088-111095778	intergenic_region	111096088-111095778		-1	n.3823432_3823433insCGCTT		-1	-1	-1	-1	-1	-1	0
5	3823439	C	CCA	PASS	downstream_gene_variant	MODIFIER	LOC111095778	111095778	transcript	XM_022418080.1	protein_coding	-1	c.*17058_*17059insTG		-1	-1	-1	-1	-1	-1	3674
5	3823439	C	CCA	PASS	intergenic_region	MODIFIER	LOC111096088-LOC111095778	111096088-111095778	intergenic_region	111096088-111095778		-1	n.3823439_3823440insCA		-1	-1	-1	-1	-1	-1	0
5	3823441	T	TCTTGATTTTGGCTCAGGTCATGATCTCA	PASS	downstream_gene_variant	MODIFIER	LOC111095778	111095778	transcript	XM_022418080.1	protein_coding	-1	c.*17056_*17057insTGAGATCATGACCTGAGCCAAAATCAAG		-1	-1	-1	-1	-1	-1	3672
5	3823441	T	TCTTGATTTTGGCTCAGGTCATGATCTCA	PASS	intergenic_region	MODIFIER	LOC111096088-LOC111095778	111096088-111095778	intergenic_region	111096088-111095778		-1	n.3823441_3823442insCTTGATTTTGGCTCAGGTCATGATCTCA		-1	-1	-1	-1	-1	-1	0
5	15851054	G	T	PASS	intron_variant	MODIFIER	DSCAML1	489388	transcript	XM_546506.5	protein_coding	3	c.65-7883G>T		-1	-1	-1	-1	-1	-1	0
5	16464393	TC	T	PASS	intergenic_region	MODIFIER	C5H18orf12-LOC111095817	111096067-111095817	intergenic_region	111096067-111095817		-1	n.16464394delC		-1	-1	-1	-1	-1	-1	0
5	16464396	TTCTTTCTTTCTTTCTTTTTTTCTTC	T	PASS	intergenic_region	MODIFIER	C5H18orf12-LOC111095817	111096067-111095817	intergenic_region	111096067-111095817		-1	n.16464397_16464421delTCTTTCTTTCTTTCTTTTTTTCTTC		-1	-1	-1	-1	-1	-1	0
5	22645133	G	A	PASS	upstream_gene_variant	MODIFIER	LOC111095846	111095846	transcript	XR_002626509.1	pseudogene	-1	n.-3788C>T		-1	-1	-1	-1	-1	-1	3788
5	22645133	G	A	PASS	downstream_gene_variant	MODIFIER	RDX	479446	transcript	XM_022418341.1	protein_coding	-1	c.*5931G>A		-1	-1	-1	-1	-1	-1	2311
5	22645133	G	A	PASS	intergenic_region	MODIFIER	RDX-ZC3H12C	479446-489416	intergenic_region	479446-489416		-1	n.22645133G>A		-1	-1	-1	-1	-1	-1	0
5	24087320	T	TCACACAGTCATTAATGTTTGTCTTATATCCGTTTTGTTTATAATCATAAATTTATGGAGAATAGGACTATTTGA	PASS	intron_variant	MODIFIER	KDELC2	489419	transcript	XM_022418348.1	protein_coding	1	c.203-2231_203-2230insCACACAGTCATTAATGTTTGTCTTATATCCGTTTTGTTTATAATCATAAATTTATGGAGAATAGGACTATTTGA		-1	-1	-1	-1	-1	-1	0
5	24087320	T	TCACACAGTCATTAATGTTTGTCTTATATCCGTTTTGTTTATAATCATAAATTTATGGAGAATAGGACTATTTGA	PASS	intron_variant	MODIFIER	KDELC2	489419	transcript	XM_546537.4	protein_coding	1	c.203-2231_203-2230insCACACAGTCATTAATGTTTGTCTTATATCCGTTTTGTTTATAATCATAAATTTATGGAGAATAGGACTATTTGA		-1	-1	-1	-1	-1	-1	0
5	26701119	C	G	PASS	intergenic_region	MODIFIER	GRIA4-CASP4	489427-403724	intergenic_region	489427-403724		-1	n.26701119C>G		-1	-1	-1	-1	-1	-1	0
5	28210258	G	C	PASS	intergenic_region	MODIFIER	PDGFD-LOC111095863	479460-111095863	intergenic_region	479460-111095863		-1	n.28210258G>C		-1	-1	-1	-1	-1	-1	0
5	41239535	TC	T	PASS	intron_variant	MODIFIER	SHMT1	489536	transcript	XM_005620142.3	protein_coding	5	c.520-1171delC		-1	-1	-1	-1	-1	-1	0
5	41239535	TC	T	PASS	intron_variant	MODIFIER	SHMT1	489536	transcript	XM_846726.5	protein_coding	5	c.520-1171delC		-1	-1	-1	-1	-1	-1	0
5	41239535	TC	T	PASS	intron_variant	MODIFIER	SHMT1	489536	transcript	XM_005620143.3	protein_coding	5	c.520-1171delC		-1	-1	-1	-1	-1	-1	0
5	46695432	C	T	PASS	intron_variant	MODIFIER	ITGB3BP	609967	transcript	XM_014113718.2	protein_coding	5	c.332+4082C>T		-1	-1	-1	-1	-1	-1	0
5	46695432	C	T	PASS	intron_variant	MODIFIER	ITGB3BP	609967	transcript	XM_022418765.1	protein_coding	5	c.333-1398C>T		-1	-1	-1	-1	-1	-1	0
5	46695432	C	T	PASS	intron_variant	MODIFIER	ITGB3BP	609967	transcript	XM_022418762.1	protein_coding	5	c.332+4082C>T		-1	-1	-1	-1	-1	-1	0
5	46695432	C	T	PASS	intron_variant	MODIFIER	ITGB3BP	609967	transcript	XM_022418763.1	protein_coding	5	c.332+4082C>T		-1	-1	-1	-1	-1	-1	0
5	46695432	C	T	PASS	intron_variant	MODIFIER	ITGB3BP	609967	transcript	XM_022418761.1	protein_coding	5	c.332+4082C>T		-1	-1	-1	-1	-1	-1	0
5	46695432	C	T	PASS	intron_variant	MODIFIER	ITGB3BP	609967	transcript	XM_005620209.3	protein_coding	5	c.314+4082C>T		-1	-1	-1	-1	-1	-1	0
5	46695432	C	T	PASS	intron_variant	MODIFIER	ITGB3BP	609967	transcript	XM_022418764.1	protein_coding	5	c.314+4082C>T		-1	-1	-1	-1	-1	-1	0
5	46695432	C	T	PASS	intron_variant	MODIFIER	ITGB3BP	609967	transcript	XM_005620211.3	protein_coding	4	c.254+4082C>T		-1	-1	-1	-1	-1	-1	0
5	46695432	C	T	PASS	intron_variant	MODIFIER	ITGB3BP	609967	transcript	XM_005620210.3	protein_coding	4	c.266+4082C>T		-1	-1	-1	-1	-1	-1	0
5	46702023	G	T	PASS	intron_variant	MODIFIER	ITGB3BP	609967	transcript	XM_014113718.2	protein_coding	7	c.*57+40G>T		-1	-1	-1	-1	-1	-1	0
5	46702023	G	T	PASS	intron_variant	MODIFIER	ITGB3BP	609967	transcript	XM_022418762.1	protein_coding	7	c.*57+40G>T		-1	-1	-1	-1	-1	-1	0
5	46702023	G	T	PASS	intron_variant	MODIFIER	ITGB3BP	609967	transcript	XM_022418763.1	protein_coding	7	c.*57+40G>T		-1	-1	-1	-1	-1	-1	0
5	46702023	G	T	PASS	intron_variant	MODIFIER	ITGB3BP	609967	transcript	XM_022418761.1	protein_coding	7	c.*57+40G>T		-1	-1	-1	-1	-1	-1	0
5	46702023	G	T	PASS	intron_variant	MODIFIER	ITGB3BP	609967	transcript	XM_005620209.3	protein_coding	7	c.*57+40G>T		-1	-1	-1	-1	-1	-1	0
5	46702023	G	T	PASS	intron_variant	MODIFIER	ITGB3BP	609967	transcript	XM_022418764.1	protein_coding	7	c.*57+40G>T		-1	-1	-1	-1	-1	-1	0
5	46702023	G	T	PASS	intron_variant	MODIFIER	ITGB3BP	609967	transcript	XM_005620211.3	protein_coding	6	c.*57+40G>T		-1	-1	-1	-1	-1	-1	0
5	46702023	G	T	PASS	intron_variant	MODIFIER	ITGB3BP	609967	transcript	XM_005620210.3	protein_coding	6	c.*57+40G>T		-1	-1	-1	-1	-1	-1	0
5	53737508	C	A	PASS	intergenic_region	MODIFIER	LOC111095950-LOC111095951	111095950-111095951	intergenic_region	111095950-111095951		-1	n.53737508C>A		-1	-1	-1	-1	-1	-1	0
5	54621407	C	CTTTA	PASS	intron_variant	MODIFIER	LOC102151468	102151468	transcript	XR_002626800.1	pseudogene	4	n.1078+3819_1078+3820insTTTA		-1	-1	-1	-1	-1	-1	0
5	54621407	C	CTTTA	PASS	intron_variant	MODIFIER	LOC102151468	102151468	transcript	XR_292307.3	pseudogene	3	n.916+4859_916+4860insTTTA		-1	-1	-1	-1	-1	-1	0
5	59110441	T	C	PASS	intergenic_region	MODIFIER	LOC111095968-LOC111095969	111095968-111095969	intergenic_region	111095968-111095969		-1	n.59110441T>C		-1	-1	-1	-1	-1	-1	0
5	60275363	T	A	PASS	downstream_gene_variant	MODIFIER	HES2	607994	transcript	XM_005620455.3	protein_coding	-1	c.*1774A>T		-1	-1	-1	-1	-1	-1	282
5	60275363	T	A	PASS	intergenic_region	MODIFIER	LOC111096121-HES2	111096121-607994	intergenic_region	111096121-607994		-1	n.60275363T>A		-1	-1	-1	-1	-1	-1	0
5	60715085	CT	C	PASS	intron_variant	MODIFIER	CAMTA1	612806	transcript	XM_014113887.2	protein_coding	3	c.411+99949delT		-1	-1	-1	-1	-1	-1	0
5	60715085	CT	C	PASS	intron_variant	MODIFIER	CAMTA1	612806	transcript	XM_022418994.1	protein_coding	3	c.198+99949delT		-1	-1	-1	-1	-1	-1	0
5	60715085	CT	C	PASS	intron_variant	MODIFIER	CAMTA1	612806	transcript	XM_014113888.2	protein_coding	3	c.411+99949delT		-1	-1	-1	-1	-1	-1	0
5	60715085	CT	C	PASS	intron_variant	MODIFIER	CAMTA1	612806	transcript	XM_014113889.2	protein_coding	3	c.411+99949delT		-1	-1	-1	-1	-1	-1	0
5	60715085	CT	C	PASS	intron_variant	MODIFIER	CAMTA1	612806	transcript	XM_005620471.3	protein_coding	3	c.411+99949delT		-1	-1	-1	-1	-1	-1	0
5	60715085	CT	C	PASS	intron_variant	MODIFIER	CAMTA1	612806	transcript	XM_014113890.2	protein_coding	3	c.411+99949delT		-1	-1	-1	-1	-1	-1	0
5	60715085	CT	C	PASS	intron_variant	MODIFIER	CAMTA1	612806	transcript	XM_014113892.2	protein_coding	3	c.411+99949delT		-1	-1	-1	-1	-1	-1	0
5	60715085	CT	C	PASS	intron_variant	MODIFIER	CAMTA1	612806	transcript	XM_022418996.1	protein_coding	3	c.411+99949delT		-1	-1	-1	-1	-1	-1	0
5	61054250	C	CTGAATTGTGCAGGGGATCCCTGGGTGGCGCAGCGGTT	PASS	intron_variant	MODIFIER	CAMTA1	612806	transcript	XM_014113887.2	protein_coding	5	c.615+52489_615+52490insTGAATTGTGCAGGGGATCCCTGGGTGGCGCAGCGGTT		-1	-1	-1	-1	-1	-1	0
5	61054250	C	CTGAATTGTGCAGGGGATCCCTGGGTGGCGCAGCGGTT	PASS	intron_variant	MODIFIER	CAMTA1	612806	transcript	XM_022418994.1	protein_coding	5	c.402+52489_402+52490insTGAATTGTGCAGGGGATCCCTGGGTGGCGCAGCGGTT		-1	-1	-1	-1	-1	-1	0
5	61054250	C	CTGAATTGTGCAGGGGATCCCTGGGTGGCGCAGCGGTT	PASS	intron_variant	MODIFIER	CAMTA1	612806	transcript	XM_014113888.2	protein_coding	5	c.615+52489_615+52490insTGAATTGTGCAGGGGATCCCTGGGTGGCGCAGCGGTT		-1	-1	-1	-1	-1	-1	0
5	61054250	C	CTGAATTGTGCAGGGGATCCCTGGGTGGCGCAGCGGTT	PASS	intron_variant	MODIFIER	CAMTA1	612806	transcript	XM_014113889.2	protein_coding	5	c.615+52489_615+52490insTGAATTGTGCAGGGGATCCCTGGGTGGCGCAGCGGTT		-1	-1	-1	-1	-1	-1	0
5	61054250	C	CTGAATTGTGCAGGGGATCCCTGGGTGGCGCAGCGGTT	PASS	intron_variant	MODIFIER	CAMTA1	612806	transcript	XM_005620471.3	protein_coding	5	c.615+52489_615+52490insTGAATTGTGCAGGGGATCCCTGGGTGGCGCAGCGGTT		-1	-1	-1	-1	-1	-1	0
5	61054250	C	CTGAATTGTGCAGGGGATCCCTGGGTGGCGCAGCGGTT	PASS	intron_variant	MODIFIER	CAMTA1	612806	transcript	XM_014113890.2	protein_coding	5	c.615+52489_615+52490insTGAATTGTGCAGGGGATCCCTGGGTGGCGCAGCGGTT		-1	-1	-1	-1	-1	-1	0
5	61054250	C	CTGAATTGTGCAGGGGATCCCTGGGTGGCGCAGCGGTT	PASS	intron_variant	MODIFIER	CAMTA1	612806	transcript	XM_014113892.2	protein_coding	5	c.615+52489_615+52490insTGAATTGTGCAGGGGATCCCTGGGTGGCGCAGCGGTT		-1	-1	-1	-1	-1	-1	0
5	61054250	C	CTGAATTGTGCAGGGGATCCCTGGGTGGCGCAGCGGTT	PASS	intron_variant	MODIFIER	CAMTA1	612806	transcript	XM_022418996.1	protein_coding	5	c.615+52489_615+52490insTGAATTGTGCAGGGGATCCCTGGGTGGCGCAGCGGTT		-1	-1	-1	-1	-1	-1	0
5	61054250	C	CTGAATTGTGCAGGGGATCCCTGGGTGGCGCAGCGGTT	PASS	intron_variant	MODIFIER	CAMTA1	612806	transcript	XM_014113894.2	protein_coding	3	c.120+52489_120+52490insTGAATTGTGCAGGGGATCCCTGGGTGGCGCAGCGGTT		-1	-1	-1	-1	-1	-1	0
5	61054250	C	CTGAATTGTGCAGGGGATCCCTGGGTGGCGCAGCGGTT	PASS	intron_variant	MODIFIER	CAMTA1	612806	transcript	XM_022418997.1	protein_coding	4	c.198+52489_198+52490insTGAATTGTGCAGGGGATCCCTGGGTGGCGCAGCGGTT		-1	-1	-1	-1	-1	-1	0
5	61160969	T	G	PASS	intron_variant	MODIFIER	CAMTA1	612806	transcript	XM_014113887.2	protein_coding	5	c.616-23460T>G		-1	-1	-1	-1	-1	-1	0
5	61160969	T	G	PASS	intron_variant	MODIFIER	CAMTA1	612806	transcript	XM_022418994.1	protein_coding	5	c.403-23460T>G		-1	-1	-1	-1	-1	-1	0
5	61160969	T	G	PASS	intron_variant	MODIFIER	CAMTA1	612806	transcript	XM_014113888.2	protein_coding	5	c.616-23460T>G		-1	-1	-1	-1	-1	-1	0
5	61160969	T	G	PASS	intron_variant	MODIFIER	CAMTA1	612806	transcript	XM_014113889.2	protein_coding	5	c.615+159208T>G		-1	-1	-1	-1	-1	-1	0
5	61160969	T	G	PASS	intron_variant	MODIFIER	CAMTA1	612806	transcript	XM_005620471.3	protein_coding	5	c.616-23460T>G		-1	-1	-1	-1	-1	-1	0
5	61160969	T	G	PASS	intron_variant	MODIFIER	CAMTA1	612806	transcript	XM_014113890.2	protein_coding	5	c.616-23460T>G		-1	-1	-1	-1	-1	-1	0
5	61160969	T	G	PASS	intron_variant	MODIFIER	CAMTA1	612806	transcript	XM_014113892.2	protein_coding	5	c.616-23460T>G		-1	-1	-1	-1	-1	-1	0
5	61160969	T	G	PASS	intron_variant	MODIFIER	CAMTA1	612806	transcript	XM_022418996.1	protein_coding	5	c.616-23460T>G		-1	-1	-1	-1	-1	-1	0
5	61160969	T	G	PASS	intron_variant	MODIFIER	CAMTA1	612806	transcript	XM_014113894.2	protein_coding	3	c.121-23460T>G		-1	-1	-1	-1	-1	-1	0
5	61160969	T	G	PASS	intron_variant	MODIFIER	CAMTA1	612806	transcript	XM_022418997.1	protein_coding	4	c.199-23460T>G		-1	-1	-1	-1	-1	-1	0
5	61177703	C	A	PASS	intron_variant	MODIFIER	CAMTA1	612806	transcript	XM_014113887.2	protein_coding	5	c.616-6726C>A		-1	-1	-1	-1	-1	-1	0
5	61177703	C	A	PASS	intron_variant	MODIFIER	CAMTA1	612806	transcript	XM_022418994.1	protein_coding	5	c.403-6726C>A		-1	-1	-1	-1	-1	-1	0
5	61177703	C	A	PASS	intron_variant	MODIFIER	CAMTA1	612806	transcript	XM_014113888.2	protein_coding	5	c.616-6726C>A		-1	-1	-1	-1	-1	-1	0
5	61177703	C	A	PASS	intron_variant	MODIFIER	CAMTA1	612806	transcript	XM_014113889.2	protein_coding	5	c.616-145859C>A		-1	-1	-1	-1	-1	-1	0
5	61177703	C	A	PASS	intron_variant	MODIFIER	CAMTA1	612806	transcript	XM_005620471.3	protein_coding	5	c.616-6726C>A		-1	-1	-1	-1	-1	-1	0
5	61177703	C	A	PASS	intron_variant	MODIFIER	CAMTA1	612806	transcript	XM_014113890.2	protein_coding	5	c.616-6726C>A		-1	-1	-1	-1	-1	-1	0
5	61177703	C	A	PASS	intron_variant	MODIFIER	CAMTA1	612806	transcript	XM_014113892.2	protein_coding	5	c.616-6726C>A		-1	-1	-1	-1	-1	-1	0
5	61177703	C	A	PASS	intron_variant	MODIFIER	CAMTA1	612806	transcript	XM_022418996.1	protein_coding	5	c.616-6726C>A		-1	-1	-1	-1	-1	-1	0
5	61177703	C	A	PASS	intron_variant	MODIFIER	CAMTA1	612806	transcript	XM_014113894.2	protein_coding	3	c.121-6726C>A		-1	-1	-1	-1	-1	-1	0
5	61177703	C	A	PASS	intron_variant	MODIFIER	CAMTA1	612806	transcript	XM_022418997.1	protein_coding	4	c.199-6726C>A		-1	-1	-1	-1	-1	-1	0
5	61932286	G	A	PASS	intron_variant	MODIFIER	RERE	479596	transcript	XM_014113909.2	protein_coding	12	c.1204-8045C>T		-1	-1	-1	-1	-1	-1	0
5	61932286	G	A	PASS	intron_variant	MODIFIER	RERE	479596	transcript	XM_005620488.3	protein_coding	5	c.400-8045C>T		-1	-1	-1	-1	-1	-1	0
5	61932286	G	A	PASS	intron_variant	MODIFIER	RERE	479596	transcript	XM_022419023.1	protein_coding	11	c.1204-8045C>T		-1	-1	-1	-1	-1	-1	0
5	61932286	G	A	PASS	intron_variant	MODIFIER	RERE	479596	transcript	XM_022419022.1	protein_coding	11	c.1204-8045C>T		-1	-1	-1	-1	-1	-1	0
5	61932286	G	A	PASS	intron_variant	MODIFIER	RERE	479596	transcript	XM_014113910.2	protein_coding	12	c.1204-8045C>T		-1	-1	-1	-1	-1	-1	0
5	61932286	G	A	PASS	intron_variant	MODIFIER	RERE	479596	transcript	XM_014113911.2	protein_coding	11	c.1078-8045C>T		-1	-1	-1	-1	-1	-1	0
5	62269595	G	GA	PASS	intergenic_region	MODIFIER	RERE-ENO1	479596-479597	intergenic_region	479596-479597		-1	n.62269595_62269596insA		-1	-1	-1	-1	-1	-1	0
5	62344777	G	A	PASS	upstream_gene_variant	MODIFIER	LOC100688505	100688505	transcript	100688505	pseudogene	-1	n.-4725C>T		-1	-1	-1	-1	-1	-1	4725
5	62344777	G	A	PASS	intergenic_region	MODIFIER	LOC100688505-CA6	100688505-403503	intergenic_region	100688505-403503		-1	n.62344777G>A		-1	-1	-1	-1	-1	-1	0
5	62470077	TG	T	PASS	intron_variant	MODIFIER	GPR157	608460	transcript	XM_005620601.1	protein_coding	1	c.347+1190delC		-1	-1	-1	-1	-1	-1	0	WARNING_TRANSCRIPT_NO_START_CODON
5	62671366	G	GC	PASS	downstream_gene_variant	MODIFIER	SPSB1	479598	transcript	XM_022419028.1	protein_coding	-1	c.*3687_*3688insC		-1	-1	-1	-1	-1	-1	1761
5	62671366	G	GC	PASS	downstream_gene_variant	MODIFIER	SPSB1	479598	transcript	XM_022419029.1	protein_coding	-1	c.*3687_*3688insC		-1	-1	-1	-1	-1	-1	1761
5	62671366	G	GC	PASS	intergenic_region	MODIFIER	SPSB1-LOC111095991	479598-111095991	intergenic_region	479598-111095991		-1	n.62671366_62671367insC		-1	-1	-1	-1	-1	-1	0
5	62671370	A	G	PASS	downstream_gene_variant	MODIFIER	SPSB1	479598	transcript	XM_022419028.1	protein_coding	-1	c.*3691A>G		-1	-1	-1	-1	-1	-1	1764
5	62671370	A	G	PASS	downstream_gene_variant	MODIFIER	SPSB1	479598	transcript	XM_022419029.1	protein_coding	-1	c.*3691A>G		-1	-1	-1	-1	-1	-1	1764
5	62671370	A	G	PASS	intergenic_region	MODIFIER	SPSB1-LOC111095991	479598-111095991	intergenic_region	479598-111095991		-1	n.62671370A>G		-1	-1	-1	-1	-1	-1	0
5	62671372	A	C	PASS	downstream_gene_variant	MODIFIER	SPSB1	479598	transcript	XM_022419028.1	protein_coding	-1	c.*3693A>C		-1	-1	-1	-1	-1	-1	1766
5	62671372	A	C	PASS	downstream_gene_variant	MODIFIER	SPSB1	479598	transcript	XM_022419029.1	protein_coding	-1	c.*3693A>C		-1	-1	-1	-1	-1	-1	1766
5	62671372	A	C	PASS	intergenic_region	MODIFIER	SPSB1-LOC111095991	479598-111095991	intergenic_region	479598-111095991		-1	n.62671372A>C		-1	-1	-1	-1	-1	-1	0
5	62671374	A	G	PASS	downstream_gene_variant	MODIFIER	SPSB1	479598	transcript	XM_022419028.1	protein_coding	-1	c.*3695A>G		-1	-1	-1	-1	-1	-1	1768
5	62671374	A	G	PASS	downstream_gene_variant	MODIFIER	SPSB1	479598	transcript	XM_022419029.1	protein_coding	-1	c.*3695A>G		-1	-1	-1	-1	-1	-1	1768
5	62671374	A	G	PASS	intergenic_region	MODIFIER	SPSB1-LOC111095991	479598-111095991	intergenic_region	479598-111095991		-1	n.62671374A>G		-1	-1	-1	-1	-1	-1	0
5	62671396	CGAAG	C	PASS	downstream_gene_variant	MODIFIER	SPSB1	479598	transcript	XM_022419028.1	protein_coding	-1	c.*3718_*3721delGAAG		-1	-1	-1	-1	-1	-1	1791
5	62671396	CGAAG	C	PASS	downstream_gene_variant	MODIFIER	SPSB1	479598	transcript	XM_022419029.1	protein_coding	-1	c.*3718_*3721delGAAG		-1	-1	-1	-1	-1	-1	1791
5	62671396	CGAAG	C	PASS	intergenic_region	MODIFIER	SPSB1-LOC111095991	479598-111095991	intergenic_region	479598-111095991		-1	n.62671397_62671400delGAAG		-1	-1	-1	-1	-1	-1	0
5	62715069	A	AT	PASS	intron_variant	MODIFIER	LOC111095991	111095991	transcript	XR_002626904.1	pseudogene	2	n.435-277_435-276insT		-1	-1	-1	-1	-1	-1	0
5	62715069	A	AT	PASS	intron_variant	MODIFIER	LOC111095991	111095991	transcript	XR_002626905.1	pseudogene	2	n.415-277_415-276insT		-1	-1	-1	-1	-1	-1	0
5	62715069	A	AT	PASS	intron_variant	MODIFIER	LOC111095991	111095991	transcript	XR_002626907.1	pseudogene	2	n.415-277_415-276insT		-1	-1	-1	-1	-1	-1	0
5	62715069	A	AT	PASS	intron_variant	MODIFIER	LOC111095991	111095991	transcript	XR_002626906.1	pseudogene	2	n.406-277_406-276insT		-1	-1	-1	-1	-1	-1	0
5	62828739	A	C	PASS	upstream_gene_variant	MODIFIER	TMEM201	489643	transcript	XM_022419441.1	protein_coding	-1	c.-2710A>C		-1	-1	-1	-1	-1	-1	2710
5	62828739	A	C	PASS	downstream_gene_variant	MODIFIER	SLC25A33	479599	transcript	XM_536737.4	protein_coding	-1	c.*3372A>C		-1	-1	-1	-1	-1	-1	3095
5	62828739	A	C	PASS	intergenic_region	MODIFIER	SLC25A33-TMEM201	479599-489643	intergenic_region	479599-489643		-1	n.62828739A>C		-1	-1	-1	-1	-1	-1	0
5	62828740	G	C	PASS	upstream_gene_variant	MODIFIER	TMEM201	489643	transcript	XM_022419441.1	protein_coding	-1	c.-2709G>C		-1	-1	-1	-1	-1	-1	2709
5	62828740	G	C	PASS	downstream_gene_variant	MODIFIER	SLC25A33	479599	transcript	XM_536737.4	protein_coding	-1	c.*3373G>C		-1	-1	-1	-1	-1	-1	3096
5	62828740	G	C	PASS	intergenic_region	MODIFIER	SLC25A33-TMEM201	479599-489643	intergenic_region	479599-489643		-1	n.62828740G>C		-1	-1	-1	-1	-1	-1	0
5	62828746	T	C	PASS	upstream_gene_variant	MODIFIER	TMEM201	489643	transcript	XM_022419441.1	protein_coding	-1	c.-2703T>C		-1	-1	-1	-1	-1	-1	2703
5	62828746	T	C	PASS	downstream_gene_variant	MODIFIER	SLC25A33	479599	transcript	XM_536737.4	protein_coding	-1	c.*3379T>C		-1	-1	-1	-1	-1	-1	3102
5	62828746	T	C	PASS	intergenic_region	MODIFIER	SLC25A33-TMEM201	479599-489643	intergenic_region	479599-489643		-1	n.62828746T>C		-1	-1	-1	-1	-1	-1	0
5	63678210	A	C	PASS	downstream_gene_variant	MODIFIER	TUBB3	102154194	transcript	XM_005620536.3	protein_coding	-1	c.*3873T>G		-1	-1	-1	-1	-1	-1	3555
5	63678210	A	C	PASS	intergenic_region	MODIFIER	DEF8-TUBB3	489651-102154194	intergenic_region	489651-102154194		-1	n.63678210A>C		-1	-1	-1	-1	-1	-1	0
5	64011633	TTAAAAGATATGGCTTAGGGATCCCTGGGTGGCGCAGCGGTTTAGCGCCTGCCTTTGGCCCAGGGCGCGATCCTGGAGACCCAGGATCGAATCCCACGTCGGGCTCCCGCTGCATGGAGCCTGCTTCTCCCTCTGCCTGTGTCTCTGCCTCTCTCTCTCTCTGTGACTATCATAAGTAAATAAATAAAAAAAATAAATAAAATAAAAA	T	PASS	intron_variant	MODIFIER	SPG7	489657	transcript	XM_546777.5	protein_coding	3	c.377-2140_377-1934del		-1	-1	-1	-1	-1	-1	0
5	64833628	A	C	PASS	intron_variant	MODIFIER	ZFPM1	100684205	transcript	XM_014113860.2	protein_coding	3	c.266-4651T>G		-1	-1	-1	-1	-1	-1	0
5	67410895	C	CCCCCCGACA	PASS	intergenic_region	MODIFIER	LOC111096010-FAM92B	111096010-100684523	intergenic_region	111096010-100684523		-1	n.67410895_67410896insCCCCCGACA		-1	-1	-1	-1	-1	-1	0
5	70810138	A	AGAAGAGTAACTGGGGAAAAAAAAAAAAAAAAAAAAAAAAAAAAAAAAAAAAAG	PASS	intron_variant	MODIFIER	CENPN	479635	transcript	XM_014113992.2	protein_coding	5	c.354+2911_354+2912insCTTTTTTTTTTTTTTTTTTTTTTTTTTTTTTTTTTTTTCCCCAGTTACTCTTC		-1	-1	-1	-1	-1	-1	0
5	70810138	A	AGAAGAGTAACTGGGGAAAAAAAAAAAAAAAAAAAAAAAAAAAAAAAAAAAAAG	PASS	intron_variant	MODIFIER	CENPN	479635	transcript	XM_014113993.2	protein_coding	3	c.315+2911_315+2912insCTTTTTTTTTTTTTTTTTTTTTTTTTTTTTTTTTTTTTCCCCAGTTACTCTTC		-1	-1	-1	-1	-1	-1	0
5	70810138	A	AGAAGAGTAACTGGGGAAAAAAAAAAAAAAAAAAAAAAAAAAAAAAAAAAAAAG	PASS	intron_variant	MODIFIER	CENPN	479635	transcript	XM_022419149.1	protein_coding	4	c.351+2911_351+2912insCTTTTTTTTTTTTTTTTTTTTTTTTTTTTTTTTTTTTTCCCCAGTTACTCTTC		-1	-1	-1	-1	-1	-1	0
5	70810138	A	AGAAGAGTAACTGGGGAAAAAAAAAAAAAAAAAAAAAAAAAAAAAAAAAAAAAG	PASS	intron_variant	MODIFIER	CENPN	479635	transcript	XM_536770.5	protein_coding	5	c.354+2911_354+2912insCTTTTTTTTTTTTTTTTTTTTTTTTTTTTTTTTTTTTTCCCCAGTTACTCTTC		-1	-1	-1	-1	-1	-1	0
5	71772909	A	T	PASS	intergenic_region	MODIFIER	LOC102156069-LOC100686635	102156069-100686635	intergenic_region	102156069-100686635		-1	n.71772909A>T		-1	-1	-1	-1	-1	-1	0
5	71795658	C	T	PASS	intergenic_region	MODIFIER	LOC102156069-LOC100686635	102156069-100686635	intergenic_region	102156069-100686635		-1	n.71795658C>T		-1	-1	-1	-1	-1	-1	0
5	71902205	G	A	PASS	upstream_gene_variant	MODIFIER	LOC100686635	100686635	transcript	100686635	pseudogene	-1	n.-1342G>A		-1	-1	-1	-1	-1	-1	1342
5	71902205	G	A	PASS	intergenic_region	MODIFIER	LOC102156069-LOC100686635	102156069-100686635	intergenic_region	102156069-100686635		-1	n.71902205G>A		-1	-1	-1	-1	-1	-1	0
5	72751182	A	T	PASS	intron_variant	MODIFIER	WWOX	610120	transcript	XM_005620667.3	protein_coding	8	c.1056+213986T>A		-1	-1	-1	-1	-1	-1	0
5	72751182	A	T	PASS	intron_variant	MODIFIER	WWOX	610120	transcript	XM_022419153.1	protein_coding	7	c.933+213986T>A		-1	-1	-1	-1	-1	-1	0
5	72751182	A	T	PASS	intron_variant	MODIFIER	WWOX	610120	transcript	XM_014113998.2	protein_coding	7	c.870+213986T>A		-1	-1	-1	-1	-1	-1	0
5	72751182	A	T	PASS	intron_variant	MODIFIER	WWOX	610120	transcript	XM_847530.5	protein_coding	8	c.1056+213986T>A		-1	-1	-1	-1	-1	-1	0
5	72751182	A	T	PASS	intron_variant	MODIFIER	WWOX	610120	transcript	XM_022419152.1	protein_coding	8	c.1057-16314T>A		-1	-1	-1	-1	-1	-1	0
5	72938985	C	CT	PASS	upstream_gene_variant	MODIFIER	LOC111096027	111096027	transcript	XR_002627041.1	pseudogene	-1	n.-3854_-3853insT		-1	-1	-1	-1	-1	-1	3853
5	72938985	C	CT	PASS	upstream_gene_variant	MODIFIER	LOC111096027	111096027	transcript	XR_002627040.1	pseudogene	-1	n.-3865_-3864insT		-1	-1	-1	-1	-1	-1	3864
5	72938985	C	CT	PASS	intron_variant	MODIFIER	WWOX	610120	transcript	XM_005620667.3	protein_coding	8	c.1056+26182_1056+26183insA		-1	-1	-1	-1	-1	-1	0
5	72938985	C	CT	PASS	intron_variant	MODIFIER	WWOX	610120	transcript	XM_022419153.1	protein_coding	7	c.933+26182_933+26183insA		-1	-1	-1	-1	-1	-1	0
5	72938985	C	CT	PASS	intron_variant	MODIFIER	WWOX	610120	transcript	XM_014113998.2	protein_coding	7	c.870+26182_870+26183insA		-1	-1	-1	-1	-1	-1	0
5	72938985	C	CT	PASS	intron_variant	MODIFIER	WWOX	610120	transcript	XM_847530.5	protein_coding	8	c.1056+26182_1056+26183insA		-1	-1	-1	-1	-1	-1	0
5	72938985	C	CT	PASS	intron_variant	MODIFIER	WWOX	610120	transcript	XM_022419152.1	protein_coding	8	c.1056+26182_1056+26183insA		-1	-1	-1	-1	-1	-1	0
5	72938985	C	CT	PASS	intron_variant	MODIFIER	WWOX	610120	transcript	XM_014113997.2	protein_coding	8	c.1057-8171_1057-8170insA		-1	-1	-1	-1	-1	-1	0
5	73059162	G	GAGTAGCTAACTCTCTGGACAATGAGTCAGCAAGCAGAGAGC	PASS	intron_variant	MODIFIER	WWOX	610120	transcript	XM_005620667.3	protein_coding	5	c.517-57566_517-57565insGCTCTCTGCTTGCTGACTCATTGTCCAGAGAGTTAGCTACT		-1	-1	-1	-1	-1	-1	0
5	73059162	G	GAGTAGCTAACTCTCTGGACAATGAGTCAGCAAGCAGAGAGC	PASS	intron_variant	MODIFIER	WWOX	610120	transcript	XM_022419153.1	protein_coding	4	c.394-57566_394-57565insGCTCTCTGCTTGCTGACTCATTGTCCAGAGAGTTAGCTACT		-1	-1	-1	-1	-1	-1	0
5	73059162	G	GAGTAGCTAACTCTCTGGACAATGAGTCAGCAAGCAGAGAGC	PASS	intron_variant	MODIFIER	WWOX	610120	transcript	XM_014113998.2	protein_coding	5	c.517-57566_517-57565insGCTCTCTGCTTGCTGACTCATTGTCCAGAGAGTTAGCTACT		-1	-1	-1	-1	-1	-1	0
5	73059162	G	GAGTAGCTAACTCTCTGGACAATGAGTCAGCAAGCAGAGAGC	PASS	intron_variant	MODIFIER	WWOX	610120	transcript	XM_847530.5	protein_coding	5	c.517-57566_517-57565insGCTCTCTGCTTGCTGACTCATTGTCCAGAGAGTTAGCTACT		-1	-1	-1	-1	-1	-1	0
5	73059162	G	GAGTAGCTAACTCTCTGGACAATGAGTCAGCAAGCAGAGAGC	PASS	intron_variant	MODIFIER	WWOX	610120	transcript	XM_022419152.1	protein_coding	5	c.517-57566_517-57565insGCTCTCTGCTTGCTGACTCATTGTCCAGAGAGTTAGCTACT		-1	-1	-1	-1	-1	-1	0
5	73059162	G	GAGTAGCTAACTCTCTGGACAATGAGTCAGCAAGCAGAGAGC	PASS	intron_variant	MODIFIER	WWOX	610120	transcript	XM_014113997.2	protein_coding	5	c.517-57566_517-57565insGCTCTCTGCTTGCTGACTCATTGTCCAGAGAGTTAGCTACT		-1	-1	-1	-1	-1	-1	0
5	73346377	C	T	PASS	intron_variant	MODIFIER	VAT1L	610152	transcript	XM_847568.5	protein_coding	7	c.1075-11336G>A		-1	-1	-1	-1	-1	-1	0
5	74328604	G	A	PASS	intergenic_region	MODIFIER	LOC106558849-LOC111096127	106558849-111096127	intergenic_region	106558849-111096127		-1	n.74328604G>A		-1	-1	-1	-1	-1	-1	0
5	74480992	T	A	PASS	intergenic_region	MODIFIER	LOC102157237-CNTNAP4	102157237-479642	intergenic_region	102157237-479642		-1	n.74480992T>A		-1	-1	-1	-1	-1	-1	0
5	74901175	T	G	PASS	intergenic_region	MODIFIER	LOC111096128-LOC490392	111096128-490392	intergenic_region	111096128-490392		-1	n.74901175T>G		-1	-1	-1	-1	-1	-1	0
5	74901193	G	A	PASS	intergenic_region	MODIFIER	LOC111096128-LOC490392	111096128-490392	intergenic_region	111096128-490392		-1	n.74901193G>A		-1	-1	-1	-1	-1	-1	0
5	74901207	T	C	PASS	intergenic_region	MODIFIER	LOC111096128-LOC490392	111096128-490392	intergenic_region	111096128-490392		-1	n.74901207T>C		-1	-1	-1	-1	-1	-1	0
5	74901513	A	T	PASS	intergenic_region	MODIFIER	LOC111096128-LOC490392	111096128-490392	intergenic_region	111096128-490392		-1	n.74901513A>T		-1	-1	-1	-1	-1	-1	0
5	74901518	C	A	PASS	intergenic_region	MODIFIER	LOC111096128-LOC490392	111096128-490392	intergenic_region	111096128-490392		-1	n.74901518C>A		-1	-1	-1	-1	-1	-1	0
5	74901527	C	G	PASS	intergenic_region	MODIFIER	LOC111096128-LOC490392	111096128-490392	intergenic_region	111096128-490392		-1	n.74901527C>G		-1	-1	-1	-1	-1	-1	0
5	75177542	A	C	PASS	upstream_gene_variant	MODIFIER	TERF2IP	479643	transcript	XM_536776.6	protein_coding	-1	c.-4704T>G		-1	-1	-1	-1	-1	-1	4583
5	75177542	A	C	PASS	intron_variant	MODIFIER	KARS	479644	transcript	XM_022419170.1	protein_coding	1	c.147-84A>C		-1	-1	-1	-1	-1	-1	0
5	75177542	A	C	PASS	intron_variant	MODIFIER	KARS	479644	transcript	XM_536777.6	protein_coding	1	c.63-84A>C		-1	-1	-1	-1	-1	-1	0
5	75177542	A	C	PASS	intron_variant	MODIFIER	KARS	479644	transcript	XM_856440.4	protein_coding	2	c.147-84A>C		-1	-1	-1	-1	-1	-1	0
5	75300762	C	T	PASS	synonymous_variant	LOW	TMEM170A	100855824	transcript	XM_005620692.3	protein_coding	2	c.183C>T	p.Phe61Phe	325	3886	183	435	61	144	0
5	75300762	C	T	PASS	synonymous_variant	LOW	TMEM170A	100855824	transcript	XM_003639069.4	protein_coding	2	c.183C>T	p.Phe61Phe	325	3817	183	366	61	121	0
5	75300762	C	T	PASS	synonymous_variant	LOW	TMEM170A	100855824	transcript	XM_014114004.2	protein_coding	2	c.102C>T	p.Phe34Phe	339	3900	102	354	34	117	0
5	75300762	C	T	PASS	synonymous_variant	LOW	TMEM170A	100855824	transcript	XM_014114005.2	protein_coding	2	c.48C>T	p.Phe16Phe	584	4145	48	300	16	99	0
5	75300762	C	T	PASS	synonymous_variant	LOW	TMEM170A	100855824	transcript	XM_022419182.1	protein_coding	2	c.102C>T	p.Phe34Phe	339	3831	102	285	34	94	0
5	75300762	C	T	PASS	synonymous_variant	LOW	TMEM170A	100855824	transcript	XM_022419183.1	protein_coding	2	c.48C>T	p.Phe16Phe	584	4076	48	231	16	76	0
5	75312388	TTTTTCCATC	T	PASS	upstream_gene_variant	MODIFIER	CFDP1	403675	transcript	NM_001287118.1	protein_coding	-1	c.-928_-920delTTTTCCATC		-1	-1	-1	-1	-1	-1	803
5	75312388	TTTTTCCATC	T	PASS	upstream_gene_variant	MODIFIER	CFDP1	403675	transcript	XM_022418006.1	protein_coding	-1	c.-928_-920delTTTTCCATC		-1	-1	-1	-1	-1	-1	776
5	75312388	TTTTTCCATC	T	PASS	intergenic_region	MODIFIER	TMEM170A-CFDP1	100855824-403675	intergenic_region	100855824-403675		-1	n.75312389_75312397delTTTTCCATC		-1	-1	-1	-1	-1	-1	0
5	75384979	T	G	PASS	intron_variant	MODIFIER	CFDP1	403675	transcript	NM_001287118.1	protein_coding	5	c.651-46834T>G		-1	-1	-1	-1	-1	-1	0
5	75384979	T	G	PASS	intron_variant	MODIFIER	CFDP1	403675	transcript	XM_022418006.1	protein_coding	4	c.531-46834T>G		-1	-1	-1	-1	-1	-1	0
5	75436903	G	A	PASS	intron_variant	MODIFIER	CFDP1	403675	transcript	NM_001287118.1	protein_coding	6	c.809+4932G>A		-1	-1	-1	-1	-1	-1	0
5	75436903	G	A	PASS	intron_variant	MODIFIER	CFDP1	403675	transcript	XM_022418006.1	protein_coding	5	c.689+4932G>A		-1	-1	-1	-1	-1	-1	0
5	75669738	T	C	PASS	intron_variant	MODIFIER	ZNRF1	100687514	transcript	XM_014114011.2	protein_coding	1	c.295+28124A>G		-1	-1	-1	-1	-1	-1	0
5	75687322	A	G	PASS	intron_variant	MODIFIER	ZNRF1	100687514	transcript	XM_014114011.2	protein_coding	1	c.295+10540T>C		-1	-1	-1	-1	-1	-1	0
5	75777197	G	A	PASS	intron_variant	MODIFIER	WDR59	479653	transcript	XM_005620697.3	protein_coding	18	c.1855-1448G>A		-1	-1	-1	-1	-1	-1	0
5	75777197	G	A	PASS	intron_variant	MODIFIER	WDR59	479653	transcript	XM_022419189.1	protein_coding	18	c.1792-1448G>A		-1	-1	-1	-1	-1	-1	0
5	75777197	G	A	PASS	intron_variant	MODIFIER	WDR59	479653	transcript	XM_536785.6	protein_coding	18	c.1854+2319G>A		-1	-1	-1	-1	-1	-1	0
5	75786516	T	TTCTC	PASS	intron_variant	MODIFIER	WDR59	479653	transcript	XM_005620697.3	protein_coding	21	c.2127+160_2127+161insTCTC		-1	-1	-1	-1	-1	-1	0
5	75786516	T	TTCTC	PASS	intron_variant	MODIFIER	WDR59	479653	transcript	XM_022419189.1	protein_coding	21	c.2064+160_2064+161insTCTC		-1	-1	-1	-1	-1	-1	0
5	75786516	T	TTCTC	PASS	intron_variant	MODIFIER	WDR59	479653	transcript	XM_536785.6	protein_coding	20	c.2070+160_2070+161insTCTC		-1	-1	-1	-1	-1	-1	0
5	75956825	A	T	PASS	upstream_gene_variant	MODIFIER	RFWD3	610424	transcript	XM_847931.4	protein_coding	-1	c.-4130A>T		-1	-1	-1	-1	-1	-1	4084
5	75956825	A	T	PASS	upstream_gene_variant	MODIFIER	RFWD3	610424	transcript	XR_002627055.1	pseudogene	-1	n.-4084A>T		-1	-1	-1	-1	-1	-1	4084
5	75956825	A	T	PASS	upstream_gene_variant	MODIFIER	RFWD3	610424	transcript	XM_005620698.3	protein_coding	-1	c.-4663A>T		-1	-1	-1	-1	-1	-1	4459
5	75956825	A	T	PASS	intergenic_region	MODIFIER	FA2H-RFWD3	610417-610424	intergenic_region	610417-610424		-1	n.75956825A>T		-1	-1	-1	-1	-1	-1	0
5	76017629	C	T	PASS	upstream_gene_variant	MODIFIER	GLG1	479654	transcript	XM_536786.6	protein_coding	-1	c.-3138C>T		-1	-1	-1	-1	-1	-1	3114
5	76017629	C	T	PASS	intergenic_region	MODIFIER	RFWD3-GLG1	610424-479654	intergenic_region	610424-479654		-1	n.76017629C>T		-1	-1	-1	-1	-1	-1	0
5	76058601	GA	G	PASS	upstream_gene_variant	MODIFIER	LOC102153421	102153421	transcript	102153421	pseudogene	-1	n.-2854delT		-1	-1	-1	-1	-1	-1	2854
5	76058601	GA	G	PASS	intron_variant	MODIFIER	GLG1	479654	transcript	XM_536786.6	protein_coding	1	c.459+37377delA		-1	-1	-1	-1	-1	-1	0
5	76065898	C	G	PASS	intron_variant	MODIFIER	GLG1	479654	transcript	XM_536786.6	protein_coding	1	c.459+44673C>G		-1	-1	-1	-1	-1	-1	0
5	76140284	C	T	PASS	intron_variant	MODIFIER	GLG1	479654	transcript	XM_536786.6	protein_coding	8	c.1471-1202C>T		-1	-1	-1	-1	-1	-1	0
5	76171166	G	A	PASS	3_prime_UTR_variant	MODIFIER	GLG1	479654	transcript	XM_536786.6	protein_coding	26	c.*4532G>A		-1	-1	-1	-1	-1	-1	4532
5	76171166	G	A	PASS	downstream_gene_variant	MODIFIER	LOC111096035	111096035	transcript	XR_002627056.1	pseudogene	-1	n.*330C>T		-1	-1	-1	-1	-1	-1	330
5	76171166	G	A	PASS	downstream_gene_variant	MODIFIER	LOC111096035	111096035	transcript	XR_002627057.1	pseudogene	-1	n.*330C>T		-1	-1	-1	-1	-1	-1	330
5	76272313	G	A	PASS	downstream_gene_variant	MODIFIER	CLEC18C	100855981	transcript	XM_003639070.3	protein_coding	-1	c.*3005G>A		-1	-1	-1	-1	-1	-1	1821
5	76272313	G	A	PASS	downstream_gene_variant	MODIFIER	CLEC18C	100855981	transcript	XM_005620701.2	protein_coding	-1	c.*3005G>A		-1	-1	-1	-1	-1	-1	1821
5	76272313	G	A	PASS	intergenic_region	MODIFIER	CLEC18C-LOC610465	100855981-610465	intergenic_region	100855981-610465		-1	n.76272313G>A		-1	-1	-1	-1	-1	-1	0
5	76323398	G	A	PASS	intron_variant	MODIFIER	AARS	479656	transcript	XM_014114022.2	protein_coding	1	c.-21-14675C>T		-1	-1	-1	-1	-1	-1	0
5	76323398	G	A	PASS	intron_variant	MODIFIER	DDX19B	479657	transcript	XM_856865.5	protein_coding	1	c.175-490G>A		-1	-1	-1	-1	-1	-1	0
5	76323398	G	A	PASS	intron_variant	MODIFIER	DDX19B	479657	transcript	XM_005620704.3	protein_coding	1	c.73-490G>A		-1	-1	-1	-1	-1	-1	0
5	76323398	G	A	PASS	intron_variant	MODIFIER	DDX19B	479657	transcript	XM_005620703.3	protein_coding	1	c.88-490G>A		-1	-1	-1	-1	-1	-1	0
5	76323398	G	A	PASS	intron_variant	MODIFIER	DDX19B	479657	transcript	XM_856894.5	protein_coding	1	c.-167-2311G>A		-1	-1	-1	-1	-1	-1	0
5	76372960	T	A	PASS	downstream_gene_variant	MODIFIER	ST3GAL2	489714	transcript	XM_014114023.2	protein_coding	-1	c.*7133A>T		-1	-1	-1	-1	-1	-1	4822
5	76372960	T	A	PASS	downstream_gene_variant	MODIFIER	ST3GAL2	489714	transcript	XR_002627058.1	pseudogene	-1	n.*4822A>T		-1	-1	-1	-1	-1	-1	4822
5	76372960	T	A	PASS	intergenic_region	MODIFIER	DDX19A-ST3GAL2	479658-489714	intergenic_region	479658-489714		-1	n.76372960T>A		-1	-1	-1	-1	-1	-1	0
5	76425583	C	T	PASS	upstream_gene_variant	MODIFIER	LOC111096036	111096036	transcript	XR_002627061.1	pseudogene	-1	n.-2719C>T		-1	-1	-1	-1	-1	-1	2719
5	76425583	C	T	PASS	intron_variant	MODIFIER	ST3GAL2	489714	transcript	XM_014114023.2	protein_coding	1	c.-1040+2242G>A		-1	-1	-1	-1	-1	-1	0
5	76425583	C	T	PASS	intron_variant	MODIFIER	ST3GAL2	489714	transcript	XR_002627058.1	pseudogene	1	n.174+2242G>A		-1	-1	-1	-1	-1	-1	0
5	76464665	T	G	PASS	missense_variant	MODERATE	COG4	489716	transcript	XM_546836.6	protein_coding	17	c.2044A>C	p.Met682Leu	2074	2838	2044	2367	682	788	0
5	76464665	T	G	PASS	missense_variant	MODERATE	COG4	489716	transcript	XM_014114027.2	protein_coding	17	c.1816A>C	p.Met606Leu	2075	2839	1816	2139	606	712	0
5	76464665	T	G	PASS	downstream_gene_variant	MODIFIER	FUK	489715	transcript	XM_022419202.1	protein_coding	-1	c.*2208T>G		-1	-1	-1	-1	-1	-1	1500
5	76464665	T	G	PASS	downstream_gene_variant	MODIFIER	FUK	489715	transcript	XM_022419207.1	protein_coding	-1	c.*2208T>G		-1	-1	-1	-1	-1	-1	1894
5	76464665	T	G	PASS	downstream_gene_variant	MODIFIER	FUK	489715	transcript	XM_022419208.1	protein_coding	-1	c.*2208T>G		-1	-1	-1	-1	-1	-1	1894
5	76464665	T	G	PASS	downstream_gene_variant	MODIFIER	FUK	489715	transcript	XM_022419206.1	protein_coding	-1	c.*2221T>G		-1	-1	-1	-1	-1	-1	2070
5	76464665	T	G	PASS	downstream_gene_variant	MODIFIER	FUK	489715	transcript	XM_022419203.1	protein_coding	-1	c.*2208T>G		-1	-1	-1	-1	-1	-1	1894
5	76464665	T	G	PASS	downstream_gene_variant	MODIFIER	FUK	489715	transcript	XM_022419204.1	protein_coding	-1	c.*2208T>G		-1	-1	-1	-1	-1	-1	1894
5	76464665	T	G	PASS	downstream_gene_variant	MODIFIER	FUK	489715	transcript	XM_022419205.1	protein_coding	-1	c.*2208T>G		-1	-1	-1	-1	-1	-1	1894
5	76464665	T	G	PASS	downstream_gene_variant	MODIFIER	FUK	489715	transcript	XM_022419211.1	protein_coding	-1	c.*2208T>G		-1	-1	-1	-1	-1	-1	1894
5	76464665	T	G	PASS	downstream_gene_variant	MODIFIER	FUK	489715	transcript	XM_022419210.1	protein_coding	-1	c.*2208T>G		-1	-1	-1	-1	-1	-1	1894
5	76509820	C	T	PASS	intron_variant	MODIFIER	SF3B3	479659	transcript	XM_014114024.2	protein_coding	8	c.1068-3097C>T		-1	-1	-1	-1	-1	-1	0
5	76509820	C	T	PASS	intron_variant	MODIFIER	SF3B3	479659	transcript	XM_536791.6	protein_coding	8	c.1068-3097C>T		-1	-1	-1	-1	-1	-1	0
5	76578976	C	CT	PASS	intergenic_region	MODIFIER	SF3B3-LOC100688050	479659-100688050	intergenic_region	479659-100688050		-1	n.76578976_76578977insT		-1	-1	-1	-1	-1	-1	0
5	76688868	G	A	PASS	intron_variant	MODIFIER	VAC14	489717	transcript	XM_546837.6	protein_coding	12	c.1375-1278C>T		-1	-1	-1	-1	-1	-1	0
5	77016850	C	T	PASS	intron_variant	MODIFIER	HYDIN	100683062	transcript	XM_022419224.1	protein_coding	6	c.717-2240G>A		-1	-1	-1	-1	-1	-1	0
5	77016850	C	T	PASS	intron_variant	MODIFIER	HYDIN	100683062	transcript	XM_022419227.1	protein_coding	6	c.717-2240G>A		-1	-1	-1	-1	-1	-1	0
5	77016850	C	T	PASS	intron_variant	MODIFIER	HYDIN	100683062	transcript	XM_022419228.1	protein_coding	5	c.582-2240G>A		-1	-1	-1	-1	-1	-1	0
5	77016850	C	T	PASS	intron_variant	MODIFIER	HYDIN	100683062	transcript	XM_022419229.1	protein_coding	6	c.717-2240G>A		-1	-1	-1	-1	-1	-1	0
5	77016850	C	T	PASS	intron_variant	MODIFIER	HYDIN	100683062	transcript	XM_022419225.1	protein_coding	6	c.717-2240G>A		-1	-1	-1	-1	-1	-1	0
5	77016850	C	T	PASS	intron_variant	MODIFIER	HYDIN	100683062	transcript	XR_002627063.1	pseudogene	6	n.815-2240G>A		-1	-1	-1	-1	-1	-1	0
5	77016850	C	T	PASS	intron_variant	MODIFIER	HYDIN	100683062	transcript	XM_022419231.1	protein_coding	6	c.717-2240G>A		-1	-1	-1	-1	-1	-1	0
5	77123668	TA	T	PASS	intron_variant	MODIFIER	CMTR2	489718	transcript	XM_005620727.3	protein_coding	1	c.-20+1217delT		-1	-1	-1	-1	-1	-1	0
5	77123668	TA	T	PASS	intron_variant	MODIFIER	CMTR2	489718	transcript	XM_022419233.1	protein_coding	1	c.-20+667delT		-1	-1	-1	-1	-1	-1	0
5	78039254	A	T	PASS	intergenic_region	MODIFIER	LOC111096043-LOC100856440	111096043-100856440	intergenic_region	111096043-100856440		-1	n.78039254A>T		-1	-1	-1	-1	-1	-1	0
5	78574143	G	C	PASS	intron_variant	MODIFIER	ZFHX3	489729	transcript	XM_014114048.2	protein_coding	3	c.3214-26018C>G		-1	-1	-1	-1	-1	-1	0
5	78574143	G	C	PASS	intron_variant	MODIFIER	ZFHX3	489729	transcript	XR_002627074.1	pseudogene	3	n.3279-26018C>G		-1	-1	-1	-1	-1	-1	0
5	79527172	G	A	PASS	intergenic_region	MODIFIER	LOC102153541-LOC100682793	102153541-100682793	intergenic_region	102153541-100682793		-1	n.79527172G>A		-1	-1	-1	-1	-1	-1	0
5	80141237	T	TA	PASS	intergenic_region	MODIFIER	NFAT5-CYB5B	489734-610942	intergenic_region	489734-610942		-1	n.80141237_80141238insA		-1	-1	-1	-1	-1	-1	0
5	80297592	A	G	PASS	intron_variant	MODIFIER	TERF2	489736	transcript	XM_846135.5	protein_coding	7	c.1340+976A>G		-1	-1	-1	-1	-1	-1	0
5	80297592	A	G	PASS	intron_variant	MODIFIER	NIP7	479673	transcript	XM_022418020.1	protein_coding	4	c.424-9695T>C		-1	-1	-1	-1	-1	-1	0
5	80615304	G	A	PASS	intron_variant	MODIFIER	TANGO6	489741	transcript	XM_014114052.2	protein_coding	15	c.2834-16041C>T		-1	-1	-1	-1	-1	-1	0
5	80615304	G	A	PASS	intron_variant	MODIFIER	TANGO6	489741	transcript	XM_022419282.1	protein_coding	16	c.2603-16041C>T		-1	-1	-1	-1	-1	-1	0
5	80615304	G	A	PASS	intron_variant	MODIFIER	TANGO6	489741	transcript	XM_022419280.1	protein_coding	15	c.2771-16041C>T		-1	-1	-1	-1	-1	-1	0
5	80615304	G	A	PASS	intron_variant	MODIFIER	TANGO6	489741	transcript	XM_022419283.1	protein_coding	15	c.2603-16041C>T		-1	-1	-1	-1	-1	-1	0
5	80615304	G	A	PASS	intron_variant	MODIFIER	TANGO6	489741	transcript	XM_022419281.1	protein_coding	16	c.2603-16041C>T		-1	-1	-1	-1	-1	-1	0
5	81871303	CT	C	PASS	intergenic_region	MODIFIER	LOC111096056-RIPOR1	111096056-489757	intergenic_region	111096056-489757		-1	n.81871304delT		-1	-1	-1	-1	-1	-1	0
5	81871316	TTTCTTTCTTCTTTCTTTCTTTTC	T	PASS	intergenic_region	MODIFIER	LOC111096056-RIPOR1	111096056-489757	intergenic_region	111096056-489757		-1	n.81871317_81871339delTTCTTTCTTCTTTCTTTCTTTTC		-1	-1	-1	-1	-1	-1	0
5	82210260	C	T	PASS	upstream_gene_variant	MODIFIER	FBXL8	611261	transcript	XM_005620859.3	protein_coding	-1	c.-5932G>A		-1	-1	-1	-1	-1	-1	4202
5	82210260	C	T	PASS	upstream_gene_variant	MODIFIER	B3GNT9	489767	transcript	XM_005620862.3	protein_coding	-1	c.-3205C>T		-1	-1	-1	-1	-1	-1	2680
5	82210260	C	T	PASS	intron_variant	MODIFIER	TRADD	611262	transcript	XM_014114114.2	protein_coding	3	c.514-13C>T		-1	-1	-1	-1	-1	-1	0
5	82210260	C	T	PASS	intron_variant	MODIFIER	TRADD	611262	transcript	XM_848905.5	protein_coding	3	c.430-13C>T		-1	-1	-1	-1	-1	-1	0
5	82210260	C	T	PASS	intron_variant	MODIFIER	TRADD	611262	transcript	XM_005620856.3	protein_coding	4	c.463-13C>T		-1	-1	-1	-1	-1	-1	0
5	82210260	C	T	PASS	intron_variant	MODIFIER	TRADD	611262	transcript	XM_022419386.1	protein_coding	3	c.250-13C>T		-1	-1	-1	-1	-1	-1	0
5	86131221	T	G	PASS	intron_variant	MODIFIER	LOC111096063	111096063	transcript	XR_002627153.1	pseudogene	1	n.2412-32862T>G		-1	-1	-1	-1	-1	-1	0
5	86632679	TG	T	PASS	intron_variant	MODIFIER	CDH8	489777	transcript	XM_014114123.2	protein_coding	7	c.1414+23328delG		-1	-1	-1	-1	-1	-1	0
5	86632679	TG	T	PASS	intron_variant	MODIFIER	CDH8	489777	transcript	XM_022419410.1	protein_coding	6	c.721+23328delG		-1	-1	-1	-1	-1	-1	0
5	86632679	TG	T	PASS	intron_variant	MODIFIER	CDH8	489777	transcript	XM_022419411.1	protein_coding	1	c.-22+23328delG		-1	-1	-1	-1	-1	-1	0
5	86632693	A	G	PASS	intron_variant	MODIFIER	CDH8	489777	transcript	XM_014114123.2	protein_coding	7	c.1414+23341A>G		-1	-1	-1	-1	-1	-1	0
5	86632693	A	G	PASS	intron_variant	MODIFIER	CDH8	489777	transcript	XM_022419410.1	protein_coding	6	c.721+23341A>G		-1	-1	-1	-1	-1	-1	0
5	86632693	A	G	PASS	intron_variant	MODIFIER	CDH8	489777	transcript	XM_022419411.1	protein_coding	1	c.-22+23341A>G		-1	-1	-1	-1	-1	-1	0
6	4789	C	G	PASS	intergenic_region	MODIFIER	CHR_START-LOC106558875	CHR_START-106558875	intergenic_region	CHR_START-106558875		-1	n.4789C>G		-1	-1	-1	-1	-1	-1	0
6	5171	A	G	PASS	intergenic_region	MODIFIER	CHR_START-LOC106558875	CHR_START-106558875	intergenic_region	CHR_START-106558875		-1	n.5171A>G		-1	-1	-1	-1	-1	-1	0
6	11912	G	T	PASS	intergenic_region	MODIFIER	CHR_START-LOC106558875	CHR_START-106558875	intergenic_region	CHR_START-106558875		-1	n.11912G>T		-1	-1	-1	-1	-1	-1	0
6	11915	A	G	PASS	intergenic_region	MODIFIER	CHR_START-LOC106558875	CHR_START-106558875	intergenic_region	CHR_START-106558875		-1	n.11915A>G		-1	-1	-1	-1	-1	-1	0
6	11916	A	AGTTCGGGGG	PASS	intergenic_region	MODIFIER	CHR_START-LOC106558875	CHR_START-106558875	intergenic_region	CHR_START-106558875		-1	n.11916_11917insGTTCGGGGG		-1	-1	-1	-1	-1	-1	0
6	3780248	AT	A	PASS	intron_variant	MODIFIER	AUTS2	479709	transcript	XM_014114156.2	protein_coding	1	c.309+95054delA		-1	-1	-1	-1	-1	-1	0
6	3780248	AT	A	PASS	intron_variant	MODIFIER	AUTS2	479709	transcript	XM_022419532.1	protein_coding	1	c.171+56390delA		-1	-1	-1	-1	-1	-1	0
6	3780248	AT	A	PASS	intron_variant	MODIFIER	AUTS2	479709	transcript	XM_022419530.1	protein_coding	1	c.309+95054delA		-1	-1	-1	-1	-1	-1	0
6	3780248	AT	A	PASS	intron_variant	MODIFIER	AUTS2	479709	transcript	XM_022419531.1	protein_coding	1	c.309+95054delA		-1	-1	-1	-1	-1	-1	0
6	3780248	AT	A	PASS	intron_variant	MODIFIER	AUTS2	479709	transcript	XM_536837.7	protein_coding	1	c.309+95054delA		-1	-1	-1	-1	-1	-1	0
6	3780248	AT	A	PASS	intron_variant	MODIFIER	AUTS2	479709	transcript	XM_014114157.2	protein_coding	1	c.309+95054delA		-1	-1	-1	-1	-1	-1	0
6	3780250	AAATAAAT	A	PASS	intron_variant	MODIFIER	AUTS2	479709	transcript	XM_014114156.2	protein_coding	1	c.309+95046_309+95052delATTTATT		-1	-1	-1	-1	-1	-1	0
6	3780250	AAATAAAT	A	PASS	intron_variant	MODIFIER	AUTS2	479709	transcript	XM_022419532.1	protein_coding	1	c.171+56382_171+56388delATTTATT		-1	-1	-1	-1	-1	-1	0
6	3780250	AAATAAAT	A	PASS	intron_variant	MODIFIER	AUTS2	479709	transcript	XM_022419530.1	protein_coding	1	c.309+95046_309+95052delATTTATT		-1	-1	-1	-1	-1	-1	0
6	3780250	AAATAAAT	A	PASS	intron_variant	MODIFIER	AUTS2	479709	transcript	XM_022419531.1	protein_coding	1	c.309+95046_309+95052delATTTATT		-1	-1	-1	-1	-1	-1	0
6	3780250	AAATAAAT	A	PASS	intron_variant	MODIFIER	AUTS2	479709	transcript	XM_536837.7	protein_coding	1	c.309+95046_309+95052delATTTATT		-1	-1	-1	-1	-1	-1	0
6	3780250	AAATAAAT	A	PASS	intron_variant	MODIFIER	AUTS2	479709	transcript	XM_014114157.2	protein_coding	1	c.309+95046_309+95052delATTTATT		-1	-1	-1	-1	-1	-1	0
6	5147271	C	A	PASS	intergenic_region	MODIFIER	LOC111096483-LOC111096484	111096483-111096484	intergenic_region	111096483-111096484		-1	n.5147271C>A		-1	-1	-1	-1	-1	-1	0
6	5147272	T	C	PASS	intergenic_region	MODIFIER	LOC111096483-LOC111096484	111096483-111096484	intergenic_region	111096483-111096484		-1	n.5147272T>C		-1	-1	-1	-1	-1	-1	0
6	5852275	C	A	PASS	intergenic_region	MODIFIER	LOC102156042-LOC111096191	102156042-111096191	intergenic_region	102156042-111096191		-1	n.5852275C>A		-1	-1	-1	-1	-1	-1	0
6	6117759	T	TAAAATAAAAAAAATAAAAATTTAAAAATTTAAAAAAATTTAAAAATAAAAATAAATAAAATAAAATAA	PASS	upstream_gene_variant	MODIFIER	RFC2	489798	transcript	XM_005620953.3	protein_coding	-1	c.-1599_-1598insAAAATAAAAAAAATAAAAATTTAAAAATTTAAAAAAATTTAAAAATAAAAATAAATAAAATAAAATAA		-1	-1	-1	-1	-1	-1	1444
6	6117759	T	TAAAATAAAAAAAATAAAAATTTAAAAATTTAAAAAAATTTAAAAATAAAAATAAATAAAATAAAATAA	PASS	upstream_gene_variant	MODIFIER	RFC2	489798	transcript	XM_005620954.3	protein_coding	-1	c.-1599_-1598insAAAATAAAAAAAATAAAAATTTAAAAATTTAAAAAAATTTAAAAATAAAAATAAATAAAATAAAATAA		-1	-1	-1	-1	-1	-1	1443
6	6117759	T	TAAAATAAAAAAAATAAAAATTTAAAAATTTAAAAAAATTTAAAAATAAAAATAAATAAAATAAAATAA	PASS	upstream_gene_variant	MODIFIER	RFC2	489798	transcript	XM_022419545.1	protein_coding	-1	c.-1599_-1598insAAAATAAAAAAAATAAAAATTTAAAAATTTAAAAAAATTTAAAAATAAAAATAAATAAAATAAAATAA		-1	-1	-1	-1	-1	-1	1443
6	6117759	T	TAAAATAAAAAAAATAAAAATTTAAAAATTTAAAAAAATTTAAAAATAAAAATAAATAAAATAAAATAA	PASS	intergenic_region	MODIFIER	CLIP2-RFC2	489797-489798	intergenic_region	489797-489798		-1	n.6117759_6117760insAAAATAAAAAAAATAAAAATTTAAAAATTTAAAAAAATTTAAAAATAAAAATAAATAAAATAAAATAA		-1	-1	-1	-1	-1	-1	0
6	6117765	A	T	PASS	upstream_gene_variant	MODIFIER	RFC2	489798	transcript	XM_005620953.3	protein_coding	-1	c.-1593A>T		-1	-1	-1	-1	-1	-1	1439
6	6117765	A	T	PASS	upstream_gene_variant	MODIFIER	RFC2	489798	transcript	XM_005620954.3	protein_coding	-1	c.-1593A>T		-1	-1	-1	-1	-1	-1	1438
6	6117765	A	T	PASS	upstream_gene_variant	MODIFIER	RFC2	489798	transcript	XM_022419545.1	protein_coding	-1	c.-1593A>T		-1	-1	-1	-1	-1	-1	1438
6	6117765	A	T	PASS	intergenic_region	MODIFIER	CLIP2-RFC2	489797-489798	intergenic_region	489797-489798		-1	n.6117765A>T		-1	-1	-1	-1	-1	-1	0
6	6175198	C	CACCCGCACCCGCACCCGG	PASS	upstream_gene_variant	MODIFIER	LAT2	102156541	transcript	XM_014114168.2	protein_coding	-1	c.-3883_-3882insCCGGGTGCGGGTGCGGGT		-1	-1	-1	-1	-1	-1	1772
6	6175198	C	CACCCGCACCCGCACCCGG	PASS	upstream_gene_variant	MODIFIER	LAT2	102156541	transcript	XM_022419548.1	protein_coding	-1	c.-3883_-3882insCCGGGTGCGGGTGCGGGT		-1	-1	-1	-1	-1	-1	1574
6	6175198	C	CACCCGCACCCGCACCCGG	PASS	upstream_gene_variant	MODIFIER	LAT2	102156541	transcript	XM_022419549.1	protein_coding	-1	c.-3883_-3882insCCGGGTGCGGGTGCGGGT		-1	-1	-1	-1	-1	-1	1573
6	6175198	C	CACCCGCACCCGCACCCGG	PASS	downstream_gene_variant	MODIFIER	EIF4H	607749	transcript	XM_014114129.2	protein_coding	-1	c.*6863_*6864insCCGGGTGCGGGTGCGGGT		-1	-1	-1	-1	-1	-1	4990
6	6175198	C	CACCCGCACCCGCACCCGG	PASS	intron_variant	MODIFIER	LAT2	102156541	transcript	XM_022419547.1	protein_coding	1	c.-140+54_-140+55insCCGGGTGCGGGTGCGGGT		-1	-1	-1	-1	-1	-1	0
6	8840252	C	G	PASS	upstream_gene_variant	MODIFIER	LOC102151823	102151823	transcript	XM_022419625.1	protein_coding	-1	c.-4037G>C		-1	-1	-1	-1	-1	-1	3502
6	8840252	C	G	PASS	upstream_gene_variant	MODIFIER	LOC102151823	102151823	transcript	XM_022419626.1	protein_coding	-1	c.-4037G>C		-1	-1	-1	-1	-1	-1	3502
6	8840252	C	G	PASS	intergenic_region	MODIFIER	LOC102151823-LOC102156946	102151823-102156946	intergenic_region	102151823-102156946		-1	n.8840252C>G		-1	-1	-1	-1	-1	-1	0
6	11380188	G	A	PASS	intron_variant	MODIFIER	RSPH10B	608989	transcript	XM_846164.5	protein_coding	11	c.1433-959C>T		-1	-1	-1	-1	-1	-1	0
6	11380188	G	A	PASS	intron_variant	MODIFIER	RSPH10B	608989	transcript	XM_014114297.2	protein_coding	8	c.1007-959C>T		-1	-1	-1	-1	-1	-1	0
6	11380188	G	A	PASS	intron_variant	MODIFIER	RSPH10B	608989	transcript	XM_005621112.3	protein_coding	9	c.1097-959C>T		-1	-1	-1	-1	-1	-1	0
6	11380188	G	A	PASS	intron_variant	MODIFIER	RSPH10B	608989	transcript	XM_005621110.3	protein_coding	10	c.1364-959C>T		-1	-1	-1	-1	-1	-1	0
6	11380188	G	A	PASS	intron_variant	MODIFIER	RSPH10B	608989	transcript	XM_005621113.3	protein_coding	8	c.1007-959C>T		-1	-1	-1	-1	-1	-1	0
6	11380188	G	A	PASS	intron_variant	MODIFIER	RSPH10B	608989	transcript	XM_022419724.1	protein_coding	10	c.1097-959C>T		-1	-1	-1	-1	-1	-1	0
6	11380188	G	A	PASS	intron_variant	MODIFIER	RSPH10B	608989	transcript	XM_022419725.1	protein_coding	9	c.1007-959C>T		-1	-1	-1	-1	-1	-1	0
6	12623658	T	C	PASS	intron_variant	MODIFIER	SLC29A4	489883	transcript	XM_547001.6	protein_coding	1	c.-11-3366A>G		-1	-1	-1	-1	-1	-1	0
6	12623661	A	G	PASS	intron_variant	MODIFIER	SLC29A4	489883	transcript	XM_547001.6	protein_coding	1	c.-11-3369T>C		-1	-1	-1	-1	-1	-1	0
6	12623664	T	C	PASS	intron_variant	MODIFIER	SLC29A4	489883	transcript	XM_547001.6	protein_coding	1	c.-11-3372A>G		-1	-1	-1	-1	-1	-1	0
6	12623669	C	G	PASS	intron_variant	MODIFIER	SLC29A4	489883	transcript	XM_547001.6	protein_coding	1	c.-11-3377G>C		-1	-1	-1	-1	-1	-1	0
6	12623670	T	C	PASS	intron_variant	MODIFIER	SLC29A4	489883	transcript	XM_547001.6	protein_coding	1	c.-11-3378A>G		-1	-1	-1	-1	-1	-1	0
6	12623674	C	G	PASS	intron_variant	MODIFIER	SLC29A4	489883	transcript	XM_547001.6	protein_coding	1	c.-11-3382G>C		-1	-1	-1	-1	-1	-1	0
6	12623681	A	G	PASS	intron_variant	MODIFIER	SLC29A4	489883	transcript	XM_547001.6	protein_coding	1	c.-11-3389T>C		-1	-1	-1	-1	-1	-1	0
6	12623682	G	C	PASS	intron_variant	MODIFIER	SLC29A4	489883	transcript	XM_547001.6	protein_coding	1	c.-11-3390C>G		-1	-1	-1	-1	-1	-1	0
6	12623683	A	G	PASS	intron_variant	MODIFIER	SLC29A4	489883	transcript	XM_547001.6	protein_coding	1	c.-11-3391T>C		-1	-1	-1	-1	-1	-1	0
6	12623686	T	C	PASS	intron_variant	MODIFIER	SLC29A4	489883	transcript	XM_547001.6	protein_coding	1	c.-11-3394A>G		-1	-1	-1	-1	-1	-1	0
6	12623688	C	G	PASS	intron_variant	MODIFIER	SLC29A4	489883	transcript	XM_547001.6	protein_coding	1	c.-11-3396G>C		-1	-1	-1	-1	-1	-1	0
6	12623692	C	G	PASS	intron_variant	MODIFIER	SLC29A4	489883	transcript	XM_547001.6	protein_coding	1	c.-11-3400G>C		-1	-1	-1	-1	-1	-1	0
6	12623696	CATAT	C	PASS	intron_variant	MODIFIER	SLC29A4	489883	transcript	XM_547001.6	protein_coding	1	c.-11-3408_-11-3405delATAT		-1	-1	-1	-1	-1	-1	0
6	12623701	C	G	PASS	intron_variant	MODIFIER	SLC29A4	489883	transcript	XM_547001.6	protein_coding	1	c.-11-3409G>C		-1	-1	-1	-1	-1	-1	0
6	12623705	A	G	PASS	intron_variant	MODIFIER	SLC29A4	489883	transcript	XM_547001.6	protein_coding	1	c.-11-3413T>C		-1	-1	-1	-1	-1	-1	0
6	16068396	C	A	PASS	upstream_gene_variant	MODIFIER	LOC111096244	111096244	transcript	XR_002627460.1	pseudogene	-1	n.-4688G>T		-1	-1	-1	-1	-1	-1	4688
6	16068396	C	A	PASS	intron_variant	MODIFIER	LOC102154998	102154998	transcript	XM_005621223.2	protein_coding	2	c.721+136G>T		-1	-1	-1	-1	-1	-1	0
6	16068397	T	C	PASS	upstream_gene_variant	MODIFIER	LOC111096244	111096244	transcript	XR_002627460.1	pseudogene	-1	n.-4689A>G		-1	-1	-1	-1	-1	-1	4689
6	16068397	T	C	PASS	intron_variant	MODIFIER	LOC102154998	102154998	transcript	XM_005621223.2	protein_coding	2	c.721+135A>G		-1	-1	-1	-1	-1	-1	0
6	16787415	C	T	PASS	intron_variant	MODIFIER	ARMC5	489931	transcript	XM_547051.5	protein_coding	1	c.482-717G>A		-1	-1	-1	-1	-1	-1	0
6	16787415	C	T	PASS	intron_variant	MODIFIER	ARMC5	489931	transcript	XM_005621232.3	protein_coding	1	c.1+206G>A		-1	-1	-1	-1	-1	-1	0
6	18220995	A	AAAGAAAGAAAGAAAGAAAGAAAGAGG	PASS	upstream_gene_variant	MODIFIER	NUPR1	479793	transcript	XM_003434817.4	protein_coding	-1	c.-1585_-1584insAAGAAAGAAAGAAAGAAAGAAAGAGG		-1	-1	-1	-1	-1	-1	1371
6	18220995	A	AAAGAAAGAAAGAAAGAAAGAAAGAGG	PASS	upstream_gene_variant	MODIFIER	NUPR1	479793	transcript	XM_536921.6	protein_coding	-1	c.-1585_-1584insAAGAAAGAAAGAAAGAAAGAAAGAGG		-1	-1	-1	-1	-1	-1	1379
6	18220995	A	AAAGAAAGAAAGAAAGAAAGAAAGAGG	PASS	intergenic_region	MODIFIER	LOC111096257-NUPR1	111096257-479793	intergenic_region	111096257-479793		-1	n.18220995_18220996insAAGAAAGAAAGAAAGAAAGAAAGAGG		-1	-1	-1	-1	-1	-1	0
6	23050291	G	T	PASS	intergenic_region	MODIFIER	HS3ST2-OTOA	489975-608655	intergenic_region	489975-608655		-1	n.23050291G>T		-1	-1	-1	-1	-1	-1	0
6	23247266	C	A	PASS	intron_variant	MODIFIER	LOC102153375	102153375	transcript	XR_002627542.1	pseudogene	2	n.277+1745C>A		-1	-1	-1	-1	-1	-1	0
6	23247266	C	A	PASS	intron_variant	MODIFIER	LOC489976	489976	transcript	XM_014114548.2	protein_coding	6	c.1239-1989G>T		-1	-1	-1	-1	-1	-1	0
6	23247266	C	A	PASS	intron_variant	MODIFIER	LOC102153375	102153375	transcript	XR_002627544.1	pseudogene	2	n.275+1745C>A		-1	-1	-1	-1	-1	-1	0
6	23247266	C	A	PASS	intron_variant	MODIFIER	LOC102153375	102153375	transcript	XR_002627543.1	pseudogene	2	n.271+1745C>A		-1	-1	-1	-1	-1	-1	0
6	23247266	C	A	PASS	intron_variant	MODIFIER	LOC102153375	102153375	transcript	XR_292493.3	pseudogene	2	n.267+1745C>A		-1	-1	-1	-1	-1	-1	0
6	23247266	C	A	PASS	intron_variant	MODIFIER	LOC489976	489976	transcript	XM_014114550.2	protein_coding	6	c.1239-14907G>T		-1	-1	-1	-1	-1	-1	0
6	23247266	C	A	PASS	intron_variant	MODIFIER	LOC489976	489976	transcript	XM_022419956.1	protein_coding	6	c.1239-11571G>T		-1	-1	-1	-1	-1	-1	0
6	23247266	C	A	PASS	intron_variant	MODIFIER	LOC489976	489976	transcript	XM_022419954.1	protein_coding	6	c.1239-1989G>T		-1	-1	-1	-1	-1	-1	0
6	23247266	C	A	PASS	intron_variant	MODIFIER	LOC489976	489976	transcript	XM_022419957.1	protein_coding	6	c.1098-1989G>T		-1	-1	-1	-1	-1	-1	0
6	23367334	GTTCCTGGTGCCAATGCCTCAGTCCTTGCAGC	G	PASS	downstream_gene_variant	MODIFIER	EEF2K	479812	transcript	XM_005621431.3	protein_coding	-1	c.*4278_*4308delGCTGCAAGGACTGAGGCATTGGCACCAGGAA		-1	-1	-1	-1	-1	-1	961
6	23367334	GTTCCTGGTGCCAATGCCTCAGTCCTTGCAGC	G	PASS	downstream_gene_variant	MODIFIER	EEF2K	479812	transcript	XM_022419962.1	protein_coding	-1	c.*4278_*4308delGCTGCAAGGACTGAGGCATTGGCACCAGGAA		-1	-1	-1	-1	-1	-1	961
6	23367334	GTTCCTGGTGCCAATGCCTCAGTCCTTGCAGC	G	PASS	downstream_gene_variant	MODIFIER	EEF2K	479812	transcript	XM_005621433.3	protein_coding	-1	c.*4278_*4308delGCTGCAAGGACTGAGGCATTGGCACCAGGAA		-1	-1	-1	-1	-1	-1	961
6	23367334	GTTCCTGGTGCCAATGCCTCAGTCCTTGCAGC	G	PASS	downstream_gene_variant	MODIFIER	EEF2K	479812	transcript	XM_005621432.3	protein_coding	-1	c.*4278_*4308delGCTGCAAGGACTGAGGCATTGGCACCAGGAA		-1	-1	-1	-1	-1	-1	961
6	23367334	GTTCCTGGTGCCAATGCCTCAGTCCTTGCAGC	G	PASS	downstream_gene_variant	MODIFIER	EEF2K	479812	transcript	XM_536939.6	protein_coding	-1	c.*4278_*4308delGCTGCAAGGACTGAGGCATTGGCACCAGGAA		-1	-1	-1	-1	-1	-1	961
6	23367334	GTTCCTGGTGCCAATGCCTCAGTCCTTGCAGC	G	PASS	downstream_gene_variant	MODIFIER	EEF2K	479812	transcript	XM_005621436.3	protein_coding	-1	c.*4278_*4308delGCTGCAAGGACTGAGGCATTGGCACCAGGAA		-1	-1	-1	-1	-1	-1	961
6	23367334	GTTCCTGGTGCCAATGCCTCAGTCCTTGCAGC	G	PASS	intergenic_region	MODIFIER	TRNAL-AAG-EEF2K	111096547-479812	intergenic_region	111096547-479812		-1	n.23367335_23367365delTTCCTGGTGCCAATGCCTCAGTCCTTGCAGC		-1	-1	-1	-1	-1	-1	0
6	23788502	A	T	PASS	intron_variant	MODIFIER	LOC479816	479816	transcript	XM_022419975.1	protein_coding	11	c.1569+3077T>A		-1	-1	-1	-1	-1	-1	0
6	23788502	A	T	PASS	intron_variant	MODIFIER	LOC479816	479816	transcript	XM_022419976.1	protein_coding	12	c.1569+3077T>A		-1	-1	-1	-1	-1	-1	0
6	23788502	A	T	PASS	intron_variant	MODIFIER	LOC479816	479816	transcript	XM_005621440.3	protein_coding	11	c.1569+3077T>A		-1	-1	-1	-1	-1	-1	0
6	23788502	A	T	PASS	intron_variant	MODIFIER	LOC479816	479816	transcript	XM_022419977.1	protein_coding	11	c.1569+3077T>A		-1	-1	-1	-1	-1	-1	0
6	23788502	A	T	PASS	intron_variant	MODIFIER	LOC479816	479816	transcript	XM_022419978.1	protein_coding	11	c.1569+3077T>A		-1	-1	-1	-1	-1	-1	0
6	23788502	A	T	PASS	intron_variant	MODIFIER	LOC479816	479816	transcript	XM_022419980.1	protein_coding	11	c.1569+3077T>A		-1	-1	-1	-1	-1	-1	0
6	23788502	A	T	PASS	intron_variant	MODIFIER	LOC479816	479816	transcript	XM_022419979.1	protein_coding	11	c.1569+3077T>A		-1	-1	-1	-1	-1	-1	0
6	23788502	A	T	PASS	intron_variant	MODIFIER	LOC479816	479816	transcript	XR_002627553.1	pseudogene	11	n.1743+3077T>A		-1	-1	-1	-1	-1	-1	0
6	23788502	A	T	PASS	intron_variant	MODIFIER	LOC479816	479816	transcript	XR_002627554.1	pseudogene	11	n.1743+3077T>A		-1	-1	-1	-1	-1	-1	0
6	24490042	T	A	PASS	intron_variant	MODIFIER	DCUN1D3	489983	transcript	XM_005621453.3	protein_coding	2	c.-105-2928T>A		-1	-1	-1	-1	-1	-1	0
6	24490042	T	A	PASS	intron_variant	MODIFIER	DCUN1D3	489983	transcript	XM_022419999.1	protein_coding	1	c.-105-2928T>A		-1	-1	-1	-1	-1	-1	0
6	24490042	T	A	PASS	intron_variant	MODIFIER	DCUN1D3	489983	transcript	XM_022419995.1	protein_coding	2	c.-105-2928T>A		-1	-1	-1	-1	-1	-1	0
6	24490042	T	A	PASS	intron_variant	MODIFIER	DCUN1D3	489983	transcript	XM_022419994.1	protein_coding	2	c.-105-2928T>A		-1	-1	-1	-1	-1	-1	0
6	24490042	T	A	PASS	intron_variant	MODIFIER	DCUN1D3	489983	transcript	XM_022419996.1	protein_coding	1	c.-105-2928T>A		-1	-1	-1	-1	-1	-1	0
6	24490042	T	A	PASS	intron_variant	MODIFIER	DCUN1D3	489983	transcript	XM_022419998.1	protein_coding	1	c.-105-2928T>A		-1	-1	-1	-1	-1	-1	0
6	24490042	T	A	PASS	intron_variant	MODIFIER	DCUN1D3	489983	transcript	XM_022420000.1	protein_coding	1	c.-105-2928T>A		-1	-1	-1	-1	-1	-1	0
6	24490042	T	A	PASS	intron_variant	MODIFIER	DCUN1D3	489983	transcript	XM_005621456.3	protein_coding	1	c.-105-2928T>A		-1	-1	-1	-1	-1	-1	0
6	24490042	T	A	PASS	intron_variant	MODIFIER	DCUN1D3	489983	transcript	XM_845385.5	protein_coding	1	c.-105-2928T>A		-1	-1	-1	-1	-1	-1	0
6	24490042	T	A	PASS	intron_variant	MODIFIER	DCUN1D3	489983	transcript	XM_005621457.3	protein_coding	1	c.-105-2928T>A		-1	-1	-1	-1	-1	-1	0
6	25429596	A	T	PASS	intron_variant	MODIFIER	GPRC5B	100856475	transcript	XM_022420672.1	protein_coding	3	c.1436-1528A>T		-1	-1	-1	-1	-1	-1	0
6	27447006	G	GAAAGA	PASS	intergenic_region	MODIFIER	LOC111096500-LOC111096501	111096500-111096501	intergenic_region	111096500-111096501		-1	n.27447006_27447007insAAAGA		-1	-1	-1	-1	-1	-1	0
6	27710537	T	G	PASS	intron_variant	MODIFIER	LOC102154922	102154922	transcript	XR_002627584.1	pseudogene	3	n.1854+2775A>C		-1	-1	-1	-1	-1	-1	0
6	27710537	T	G	PASS	intron_variant	MODIFIER	LOC102154922	102154922	transcript	XR_002627582.1	pseudogene	2	n.1320+2775A>C		-1	-1	-1	-1	-1	-1	0
6	27710537	T	G	PASS	intron_variant	MODIFIER	LOC102154922	102154922	transcript	XR_002627583.1	pseudogene	2	n.1494+2775A>C		-1	-1	-1	-1	-1	-1	0
6	27710561	T	C	PASS	intron_variant	MODIFIER	LOC102154922	102154922	transcript	XR_002627584.1	pseudogene	3	n.1854+2751A>G		-1	-1	-1	-1	-1	-1	0
6	27710561	T	C	PASS	intron_variant	MODIFIER	LOC102154922	102154922	transcript	XR_002627582.1	pseudogene	2	n.1320+2751A>G		-1	-1	-1	-1	-1	-1	0
6	27710561	T	C	PASS	intron_variant	MODIFIER	LOC102154922	102154922	transcript	XR_002627583.1	pseudogene	2	n.1494+2751A>G		-1	-1	-1	-1	-1	-1	0
6	27710823	A	G	PASS	intron_variant	MODIFIER	LOC102154922	102154922	transcript	XR_002627584.1	pseudogene	3	n.1854+2489T>C		-1	-1	-1	-1	-1	-1	0
6	27710823	A	G	PASS	intron_variant	MODIFIER	LOC102154922	102154922	transcript	XR_002627582.1	pseudogene	2	n.1320+2489T>C		-1	-1	-1	-1	-1	-1	0
6	27710823	A	G	PASS	intron_variant	MODIFIER	LOC102154922	102154922	transcript	XR_002627583.1	pseudogene	2	n.1494+2489T>C		-1	-1	-1	-1	-1	-1	0
6	28649410	G	A	PASS	intron_variant	MODIFIER	PARN	479839	transcript	XM_536966.6	protein_coding	11	c.783+1533G>A		-1	-1	-1	-1	-1	-1	0
6	28748119	C	T	PASS	intron_variant	MODIFIER	PARN	479839	transcript	XM_536966.6	protein_coding	22	c.1670+6949C>T		-1	-1	-1	-1	-1	-1	0
6	31683805	A	T	PASS	intron_variant	MODIFIER	CLEC16A	100685190	transcript	XM_003434807.3	protein_coding	13	c.1538-6795T>A		-1	-1	-1	-1	-1	-1	0
6	31683805	A	T	PASS	intron_variant	MODIFIER	CLEC16A	100685190	transcript	XM_005621541.2	protein_coding	12	c.1484-6795T>A		-1	-1	-1	-1	-1	-1	0
6	31683805	A	T	PASS	intron_variant	MODIFIER	CLEC16A	100685190	transcript	XM_005621540.2	protein_coding	13	c.1490-6795T>A		-1	-1	-1	-1	-1	-1	0
6	31683805	A	T	PASS	intron_variant	MODIFIER	CLEC16A	100685190	transcript	XM_014114617.2	protein_coding	12	c.1532-6795T>A		-1	-1	-1	-1	-1	-1	0
6	31683805	A	T	PASS	intron_variant	MODIFIER	CLEC16A	100685190	transcript	XM_014114618.2	protein_coding	13	c.1538-6795T>A		-1	-1	-1	-1	-1	-1	0
6	31683805	A	T	PASS	intron_variant	MODIFIER	CLEC16A	100685190	transcript	XM_014114619.2	protein_coding	13	c.1538-6795T>A		-1	-1	-1	-1	-1	-1	0
6	31683805	A	T	PASS	intron_variant	MODIFIER	CLEC16A	100685190	transcript	XM_022420067.1	protein_coding	13	c.1538-6795T>A		-1	-1	-1	-1	-1	-1	0
6	31683805	A	T	PASS	intron_variant	MODIFIER	CLEC16A	100685190	transcript	XM_022420066.1	protein_coding	13	c.1538-6795T>A		-1	-1	-1	-1	-1	-1	0
6	31683805	A	T	PASS	intron_variant	MODIFIER	CLEC16A	100685190	transcript	XM_014114620.2	protein_coding	13	c.1538-6795T>A		-1	-1	-1	-1	-1	-1	0
6	31683805	A	T	PASS	intron_variant	MODIFIER	CLEC16A	100685190	transcript	XM_022420069.1	protein_coding	13	c.1538-6795T>A		-1	-1	-1	-1	-1	-1	0
6	31683805	A	T	PASS	intron_variant	MODIFIER	CLEC16A	100685190	transcript	XM_022420068.1	protein_coding	13	c.1538-6795T>A		-1	-1	-1	-1	-1	-1	0
6	32209493	T	C	PASS	intron_variant	MODIFIER	GRIN2A	490012	transcript	XM_005621556.3	protein_coding	1	c.-210+76978T>C		-1	-1	-1	-1	-1	-1	0
6	33187256	T	A	PASS	intergenic_region	MODIFIER	C6H16orf72-USP7	100685663-479854	intergenic_region	100685663-479854		-1	n.33187256T>A		-1	-1	-1	-1	-1	-1	0
6	33187259	TTA	T	PASS	intergenic_region	MODIFIER	C6H16orf72-USP7	100685663-479854	intergenic_region	100685663-479854		-1	n.33187260_33187261delTA		-1	-1	-1	-1	-1	-1	0
6	33187266	T	A	PASS	intergenic_region	MODIFIER	C6H16orf72-USP7	100685663-479854	intergenic_region	100685663-479854		-1	n.33187266T>A		-1	-1	-1	-1	-1	-1	0
6	38078609	G	T	PASS	upstream_gene_variant	MODIFIER	ZNF213	100688079	transcript	XM_022420158.1	protein_coding	-1	c.-3168C>A		-1	-1	-1	-1	-1	-1	3056
6	38078609	G	T	PASS	upstream_gene_variant	MODIFIER	LOC111096322	111096322	transcript	XR_002627633.1	pseudogene	-1	n.-4646G>T		-1	-1	-1	-1	-1	-1	4646
6	38078609	G	T	PASS	intergenic_region	MODIFIER	ZNF213-LOC111096322	100688079-111096322	intergenic_region	100688079-111096322		-1	n.38078609G>T		-1	-1	-1	-1	-1	-1	0
6	39878244	CAAG	C	PASS	upstream_gene_variant	MODIFIER	FBXL16	490090	transcript	XM_005621745.3	protein_coding	-1	c.-2287_-2285delAAG		-1	-1	-1	-1	-1	-1	1069
6	39878244	CAAG	C	PASS	upstream_gene_variant	MODIFIER	FBXL16	490090	transcript	XM_547211.6	protein_coding	-1	c.-2287_-2285delAAG		-1	-1	-1	-1	-1	-1	1079
6	39878244	CAAG	C	PASS	intergenic_region	MODIFIER	METRN-FBXL16	100686836-490090	intergenic_region	100686836-490090		-1	n.39878245_39878247delAAG		-1	-1	-1	-1	-1	-1	0
6	42796226	T	C	PASS	intron_variant	MODIFIER	WDR47	490126	transcript	XM_005621830.3	protein_coding	16	c.2626+235T>C		-1	-1	-1	-1	-1	-1	0
6	42796226	T	C	PASS	intron_variant	MODIFIER	WDR47	490126	transcript	XM_022420372.1	protein_coding	15	c.2626+235T>C		-1	-1	-1	-1	-1	-1	0
6	42796226	T	C	PASS	intron_variant	MODIFIER	WDR47	490126	transcript	XM_022420371.1	protein_coding	15	c.2626+235T>C		-1	-1	-1	-1	-1	-1	0
6	42796226	T	C	PASS	intron_variant	MODIFIER	WDR47	490126	transcript	XM_022420370.1	protein_coding	15	c.2626+235T>C		-1	-1	-1	-1	-1	-1	0
6	42796226	T	C	PASS	intron_variant	MODIFIER	WDR47	490126	transcript	XM_022420366.1	protein_coding	14	c.2623+235T>C		-1	-1	-1	-1	-1	-1	0
6	42796226	T	C	PASS	intron_variant	MODIFIER	WDR47	490126	transcript	XM_022420367.1	protein_coding	14	c.2620+235T>C		-1	-1	-1	-1	-1	-1	0
6	42796226	T	C	PASS	intron_variant	MODIFIER	WDR47	490126	transcript	XM_022420368.1	protein_coding	14	c.2617+235T>C		-1	-1	-1	-1	-1	-1	0
6	43511516	G	GATCCCTGGGTGGCGCAGCGGTTTGGCGCCTGCCTTTGGCCC	PASS	intergenic_region	MODIFIER	LOC611922-LOC102151888	611922-102151888	intergenic_region	611922-102151888		-1	n.43511516_43511517insATCCCTGGGTGGCGCAGCGGTTTGGCGCCTGCCTTTGGCCC		-1	-1	-1	-1	-1	-1	0
6	44242077	A	G	PASS	intron_variant	MODIFIER	NTNG1	490132	transcript	XM_022420693.1	protein_coding	2	c.247-8892T>C		-1	-1	-1	-1	-1	-1	0
6	45156472	C	T	PASS	intergenic_region	MODIFIER	LOC111096361-LOC102152190	111096361-102152190	intergenic_region	111096361-102152190		-1	n.45156472C>T		-1	-1	-1	-1	-1	-1	0
6	45262253	A	T	PASS	intergenic_region	MODIFIER	LOC111096361-LOC102152190	111096361-102152190	intergenic_region	111096361-102152190		-1	n.45262253A>T		-1	-1	-1	-1	-1	-1	0
6	45279513	C	T	PASS	intergenic_region	MODIFIER	LOC111096361-LOC102152190	111096361-102152190	intergenic_region	111096361-102152190		-1	n.45279513C>T		-1	-1	-1	-1	-1	-1	0
6	45297024	TA	T	PASS	intergenic_region	MODIFIER	LOC111096361-LOC102152190	111096361-102152190	intergenic_region	111096361-102152190		-1	n.45297025delA		-1	-1	-1	-1	-1	-1	0
6	45297697	G	A	PASS	intergenic_region	MODIFIER	LOC111096361-LOC102152190	111096361-102152190	intergenic_region	111096361-102152190		-1	n.45297697G>A		-1	-1	-1	-1	-1	-1	0
6	45318938	C	T	PASS	intron_variant	MODIFIER	LOC102152190	102152190	transcript	XR_292539.2	pseudogene	3	n.577-6137G>A		-1	-1	-1	-1	-1	-1	0
6	45318938	C	T	PASS	intron_variant	MODIFIER	LOC102152190	102152190	transcript	XR_002627737.1	pseudogene	2	n.271-6137G>A		-1	-1	-1	-1	-1	-1	0
6	45318938	C	T	PASS	intron_variant	MODIFIER	LOC102152190	102152190	transcript	XR_002627735.1	pseudogene	2	n.482-6137G>A		-1	-1	-1	-1	-1	-1	0
6	45318938	C	T	PASS	intron_variant	MODIFIER	LOC102152190	102152190	transcript	XR_002627736.1	pseudogene	3	n.369-6137G>A		-1	-1	-1	-1	-1	-1	0
6	45318938	C	T	PASS	non_coding_transcript_exon_variant	MODIFIER	LOC111096362	111096362	transcript	XR_002627740.1	pseudogene	2	n.1109C>T		-1	-1	-1	-1	-1	-1	0
6	45318938	C	T	PASS	non_coding_transcript_exon_variant	MODIFIER	LOC111096362	111096362	transcript	XR_002627738.1	pseudogene	1	n.482C>T		-1	-1	-1	-1	-1	-1	0
6	45318938	C	T	PASS	non_coding_transcript_exon_variant	MODIFIER	LOC111096362	111096362	transcript	XR_002627739.1	pseudogene	1	n.482C>T		-1	-1	-1	-1	-1	-1	0
6	45318938	C	T	PASS	non_coding_transcript_exon_variant	MODIFIER	LOC111096362	111096362	transcript	XR_002627741.1	pseudogene	1	n.482C>T		-1	-1	-1	-1	-1	-1	0
6	45318938	C	T	PASS	non_coding_transcript_exon_variant	MODIFIER	LOC111096362	111096362	transcript	XR_002627742.1	pseudogene	1	n.482C>T		-1	-1	-1	-1	-1	-1	0
6	45320069	A	C	PASS	intron_variant	MODIFIER	LOC102152190	102152190	transcript	XR_292539.2	pseudogene	3	n.577-7268T>G		-1	-1	-1	-1	-1	-1	0
6	45320069	A	C	PASS	intron_variant	MODIFIER	LOC111096362	111096362	transcript	XR_002627740.1	pseudogene	2	n.1194+1046A>C		-1	-1	-1	-1	-1	-1	0
6	45320069	A	C	PASS	intron_variant	MODIFIER	LOC102152190	102152190	transcript	XR_002627737.1	pseudogene	2	n.271-7268T>G		-1	-1	-1	-1	-1	-1	0
6	45320069	A	C	PASS	intron_variant	MODIFIER	LOC102152190	102152190	transcript	XR_002627735.1	pseudogene	2	n.482-7268T>G		-1	-1	-1	-1	-1	-1	0
6	45320069	A	C	PASS	intron_variant	MODIFIER	LOC102152190	102152190	transcript	XR_002627736.1	pseudogene	3	n.369-7268T>G		-1	-1	-1	-1	-1	-1	0
6	45320069	A	C	PASS	intron_variant	MODIFIER	LOC111096362	111096362	transcript	XR_002627738.1	pseudogene	1	n.567+1046A>C		-1	-1	-1	-1	-1	-1	0
6	45320069	A	C	PASS	intron_variant	MODIFIER	LOC111096362	111096362	transcript	XR_002627739.1	pseudogene	1	n.567+1046A>C		-1	-1	-1	-1	-1	-1	0
6	45320069	A	C	PASS	intron_variant	MODIFIER	LOC111096362	111096362	transcript	XR_002627741.1	pseudogene	1	n.567+1046A>C		-1	-1	-1	-1	-1	-1	0
6	45320069	A	C	PASS	intron_variant	MODIFIER	LOC111096362	111096362	transcript	XR_002627742.1	pseudogene	1	n.567+1046A>C		-1	-1	-1	-1	-1	-1	0
6	45328987	G	A	PASS	intron_variant	MODIFIER	LOC102152190	102152190	transcript	XR_292539.2	pseudogene	3	n.576+7159C>T		-1	-1	-1	-1	-1	-1	0
6	45328987	G	A	PASS	intron_variant	MODIFIER	LOC111096362	111096362	transcript	XR_002627740.1	pseudogene	4	n.1512+6057G>A		-1	-1	-1	-1	-1	-1	0
6	45328987	G	A	PASS	intron_variant	MODIFIER	LOC102152190	102152190	transcript	XR_002627737.1	pseudogene	2	n.271-16186C>T		-1	-1	-1	-1	-1	-1	0
6	45328987	G	A	PASS	intron_variant	MODIFIER	LOC102152190	102152190	transcript	XR_002627735.1	pseudogene	2	n.482-16186C>T		-1	-1	-1	-1	-1	-1	0
6	45328987	G	A	PASS	intron_variant	MODIFIER	LOC102152190	102152190	transcript	XR_002627736.1	pseudogene	3	n.368+7159C>T		-1	-1	-1	-1	-1	-1	0
6	45328987	G	A	PASS	intron_variant	MODIFIER	LOC111096362	111096362	transcript	XR_002627738.1	pseudogene	3	n.885+6057G>A		-1	-1	-1	-1	-1	-1	0
6	45328987	G	A	PASS	intron_variant	MODIFIER	LOC111096362	111096362	transcript	XR_002627739.1	pseudogene	3	n.885+6057G>A		-1	-1	-1	-1	-1	-1	0
6	45328987	G	A	PASS	intron_variant	MODIFIER	LOC111096362	111096362	transcript	XR_002627741.1	pseudogene	2	n.720+7553G>A		-1	-1	-1	-1	-1	-1	0
6	45328987	G	A	PASS	intron_variant	MODIFIER	LOC111096362	111096362	transcript	XR_002627742.1	pseudogene	3	n.885+6057G>A		-1	-1	-1	-1	-1	-1	0
6	45360932	AAC	A	PASS	intron_variant	MODIFIER	LOC102152190	102152190	transcript	XR_292539.2	pseudogene	2	n.485-24697_485-24696delGT		-1	-1	-1	-1	-1	-1	0
6	45360932	AAC	A	PASS	intron_variant	MODIFIER	LOC111096362	111096362	transcript	XR_002627740.1	pseudogene	6	n.1777+2284_1777+2285delAC		-1	-1	-1	-1	-1	-1	0
6	45360932	AAC	A	PASS	intron_variant	MODIFIER	LOC102152190	102152190	transcript	XR_002627737.1	pseudogene	2	n.270+27280_270+27281delGT		-1	-1	-1	-1	-1	-1	0
6	45360932	AAC	A	PASS	intron_variant	MODIFIER	LOC102152190	102152190	transcript	XR_002627735.1	pseudogene	2	n.481+27280_481+27281delGT		-1	-1	-1	-1	-1	-1	0
6	45360932	AAC	A	PASS	intron_variant	MODIFIER	LOC102152190	102152190	transcript	XR_002627736.1	pseudogene	2	n.277-24697_277-24696delGT		-1	-1	-1	-1	-1	-1	0
6	45360932	AAC	A	PASS	intron_variant	MODIFIER	LOC111096362	111096362	transcript	XR_002627738.1	pseudogene	5	n.1150+2284_1150+2285delAC		-1	-1	-1	-1	-1	-1	0
6	45360932	AAC	A	PASS	intron_variant	MODIFIER	LOC111096362	111096362	transcript	XR_002627739.1	pseudogene	5	n.1150+2284_1150+2285delAC		-1	-1	-1	-1	-1	-1	0
6	45360932	AAC	A	PASS	intron_variant	MODIFIER	LOC111096362	111096362	transcript	XR_002627741.1	pseudogene	4	n.985+2284_985+2285delAC		-1	-1	-1	-1	-1	-1	0
6	45360932	AAC	A	PASS	intron_variant	MODIFIER	LOC111096362	111096362	transcript	XR_002627742.1	pseudogene	6	n.1395+2284_1395+2285delAC		-1	-1	-1	-1	-1	-1	0
6	45411264	C	T	PASS	intergenic_region	MODIFIER	LOC102152190-LOC106558908	102152190-106558908	intergenic_region	102152190-106558908		-1	n.45411264C>T		-1	-1	-1	-1	-1	-1	0
6	45470752	G	A	PASS	intergenic_region	MODIFIER	LOC102152190-LOC106558908	102152190-106558908	intergenic_region	102152190-106558908		-1	n.45470752G>A		-1	-1	-1	-1	-1	-1	0
6	45498062	G	A	PASS	intergenic_region	MODIFIER	LOC102152190-LOC106558908	102152190-106558908	intergenic_region	102152190-106558908		-1	n.45498062G>A		-1	-1	-1	-1	-1	-1	0
6	45518190	T	A	PASS	downstream_gene_variant	MODIFIER	LOC106558908	106558908	transcript	106558908	pseudogene	-1	n.*2777A>T		-1	-1	-1	-1	-1	-1	2777
6	45518190	T	A	PASS	intergenic_region	MODIFIER	LOC102152190-LOC106558908	102152190-106558908	intergenic_region	102152190-106558908		-1	n.45518190T>A		-1	-1	-1	-1	-1	-1	0
6	45522761	C	T	PASS	upstream_gene_variant	MODIFIER	LOC106558908	106558908	transcript	106558908	pseudogene	-1	n.-1391G>A		-1	-1	-1	-1	-1	-1	1391
6	45522761	C	T	PASS	intergenic_region	MODIFIER	LOC106558908-LOC111096363	106558908-111096363	intergenic_region	106558908-111096363		-1	n.45522761C>T		-1	-1	-1	-1	-1	-1	0
6	45523233	A	G	PASS	upstream_gene_variant	MODIFIER	LOC106558908	106558908	transcript	106558908	pseudogene	-1	n.-1863T>C		-1	-1	-1	-1	-1	-1	1863
6	45523233	A	G	PASS	intergenic_region	MODIFIER	LOC106558908-LOC111096363	106558908-111096363	intergenic_region	106558908-111096363		-1	n.45523233A>G		-1	-1	-1	-1	-1	-1	0
6	45529837	C	T	PASS	intergenic_region	MODIFIER	LOC106558908-LOC111096363	106558908-111096363	intergenic_region	106558908-111096363		-1	n.45529837C>T		-1	-1	-1	-1	-1	-1	0
6	45558523	C	A	PASS	intergenic_region	MODIFIER	LOC106558908-LOC111096363	106558908-111096363	intergenic_region	106558908-111096363		-1	n.45558523C>A		-1	-1	-1	-1	-1	-1	0
6	45559413	A	T	PASS	intergenic_region	MODIFIER	LOC106558908-LOC111096363	106558908-111096363	intergenic_region	106558908-111096363		-1	n.45559413A>T		-1	-1	-1	-1	-1	-1	0
6	45571186	C	T	PASS	intergenic_region	MODIFIER	LOC106558908-LOC111096363	106558908-111096363	intergenic_region	106558908-111096363		-1	n.45571186C>T		-1	-1	-1	-1	-1	-1	0
6	45595989	T	C	PASS	intergenic_region	MODIFIER	LOC106558908-LOC111096363	106558908-111096363	intergenic_region	106558908-111096363		-1	n.45595989T>C		-1	-1	-1	-1	-1	-1	0
6	45605789	C	CTATCTATCTATCTATT	PASS	intergenic_region	MODIFIER	LOC106558908-LOC111096363	106558908-111096363	intergenic_region	106558908-111096363		-1	n.45605789_45605790insTATCTATCTATCTATT		-1	-1	-1	-1	-1	-1	0
6	45638932	G	A	PASS	intergenic_region	MODIFIER	LOC106558908-LOC111096363	106558908-111096363	intergenic_region	106558908-111096363		-1	n.45638932G>A		-1	-1	-1	-1	-1	-1	0
6	45664597	C	CT	PASS	intergenic_region	MODIFIER	LOC106558908-LOC111096363	106558908-111096363	intergenic_region	106558908-111096363		-1	n.45664597_45664598insT		-1	-1	-1	-1	-1	-1	0
6	45686459	G	A	PASS	intergenic_region	MODIFIER	LOC106558908-LOC111096363	106558908-111096363	intergenic_region	106558908-111096363		-1	n.45686459G>A		-1	-1	-1	-1	-1	-1	0
6	45719590	A	C	PASS	intergenic_region	MODIFIER	LOC106558908-LOC111096363	106558908-111096363	intergenic_region	106558908-111096363		-1	n.45719590A>C		-1	-1	-1	-1	-1	-1	0
6	45732085	T	G	PASS	intergenic_region	MODIFIER	LOC106558908-LOC111096363	106558908-111096363	intergenic_region	106558908-111096363		-1	n.45732085T>G		-1	-1	-1	-1	-1	-1	0
6	45738838	G	A	PASS	intergenic_region	MODIFIER	LOC106558908-LOC111096363	106558908-111096363	intergenic_region	106558908-111096363		-1	n.45738838G>A		-1	-1	-1	-1	-1	-1	0
6	45752511	T	A	PASS	intergenic_region	MODIFIER	LOC106558908-LOC111096363	106558908-111096363	intergenic_region	106558908-111096363		-1	n.45752511T>A		-1	-1	-1	-1	-1	-1	0
6	45766198	C	T	PASS	intergenic_region	MODIFIER	LOC106558908-LOC111096363	106558908-111096363	intergenic_region	106558908-111096363		-1	n.45766198C>T		-1	-1	-1	-1	-1	-1	0
6	45766253	C	T	PASS	intergenic_region	MODIFIER	LOC106558908-LOC111096363	106558908-111096363	intergenic_region	106558908-111096363		-1	n.45766253C>T		-1	-1	-1	-1	-1	-1	0
6	45767639	G	A	PASS	intergenic_region	MODIFIER	LOC106558908-LOC111096363	106558908-111096363	intergenic_region	106558908-111096363		-1	n.45767639G>A		-1	-1	-1	-1	-1	-1	0
6	45768027	G	A	PASS	intergenic_region	MODIFIER	LOC106558908-LOC111096363	106558908-111096363	intergenic_region	106558908-111096363		-1	n.45768027G>A		-1	-1	-1	-1	-1	-1	0
6	45771285	A	AGAT	PASS	intergenic_region	MODIFIER	LOC106558908-LOC111096363	106558908-111096363	intergenic_region	106558908-111096363		-1	n.45771285_45771286insGAT		-1	-1	-1	-1	-1	-1	0
6	45772759	T	A	PASS	intergenic_region	MODIFIER	LOC106558908-LOC111096363	106558908-111096363	intergenic_region	106558908-111096363		-1	n.45772759T>A		-1	-1	-1	-1	-1	-1	0
6	45773650	G	A	PASS	intergenic_region	MODIFIER	LOC106558908-LOC111096363	106558908-111096363	intergenic_region	106558908-111096363		-1	n.45773650G>A		-1	-1	-1	-1	-1	-1	0
6	45775410	C	T	PASS	intergenic_region	MODIFIER	LOC106558908-LOC111096363	106558908-111096363	intergenic_region	106558908-111096363		-1	n.45775410C>T		-1	-1	-1	-1	-1	-1	0
6	45776057	T	C	PASS	intergenic_region	MODIFIER	LOC106558908-LOC111096363	106558908-111096363	intergenic_region	106558908-111096363		-1	n.45776057T>C		-1	-1	-1	-1	-1	-1	0
6	45777578	C	T	PASS	intergenic_region	MODIFIER	LOC106558908-LOC111096363	106558908-111096363	intergenic_region	106558908-111096363		-1	n.45777578C>T		-1	-1	-1	-1	-1	-1	0
6	45778405	A	C	PASS	intergenic_region	MODIFIER	LOC106558908-LOC111096363	106558908-111096363	intergenic_region	106558908-111096363		-1	n.45778405A>C		-1	-1	-1	-1	-1	-1	0
6	45780741	C	T	PASS	intergenic_region	MODIFIER	LOC106558908-LOC111096363	106558908-111096363	intergenic_region	106558908-111096363		-1	n.45780741C>T		-1	-1	-1	-1	-1	-1	0
6	45781682	G	GT	PASS	intergenic_region	MODIFIER	LOC106558908-LOC111096363	106558908-111096363	intergenic_region	106558908-111096363		-1	n.45781682_45781683insT		-1	-1	-1	-1	-1	-1	0
6	45819276	C	T	PASS	intergenic_region	MODIFIER	LOC106558908-LOC111096363	106558908-111096363	intergenic_region	106558908-111096363		-1	n.45819276C>T		-1	-1	-1	-1	-1	-1	0
6	46049441	T	C	PASS	intergenic_region	MODIFIER	LOC106558908-LOC111096363	106558908-111096363	intergenic_region	106558908-111096363		-1	n.46049441T>C		-1	-1	-1	-1	-1	-1	0
6	46075298	G	A	PASS	intergenic_region	MODIFIER	LOC106558908-LOC111096363	106558908-111096363	intergenic_region	106558908-111096363		-1	n.46075298G>A		-1	-1	-1	-1	-1	-1	0
6	46098008	C	T	PASS	intergenic_region	MODIFIER	LOC106558908-LOC111096363	106558908-111096363	intergenic_region	106558908-111096363		-1	n.46098008C>T		-1	-1	-1	-1	-1	-1	0
6	46099489	A	G	PASS	intergenic_region	MODIFIER	LOC106558908-LOC111096363	106558908-111096363	intergenic_region	106558908-111096363		-1	n.46099489A>G		-1	-1	-1	-1	-1	-1	0
6	46174859	G	A	PASS	downstream_gene_variant	MODIFIER	LOC111096363	111096363	transcript	XR_002627750.1	pseudogene	-1	n.*4848C>T		-1	-1	-1	-1	-1	-1	4848
6	46174859	G	A	PASS	intron_variant	MODIFIER	LOC111096363	111096363	transcript	XR_002627761.1	pseudogene	5	n.678-5442C>T		-1	-1	-1	-1	-1	-1	0
6	46174859	G	A	PASS	intron_variant	MODIFIER	LOC111096363	111096363	transcript	XR_002627745.1	pseudogene	5	n.667+6398C>T		-1	-1	-1	-1	-1	-1	0
6	46174859	G	A	PASS	intron_variant	MODIFIER	LOC111096363	111096363	transcript	XR_002627744.1	pseudogene	5	n.667+6398C>T		-1	-1	-1	-1	-1	-1	0
6	46174859	G	A	PASS	intron_variant	MODIFIER	LOC111096363	111096363	transcript	XR_002627743.1	pseudogene	5	n.667+6398C>T		-1	-1	-1	-1	-1	-1	0
6	46174859	G	A	PASS	intron_variant	MODIFIER	LOC111096363	111096363	transcript	XR_002627746.1	pseudogene	5	n.667+6398C>T		-1	-1	-1	-1	-1	-1	0
6	46174859	G	A	PASS	intron_variant	MODIFIER	LOC111096363	111096363	transcript	XR_002627747.1	pseudogene	5	n.667+6398C>T		-1	-1	-1	-1	-1	-1	0
6	46174859	G	A	PASS	intron_variant	MODIFIER	LOC111096363	111096363	transcript	XR_002627748.1	pseudogene	5	n.667+6398C>T		-1	-1	-1	-1	-1	-1	0
6	46174859	G	A	PASS	intron_variant	MODIFIER	LOC111096363	111096363	transcript	XR_002627749.1	pseudogene	4	n.577+6398C>T		-1	-1	-1	-1	-1	-1	0
6	46174859	G	A	PASS	intron_variant	MODIFIER	LOC111096363	111096363	transcript	XR_002627751.1	pseudogene	5	n.668-5442C>T		-1	-1	-1	-1	-1	-1	0
6	46174859	G	A	PASS	intron_variant	MODIFIER	LOC111096363	111096363	transcript	XR_002627752.1	pseudogene	5	n.667+6398C>T		-1	-1	-1	-1	-1	-1	0
6	46174859	G	A	PASS	intron_variant	MODIFIER	LOC111096363	111096363	transcript	XR_002627753.1	pseudogene	5	n.668-5442C>T		-1	-1	-1	-1	-1	-1	0
6	46174859	G	A	PASS	intron_variant	MODIFIER	LOC111096363	111096363	transcript	XR_002627754.1	pseudogene	5	n.667+6398C>T		-1	-1	-1	-1	-1	-1	0
6	46174859	G	A	PASS	intron_variant	MODIFIER	LOC111096363	111096363	transcript	XR_002627756.1	pseudogene	5	n.661+6398C>T		-1	-1	-1	-1	-1	-1	0
6	46174859	G	A	PASS	intron_variant	MODIFIER	LOC111096363	111096363	transcript	XR_002627758.1	pseudogene	5	n.677+6398C>T		-1	-1	-1	-1	-1	-1	0
6	46174859	G	A	PASS	intron_variant	MODIFIER	LOC111096363	111096363	transcript	XR_002627757.1	pseudogene	5	n.667+6398C>T		-1	-1	-1	-1	-1	-1	0
6	46174859	G	A	PASS	intron_variant	MODIFIER	LOC111096363	111096363	transcript	XR_002627762.1	pseudogene	5	n.667+6398C>T		-1	-1	-1	-1	-1	-1	0
6	46174859	G	A	PASS	intron_variant	MODIFIER	LOC111096363	111096363	transcript	XR_002627755.1	pseudogene	5	n.667+6398C>T		-1	-1	-1	-1	-1	-1	0
6	46174859	G	A	PASS	intron_variant	MODIFIER	LOC111096363	111096363	transcript	XR_002627760.1	pseudogene	5	n.667+6398C>T		-1	-1	-1	-1	-1	-1	0
6	46174859	G	A	PASS	intron_variant	MODIFIER	LOC111096363	111096363	transcript	XR_002627763.1	pseudogene	5	n.668-5442C>T		-1	-1	-1	-1	-1	-1	0
6	46227577	T	C	PASS	intergenic_region	MODIFIER	LOC111096509-LOC100683041	111096509-100683041	intergenic_region	111096509-100683041		-1	n.46227577T>C		-1	-1	-1	-1	-1	-1	0
6	46231053	A	G	PASS	intergenic_region	MODIFIER	LOC111096509-LOC100683041	111096509-100683041	intergenic_region	111096509-100683041		-1	n.46231053A>G		-1	-1	-1	-1	-1	-1	0
6	46290233	C	T	PASS	intron_variant	MODIFIER	LOC100685643	100685643	transcript	100685643	pseudogene	1	n.87-1000C>T		-1	-1	-1	-1	-1	-1	0
6	46336065	G	A	PASS	intergenic_region	MODIFIER	LOC100685643-LOC111096510	100685643-111096510	intergenic_region	100685643-111096510		-1	n.46336065G>A		-1	-1	-1	-1	-1	-1	0
6	46375933	GATCCATGCAA	G	PASS	intergenic_region	MODIFIER	LOC111096510-LOC100683118	111096510-100683118	intergenic_region	111096510-100683118		-1	n.46375934_46375943delATCCATGCAA		-1	-1	-1	-1	-1	-1	0
6	46395565	T	C	PASS	intergenic_region	MODIFIER	LOC111096510-LOC100683118	111096510-100683118	intergenic_region	111096510-100683118		-1	n.46395565T>C		-1	-1	-1	-1	-1	-1	0
6	46484567	G	A	PASS	intergenic_region	MODIFIER	LOC111096510-LOC100683118	111096510-100683118	intergenic_region	111096510-100683118		-1	n.46484567G>A		-1	-1	-1	-1	-1	-1	0
6	46511055	A	G	PASS	intergenic_region	MODIFIER	LOC111096510-LOC100683118	111096510-100683118	intergenic_region	111096510-100683118		-1	n.46511055A>G		-1	-1	-1	-1	-1	-1	0
6	46622080	A	G	PASS	downstream_gene_variant	MODIFIER	LOC100683118	100683118	transcript	100683118	pseudogene	-1	n.*467T>C		-1	-1	-1	-1	-1	-1	467
6	46622080	A	G	PASS	intergenic_region	MODIFIER	LOC111096510-LOC100683118	111096510-100683118	intergenic_region	111096510-100683118		-1	n.46622080A>G		-1	-1	-1	-1	-1	-1	0
6	46631363	A	G	PASS	intergenic_region	MODIFIER	LOC100683118-LOC612019	100683118-612019	intergenic_region	100683118-612019		-1	n.46631363A>G		-1	-1	-1	-1	-1	-1	0
6	46633778	A	G	PASS	intergenic_region	MODIFIER	LOC100683118-LOC612019	100683118-612019	intergenic_region	100683118-612019		-1	n.46633778A>G		-1	-1	-1	-1	-1	-1	0
6	46640100	T	C	PASS	intergenic_region	MODIFIER	LOC100683118-LOC612019	100683118-612019	intergenic_region	100683118-612019		-1	n.46640100T>C		-1	-1	-1	-1	-1	-1	0
6	47313808	C	T	PASS	intergenic_region	MODIFIER	LOC111096511-LOC102152700	111096511-102152700	intergenic_region	111096511-102152700		-1	n.47313808C>T		-1	-1	-1	-1	-1	-1	0
6	47552886	T	C	PASS	intron_variant	MODIFIER	COL11A1	100685969	transcript	XM_022420413.1	protein_coding	38	c.2953-1289T>C		-1	-1	-1	-1	-1	-1	0
6	47552886	T	C	PASS	intron_variant	MODIFIER	COL11A1	100685969	transcript	XM_022420411.1	protein_coding	37	c.2800-1289T>C		-1	-1	-1	-1	-1	-1	0
6	47552886	T	C	PASS	intron_variant	MODIFIER	COL11A1	100685969	transcript	XM_005621854.3	protein_coding	38	c.2917-1289T>C		-1	-1	-1	-1	-1	-1	0
6	47552886	T	C	PASS	intron_variant	MODIFIER	COL11A1	100685969	transcript	XM_022420412.1	protein_coding	37	c.2662-1289T>C		-1	-1	-1	-1	-1	-1	0
6	47785210	T	C	PASS	intron_variant	MODIFIER	LOC100686044	100686044	transcript	100686044	pseudogene	1	n.10-2980A>G		-1	-1	-1	-1	-1	-1	0
6	47821204	T	A	PASS	intergenic_region	MODIFIER	LOC100686044-LOC106558952	100686044-106558952	intergenic_region	100686044-106558952		-1	n.47821204T>A		-1	-1	-1	-1	-1	-1	0
6	47855951	A	T	PASS	intergenic_region	MODIFIER	LOC100686044-LOC106558952	100686044-106558952	intergenic_region	100686044-106558952		-1	n.47855951A>T		-1	-1	-1	-1	-1	-1	0
6	47856428	T	A	PASS	intergenic_region	MODIFIER	LOC100686044-LOC106558952	100686044-106558952	intergenic_region	100686044-106558952		-1	n.47856428T>A		-1	-1	-1	-1	-1	-1	0
6	47872168	T	G	PASS	intergenic_region	MODIFIER	LOC100686044-LOC106558952	100686044-106558952	intergenic_region	100686044-106558952		-1	n.47872168T>G		-1	-1	-1	-1	-1	-1	0
6	47872223	A	G	PASS	intergenic_region	MODIFIER	LOC100686044-LOC106558952	100686044-106558952	intergenic_region	100686044-106558952		-1	n.47872223A>G		-1	-1	-1	-1	-1	-1	0
6	47872235	C	CAGTGGAT	PASS	intergenic_region	MODIFIER	LOC100686044-LOC106558952	100686044-106558952	intergenic_region	100686044-106558952		-1	n.47872235_47872236insAGTGGAT		-1	-1	-1	-1	-1	-1	0
6	47872651	A	C	PASS	intergenic_region	MODIFIER	LOC100686044-LOC106558952	100686044-106558952	intergenic_region	100686044-106558952		-1	n.47872651A>C		-1	-1	-1	-1	-1	-1	0
6	47882434	A	G	PASS	intergenic_region	MODIFIER	LOC100686044-LOC106558952	100686044-106558952	intergenic_region	100686044-106558952		-1	n.47882434A>G		-1	-1	-1	-1	-1	-1	0
6	47886573	C	T	PASS	intergenic_region	MODIFIER	LOC100686044-LOC106558952	100686044-106558952	intergenic_region	100686044-106558952		-1	n.47886573C>T		-1	-1	-1	-1	-1	-1	0
6	47896110	G	A	PASS	intergenic_region	MODIFIER	LOC100686044-LOC106558952	100686044-106558952	intergenic_region	100686044-106558952		-1	n.47896110G>A		-1	-1	-1	-1	-1	-1	0
6	47897725	T	A	PASS	intergenic_region	MODIFIER	LOC100686044-LOC106558952	100686044-106558952	intergenic_region	100686044-106558952		-1	n.47897725T>A		-1	-1	-1	-1	-1	-1	0
6	47898496	A	G	PASS	intergenic_region	MODIFIER	LOC100686044-LOC106558952	100686044-106558952	intergenic_region	100686044-106558952		-1	n.47898496A>G		-1	-1	-1	-1	-1	-1	0
6	47899636	G	A	PASS	intergenic_region	MODIFIER	LOC100686044-LOC106558952	100686044-106558952	intergenic_region	100686044-106558952		-1	n.47899636G>A		-1	-1	-1	-1	-1	-1	0
6	47900050	TC	T	PASS	intergenic_region	MODIFIER	LOC100686044-LOC106558952	100686044-106558952	intergenic_region	100686044-106558952		-1	n.47900051delC		-1	-1	-1	-1	-1	-1	0
6	47900469	G	C	PASS	intergenic_region	MODIFIER	LOC100686044-LOC106558952	100686044-106558952	intergenic_region	100686044-106558952		-1	n.47900469G>C		-1	-1	-1	-1	-1	-1	0
6	47902322	G	A	PASS	intergenic_region	MODIFIER	LOC100686044-LOC106558952	100686044-106558952	intergenic_region	100686044-106558952		-1	n.47902322G>A		-1	-1	-1	-1	-1	-1	0
6	47903644	AT	A	PASS	intergenic_region	MODIFIER	LOC100686044-LOC106558952	100686044-106558952	intergenic_region	100686044-106558952		-1	n.47903645delT		-1	-1	-1	-1	-1	-1	0
6	47904177	A	G	PASS	intergenic_region	MODIFIER	LOC100686044-LOC106558952	100686044-106558952	intergenic_region	100686044-106558952		-1	n.47904177A>G		-1	-1	-1	-1	-1	-1	0
6	47905236	C	T	PASS	intergenic_region	MODIFIER	LOC100686044-LOC106558952	100686044-106558952	intergenic_region	100686044-106558952		-1	n.47905236C>T		-1	-1	-1	-1	-1	-1	0
6	47907185	A	G	PASS	intergenic_region	MODIFIER	LOC100686044-LOC106558952	100686044-106558952	intergenic_region	100686044-106558952		-1	n.47907185A>G		-1	-1	-1	-1	-1	-1	0
6	47908417	T	G	PASS	intergenic_region	MODIFIER	LOC100686044-LOC106558952	100686044-106558952	intergenic_region	100686044-106558952		-1	n.47908417T>G		-1	-1	-1	-1	-1	-1	0
6	47912546	A	T	PASS	intergenic_region	MODIFIER	LOC100686044-LOC106558952	100686044-106558952	intergenic_region	100686044-106558952		-1	n.47912546A>T		-1	-1	-1	-1	-1	-1	0
6	47913931	A	G	PASS	intergenic_region	MODIFIER	LOC100686044-LOC106558952	100686044-106558952	intergenic_region	100686044-106558952		-1	n.47913931A>G		-1	-1	-1	-1	-1	-1	0
6	47915004	G	T	PASS	intergenic_region	MODIFIER	LOC100686044-LOC106558952	100686044-106558952	intergenic_region	100686044-106558952		-1	n.47915004G>T		-1	-1	-1	-1	-1	-1	0
6	47915825	G	A	PASS	intergenic_region	MODIFIER	LOC100686044-LOC106558952	100686044-106558952	intergenic_region	100686044-106558952		-1	n.47915825G>A		-1	-1	-1	-1	-1	-1	0
6	47917454	CT	C	PASS	intergenic_region	MODIFIER	LOC100686044-LOC106558952	100686044-106558952	intergenic_region	100686044-106558952		-1	n.47917455delT		-1	-1	-1	-1	-1	-1	0
6	47922314	TTC	T	PASS	intergenic_region	MODIFIER	LOC100686044-LOC106558952	100686044-106558952	intergenic_region	100686044-106558952		-1	n.47922315_47922316delTC		-1	-1	-1	-1	-1	-1	0
6	47922319	T	C	PASS	intergenic_region	MODIFIER	LOC100686044-LOC106558952	100686044-106558952	intergenic_region	100686044-106558952		-1	n.47922319T>C		-1	-1	-1	-1	-1	-1	0
6	47962227	CTCTT	C	PASS	intergenic_region	MODIFIER	LOC111096367-OLFM3	111096367-490137	intergenic_region	111096367-490137		-1	n.47962228_47962231delTCTT		-1	-1	-1	-1	-1	-1	0
6	47976205	T	A	PASS	intergenic_region	MODIFIER	LOC111096367-OLFM3	111096367-490137	intergenic_region	111096367-490137		-1	n.47976205T>A		-1	-1	-1	-1	-1	-1	0
6	47983421	T	A	PASS	intergenic_region	MODIFIER	LOC111096367-OLFM3	111096367-490137	intergenic_region	111096367-490137		-1	n.47983421T>A		-1	-1	-1	-1	-1	-1	0
6	47993741	T	C	PASS	intergenic_region	MODIFIER	LOC111096367-OLFM3	111096367-490137	intergenic_region	111096367-490137		-1	n.47993741T>C		-1	-1	-1	-1	-1	-1	0
6	48059212	G	A	PASS	intergenic_region	MODIFIER	LOC111096367-OLFM3	111096367-490137	intergenic_region	111096367-490137		-1	n.48059212G>A		-1	-1	-1	-1	-1	-1	0
6	48093823	T	A	PASS	intergenic_region	MODIFIER	LOC111096367-OLFM3	111096367-490137	intergenic_region	111096367-490137		-1	n.48093823T>A		-1	-1	-1	-1	-1	-1	0
6	48181162	C	T	PASS	intergenic_region	MODIFIER	LOC111096367-OLFM3	111096367-490137	intergenic_region	111096367-490137		-1	n.48181162C>T		-1	-1	-1	-1	-1	-1	0
6	48215878	C	T	PASS	intergenic_region	MODIFIER	LOC111096367-OLFM3	111096367-490137	intergenic_region	111096367-490137		-1	n.48215878C>T		-1	-1	-1	-1	-1	-1	0
6	48232629	T	A	PASS	intergenic_region	MODIFIER	LOC111096367-OLFM3	111096367-490137	intergenic_region	111096367-490137		-1	n.48232629T>A		-1	-1	-1	-1	-1	-1	0
6	48266439	G	GA	PASS	intron_variant	MODIFIER	OLFM3	490137	transcript	XM_005621855.3	protein_coding	1	c.69+6826_69+6827insA		-1	-1	-1	-1	-1	-1	0
6	48280825	T	G	PASS	intron_variant	MODIFIER	OLFM3	490137	transcript	XM_005621855.3	protein_coding	1	c.69+21212T>G		-1	-1	-1	-1	-1	-1	0
6	48535852	G	A	PASS	intergenic_region	MODIFIER	OLFM3-LOC111096512	490137-111096512	intergenic_region	490137-111096512		-1	n.48535852G>A		-1	-1	-1	-1	-1	-1	0
6	50021358	A	AGAGTCTGCTTGTCCCTTTCTCTCCTCTGTACATTCTCTTGCTCTCTCT	PASS	intergenic_region	MODIFIER	SLC35A3-AGL	442991-479931	intergenic_region	442991-479931		-1	n.50021358_50021359insGAGTCTGCTTGTCCCTTTCTCTCCTCTGTACATTCTCTTGCTCTCTCT		-1	-1	-1	-1	-1	-1	0
6	50421952	G	T	PASS	intergenic_region	MODIFIER	LOC100687197-TRNAA-UGC	100687197-111096563	intergenic_region	100687197-111096563		-1	n.50421952G>T		-1	-1	-1	-1	-1	-1	0
6	50593862	TCGCCCCTGGGACACCCGCCCGGGGGCACC	T	PASS	intron_variant	MODIFIER	PLPPR4	490146	transcript	XM_003639094.4	protein_coding	1	c.78+290_78+318delGGTGCCCCCGGGCGGGTGTCCCAGGGGCG		-1	-1	-1	-1	-1	-1	0
6	50995368	C	T	PASS	intergenic_region	MODIFIER	PLPPR5-SNX7	479934-490148	intergenic_region	479934-490148		-1	n.50995368C>T		-1	-1	-1	-1	-1	-1	0
6	52093518	C	T	PASS	intron_variant	MODIFIER	DPYD	479935	transcript	XM_022420437.1	protein_coding	8	c.773-19850C>T		-1	-1	-1	-1	-1	-1	0
6	52093518	C	T	PASS	intron_variant	MODIFIER	DPYD	479935	transcript	XM_022420438.1	protein_coding	7	c.509-19850C>T		-1	-1	-1	-1	-1	-1	0
6	53210438	G	T	PASS	intergenic_region	MODIFIER	LOC100687974-LOC102156045	100687974-102156045	intergenic_region	100687974-102156045		-1	n.53210438G>T		-1	-1	-1	-1	-1	-1	0
6	54918184	T	TTTTTTTTTTAATTTATTTATGTATGTATGTATGATATTCACACAGAGAGAGAGAGAGAGAGAGAGAGGCAGAGACAC	PASS	intergenic_region	MODIFIER	LOC111096388-ARHGAP29	111096388-479940	intergenic_region	111096388-479940		-1	n.54918184_54918185insTTTTTTTTTAATTTATTTATGTATGTATGTATGATATTCACACAGAGAGAGAGAGAGAGAGAGAGAGGCAGAGACAC		-1	-1	-1	-1	-1	-1	0
6	55759831	C	A	PASS	downstream_gene_variant	MODIFIER	LOC100688990	100688990	transcript	100688990	pseudogene	-1	n.*4454G>T		-1	-1	-1	-1	-1	-1	4454
6	55759831	C	A	PASS	intergenic_region	MODIFIER	DR1-LOC100688990	479943-100688990	intergenic_region	479943-100688990		-1	n.55759831C>A		-1	-1	-1	-1	-1	-1	0
6	59335071	C	CCCCG	PASS	intron_variant	MODIFIER	LOC612426	612426	transcript	XM_022420697.1	protein_coding	6	c.560+615_560+616insCCCG		-1	-1	-1	-1	-1	-1	0	WARNING_TRANSCRIPT_MULTIPLE_STOP_CODONS
6	59335078	A	T	PASS	intron_variant	MODIFIER	LOC612426	612426	transcript	XM_022420697.1	protein_coding	6	c.560+622A>T		-1	-1	-1	-1	-1	-1	0	WARNING_TRANSCRIPT_MULTIPLE_STOP_CODONS
6	59513974	T	TA	PASS	downstream_gene_variant	MODIFIER	LOC111096410	111096410	transcript	111096410	pseudogene	-1	n.*4138_*4139insA		-1	-1	-1	-1	-1	-1	4139
6	59513974	T	TA	PASS	intron_variant	MODIFIER	GTF2B	479960	transcript	XM_537085.6	protein_coding	2	c.125-1484_125-1483insA		-1	-1	-1	-1	-1	-1	0
6	59513976	T	TTAATCTTTACTGTCTTTAAACTGTAAGGTTA	PASS	downstream_gene_variant	MODIFIER	LOC111096410	111096410	transcript	111096410	pseudogene	-1	n.*4140_*4141insTAATCTTTACTGTCTTTAAACTGTAAGGTTA		-1	-1	-1	-1	-1	-1	4141
6	59513976	T	TTAATCTTTACTGTCTTTAAACTGTAAGGTTA	PASS	intron_variant	MODIFIER	GTF2B	479960	transcript	XM_537085.6	protein_coding	2	c.125-1482_125-1481insTAATCTTTACTGTCTTTAAACTGTAAGGTTA		-1	-1	-1	-1	-1	-1	0
6	60197167	C	T	PASS	intron_variant	MODIFIER	LOC102152020	102152020	transcript	XR_002627873.1	pseudogene	5	n.626-45389C>T		-1	-1	-1	-1	-1	-1	0
6	60197167	C	T	PASS	intron_variant	MODIFIER	LOC111096411	111096411	transcript	XR_002627874.1	pseudogene	1	n.503+3712G>A		-1	-1	-1	-1	-1	-1	0
6	60197167	C	T	PASS	intron_variant	MODIFIER	LOC111096411	111096411	transcript	XR_002627875.1	pseudogene	1	n.496+3712G>A		-1	-1	-1	-1	-1	-1	0
6	60240848	G	A	PASS	intron_variant	MODIFIER	LOC102152020	102152020	transcript	XR_002627873.1	pseudogene	5	n.626-1708G>A		-1	-1	-1	-1	-1	-1	0
6	60394777	CAGAG	C	PASS	intergenic_region	MODIFIER	LOC102152020-LOC102152083	102152020-102152083	intergenic_region	102152020-102152083		-1	n.60394778_60394781delAGAG		-1	-1	-1	-1	-1	-1	0
6	60429916	T	C	PASS	intergenic_region	MODIFIER	LOC102152020-LOC102152083	102152020-102152083	intergenic_region	102152020-102152083		-1	n.60429916T>C		-1	-1	-1	-1	-1	-1	0
6	60456193	A	T	PASS	intergenic_region	MODIFIER	LOC102152020-LOC102152083	102152020-102152083	intergenic_region	102152020-102152083		-1	n.60456193A>T		-1	-1	-1	-1	-1	-1	0
6	60457290	A	G	PASS	intergenic_region	MODIFIER	LOC102152020-LOC102152083	102152020-102152083	intergenic_region	102152020-102152083		-1	n.60457290A>G		-1	-1	-1	-1	-1	-1	0
6	60460943	TTTTA	T	PASS	intergenic_region	MODIFIER	LOC102152020-LOC102152083	102152020-102152083	intergenic_region	102152020-102152083		-1	n.60460944_60460947delTTTA		-1	-1	-1	-1	-1	-1	0
6	60491225	A	G	PASS	upstream_gene_variant	MODIFIER	LOC111096412	111096412	transcript	XR_002627876.1	pseudogene	-1	n.-3067T>C		-1	-1	-1	-1	-1	-1	3067
6	60491225	A	G	PASS	intron_variant	MODIFIER	LOC102152083	102152083	transcript	XR_292583.3	pseudogene	1	n.474+23939A>G		-1	-1	-1	-1	-1	-1	0
6	60491225	A	G	PASS	intron_variant	MODIFIER	LOC102152083	102152083	transcript	XR_002627877.1	pseudogene	1	n.472+23939A>G		-1	-1	-1	-1	-1	-1	0
6	60491329	G	A	PASS	upstream_gene_variant	MODIFIER	LOC111096412	111096412	transcript	XR_002627876.1	pseudogene	-1	n.-3171C>T		-1	-1	-1	-1	-1	-1	3171
6	60491329	G	A	PASS	intron_variant	MODIFIER	LOC102152083	102152083	transcript	XR_292583.3	pseudogene	1	n.474+24043G>A		-1	-1	-1	-1	-1	-1	0
6	60491329	G	A	PASS	intron_variant	MODIFIER	LOC102152083	102152083	transcript	XR_002627877.1	pseudogene	1	n.472+24043G>A		-1	-1	-1	-1	-1	-1	0
6	60491538	C	T	PASS	upstream_gene_variant	MODIFIER	LOC111096412	111096412	transcript	XR_002627876.1	pseudogene	-1	n.-3380G>A		-1	-1	-1	-1	-1	-1	3380
6	60491538	C	T	PASS	intron_variant	MODIFIER	LOC102152083	102152083	transcript	XR_292583.3	pseudogene	1	n.474+24252C>T		-1	-1	-1	-1	-1	-1	0
6	60491538	C	T	PASS	intron_variant	MODIFIER	LOC102152083	102152083	transcript	XR_002627877.1	pseudogene	1	n.472+24252C>T		-1	-1	-1	-1	-1	-1	0
6	60492090	C	CTAA	PASS	upstream_gene_variant	MODIFIER	LOC111096412	111096412	transcript	XR_002627876.1	pseudogene	-1	n.-3933_-3932insTTA		-1	-1	-1	-1	-1	-1	3933
6	60492090	C	CTAA	PASS	intron_variant	MODIFIER	LOC102152083	102152083	transcript	XR_292583.3	pseudogene	1	n.474+24804_474+24805insTAA		-1	-1	-1	-1	-1	-1	0
6	60492090	C	CTAA	PASS	intron_variant	MODIFIER	LOC102152083	102152083	transcript	XR_002627877.1	pseudogene	1	n.472+24804_472+24805insTAA		-1	-1	-1	-1	-1	-1	0
6	60492643	G	A	PASS	upstream_gene_variant	MODIFIER	LOC111096412	111096412	transcript	XR_002627876.1	pseudogene	-1	n.-4485C>T		-1	-1	-1	-1	-1	-1	4485
6	60492643	G	A	PASS	intron_variant	MODIFIER	LOC102152083	102152083	transcript	XR_292583.3	pseudogene	1	n.474+25357G>A		-1	-1	-1	-1	-1	-1	0
6	60492643	G	A	PASS	intron_variant	MODIFIER	LOC102152083	102152083	transcript	XR_002627877.1	pseudogene	1	n.472+25357G>A		-1	-1	-1	-1	-1	-1	0
6	60492767	C	T	PASS	upstream_gene_variant	MODIFIER	LOC111096412	111096412	transcript	XR_002627876.1	pseudogene	-1	n.-4609G>A		-1	-1	-1	-1	-1	-1	4609
6	60492767	C	T	PASS	intron_variant	MODIFIER	LOC102152083	102152083	transcript	XR_292583.3	pseudogene	1	n.474+25481C>T		-1	-1	-1	-1	-1	-1	0
6	60492767	C	T	PASS	intron_variant	MODIFIER	LOC102152083	102152083	transcript	XR_002627877.1	pseudogene	1	n.472+25481C>T		-1	-1	-1	-1	-1	-1	0
6	60493620	G	T	PASS	intron_variant	MODIFIER	LOC102152083	102152083	transcript	XR_292583.3	pseudogene	1	n.474+26334G>T		-1	-1	-1	-1	-1	-1	0
6	60493620	G	T	PASS	intron_variant	MODIFIER	LOC102152083	102152083	transcript	XR_002627877.1	pseudogene	1	n.472+26334G>T		-1	-1	-1	-1	-1	-1	0
6	60493816	A	G	PASS	intron_variant	MODIFIER	LOC102152083	102152083	transcript	XR_292583.3	pseudogene	1	n.474+26530A>G		-1	-1	-1	-1	-1	-1	0
6	60493816	A	G	PASS	intron_variant	MODIFIER	LOC102152083	102152083	transcript	XR_002627877.1	pseudogene	1	n.472+26530A>G		-1	-1	-1	-1	-1	-1	0
6	60494522	C	T	PASS	intron_variant	MODIFIER	LOC102152083	102152083	transcript	XR_292583.3	pseudogene	1	n.474+27236C>T		-1	-1	-1	-1	-1	-1	0
6	60494522	C	T	PASS	intron_variant	MODIFIER	LOC102152083	102152083	transcript	XR_002627877.1	pseudogene	1	n.472+27236C>T		-1	-1	-1	-1	-1	-1	0
6	60495048	C	T	PASS	intron_variant	MODIFIER	LOC102152083	102152083	transcript	XR_292583.3	pseudogene	1	n.474+27762C>T		-1	-1	-1	-1	-1	-1	0
6	60495048	C	T	PASS	intron_variant	MODIFIER	LOC102152083	102152083	transcript	XR_002627877.1	pseudogene	1	n.472+27762C>T		-1	-1	-1	-1	-1	-1	0
6	60495403	C	T	PASS	intron_variant	MODIFIER	LOC102152083	102152083	transcript	XR_292583.3	pseudogene	1	n.474+28117C>T		-1	-1	-1	-1	-1	-1	0
6	60495403	C	T	PASS	intron_variant	MODIFIER	LOC102152083	102152083	transcript	XR_002627877.1	pseudogene	1	n.472+28117C>T		-1	-1	-1	-1	-1	-1	0
6	60495522	C	T	PASS	intron_variant	MODIFIER	LOC102152083	102152083	transcript	XR_292583.3	pseudogene	1	n.474+28236C>T		-1	-1	-1	-1	-1	-1	0
6	60495522	C	T	PASS	intron_variant	MODIFIER	LOC102152083	102152083	transcript	XR_002627877.1	pseudogene	1	n.472+28236C>T		-1	-1	-1	-1	-1	-1	0
6	60496319	G	A	PASS	intron_variant	MODIFIER	LOC102152083	102152083	transcript	XR_292583.3	pseudogene	1	n.474+29033G>A		-1	-1	-1	-1	-1	-1	0
6	60496319	G	A	PASS	intron_variant	MODIFIER	LOC102152083	102152083	transcript	XR_002627877.1	pseudogene	1	n.472+29033G>A		-1	-1	-1	-1	-1	-1	0
6	60496507	T	TCTAAAA	PASS	intron_variant	MODIFIER	LOC102152083	102152083	transcript	XR_292583.3	pseudogene	1	n.474+29221_474+29222insCTAAAA		-1	-1	-1	-1	-1	-1	0
6	60496507	T	TCTAAAA	PASS	intron_variant	MODIFIER	LOC102152083	102152083	transcript	XR_002627877.1	pseudogene	1	n.472+29221_472+29222insCTAAAA		-1	-1	-1	-1	-1	-1	0
6	60496578	T	C	PASS	intron_variant	MODIFIER	LOC102152083	102152083	transcript	XR_292583.3	pseudogene	1	n.474+29292T>C		-1	-1	-1	-1	-1	-1	0
6	60496578	T	C	PASS	intron_variant	MODIFIER	LOC102152083	102152083	transcript	XR_002627877.1	pseudogene	1	n.472+29292T>C		-1	-1	-1	-1	-1	-1	0
6	60498298	A	C	PASS	intron_variant	MODIFIER	LOC102152083	102152083	transcript	XR_292583.3	pseudogene	1	n.474+31012A>C		-1	-1	-1	-1	-1	-1	0
6	60498298	A	C	PASS	intron_variant	MODIFIER	LOC102152083	102152083	transcript	XR_002627877.1	pseudogene	1	n.472+31012A>C		-1	-1	-1	-1	-1	-1	0
6	60498350	C	T	PASS	intron_variant	MODIFIER	LOC102152083	102152083	transcript	XR_292583.3	pseudogene	1	n.474+31064C>T		-1	-1	-1	-1	-1	-1	0
6	60498350	C	T	PASS	intron_variant	MODIFIER	LOC102152083	102152083	transcript	XR_002627877.1	pseudogene	1	n.472+31064C>T		-1	-1	-1	-1	-1	-1	0
6	60498419	G	A	PASS	intron_variant	MODIFIER	LOC102152083	102152083	transcript	XR_292583.3	pseudogene	1	n.474+31133G>A		-1	-1	-1	-1	-1	-1	0
6	60498419	G	A	PASS	intron_variant	MODIFIER	LOC102152083	102152083	transcript	XR_002627877.1	pseudogene	1	n.472+31133G>A		-1	-1	-1	-1	-1	-1	0
6	60498673	G	A	PASS	intron_variant	MODIFIER	LOC102152083	102152083	transcript	XR_292583.3	pseudogene	1	n.474+31387G>A		-1	-1	-1	-1	-1	-1	0
6	60498673	G	A	PASS	intron_variant	MODIFIER	LOC102152083	102152083	transcript	XR_002627877.1	pseudogene	1	n.472+31387G>A		-1	-1	-1	-1	-1	-1	0
6	60505149	C	T	PASS	intron_variant	MODIFIER	LOC102152083	102152083	transcript	XR_292583.3	pseudogene	1	n.475-37081C>T		-1	-1	-1	-1	-1	-1	0
6	60505149	C	T	PASS	intron_variant	MODIFIER	LOC102152083	102152083	transcript	XR_002627877.1	pseudogene	1	n.473-37208C>T		-1	-1	-1	-1	-1	-1	0
6	60505411	A	AT	PASS	intron_variant	MODIFIER	LOC102152083	102152083	transcript	XR_292583.3	pseudogene	1	n.475-36819_475-36818insT		-1	-1	-1	-1	-1	-1	0
6	60505411	A	AT	PASS	intron_variant	MODIFIER	LOC102152083	102152083	transcript	XR_002627877.1	pseudogene	1	n.473-36946_473-36945insT		-1	-1	-1	-1	-1	-1	0
6	60505742	C	T	PASS	intron_variant	MODIFIER	LOC102152083	102152083	transcript	XR_292583.3	pseudogene	1	n.475-36488C>T		-1	-1	-1	-1	-1	-1	0
6	60505742	C	T	PASS	intron_variant	MODIFIER	LOC102152083	102152083	transcript	XR_002627877.1	pseudogene	1	n.473-36615C>T		-1	-1	-1	-1	-1	-1	0
6	60506254	T	TC	PASS	intron_variant	MODIFIER	LOC102152083	102152083	transcript	XR_292583.3	pseudogene	1	n.475-35976_475-35975insC		-1	-1	-1	-1	-1	-1	0
6	60506254	T	TC	PASS	intron_variant	MODIFIER	LOC102152083	102152083	transcript	XR_002627877.1	pseudogene	1	n.473-36103_473-36102insC		-1	-1	-1	-1	-1	-1	0
6	60506381	C	T	PASS	intron_variant	MODIFIER	LOC102152083	102152083	transcript	XR_292583.3	pseudogene	1	n.475-35849C>T		-1	-1	-1	-1	-1	-1	0
6	60506381	C	T	PASS	intron_variant	MODIFIER	LOC102152083	102152083	transcript	XR_002627877.1	pseudogene	1	n.473-35976C>T		-1	-1	-1	-1	-1	-1	0
6	60508000	G	A	PASS	intron_variant	MODIFIER	LOC102152083	102152083	transcript	XR_292583.3	pseudogene	1	n.475-34230G>A		-1	-1	-1	-1	-1	-1	0
6	60508000	G	A	PASS	intron_variant	MODIFIER	LOC102152083	102152083	transcript	XR_002627877.1	pseudogene	1	n.473-34357G>A		-1	-1	-1	-1	-1	-1	0
6	60508893	C	G	PASS	intron_variant	MODIFIER	LOC102152083	102152083	transcript	XR_292583.3	pseudogene	1	n.475-33337C>G		-1	-1	-1	-1	-1	-1	0
6	60508893	C	G	PASS	intron_variant	MODIFIER	LOC102152083	102152083	transcript	XR_002627877.1	pseudogene	1	n.473-33464C>G		-1	-1	-1	-1	-1	-1	0
6	60509071	T	C	PASS	intron_variant	MODIFIER	LOC102152083	102152083	transcript	XR_292583.3	pseudogene	1	n.475-33159T>C		-1	-1	-1	-1	-1	-1	0
6	60509071	T	C	PASS	intron_variant	MODIFIER	LOC102152083	102152083	transcript	XR_002627877.1	pseudogene	1	n.473-33286T>C		-1	-1	-1	-1	-1	-1	0
6	60509124	G	A	PASS	intron_variant	MODIFIER	LOC102152083	102152083	transcript	XR_292583.3	pseudogene	1	n.475-33106G>A		-1	-1	-1	-1	-1	-1	0
6	60509124	G	A	PASS	intron_variant	MODIFIER	LOC102152083	102152083	transcript	XR_002627877.1	pseudogene	1	n.473-33233G>A		-1	-1	-1	-1	-1	-1	0
6	60509265	A	T	PASS	intron_variant	MODIFIER	LOC102152083	102152083	transcript	XR_292583.3	pseudogene	1	n.475-32965A>T		-1	-1	-1	-1	-1	-1	0
6	60509265	A	T	PASS	intron_variant	MODIFIER	LOC102152083	102152083	transcript	XR_002627877.1	pseudogene	1	n.473-33092A>T		-1	-1	-1	-1	-1	-1	0
6	60509817	C	T	PASS	intron_variant	MODIFIER	LOC102152083	102152083	transcript	XR_292583.3	pseudogene	1	n.475-32413C>T		-1	-1	-1	-1	-1	-1	0
6	60509817	C	T	PASS	intron_variant	MODIFIER	LOC102152083	102152083	transcript	XR_002627877.1	pseudogene	1	n.473-32540C>T		-1	-1	-1	-1	-1	-1	0
6	60510840	C	A	PASS	intron_variant	MODIFIER	LOC102152083	102152083	transcript	XR_292583.3	pseudogene	1	n.475-31390C>A		-1	-1	-1	-1	-1	-1	0
6	60510840	C	A	PASS	intron_variant	MODIFIER	LOC102152083	102152083	transcript	XR_002627877.1	pseudogene	1	n.473-31517C>A		-1	-1	-1	-1	-1	-1	0
6	60511098	G	A	PASS	intron_variant	MODIFIER	LOC102152083	102152083	transcript	XR_292583.3	pseudogene	1	n.475-31132G>A		-1	-1	-1	-1	-1	-1	0
6	60511098	G	A	PASS	intron_variant	MODIFIER	LOC102152083	102152083	transcript	XR_002627877.1	pseudogene	1	n.473-31259G>A		-1	-1	-1	-1	-1	-1	0
6	60511111	T	C	PASS	intron_variant	MODIFIER	LOC102152083	102152083	transcript	XR_292583.3	pseudogene	1	n.475-31119T>C		-1	-1	-1	-1	-1	-1	0
6	60511111	T	C	PASS	intron_variant	MODIFIER	LOC102152083	102152083	transcript	XR_002627877.1	pseudogene	1	n.473-31246T>C		-1	-1	-1	-1	-1	-1	0
6	60515349	T	A	PASS	intron_variant	MODIFIER	LOC102152083	102152083	transcript	XR_292583.3	pseudogene	1	n.475-26881T>A		-1	-1	-1	-1	-1	-1	0
6	60515349	T	A	PASS	intron_variant	MODIFIER	LOC102152083	102152083	transcript	XR_002627877.1	pseudogene	1	n.473-27008T>A		-1	-1	-1	-1	-1	-1	0
6	60520149	T	C	PASS	intron_variant	MODIFIER	LOC102152083	102152083	transcript	XR_292583.3	pseudogene	1	n.475-22081T>C		-1	-1	-1	-1	-1	-1	0
6	60520149	T	C	PASS	intron_variant	MODIFIER	LOC102152083	102152083	transcript	XR_002627877.1	pseudogene	1	n.473-22208T>C		-1	-1	-1	-1	-1	-1	0
6	60521243	G	A	PASS	intron_variant	MODIFIER	LOC102152083	102152083	transcript	XR_292583.3	pseudogene	1	n.475-20987G>A		-1	-1	-1	-1	-1	-1	0
6	60521243	G	A	PASS	intron_variant	MODIFIER	LOC102152083	102152083	transcript	XR_002627877.1	pseudogene	1	n.473-21114G>A		-1	-1	-1	-1	-1	-1	0
6	60521663	CATA	C	PASS	intron_variant	MODIFIER	LOC102152083	102152083	transcript	XR_292583.3	pseudogene	1	n.475-20566_475-20564delATA		-1	-1	-1	-1	-1	-1	0
6	60521663	CATA	C	PASS	intron_variant	MODIFIER	LOC102152083	102152083	transcript	XR_002627877.1	pseudogene	1	n.473-20693_473-20691delATA		-1	-1	-1	-1	-1	-1	0
6	60522326	C	T	PASS	intron_variant	MODIFIER	LOC102152083	102152083	transcript	XR_292583.3	pseudogene	1	n.475-19904C>T		-1	-1	-1	-1	-1	-1	0
6	60522326	C	T	PASS	intron_variant	MODIFIER	LOC102152083	102152083	transcript	XR_002627877.1	pseudogene	1	n.473-20031C>T		-1	-1	-1	-1	-1	-1	0
6	60523261	A	G	PASS	intron_variant	MODIFIER	LOC102152083	102152083	transcript	XR_292583.3	pseudogene	1	n.475-18969A>G		-1	-1	-1	-1	-1	-1	0
6	60523261	A	G	PASS	intron_variant	MODIFIER	LOC102152083	102152083	transcript	XR_002627877.1	pseudogene	1	n.473-19096A>G		-1	-1	-1	-1	-1	-1	0
6	60527276	C	T	PASS	intron_variant	MODIFIER	LOC102152083	102152083	transcript	XR_292583.3	pseudogene	1	n.475-14954C>T		-1	-1	-1	-1	-1	-1	0
6	60527276	C	T	PASS	intron_variant	MODIFIER	LOC102152083	102152083	transcript	XR_002627877.1	pseudogene	1	n.473-15081C>T		-1	-1	-1	-1	-1	-1	0
6	60527484	G	T	PASS	intron_variant	MODIFIER	LOC102152083	102152083	transcript	XR_292583.3	pseudogene	1	n.475-14746G>T		-1	-1	-1	-1	-1	-1	0
6	60527484	G	T	PASS	intron_variant	MODIFIER	LOC102152083	102152083	transcript	XR_002627877.1	pseudogene	1	n.473-14873G>T		-1	-1	-1	-1	-1	-1	0
6	60528414	G	A	PASS	intron_variant	MODIFIER	LOC102152083	102152083	transcript	XR_292583.3	pseudogene	1	n.475-13816G>A		-1	-1	-1	-1	-1	-1	0
6	60528414	G	A	PASS	intron_variant	MODIFIER	LOC102152083	102152083	transcript	XR_002627877.1	pseudogene	1	n.473-13943G>A		-1	-1	-1	-1	-1	-1	0
6	60539134	C	T	PASS	intron_variant	MODIFIER	LOC102152083	102152083	transcript	XR_292583.3	pseudogene	1	n.475-3096C>T		-1	-1	-1	-1	-1	-1	0
6	60539134	C	T	PASS	intron_variant	MODIFIER	LOC102152083	102152083	transcript	XR_002627877.1	pseudogene	1	n.473-3223C>T		-1	-1	-1	-1	-1	-1	0
6	60544185	TAG	T	PASS	intron_variant	MODIFIER	LOC102152083	102152083	transcript	XR_292583.3	pseudogene	2	n.739+1692_739+1693delAG		-1	-1	-1	-1	-1	-1	0
6	60544185	TAG	T	PASS	intron_variant	MODIFIER	LOC102152083	102152083	transcript	XR_002627877.1	pseudogene	2	n.610+1692_610+1693delAG		-1	-1	-1	-1	-1	-1	0
6	60546212	A	C	PASS	intron_variant	MODIFIER	LOC102152083	102152083	transcript	XR_292583.3	pseudogene	2	n.740-2225A>C		-1	-1	-1	-1	-1	-1	0
6	60546212	A	C	PASS	intron_variant	MODIFIER	LOC102152083	102152083	transcript	XR_002627877.1	pseudogene	2	n.611-2225A>C		-1	-1	-1	-1	-1	-1	0
6	60547970	C	T	PASS	intron_variant	MODIFIER	LOC102152083	102152083	transcript	XR_292583.3	pseudogene	2	n.740-467C>T		-1	-1	-1	-1	-1	-1	0
6	60547970	C	T	PASS	intron_variant	MODIFIER	LOC102152083	102152083	transcript	XR_002627877.1	pseudogene	2	n.611-467C>T		-1	-1	-1	-1	-1	-1	0
6	60548158	C	T	PASS	intron_variant	MODIFIER	LOC102152083	102152083	transcript	XR_292583.3	pseudogene	2	n.740-279C>T		-1	-1	-1	-1	-1	-1	0
6	60548158	C	T	PASS	intron_variant	MODIFIER	LOC102152083	102152083	transcript	XR_002627877.1	pseudogene	2	n.611-279C>T		-1	-1	-1	-1	-1	-1	0
6	60548637	A	G	PASS	non_coding_transcript_exon_variant	MODIFIER	LOC102152083	102152083	transcript	XR_292583.3	pseudogene	3	n.940A>G		-1	-1	-1	-1	-1	-1	0
6	60548637	A	G	PASS	non_coding_transcript_exon_variant	MODIFIER	LOC102152083	102152083	transcript	XR_002627877.1	pseudogene	3	n.811A>G		-1	-1	-1	-1	-1	-1	0
6	60549886	C	T	PASS	non_coding_transcript_exon_variant	MODIFIER	LOC102152083	102152083	transcript	XR_292583.3	pseudogene	3	n.2189C>T		-1	-1	-1	-1	-1	-1	0
6	60549886	C	T	PASS	non_coding_transcript_exon_variant	MODIFIER	LOC102152083	102152083	transcript	XR_002627877.1	pseudogene	3	n.2060C>T		-1	-1	-1	-1	-1	-1	0
6	60551798	C	G	PASS	downstream_gene_variant	MODIFIER	LOC102152083	102152083	transcript	XR_292583.3	pseudogene	-1	n.*587C>G		-1	-1	-1	-1	-1	-1	587
6	60551798	C	G	PASS	downstream_gene_variant	MODIFIER	LOC102152083	102152083	transcript	XR_002627877.1	pseudogene	-1	n.*587C>G		-1	-1	-1	-1	-1	-1	587
6	60551798	C	G	PASS	intergenic_region	MODIFIER	LOC102152083-LOC106558973	102152083-106558973	intergenic_region	102152083-106558973		-1	n.60551798C>G		-1	-1	-1	-1	-1	-1	0
6	60553205	C	T	PASS	downstream_gene_variant	MODIFIER	LOC102152083	102152083	transcript	XR_292583.3	pseudogene	-1	n.*1994C>T		-1	-1	-1	-1	-1	-1	1994
6	60553205	C	T	PASS	downstream_gene_variant	MODIFIER	LOC102152083	102152083	transcript	XR_002627877.1	pseudogene	-1	n.*1994C>T		-1	-1	-1	-1	-1	-1	1994
6	60553205	C	T	PASS	intergenic_region	MODIFIER	LOC102152083-LOC106558973	102152083-106558973	intergenic_region	102152083-106558973		-1	n.60553205C>T		-1	-1	-1	-1	-1	-1	0
6	60553610	A	T	PASS	downstream_gene_variant	MODIFIER	LOC102152083	102152083	transcript	XR_292583.3	pseudogene	-1	n.*2399A>T		-1	-1	-1	-1	-1	-1	2399
6	60553610	A	T	PASS	downstream_gene_variant	MODIFIER	LOC102152083	102152083	transcript	XR_002627877.1	pseudogene	-1	n.*2399A>T		-1	-1	-1	-1	-1	-1	2399
6	60553610	A	T	PASS	intergenic_region	MODIFIER	LOC102152083-LOC106558973	102152083-106558973	intergenic_region	102152083-106558973		-1	n.60553610A>T		-1	-1	-1	-1	-1	-1	0
6	60554810	C	G	PASS	downstream_gene_variant	MODIFIER	LOC102152083	102152083	transcript	XR_292583.3	pseudogene	-1	n.*3599C>G		-1	-1	-1	-1	-1	-1	3599
6	60554810	C	G	PASS	downstream_gene_variant	MODIFIER	LOC102152083	102152083	transcript	XR_002627877.1	pseudogene	-1	n.*3599C>G		-1	-1	-1	-1	-1	-1	3599
6	60554810	C	G	PASS	intergenic_region	MODIFIER	LOC102152083-LOC106558973	102152083-106558973	intergenic_region	102152083-106558973		-1	n.60554810C>G		-1	-1	-1	-1	-1	-1	0
6	60559486	TA	T	PASS	intergenic_region	MODIFIER	LOC102152083-LOC106558973	102152083-106558973	intergenic_region	102152083-106558973		-1	n.60559487delA		-1	-1	-1	-1	-1	-1	0
6	60560540	C	T	PASS	intergenic_region	MODIFIER	LOC102152083-LOC106558973	102152083-106558973	intergenic_region	102152083-106558973		-1	n.60560540C>T		-1	-1	-1	-1	-1	-1	0
6	60560964	C	G	PASS	intergenic_region	MODIFIER	LOC102152083-LOC106558973	102152083-106558973	intergenic_region	102152083-106558973		-1	n.60560964C>G		-1	-1	-1	-1	-1	-1	0
6	60564320	C	A	PASS	intergenic_region	MODIFIER	LOC102152083-LOC106558973	102152083-106558973	intergenic_region	102152083-106558973		-1	n.60564320C>A		-1	-1	-1	-1	-1	-1	0
6	60564321	A	T	PASS	intergenic_region	MODIFIER	LOC102152083-LOC106558973	102152083-106558973	intergenic_region	102152083-106558973		-1	n.60564321A>T		-1	-1	-1	-1	-1	-1	0
6	60564564	G	A	PASS	intergenic_region	MODIFIER	LOC102152083-LOC106558973	102152083-106558973	intergenic_region	102152083-106558973		-1	n.60564564G>A		-1	-1	-1	-1	-1	-1	0
6	60565486	GT	G	PASS	intergenic_region	MODIFIER	LOC102152083-LOC106558973	102152083-106558973	intergenic_region	102152083-106558973		-1	n.60565487delT		-1	-1	-1	-1	-1	-1	0
6	60565593	G	T	PASS	intergenic_region	MODIFIER	LOC102152083-LOC106558973	102152083-106558973	intergenic_region	102152083-106558973		-1	n.60565593G>T		-1	-1	-1	-1	-1	-1	0
6	60565630	C	T	PASS	intergenic_region	MODIFIER	LOC102152083-LOC106558973	102152083-106558973	intergenic_region	102152083-106558973		-1	n.60565630C>T		-1	-1	-1	-1	-1	-1	0
6	60565856	G	A	PASS	intergenic_region	MODIFIER	LOC102152083-LOC106558973	102152083-106558973	intergenic_region	102152083-106558973		-1	n.60565856G>A		-1	-1	-1	-1	-1	-1	0
6	60565901	T	A	PASS	intergenic_region	MODIFIER	LOC102152083-LOC106558973	102152083-106558973	intergenic_region	102152083-106558973		-1	n.60565901T>A		-1	-1	-1	-1	-1	-1	0
6	60566092	A	T	PASS	intergenic_region	MODIFIER	LOC102152083-LOC106558973	102152083-106558973	intergenic_region	102152083-106558973		-1	n.60566092A>T		-1	-1	-1	-1	-1	-1	0
6	60566431	T	A	PASS	intergenic_region	MODIFIER	LOC102152083-LOC106558973	102152083-106558973	intergenic_region	102152083-106558973		-1	n.60566431T>A		-1	-1	-1	-1	-1	-1	0
6	60566650	G	C	PASS	intergenic_region	MODIFIER	LOC102152083-LOC106558973	102152083-106558973	intergenic_region	102152083-106558973		-1	n.60566650G>C		-1	-1	-1	-1	-1	-1	0
6	60566748	TATATATATATATC	T	PASS	intergenic_region	MODIFIER	LOC102152083-LOC106558973	102152083-106558973	intergenic_region	102152083-106558973		-1	n.60566749_60566761delATATATATATATC		-1	-1	-1	-1	-1	-1	0
6	60567167	T	C	PASS	intergenic_region	MODIFIER	LOC102152083-LOC106558973	102152083-106558973	intergenic_region	102152083-106558973		-1	n.60567167T>C		-1	-1	-1	-1	-1	-1	0
6	60567382	G	T	PASS	intergenic_region	MODIFIER	LOC102152083-LOC106558973	102152083-106558973	intergenic_region	102152083-106558973		-1	n.60567382G>T		-1	-1	-1	-1	-1	-1	0
6	60567809	C	G	PASS	intergenic_region	MODIFIER	LOC102152083-LOC106558973	102152083-106558973	intergenic_region	102152083-106558973		-1	n.60567809C>G		-1	-1	-1	-1	-1	-1	0
6	60568255	G	T	PASS	intergenic_region	MODIFIER	LOC102152083-LOC106558973	102152083-106558973	intergenic_region	102152083-106558973		-1	n.60568255G>T		-1	-1	-1	-1	-1	-1	0
6	60568330	C	T	PASS	intergenic_region	MODIFIER	LOC102152083-LOC106558973	102152083-106558973	intergenic_region	102152083-106558973		-1	n.60568330C>T		-1	-1	-1	-1	-1	-1	0
6	60568478	T	G	PASS	intergenic_region	MODIFIER	LOC102152083-LOC106558973	102152083-106558973	intergenic_region	102152083-106558973		-1	n.60568478T>G		-1	-1	-1	-1	-1	-1	0
6	60579149	G	A	PASS	intergenic_region	MODIFIER	LOC102152083-LOC106558973	102152083-106558973	intergenic_region	102152083-106558973		-1	n.60579149G>A		-1	-1	-1	-1	-1	-1	0
6	60764771	C	T	PASS	intergenic_region	MODIFIER	LOC106558973-LMO4	106558973-479962	intergenic_region	106558973-479962		-1	n.60764771C>T		-1	-1	-1	-1	-1	-1	0
6	60795926	AGAGT	A	PASS	intergenic_region	MODIFIER	LOC106558973-LMO4	106558973-479962	intergenic_region	106558973-479962		-1	n.60795927_60795930delGAGT		-1	-1	-1	-1	-1	-1	0
6	61261527	A	AG	PASS	intron_variant	MODIFIER	HS2ST1	479963	transcript	XM_005621962.3	protein_coding	1	c.124+36954_124+36955insC		-1	-1	-1	-1	-1	-1	0
6	61261527	A	AG	PASS	intron_variant	MODIFIER	HS2ST1	479963	transcript	XM_537087.6	protein_coding	1	c.124+36954_124+36955insC		-1	-1	-1	-1	-1	-1	0
6	61396109	T	TGTTTTTG	PASS	intergenic_region	MODIFIER	LOC100688578-LOC111096416	100688578-111096416	intergenic_region	100688578-111096416		-1	n.61396109_61396110insGTTTTTG		-1	-1	-1	-1	-1	-1	0
6	61440868	T	C	PASS	intron_variant	MODIFIER	SH3GLB1	612505	transcript	XM_005621963.3	protein_coding	9	c.696-380A>G		-1	-1	-1	-1	-1	-1	0
6	61440868	T	C	PASS	intron_variant	MODIFIER	SH3GLB1	612505	transcript	XM_014114853.2	protein_coding	9	c.696-380A>G		-1	-1	-1	-1	-1	-1	0
6	61440868	T	C	PASS	intron_variant	MODIFIER	SH3GLB1	612505	transcript	XM_850232.5	protein_coding	7	c.585-380A>G		-1	-1	-1	-1	-1	-1	0
6	61440868	T	C	PASS	intron_variant	MODIFIER	SH3GLB1	612505	transcript	XM_005621965.3	protein_coding	9	c.648-380A>G		-1	-1	-1	-1	-1	-1	0
6	61440868	T	C	PASS	intron_variant	MODIFIER	SH3GLB1	612505	transcript	XM_022420534.1	protein_coding	8	c.672-380A>G		-1	-1	-1	-1	-1	-1	0
6	61840141	C	T	PASS	intergenic_region	MODIFIER	ODF2L-LOC100688788	490179-100688788	intergenic_region	490179-100688788		-1	n.61840141C>T		-1	-1	-1	-1	-1	-1	0
6	65786104	CCT	C	PASS	upstream_gene_variant	MODIFIER	ADGRL2	490193	transcript	XM_022419502.1	protein_coding	-1	c.-35527_-35526delAG		-1	-1	-1	-1	-1	-1	853
6	65786104	CCT	C	PASS	intron_variant	MODIFIER	ADGRL2	490193	transcript	XM_022419501.1	protein_coding	1	c.-101+34892_-101+34893delAG		-1	-1	-1	-1	-1	-1	0
6	65786104	CCT	C	PASS	intron_variant	MODIFIER	ADGRL2	490193	transcript	NM_001190488.1	protein_coding	2	c.-93-35434_-93-35433delAG		-1	-1	-1	-1	-1	-1	0
6	65786104	CCT	C	PASS	intron_variant	MODIFIER	ADGRL2	490193	transcript	XM_022419504.1	protein_coding	1	c.-101+34892_-101+34893delAG		-1	-1	-1	-1	-1	-1	0
6	65786104	CCT	C	PASS	intron_variant	MODIFIER	ADGRL2	490193	transcript	XM_022419505.1	protein_coding	1	c.-101+34892_-101+34893delAG		-1	-1	-1	-1	-1	-1	0
6	65786104	CCT	C	PASS	intron_variant	MODIFIER	ADGRL2	490193	transcript	XM_022419507.1	protein_coding	1	c.-101+34892_-101+34893delAG		-1	-1	-1	-1	-1	-1	0
6	65786104	CCT	C	PASS	intron_variant	MODIFIER	ADGRL2	490193	transcript	XM_022419503.1	protein_coding	1	c.-101+34892_-101+34893delAG		-1	-1	-1	-1	-1	-1	0
6	65786104	CCT	C	PASS	intron_variant	MODIFIER	ADGRL2	490193	transcript	XM_022419511.1	protein_coding	1	c.-101+34892_-101+34893delAG		-1	-1	-1	-1	-1	-1	0
6	65786104	CCT	C	PASS	intron_variant	MODIFIER	ADGRL2	490193	transcript	XM_022419510.1	protein_coding	1	c.-101+34892_-101+34893delAG		-1	-1	-1	-1	-1	-1	0
6	65786104	CCT	C	PASS	intron_variant	MODIFIER	ADGRL2	490193	transcript	XM_022419512.1	protein_coding	1	c.-101+34892_-101+34893delAG		-1	-1	-1	-1	-1	-1	0
6	65786104	CCT	C	PASS	intron_variant	MODIFIER	ADGRL2	490193	transcript	XM_022419513.1	protein_coding	1	c.-101+34892_-101+34893delAG		-1	-1	-1	-1	-1	-1	0
6	65786121	C	A	PASS	upstream_gene_variant	MODIFIER	ADGRL2	490193	transcript	XM_022419502.1	protein_coding	-1	c.-35542G>T		-1	-1	-1	-1	-1	-1	869
6	65786121	C	A	PASS	intron_variant	MODIFIER	ADGRL2	490193	transcript	XM_022419501.1	protein_coding	1	c.-101+34877G>T		-1	-1	-1	-1	-1	-1	0
6	65786121	C	A	PASS	intron_variant	MODIFIER	ADGRL2	490193	transcript	NM_001190488.1	protein_coding	2	c.-93-35449G>T		-1	-1	-1	-1	-1	-1	0
6	65786121	C	A	PASS	intron_variant	MODIFIER	ADGRL2	490193	transcript	XM_022419504.1	protein_coding	1	c.-101+34877G>T		-1	-1	-1	-1	-1	-1	0
6	65786121	C	A	PASS	intron_variant	MODIFIER	ADGRL2	490193	transcript	XM_022419505.1	protein_coding	1	c.-101+34877G>T		-1	-1	-1	-1	-1	-1	0
6	65786121	C	A	PASS	intron_variant	MODIFIER	ADGRL2	490193	transcript	XM_022419507.1	protein_coding	1	c.-101+34877G>T		-1	-1	-1	-1	-1	-1	0
6	65786121	C	A	PASS	intron_variant	MODIFIER	ADGRL2	490193	transcript	XM_022419503.1	protein_coding	1	c.-101+34877G>T		-1	-1	-1	-1	-1	-1	0
6	65786121	C	A	PASS	intron_variant	MODIFIER	ADGRL2	490193	transcript	XM_022419511.1	protein_coding	1	c.-101+34877G>T		-1	-1	-1	-1	-1	-1	0
6	65786121	C	A	PASS	intron_variant	MODIFIER	ADGRL2	490193	transcript	XM_022419510.1	protein_coding	1	c.-101+34877G>T		-1	-1	-1	-1	-1	-1	0
6	65786121	C	A	PASS	intron_variant	MODIFIER	ADGRL2	490193	transcript	XM_022419512.1	protein_coding	1	c.-101+34877G>T		-1	-1	-1	-1	-1	-1	0
6	65786121	C	A	PASS	intron_variant	MODIFIER	ADGRL2	490193	transcript	XM_022419513.1	protein_coding	1	c.-101+34877G>T		-1	-1	-1	-1	-1	-1	0
6	73807288	C	T	PASS	intergenic_region	MODIFIER	LOC111096453-NEGR1	111096453-612706	intergenic_region	111096453-612706		-1	n.73807288C>T		-1	-1	-1	-1	-1	-1	0
6	73807427	T	C	PASS	intergenic_region	MODIFIER	LOC111096453-NEGR1	111096453-612706	intergenic_region	111096453-612706		-1	n.73807427T>C		-1	-1	-1	-1	-1	-1	0
6	73807733	C	T	PASS	intergenic_region	MODIFIER	LOC111096453-NEGR1	111096453-612706	intergenic_region	111096453-612706		-1	n.73807733C>T		-1	-1	-1	-1	-1	-1	0
6	73814202	TCAATTTAATGAAAATGATTCA	T	PASS	intergenic_region	MODIFIER	LOC111096453-NEGR1	111096453-612706	intergenic_region	111096453-612706		-1	n.73814203_73814223delCAATTTAATGAAAATGATTCA		-1	-1	-1	-1	-1	-1	0
6	73814225	GGGTGGAAAATAAGCACATGAGAAGATATCCAACATTATTCAATTTAAAAAAAATAAATAAATCTTTATTTTTTTTTAAATGGGCAAATGACATGAGATTTACACGGAAAATGATTCAAGGGTGGAAAATAAGCACATGAGAAGATATCCAACA	G	PASS	intergenic_region	MODIFIER	LOC111096453-NEGR1	111096453-612706	intergenic_region	111096453-612706		-1	n.73814226_73814378del		-1	-1	-1	-1	-1	-1	0
6	77323452	A	AGATGGATG	PASS	upstream_gene_variant	MODIFIER	GNG12	100686332	transcript	XM_022420644.1	protein_coding	-1	c.-49156_-49155insGATGGATG		-1	-1	-1	-1	-1	-1	2127
6	77323452	A	AGATGGATG	PASS	intron_variant	MODIFIER	GNG12	100686332	transcript	XM_022420643.1	protein_coding	1	c.77+6712_77+6713insGATGGATG		-1	-1	-1	-1	-1	-1	0
7	737406	GA	G	PASS	intron_variant	MODIFIER	LGR6	490231	transcript	XM_843782.3	protein_coding	18	c.1885+911delT		-1	-1	-1	-1	-1	-1	0
7	737406	GA	G	PASS	intron_variant	MODIFIER	LGR6	490231	transcript	XM_005622187.3	protein_coding	16	c.1399+911delT		-1	-1	-1	-1	-1	-1	0
7	737406	GA	G	PASS	intron_variant	MODIFIER	LGR6	490231	transcript	XM_005622185.2	protein_coding	17	c.1813+911delT		-1	-1	-1	-1	-1	-1	0
7	737416	T	G	PASS	intron_variant	MODIFIER	LGR6	490231	transcript	XM_843782.3	protein_coding	18	c.1885+902A>C		-1	-1	-1	-1	-1	-1	0
7	737416	T	G	PASS	intron_variant	MODIFIER	LGR6	490231	transcript	XM_005622187.3	protein_coding	16	c.1399+902A>C		-1	-1	-1	-1	-1	-1	0
7	737416	T	G	PASS	intron_variant	MODIFIER	LGR6	490231	transcript	XM_005622185.2	protein_coding	17	c.1813+902A>C		-1	-1	-1	-1	-1	-1	0
7	737419	A	G	PASS	intron_variant	MODIFIER	LGR6	490231	transcript	XM_843782.3	protein_coding	18	c.1885+899T>C		-1	-1	-1	-1	-1	-1	0
7	737419	A	G	PASS	intron_variant	MODIFIER	LGR6	490231	transcript	XM_005622187.3	protein_coding	16	c.1399+899T>C		-1	-1	-1	-1	-1	-1	0
7	737419	A	G	PASS	intron_variant	MODIFIER	LGR6	490231	transcript	XM_005622185.2	protein_coding	17	c.1813+899T>C		-1	-1	-1	-1	-1	-1	0
7	1243688	T	A	PASS	intron_variant	MODIFIER	NAV1	490238	transcript	XM_843488.5	protein_coding	3	c.1631-8850A>T		-1	-1	-1	-1	-1	-1	0
7	1243688	T	A	PASS	intron_variant	MODIFIER	NAV1	490238	transcript	XM_005622195.3	protein_coding	3	c.1631-8850A>T		-1	-1	-1	-1	-1	-1	0
7	1243688	T	A	PASS	intron_variant	MODIFIER	NAV1	490238	transcript	XM_005622196.3	protein_coding	3	c.1631-8850A>T		-1	-1	-1	-1	-1	-1	0
7	1243688	T	A	PASS	intron_variant	MODIFIER	NAV1	490238	transcript	XM_005622197.3	protein_coding	3	c.1631-8850A>T		-1	-1	-1	-1	-1	-1	0
7	1243688	T	A	PASS	intron_variant	MODIFIER	NAV1	490238	transcript	XM_005622198.3	protein_coding	3	c.1631-8850A>T		-1	-1	-1	-1	-1	-1	0
7	1243688	T	A	PASS	intron_variant	MODIFIER	NAV1	490238	transcript	XM_022420808.1	protein_coding	2	c.827-8850A>T		-1	-1	-1	-1	-1	-1	0
7	1616389	C	T	PASS	upstream_gene_variant	MODIFIER	TNNT2	403532	transcript	NM_001003012.2	protein_coding	-1	c.-3186G>A		-1	-1	-1	-1	-1	-1	3176
7	1616389	C	T	PASS	intron_variant	MODIFIER	TNNT2	403532	transcript	XM_005622136.3	protein_coding	1	c.-10-3176G>A		-1	-1	-1	-1	-1	-1	0
7	1616389	C	T	PASS	intron_variant	MODIFIER	TNNT2	403532	transcript	XM_005622137.3	protein_coding	1	c.-14-3172G>A		-1	-1	-1	-1	-1	-1	0
7	1616389	C	T	PASS	intron_variant	MODIFIER	TNNT2	403532	transcript	XM_005622140.3	protein_coding	1	c.-14-3172G>A		-1	-1	-1	-1	-1	-1	0
7	1616389	C	T	PASS	intron_variant	MODIFIER	TNNT2	403532	transcript	XM_005622141.3	protein_coding	1	c.-14-3172G>A		-1	-1	-1	-1	-1	-1	0
7	1616389	C	T	PASS	intron_variant	MODIFIER	TNNT2	403532	transcript	XM_005622144.3	protein_coding	1	c.-14-3172G>A		-1	-1	-1	-1	-1	-1	0
7	1616389	C	T	PASS	intron_variant	MODIFIER	TNNT2	403532	transcript	XM_005622146.3	protein_coding	1	c.-14-3172G>A		-1	-1	-1	-1	-1	-1	0
7	1616389	C	T	PASS	intron_variant	MODIFIER	TNNT2	403532	transcript	XM_014114911.2	protein_coding	1	c.-14-3172G>A		-1	-1	-1	-1	-1	-1	0
7	1616389	C	T	PASS	intron_variant	MODIFIER	TNNT2	403532	transcript	XM_014114917.2	protein_coding	1	c.-10-3176G>A		-1	-1	-1	-1	-1	-1	0
7	1616389	C	T	PASS	intron_variant	MODIFIER	TNNT2	403532	transcript	XM_005622138.3	protein_coding	1	c.-10-3176G>A		-1	-1	-1	-1	-1	-1	0
7	1616389	C	T	PASS	intron_variant	MODIFIER	TNNT2	403532	transcript	XM_005622145.3	protein_coding	1	c.-14-3172G>A		-1	-1	-1	-1	-1	-1	0
7	1616389	C	T	PASS	intron_variant	MODIFIER	TNNT2	403532	transcript	XM_014114913.2	protein_coding	1	c.-14-3172G>A		-1	-1	-1	-1	-1	-1	0
7	1616389	C	T	PASS	intron_variant	MODIFIER	TNNT2	403532	transcript	XM_014114914.2	protein_coding	1	c.-14-3172G>A		-1	-1	-1	-1	-1	-1	0
7	1616389	C	T	PASS	intron_variant	MODIFIER	TNNT2	403532	transcript	XM_014114915.2	protein_coding	1	c.-10-3176G>A		-1	-1	-1	-1	-1	-1	0
7	1616389	C	T	PASS	intron_variant	MODIFIER	TNNT2	403532	transcript	XM_014114916.2	protein_coding	1	c.-10-3176G>A		-1	-1	-1	-1	-1	-1	0
7	1616389	C	T	PASS	intron_variant	MODIFIER	TNNT2	403532	transcript	XM_014114921.2	protein_coding	1	c.-10-3176G>A		-1	-1	-1	-1	-1	-1	0
7	1616389	C	T	PASS	intron_variant	MODIFIER	TNNT2	403532	transcript	XM_022420716.1	protein_coding	2	c.-10-3176G>A		-1	-1	-1	-1	-1	-1	0
7	1616389	C	T	PASS	intron_variant	MODIFIER	TNNT2	403532	transcript	XM_022420718.1	protein_coding	2	c.-10-3176G>A		-1	-1	-1	-1	-1	-1	0
7	1616389	C	T	PASS	intron_variant	MODIFIER	TNNT2	403532	transcript	XM_022420720.1	protein_coding	2	c.-10-3176G>A		-1	-1	-1	-1	-1	-1	0
7	1616389	C	T	PASS	intron_variant	MODIFIER	TNNT2	403532	transcript	XM_022420721.1	protein_coding	2	c.-10-3176G>A		-1	-1	-1	-1	-1	-1	0
7	1616389	C	T	PASS	intron_variant	MODIFIER	TNNT2	403532	transcript	XM_022420724.1	protein_coding	2	c.-10-3176G>A		-1	-1	-1	-1	-1	-1	0
7	1616389	C	T	PASS	intron_variant	MODIFIER	TNNT2	403532	transcript	XM_005622139.3	protein_coding	1	c.-10-3176G>A		-1	-1	-1	-1	-1	-1	0
7	1616389	C	T	PASS	intron_variant	MODIFIER	TNNT2	403532	transcript	XM_005622151.3	protein_coding	1	c.-14-3172G>A		-1	-1	-1	-1	-1	-1	0
7	1616389	C	T	PASS	intron_variant	MODIFIER	TNNT2	403532	transcript	XM_005622152.3	protein_coding	1	c.-14-3172G>A		-1	-1	-1	-1	-1	-1	0
7	1616389	C	T	PASS	intron_variant	MODIFIER	TNNT2	403532	transcript	XM_022420717.1	protein_coding	2	c.-14-3172G>A		-1	-1	-1	-1	-1	-1	0
7	1616389	C	T	PASS	intron_variant	MODIFIER	TNNT2	403532	transcript	XM_005622143.3	protein_coding	1	c.-10-3176G>A		-1	-1	-1	-1	-1	-1	0
7	1616389	C	T	PASS	intron_variant	MODIFIER	TNNT2	403532	transcript	XM_005622147.3	protein_coding	1	c.-14-3172G>A		-1	-1	-1	-1	-1	-1	0
7	1616389	C	T	PASS	intron_variant	MODIFIER	TNNT2	403532	transcript	XM_005622149.3	protein_coding	1	c.-14-3172G>A		-1	-1	-1	-1	-1	-1	0
7	1616389	C	T	PASS	intron_variant	MODIFIER	TNNT2	403532	transcript	XM_014114918.2	protein_coding	1	c.-14-3172G>A		-1	-1	-1	-1	-1	-1	0
7	1616389	C	T	PASS	intron_variant	MODIFIER	TNNT2	403532	transcript	XM_022420723.1	protein_coding	1	c.-14-3172G>A		-1	-1	-1	-1	-1	-1	0
7	1616389	C	T	PASS	intron_variant	MODIFIER	TNNT2	403532	transcript	XM_022420722.1	protein_coding	2	c.-10-3176G>A		-1	-1	-1	-1	-1	-1	0
7	1616427	CCAT	C	PASS	upstream_gene_variant	MODIFIER	TNNT2	403532	transcript	NM_001003012.2	protein_coding	-1	c.-3227_-3225delATG		-1	-1	-1	-1	-1	-1	3215
7	1616427	CCAT	C	PASS	intron_variant	MODIFIER	TNNT2	403532	transcript	XM_005622136.3	protein_coding	1	c.-10-3217_-10-3215delATG		-1	-1	-1	-1	-1	-1	0
7	1616427	CCAT	C	PASS	intron_variant	MODIFIER	TNNT2	403532	transcript	XM_005622137.3	protein_coding	1	c.-14-3213_-14-3211delATG		-1	-1	-1	-1	-1	-1	0
7	1616427	CCAT	C	PASS	intron_variant	MODIFIER	TNNT2	403532	transcript	XM_005622140.3	protein_coding	1	c.-14-3213_-14-3211delATG		-1	-1	-1	-1	-1	-1	0
7	1616427	CCAT	C	PASS	intron_variant	MODIFIER	TNNT2	403532	transcript	XM_005622141.3	protein_coding	1	c.-14-3213_-14-3211delATG		-1	-1	-1	-1	-1	-1	0
7	1616427	CCAT	C	PASS	intron_variant	MODIFIER	TNNT2	403532	transcript	XM_005622144.3	protein_coding	1	c.-14-3213_-14-3211delATG		-1	-1	-1	-1	-1	-1	0
7	1616427	CCAT	C	PASS	intron_variant	MODIFIER	TNNT2	403532	transcript	XM_005622146.3	protein_coding	1	c.-14-3213_-14-3211delATG		-1	-1	-1	-1	-1	-1	0
7	1616427	CCAT	C	PASS	intron_variant	MODIFIER	TNNT2	403532	transcript	XM_014114911.2	protein_coding	1	c.-14-3213_-14-3211delATG		-1	-1	-1	-1	-1	-1	0
7	1616427	CCAT	C	PASS	intron_variant	MODIFIER	TNNT2	403532	transcript	XM_014114917.2	protein_coding	1	c.-10-3217_-10-3215delATG		-1	-1	-1	-1	-1	-1	0
7	1616427	CCAT	C	PASS	intron_variant	MODIFIER	TNNT2	403532	transcript	XM_005622138.3	protein_coding	1	c.-10-3217_-10-3215delATG		-1	-1	-1	-1	-1	-1	0
7	1616427	CCAT	C	PASS	intron_variant	MODIFIER	TNNT2	403532	transcript	XM_005622145.3	protein_coding	1	c.-14-3213_-14-3211delATG		-1	-1	-1	-1	-1	-1	0
7	1616427	CCAT	C	PASS	intron_variant	MODIFIER	TNNT2	403532	transcript	XM_014114913.2	protein_coding	1	c.-14-3213_-14-3211delATG		-1	-1	-1	-1	-1	-1	0
7	1616427	CCAT	C	PASS	intron_variant	MODIFIER	TNNT2	403532	transcript	XM_014114914.2	protein_coding	1	c.-14-3213_-14-3211delATG		-1	-1	-1	-1	-1	-1	0
7	1616427	CCAT	C	PASS	intron_variant	MODIFIER	TNNT2	403532	transcript	XM_014114915.2	protein_coding	1	c.-10-3217_-10-3215delATG		-1	-1	-1	-1	-1	-1	0
7	1616427	CCAT	C	PASS	intron_variant	MODIFIER	TNNT2	403532	transcript	XM_014114916.2	protein_coding	1	c.-10-3217_-10-3215delATG		-1	-1	-1	-1	-1	-1	0
7	1616427	CCAT	C	PASS	intron_variant	MODIFIER	TNNT2	403532	transcript	XM_014114921.2	protein_coding	1	c.-10-3217_-10-3215delATG		-1	-1	-1	-1	-1	-1	0
7	1616427	CCAT	C	PASS	intron_variant	MODIFIER	TNNT2	403532	transcript	XM_022420716.1	protein_coding	2	c.-10-3217_-10-3215delATG		-1	-1	-1	-1	-1	-1	0
7	1616427	CCAT	C	PASS	intron_variant	MODIFIER	TNNT2	403532	transcript	XM_022420718.1	protein_coding	2	c.-10-3217_-10-3215delATG		-1	-1	-1	-1	-1	-1	0
7	1616427	CCAT	C	PASS	intron_variant	MODIFIER	TNNT2	403532	transcript	XM_022420720.1	protein_coding	2	c.-10-3217_-10-3215delATG		-1	-1	-1	-1	-1	-1	0
7	1616427	CCAT	C	PASS	intron_variant	MODIFIER	TNNT2	403532	transcript	XM_022420721.1	protein_coding	2	c.-10-3217_-10-3215delATG		-1	-1	-1	-1	-1	-1	0
7	1616427	CCAT	C	PASS	intron_variant	MODIFIER	TNNT2	403532	transcript	XM_022420724.1	protein_coding	2	c.-10-3217_-10-3215delATG		-1	-1	-1	-1	-1	-1	0
7	1616427	CCAT	C	PASS	intron_variant	MODIFIER	TNNT2	403532	transcript	XM_005622139.3	protein_coding	1	c.-10-3217_-10-3215delATG		-1	-1	-1	-1	-1	-1	0
7	1616427	CCAT	C	PASS	intron_variant	MODIFIER	TNNT2	403532	transcript	XM_005622151.3	protein_coding	1	c.-14-3213_-14-3211delATG		-1	-1	-1	-1	-1	-1	0
7	1616427	CCAT	C	PASS	intron_variant	MODIFIER	TNNT2	403532	transcript	XM_005622152.3	protein_coding	1	c.-14-3213_-14-3211delATG		-1	-1	-1	-1	-1	-1	0
7	1616427	CCAT	C	PASS	intron_variant	MODIFIER	TNNT2	403532	transcript	XM_022420717.1	protein_coding	2	c.-14-3213_-14-3211delATG		-1	-1	-1	-1	-1	-1	0
7	1616427	CCAT	C	PASS	intron_variant	MODIFIER	TNNT2	403532	transcript	XM_005622143.3	protein_coding	1	c.-10-3217_-10-3215delATG		-1	-1	-1	-1	-1	-1	0
7	1616427	CCAT	C	PASS	intron_variant	MODIFIER	TNNT2	403532	transcript	XM_005622147.3	protein_coding	1	c.-14-3213_-14-3211delATG		-1	-1	-1	-1	-1	-1	0
7	1616427	CCAT	C	PASS	intron_variant	MODIFIER	TNNT2	403532	transcript	XM_005622149.3	protein_coding	1	c.-14-3213_-14-3211delATG		-1	-1	-1	-1	-1	-1	0
7	1616427	CCAT	C	PASS	intron_variant	MODIFIER	TNNT2	403532	transcript	XM_014114918.2	protein_coding	1	c.-14-3213_-14-3211delATG		-1	-1	-1	-1	-1	-1	0
7	1616427	CCAT	C	PASS	intron_variant	MODIFIER	TNNT2	403532	transcript	XM_022420723.1	protein_coding	1	c.-14-3213_-14-3211delATG		-1	-1	-1	-1	-1	-1	0
7	1616427	CCAT	C	PASS	intron_variant	MODIFIER	TNNT2	403532	transcript	XM_022420722.1	protein_coding	2	c.-10-3217_-10-3215delATG		-1	-1	-1	-1	-1	-1	0
7	1616438	ACCAC	A	PASS	upstream_gene_variant	MODIFIER	TNNT2	403532	transcript	NM_001003012.2	protein_coding	-1	c.-3239_-3236delGTGG		-1	-1	-1	-1	-1	-1	3226
7	1616438	ACCAC	A	PASS	intron_variant	MODIFIER	TNNT2	403532	transcript	XM_005622136.3	protein_coding	1	c.-10-3229_-10-3226delGTGG		-1	-1	-1	-1	-1	-1	0
7	1616438	ACCAC	A	PASS	intron_variant	MODIFIER	TNNT2	403532	transcript	XM_005622137.3	protein_coding	1	c.-14-3225_-14-3222delGTGG		-1	-1	-1	-1	-1	-1	0
7	1616438	ACCAC	A	PASS	intron_variant	MODIFIER	TNNT2	403532	transcript	XM_005622140.3	protein_coding	1	c.-14-3225_-14-3222delGTGG		-1	-1	-1	-1	-1	-1	0
7	1616438	ACCAC	A	PASS	intron_variant	MODIFIER	TNNT2	403532	transcript	XM_005622141.3	protein_coding	1	c.-14-3225_-14-3222delGTGG		-1	-1	-1	-1	-1	-1	0
7	1616438	ACCAC	A	PASS	intron_variant	MODIFIER	TNNT2	403532	transcript	XM_005622144.3	protein_coding	1	c.-14-3225_-14-3222delGTGG		-1	-1	-1	-1	-1	-1	0
7	1616438	ACCAC	A	PASS	intron_variant	MODIFIER	TNNT2	403532	transcript	XM_005622146.3	protein_coding	1	c.-14-3225_-14-3222delGTGG		-1	-1	-1	-1	-1	-1	0
7	1616438	ACCAC	A	PASS	intron_variant	MODIFIER	TNNT2	403532	transcript	XM_014114911.2	protein_coding	1	c.-14-3225_-14-3222delGTGG		-1	-1	-1	-1	-1	-1	0
7	1616438	ACCAC	A	PASS	intron_variant	MODIFIER	TNNT2	403532	transcript	XM_014114917.2	protein_coding	1	c.-10-3229_-10-3226delGTGG		-1	-1	-1	-1	-1	-1	0
7	1616438	ACCAC	A	PASS	intron_variant	MODIFIER	TNNT2	403532	transcript	XM_005622138.3	protein_coding	1	c.-10-3229_-10-3226delGTGG		-1	-1	-1	-1	-1	-1	0
7	1616438	ACCAC	A	PASS	intron_variant	MODIFIER	TNNT2	403532	transcript	XM_005622145.3	protein_coding	1	c.-14-3225_-14-3222delGTGG		-1	-1	-1	-1	-1	-1	0
7	1616438	ACCAC	A	PASS	intron_variant	MODIFIER	TNNT2	403532	transcript	XM_014114913.2	protein_coding	1	c.-14-3225_-14-3222delGTGG		-1	-1	-1	-1	-1	-1	0
7	1616438	ACCAC	A	PASS	intron_variant	MODIFIER	TNNT2	403532	transcript	XM_014114914.2	protein_coding	1	c.-14-3225_-14-3222delGTGG		-1	-1	-1	-1	-1	-1	0
7	1616438	ACCAC	A	PASS	intron_variant	MODIFIER	TNNT2	403532	transcript	XM_014114915.2	protein_coding	1	c.-10-3229_-10-3226delGTGG		-1	-1	-1	-1	-1	-1	0
7	1616438	ACCAC	A	PASS	intron_variant	MODIFIER	TNNT2	403532	transcript	XM_014114916.2	protein_coding	1	c.-10-3229_-10-3226delGTGG		-1	-1	-1	-1	-1	-1	0
7	1616438	ACCAC	A	PASS	intron_variant	MODIFIER	TNNT2	403532	transcript	XM_014114921.2	protein_coding	1	c.-10-3229_-10-3226delGTGG		-1	-1	-1	-1	-1	-1	0
7	1616438	ACCAC	A	PASS	intron_variant	MODIFIER	TNNT2	403532	transcript	XM_022420716.1	protein_coding	2	c.-10-3229_-10-3226delGTGG		-1	-1	-1	-1	-1	-1	0
7	1616438	ACCAC	A	PASS	intron_variant	MODIFIER	TNNT2	403532	transcript	XM_022420718.1	protein_coding	2	c.-10-3229_-10-3226delGTGG		-1	-1	-1	-1	-1	-1	0
7	1616438	ACCAC	A	PASS	intron_variant	MODIFIER	TNNT2	403532	transcript	XM_022420720.1	protein_coding	2	c.-10-3229_-10-3226delGTGG		-1	-1	-1	-1	-1	-1	0
7	1616438	ACCAC	A	PASS	intron_variant	MODIFIER	TNNT2	403532	transcript	XM_022420721.1	protein_coding	2	c.-10-3229_-10-3226delGTGG		-1	-1	-1	-1	-1	-1	0
7	1616438	ACCAC	A	PASS	intron_variant	MODIFIER	TNNT2	403532	transcript	XM_022420724.1	protein_coding	2	c.-10-3229_-10-3226delGTGG		-1	-1	-1	-1	-1	-1	0
7	1616438	ACCAC	A	PASS	intron_variant	MODIFIER	TNNT2	403532	transcript	XM_005622139.3	protein_coding	1	c.-10-3229_-10-3226delGTGG		-1	-1	-1	-1	-1	-1	0
7	1616438	ACCAC	A	PASS	intron_variant	MODIFIER	TNNT2	403532	transcript	XM_005622151.3	protein_coding	1	c.-14-3225_-14-3222delGTGG		-1	-1	-1	-1	-1	-1	0
7	1616438	ACCAC	A	PASS	intron_variant	MODIFIER	TNNT2	403532	transcript	XM_005622152.3	protein_coding	1	c.-14-3225_-14-3222delGTGG		-1	-1	-1	-1	-1	-1	0
7	1616438	ACCAC	A	PASS	intron_variant	MODIFIER	TNNT2	403532	transcript	XM_022420717.1	protein_coding	2	c.-14-3225_-14-3222delGTGG		-1	-1	-1	-1	-1	-1	0
7	1616438	ACCAC	A	PASS	intron_variant	MODIFIER	TNNT2	403532	transcript	XM_005622143.3	protein_coding	1	c.-10-3229_-10-3226delGTGG		-1	-1	-1	-1	-1	-1	0
7	1616438	ACCAC	A	PASS	intron_variant	MODIFIER	TNNT2	403532	transcript	XM_005622147.3	protein_coding	1	c.-14-3225_-14-3222delGTGG		-1	-1	-1	-1	-1	-1	0
7	1616438	ACCAC	A	PASS	intron_variant	MODIFIER	TNNT2	403532	transcript	XM_005622149.3	protein_coding	1	c.-14-3225_-14-3222delGTGG		-1	-1	-1	-1	-1	-1	0
7	1616438	ACCAC	A	PASS	intron_variant	MODIFIER	TNNT2	403532	transcript	XM_014114918.2	protein_coding	1	c.-14-3225_-14-3222delGTGG		-1	-1	-1	-1	-1	-1	0
7	1616438	ACCAC	A	PASS	intron_variant	MODIFIER	TNNT2	403532	transcript	XM_022420723.1	protein_coding	1	c.-14-3225_-14-3222delGTGG		-1	-1	-1	-1	-1	-1	0
7	1616438	ACCAC	A	PASS	intron_variant	MODIFIER	TNNT2	403532	transcript	XM_022420722.1	protein_coding	2	c.-10-3229_-10-3226delGTGG		-1	-1	-1	-1	-1	-1	0
7	2044350	AGGAAAGAAAGGAAAG	A	PASS	intergenic_region	MODIFIER	LOC100855804-LOC106559010	100855804-106559010	intergenic_region	100855804-106559010		-1	n.2044351_2044365delGGAAAGAAAGGAAAG		-1	-1	-1	-1	-1	-1	0
7	2044400	A	G	PASS	intergenic_region	MODIFIER	LOC100855804-LOC106559010	100855804-106559010	intergenic_region	100855804-106559010		-1	n.2044400A>G		-1	-1	-1	-1	-1	-1	0
7	2766553	A	C	PASS	intergenic_region	MODIFIER	ZNF281-LOC111096854	490250-111096854	intergenic_region	490250-111096854		-1	n.2766553A>C		-1	-1	-1	-1	-1	-1	0
7	13374858	G	A	PASS	intergenic_region	MODIFIER	LOC100684306-LOC490297	100684306-490297	intergenic_region	100684306-490297		-1	n.13374858G>A		-1	-1	-1	-1	-1	-1	0
7	14082257	T	G	PASS	intron_variant	MODIFIER	LOC111096870	111096870	transcript	XR_002628860.1	pseudogene	2	n.157-1194A>C		-1	-1	-1	-1	-1	-1	0
7	16728277	T	A	PASS	intron_variant	MODIFIER	NMNAT2	610576	transcript	XM_014115125.2	protein_coding	3	c.85+52878A>T		-1	-1	-1	-1	-1	-1	0
7	16728277	T	A	PASS	intron_variant	MODIFIER	NMNAT2	610576	transcript	XM_022420964.1	protein_coding	4	c.85+52878A>T		-1	-1	-1	-1	-1	-1	0
7	16728277	T	A	PASS	intron_variant	MODIFIER	NMNAT2	610576	transcript	XM_022420962.1	protein_coding	2	c.85+52878A>T		-1	-1	-1	-1	-1	-1	0
7	16728277	T	A	PASS	intron_variant	MODIFIER	NMNAT2	610576	transcript	XM_022420963.1	protein_coding	4	c.85+52878A>T		-1	-1	-1	-1	-1	-1	0
7	16728277	T	A	PASS	intron_variant	MODIFIER	NMNAT2	610576	transcript	XM_022420960.1	protein_coding	4	c.85+52878A>T		-1	-1	-1	-1	-1	-1	0
7	16728277	T	A	PASS	intron_variant	MODIFIER	NMNAT2	610576	transcript	XM_014115126.2	protein_coding	3	c.85+52878A>T		-1	-1	-1	-1	-1	-1	0
7	16728277	T	A	PASS	intron_variant	MODIFIER	NMNAT2	610576	transcript	XM_022420961.1	protein_coding	4	c.85+52878A>T		-1	-1	-1	-1	-1	-1	0
7	17265917	C	T	PASS	intron_variant	MODIFIER	COLGALT2	608413	transcript	XM_022421703.1	protein_coding	6	c.952+2083G>A		-1	-1	-1	-1	-1	-1	0
7	17265971	A	AATAAAT	PASS	intron_variant	MODIFIER	COLGALT2	608413	transcript	XM_022421703.1	protein_coding	6	c.952+2028_952+2029insATTTAT		-1	-1	-1	-1	-1	-1	0
7	19330081	T	A	PASS	intergenic_region	MODIFIER	HMCN1-PRG4	490318-664716	intergenic_region	490318-664716		-1	n.19330081T>A		-1	-1	-1	-1	-1	-1	0
7	22977385	G	GAGCAGCT	PASS	intron_variant	MODIFIER	PAPPA2	480058	transcript	XM_537179.6	protein_coding	3	c.1964+25146_1964+25147insAGCTGCT		-1	-1	-1	-1	-1	-1	0
7	22977385	G	GAGCAGCT	PASS	intron_variant	MODIFIER	PAPPA2	480058	transcript	XR_002628288.1	pseudogene	3	n.3129+25146_3129+25147insAGCTGCT		-1	-1	-1	-1	-1	-1	0
7	23361978	C	CTCTG	PASS	upstream_gene_variant	MODIFIER	LOC102151295	102151295	transcript	102151295	pseudogene	-1	n.-3271_-3270insCAGA		-1	-1	-1	-1	-1	-1	3271
7	23361978	C	CTCTG	PASS	intron_variant	MODIFIER	RFWD2	480060	transcript	XM_014115172.2	protein_coding	3	c.572-460_572-459insTCTG		-1	-1	-1	-1	-1	-1	0
7	23361978	C	CTCTG	PASS	intron_variant	MODIFIER	RFWD2	480060	transcript	XM_022421016.1	protein_coding	3	c.572-460_572-459insTCTG		-1	-1	-1	-1	-1	-1	0
7	23361978	C	CTCTG	PASS	intron_variant	MODIFIER	RFWD2	480060	transcript	XM_014115171.2	protein_coding	3	c.572-460_572-459insTCTG		-1	-1	-1	-1	-1	-1	0
7	23361978	C	CTCTG	PASS	intron_variant	MODIFIER	RFWD2	480060	transcript	XM_022421014.1	protein_coding	3	c.572-460_572-459insTCTG		-1	-1	-1	-1	-1	-1	0
7	23361978	C	CTCTG	PASS	intron_variant	MODIFIER	RFWD2	480060	transcript	XM_022421015.1	protein_coding	3	c.572-460_572-459insTCTG		-1	-1	-1	-1	-1	-1	0
7	23361978	C	CTCTG	PASS	intron_variant	MODIFIER	RFWD2	480060	transcript	XM_537181.6	protein_coding	3	c.572-460_572-459insTCTG		-1	-1	-1	-1	-1	-1	0
7	23361978	C	CTCTG	PASS	intron_variant	MODIFIER	RFWD2	480060	transcript	XM_014115170.2	protein_coding	3	c.143-460_143-459insTCTG		-1	-1	-1	-1	-1	-1	0
7	32839849	G	C	PASS	intergenic_region	MODIFIER	RGS7-LOC111096682	100687600-111096682	intergenic_region	100687600-111096682		-1	n.32839849G>C		-1	-1	-1	-1	-1	-1	0
7	38184862	G	A	PASS	intergenic_region	MODIFIER	PSEN2-LOC111096893	490382-111096893	intergenic_region	490382-111096893		-1	n.38184862G>A		-1	-1	-1	-1	-1	-1	0
7	38184865	A	T	PASS	intergenic_region	MODIFIER	PSEN2-LOC111096893	490382-111096893	intergenic_region	490382-111096893		-1	n.38184865A>T		-1	-1	-1	-1	-1	-1	0
7	40896418	T	A	PASS	upstream_gene_variant	MODIFIER	LOC612059	612059	transcript	XM_014115291.2	protein_coding	-1	c.-2020A>T		-1	-1	-1	-1	-1	-1	388
7	40896418	T	A	PASS	intron_variant	MODIFIER	LOC612059	612059	transcript	XM_005622669.3	protein_coding	1	c.-29-233A>T		-1	-1	-1	-1	-1	-1	0
7	40896418	T	A	PASS	intron_variant	MODIFIER	LOC612059	612059	transcript	XM_005622670.3	protein_coding	1	c.-29-233A>T		-1	-1	-1	-1	-1	-1	0
7	40896418	T	A	PASS	intron_variant	MODIFIER	LOC612059	612059	transcript	XM_022421223.1	protein_coding	1	c.-29-233A>T		-1	-1	-1	-1	-1	-1	0
7	40896418	T	A	PASS	intron_variant	MODIFIER	LOC612059	612059	transcript	XM_022421224.1	protein_coding	1	c.-29-233A>T		-1	-1	-1	-1	-1	-1	0
7	43303257	G	GTTTTTGT	PASS	intergenic_region	MODIFIER	GATAD2B-SLC27A3	490453-100855793	intergenic_region	490453-100855793		-1	n.43303257_43303258insTTTTTGT		-1	-1	-1	-1	-1	-1	0
7	45925357	C	A	PASS	intergenic_region	MODIFIER	SLC14A2-LOC111096750	490471-111096750	intergenic_region	490471-111096750		-1	n.45925357C>A		-1	-1	-1	-1	-1	-1	0
7	49205350	TA	T	PASS	intergenic_region	MODIFIER	LOC111096759-LOC111096903	111096759-111096903	intergenic_region	111096759-111096903		-1	n.49205351delA		-1	-1	-1	-1	-1	-1	0
7	51753598	C	CTAACTCTGGGAAACGAACTAGGGGTGG	PASS	intergenic_region	MODIFIER	LOC111096906-LOC111096765	111096906-111096765	intergenic_region	111096906-111096765		-1	n.51753598_51753599insTAACTCTGGGAAACGAACTAGGGGTGG		-1	-1	-1	-1	-1	-1	0
7	52553308	G	T	PASS	intergenic_region	MODIFIER	LOC111096767-LOC111096769	111096767-111096769	intergenic_region	111096767-111096769		-1	n.52553308G>T		-1	-1	-1	-1	-1	-1	0
7	52614633	A	G	PASS	downstream_gene_variant	MODIFIER	LOC111096769	111096769	transcript	XR_002628627.1	pseudogene	-1	n.*3348A>G		-1	-1	-1	-1	-1	-1	3348
7	52614633	A	G	PASS	downstream_gene_variant	MODIFIER	LOC111096769	111096769	transcript	XR_002628628.1	pseudogene	-1	n.*3348A>G		-1	-1	-1	-1	-1	-1	3348
7	52614633	A	G	PASS	intergenic_region	MODIFIER	LOC111096769-LOC111096770	111096769-111096770	intergenic_region	111096769-111096770		-1	n.52614633A>G		-1	-1	-1	-1	-1	-1	0
7	52614634	G	T	PASS	downstream_gene_variant	MODIFIER	LOC111096769	111096769	transcript	XR_002628627.1	pseudogene	-1	n.*3349G>T		-1	-1	-1	-1	-1	-1	3349
7	52614634	G	T	PASS	downstream_gene_variant	MODIFIER	LOC111096769	111096769	transcript	XR_002628628.1	pseudogene	-1	n.*3349G>T		-1	-1	-1	-1	-1	-1	3349
7	52614634	G	T	PASS	intergenic_region	MODIFIER	LOC111096769-LOC111096770	111096769-111096770	intergenic_region	111096769-111096770		-1	n.52614634G>T		-1	-1	-1	-1	-1	-1	0
7	52614636	G	A	PASS	downstream_gene_variant	MODIFIER	LOC111096769	111096769	transcript	XR_002628627.1	pseudogene	-1	n.*3351G>A		-1	-1	-1	-1	-1	-1	3351
7	52614636	G	A	PASS	downstream_gene_variant	MODIFIER	LOC111096769	111096769	transcript	XR_002628628.1	pseudogene	-1	n.*3351G>A		-1	-1	-1	-1	-1	-1	3351
7	52614636	G	A	PASS	intergenic_region	MODIFIER	LOC111096769-LOC111096770	111096769-111096770	intergenic_region	111096769-111096770		-1	n.52614636G>A		-1	-1	-1	-1	-1	-1	0
7	57663307	A	AAACTTGAGTCATATTTGTATGGGATTCTCACCTAAAGGGATTGAGATCGAAGGTATTCAAAAGGGAAC	PASS	upstream_gene_variant	MODIFIER	TRAPPC8	480166	transcript	XM_022421504.1	protein_coding	-1	c.-1933_-1932insAACTTGAGTCATATTTGTATGGGATTCTCACCTAAAGGGATTGAGATCGAAGGTATTCAAAAGGGAAC		-1	-1	-1	-1	-1	-1	1901
7	57663307	A	AAACTTGAGTCATATTTGTATGGGATTCTCACCTAAAGGGATTGAGATCGAAGGTATTCAAAAGGGAAC	PASS	upstream_gene_variant	MODIFIER	TRAPPC8	480166	transcript	XM_005622929.3	protein_coding	-1	c.-1933_-1932insAACTTGAGTCATATTTGTATGGGATTCTCACCTAAAGGGATTGAGATCGAAGGTATTCAAAAGGGAAC		-1	-1	-1	-1	-1	-1	1901
7	57663307	A	AAACTTGAGTCATATTTGTATGGGATTCTCACCTAAAGGGATTGAGATCGAAGGTATTCAAAAGGGAAC	PASS	upstream_gene_variant	MODIFIER	TRAPPC8	480166	transcript	XM_022421505.1	protein_coding	-1	c.-1933_-1932insAACTTGAGTCATATTTGTATGGGATTCTCACCTAAAGGGATTGAGATCGAAGGTATTCAAAAGGGAAC		-1	-1	-1	-1	-1	-1	1901
7	57663307	A	AAACTTGAGTCATATTTGTATGGGATTCTCACCTAAAGGGATTGAGATCGAAGGTATTCAAAAGGGAAC	PASS	upstream_gene_variant	MODIFIER	TRAPPC8	480166	transcript	XM_537289.6	protein_coding	-1	c.-1933_-1932insAACTTGAGTCATATTTGTATGGGATTCTCACCTAAAGGGATTGAGATCGAAGGTATTCAAAAGGGAAC		-1	-1	-1	-1	-1	-1	1901
7	57663307	A	AAACTTGAGTCATATTTGTATGGGATTCTCACCTAAAGGGATTGAGATCGAAGGTATTCAAAAGGGAAC	PASS	intergenic_region	MODIFIER	RNF125-TRAPPC8	490498-480166	intergenic_region	490498-480166		-1	n.57663307_57663308insAACTTGAGTCATATTTGTATGGGATTCTCACCTAAAGGGATTGAGATCGAAGGTATTCAAAAGGGAAC		-1	-1	-1	-1	-1	-1	0
7	59677180	GAAGGAAGGAAGGAAGT	G	PASS	intergenic_region	MODIFIER	LOC100685690-490504	100685690-490504	intergenic_region	100685690-490504		-1	n.59677181_59677196delAAGGAAGGAAGGAAGT		-1	-1	-1	-1	-1	-1	0
7	64048602	CCCCCCCCCCCCA	C	PASS	intron_variant	MODIFIER	OSBPL1A	480761	transcript	XM_005622999.3	protein_coding	4	c.283-2792_283-2781delCCCCCCCCCCCA		-1	-1	-1	-1	-1	-1	0
7	64048602	CCCCCCCCCCCCA	C	PASS	intron_variant	MODIFIER	OSBPL1A	480761	transcript	XR_002628689.1	pseudogene	4	n.437-2792_437-2781delCCCCCCCCCCCA		-1	-1	-1	-1	-1	-1	0
7	64048602	CCCCCCCCCCCCA	C	PASS	intron_variant	MODIFIER	OSBPL1A	480761	transcript	XM_537881.6	protein_coding	4	c.283-2792_283-2781delCCCCCCCCCCCA		-1	-1	-1	-1	-1	-1	0
7	66219561	T	C	PASS	downstream_gene_variant	MODIFIER	MIR133A	100885978	transcript	NR_049420.1	pseudogene	-1	n.*1989T>C		-1	-1	-1	-1	-1	-1	1989
7	66219561	T	C	PASS	downstream_gene_variant	MODIFIER	MIR133A	100885978	transcript	TRANSCRIPT_100885978	pseudogene	-1	n.*2002T>C		-1	-1	-1	-1	-1	-1	2002
7	66219561	T	C	PASS	intron_variant	MODIFIER	MIB1	490521	transcript	XM_014115524.2	protein_coding	11	c.1580+5738A>G		-1	-1	-1	-1	-1	-1	0
7	67019177	A	ATCCCTGGGTGGCGCAGCGGTTTGGCGCCTGCCTTTGGCCCAGGGCGCGATCCTGGAGACCCGGG	PASS	upstream_gene_variant	MODIFIER	LOC490527	490527	transcript	490527	pseudogene	-1	n.-3832_-3831insCCCGGGTCTCCAGGATCGCGCCCTGGGCCAAAGGCAGGCGCCAAACCGCTGCGCCACCCAGGGA		-1	-1	-1	-1	-1	-1	3832
7	67019177	A	ATCCCTGGGTGGCGCAGCGGTTTGGCGCCTGCCTTTGGCCCAGGGCGCGATCCTGGAGACCCGGG	PASS	intergenic_region	MODIFIER	LOC490527-USP14	490527-480182	intergenic_region	490527-480182		-1	n.67019177_67019178insTCCCTGGGTGGCGCAGCGGTTTGGCGCCTGCCTTTGGCCCAGGGCGCGATCCTGGAGACCCGGG		-1	-1	-1	-1	-1	-1	0
7	67700831	G	GTGCAGTATTGCTTACTATAAACACAAAGCTGTATA	PASS	intergenic_region	MODIFIER	ADCYAP1-LOC111096804	607433-111096804	intergenic_region	607433-111096804		-1	n.67700831_67700832insTGCAGTATTGCTTACTATAAACACAAAGCTGTATA		-1	-1	-1	-1	-1	-1	0
7	68508327	G	A	PASS	intergenic_region	MODIFIER	LOC480188-LOC100683484	480188-100683484	intergenic_region	480188-100683484		-1	n.68508327G>A		-1	-1	-1	-1	-1	-1	0
7	68508331	G	A	PASS	intergenic_region	MODIFIER	LOC480188-LOC100683484	480188-100683484	intergenic_region	480188-100683484		-1	n.68508331G>A		-1	-1	-1	-1	-1	-1	0
7	72515428	T	C	PASS	intron_variant	MODIFIER	L3MBTL4	490541	transcript	XM_022421594.1	protein_coding	15	c.1087-13465A>G		-1	-1	-1	-1	-1	-1	0
7	72515428	T	C	PASS	intron_variant	MODIFIER	L3MBTL4	490541	transcript	XM_022421600.1	protein_coding	11	c.988-13465A>G		-1	-1	-1	-1	-1	-1	0
7	72515428	T	C	PASS	intron_variant	MODIFIER	L3MBTL4	490541	transcript	XM_022421596.1	protein_coding	12	c.1087-13465A>G		-1	-1	-1	-1	-1	-1	0
7	72515428	T	C	PASS	intron_variant	MODIFIER	L3MBTL4	490541	transcript	XM_014115575.2	protein_coding	15	c.982-13465A>G		-1	-1	-1	-1	-1	-1	0
7	72515428	T	C	PASS	intron_variant	MODIFIER	L3MBTL4	490541	transcript	XM_022421597.1	protein_coding	15	c.1087-13465A>G		-1	-1	-1	-1	-1	-1	0
7	72515428	T	C	PASS	intron_variant	MODIFIER	L3MBTL4	490541	transcript	XM_022421598.1	protein_coding	15	c.1018-13465A>G		-1	-1	-1	-1	-1	-1	0
7	72515428	T	C	PASS	intron_variant	MODIFIER	L3MBTL4	490541	transcript	XM_022421599.1	protein_coding	14	c.988-13465A>G		-1	-1	-1	-1	-1	-1	0
7	72515428	T	C	PASS	intron_variant	MODIFIER	L3MBTL4	490541	transcript	XM_022421595.1	protein_coding	13	c.1087-13465A>G		-1	-1	-1	-1	-1	-1	0
7	72515428	T	C	PASS	intron_variant	MODIFIER	L3MBTL4	490541	transcript	XM_022421601.1	protein_coding	15	c.1087-13465A>G		-1	-1	-1	-1	-1	-1	0
7	75751986	T	A	PASS	intron_variant	MODIFIER	RAB31	608485	transcript	XM_845517.5	protein_coding	3	c.201+8047T>A		-1	-1	-1	-1	-1	-1	0
7	75751986	T	A	PASS	intron_variant	MODIFIER	RAB31	608485	transcript	XR_002628777.1	pseudogene	3	n.318+8047T>A		-1	-1	-1	-1	-1	-1	0
7	75751986	T	A	PASS	intron_variant	MODIFIER	RAB31	608485	transcript	XM_022421633.1	protein_coding	2	c.132+8047T>A		-1	-1	-1	-1	-1	-1	0
7	77032505	A	ACAGGAG	PASS	intergenic_region	MODIFIER	LOC100686314-100686444	100686314-100686444	intergenic_region	100686314-100686444		-1	n.77032505_77032506insCAGGAG		-1	-1	-1	-1	-1	-1	0
7	78096293	T	G	PASS	upstream_gene_variant	MODIFIER	CEP76	480214	transcript	XM_014115596.2	protein_coding	-1	c.-3905A>C		-1	-1	-1	-1	-1	-1	3815
7	78096293	T	G	PASS	upstream_gene_variant	MODIFIER	CEP76	480214	transcript	XM_005623096.3	protein_coding	-1	c.-3905A>C		-1	-1	-1	-1	-1	-1	3815
7	78096293	T	G	PASS	upstream_gene_variant	MODIFIER	CEP76	480214	transcript	XM_014115597.2	protein_coding	-1	c.-4996A>C		-1	-1	-1	-1	-1	-1	4190
7	78096293	T	G	PASS	upstream_gene_variant	MODIFIER	CEP76	480214	transcript	XM_844971.5	protein_coding	-1	c.-3905A>C		-1	-1	-1	-1	-1	-1	3815
7	78096293	T	G	PASS	intron_variant	MODIFIER	PSMG2	480215	transcript	XM_537340.5	protein_coding	1	c.58-1494T>G		-1	-1	-1	-1	-1	-1	0
7	78096293	T	G	PASS	intron_variant	MODIFIER	PSMG2	480215	transcript	XM_005623098.3	protein_coding	1	c.-63-1494T>G		-1	-1	-1	-1	-1	-1	0
7	78759828	A	T	PASS	intron_variant	MODIFIER	MYO5B	480220	transcript	XM_014115608.2	protein_coding	1	c.28-62244A>T		-1	-1	-1	-1	-1	-1	0
7	78759835	C	CT	PASS	intron_variant	MODIFIER	MYO5B	480220	transcript	XM_014115608.2	protein_coding	1	c.28-62237_28-62236insT		-1	-1	-1	-1	-1	-1	0
7	78759879	G	A	PASS	intron_variant	MODIFIER	MYO5B	480220	transcript	XM_014115608.2	protein_coding	1	c.28-62193G>A		-1	-1	-1	-1	-1	-1	0
7	78759908	C	T	PASS	intron_variant	MODIFIER	MYO5B	480220	transcript	XM_014115608.2	protein_coding	1	c.28-62164C>T		-1	-1	-1	-1	-1	-1	0
7	78759912	C	T	PASS	intron_variant	MODIFIER	MYO5B	480220	transcript	XM_014115608.2	protein_coding	1	c.28-62160C>T		-1	-1	-1	-1	-1	-1	0
7	78759914	T	C	PASS	intron_variant	MODIFIER	MYO5B	480220	transcript	XM_014115608.2	protein_coding	1	c.28-62158T>C		-1	-1	-1	-1	-1	-1	0
7	80499209	A	C	PASS	downstream_gene_variant	MODIFIER	ZBTB7C	490573	transcript	XM_547695.6	protein_coding	-1	c.*5497A>C		-1	-1	-1	-1	-1	-1	3248
7	80499209	A	C	PASS	downstream_gene_variant	MODIFIER	LOC111096844	111096844	transcript	XR_002628836.1	pseudogene	-1	n.*3780T>G		-1	-1	-1	-1	-1	-1	3780
7	80499209	A	C	PASS	intergenic_region	MODIFIER	ZBTB7C-LOC111096844	490573-111096844	intergenic_region	490573-111096844		-1	n.80499209A>C		-1	-1	-1	-1	-1	-1	0
7	80499225	A	AT	PASS	downstream_gene_variant	MODIFIER	ZBTB7C	490573	transcript	XM_547695.6	protein_coding	-1	c.*5513_*5514insT		-1	-1	-1	-1	-1	-1	3265
7	80499225	A	AT	PASS	downstream_gene_variant	MODIFIER	LOC111096844	111096844	transcript	XR_002628836.1	pseudogene	-1	n.*3763_*3764insA		-1	-1	-1	-1	-1	-1	3763
7	80499225	A	AT	PASS	intergenic_region	MODIFIER	ZBTB7C-LOC111096844	490573-111096844	intergenic_region	490573-111096844		-1	n.80499225_80499226insT		-1	-1	-1	-1	-1	-1	0
8	475449	A	T	PASS	intron_variant	MODIFIER			transcript	TRANSCRIPT_	protein_coding	32	c.16768+411060A>T		-1	-1	-1	-1	-1	-1	0	WARNING_TRANSCRIPT_MULTIPLE_STOP_CODONS
8	822535	GAAAGAAAGAAAGAAAGAAAGAAAAAGAAGAAGAAGAAGAAGAAAGAA	G	PASS	intron_variant	MODIFIER			transcript	TRANSCRIPT_	protein_coding	32	c.16768+758147_16768+758193delAAAGAAAGAAAGAAAGAAAGAAAAAGAAGAAGAAGAAGAAGAAAGAA		-1	-1	-1	-1	-1	-1	0	WARNING_TRANSCRIPT_MULTIPLE_STOP_CODONS
8	1963433	C	CGCCCCAG	PASS	upstream_gene_variant	MODIFIER	LOC102156071	102156071	transcript	XR_292863.2	pseudogene	-1	n.-1983_-1982insCTGGGGC		-1	-1	-1	-1	-1	-1	1983
8	1963433	C	CGCCCCAG	PASS	intron_variant	MODIFIER			transcript	TRANSCRIPT_	protein_coding	32	c.16769-247434_16769-247433insGCCCCAG		-1	-1	-1	-1	-1	-1	0	WARNING_TRANSCRIPT_MULTIPLE_STOP_CODONS
8	1963452	CA	C	PASS	upstream_gene_variant	MODIFIER	LOC102156071	102156071	transcript	XR_292863.2	pseudogene	-1	n.-2002delT		-1	-1	-1	-1	-1	-1	2002
8	1963452	CA	C	PASS	intron_variant	MODIFIER			transcript	TRANSCRIPT_	protein_coding	32	c.16769-247414delA		-1	-1	-1	-1	-1	-1	0	WARNING_TRANSCRIPT_MULTIPLE_STOP_CODONS
8	13485708	T	TCAGAGGGAGAGCCC	PASS	intron_variant	MODIFIER			transcript	TRANSCRIPT_	protein_coding	144	c.37740+1756263_37740+1756264insCAGAGGGAGAGCCC		-1	-1	-1	-1	-1	-1	0	WARNING_TRANSCRIPT_MULTIPLE_STOP_CODONS
8	13485708	T	TCAGAGGGAGAGCCC	PASS	intron_variant	MODIFIER	SNX6	490648	transcript	XM_547770.7	protein_coding	8	c.718+4844_718+4845insGGGCTCTCCCTCTG		-1	-1	-1	-1	-1	-1	0
8	13485708	T	TCAGAGGGAGAGCCC	PASS	intron_variant	MODIFIER	SNX6	490648	transcript	XM_022421916.1	protein_coding	8	c.718+4844_718+4845insGGGCTCTCCCTCTG		-1	-1	-1	-1	-1	-1	0
8	16538160	A	G	PASS	intron_variant	MODIFIER			transcript	TRANSCRIPT_	protein_coding	144	c.37740+4808715A>G		-1	-1	-1	-1	-1	-1	0	WARNING_TRANSCRIPT_MULTIPLE_STOP_CODONS
8	18436386	C	T	PASS	intron_variant	MODIFIER			transcript	TRANSCRIPT_	protein_coding	144	c.37741-6613902C>T		-1	-1	-1	-1	-1	-1	0	WARNING_TRANSCRIPT_MULTIPLE_STOP_CODONS
8	18436400	C	G	PASS	intron_variant	MODIFIER			transcript	TRANSCRIPT_	protein_coding	144	c.37741-6613888C>G		-1	-1	-1	-1	-1	-1	0	WARNING_TRANSCRIPT_MULTIPLE_STOP_CODONS
8	18436411	CG	C	PASS	intron_variant	MODIFIER			transcript	TRANSCRIPT_	protein_coding	144	c.37741-6613876delG		-1	-1	-1	-1	-1	-1	0	WARNING_TRANSCRIPT_MULTIPLE_STOP_CODONS
8	19078028	G	A	PASS	intron_variant	MODIFIER			transcript	TRANSCRIPT_	protein_coding	144	c.37741-5972260G>A		-1	-1	-1	-1	-1	-1	0	WARNING_TRANSCRIPT_MULTIPLE_STOP_CODONS
8	19078029	C	T	PASS	intron_variant	MODIFIER			transcript	TRANSCRIPT_	protein_coding	144	c.37741-5972259C>T		-1	-1	-1	-1	-1	-1	0	WARNING_TRANSCRIPT_MULTIPLE_STOP_CODONS
8	19078093	C	A	PASS	intron_variant	MODIFIER			transcript	TRANSCRIPT_	protein_coding	144	c.37741-5972195C>A		-1	-1	-1	-1	-1	-1	0	WARNING_TRANSCRIPT_MULTIPLE_STOP_CODONS
8	22717005	C	A	PASS	intron_variant	MODIFIER			transcript	TRANSCRIPT_	protein_coding	144	c.37741-2333283C>A		-1	-1	-1	-1	-1	-1	0	WARNING_TRANSCRIPT_MULTIPLE_STOP_CODONS
8	22717007	T	A	PASS	intron_variant	MODIFIER			transcript	TRANSCRIPT_	protein_coding	144	c.37741-2333281T>A		-1	-1	-1	-1	-1	-1	0	WARNING_TRANSCRIPT_MULTIPLE_STOP_CODONS
8	23888002	A	T	PASS	intron_variant	MODIFIER			transcript	TRANSCRIPT_	protein_coding	144	c.37741-1162286A>T		-1	-1	-1	-1	-1	-1	0	WARNING_TRANSCRIPT_MULTIPLE_STOP_CODONS
8	23888002	A	T	PASS	intron_variant	MODIFIER	MDGA2	480310	transcript	XM_537432.6	protein_coding	10	c.2239-8360T>A		-1	-1	-1	-1	-1	-1	0
8	23888002	A	T	PASS	intron_variant	MODIFIER	MDGA2	480310	transcript	XR_002629112.1	pseudogene	10	n.2376-8360T>A		-1	-1	-1	-1	-1	-1	0
8	23888026	C	T	PASS	intron_variant	MODIFIER			transcript	TRANSCRIPT_	protein_coding	144	c.37741-1162262C>T		-1	-1	-1	-1	-1	-1	0	WARNING_TRANSCRIPT_MULTIPLE_STOP_CODONS
8	23888026	C	T	PASS	intron_variant	MODIFIER	MDGA2	480310	transcript	XM_537432.6	protein_coding	10	c.2239-8384G>A		-1	-1	-1	-1	-1	-1	0
8	23888026	C	T	PASS	intron_variant	MODIFIER	MDGA2	480310	transcript	XR_002629112.1	pseudogene	10	n.2376-8384G>A		-1	-1	-1	-1	-1	-1	0
8	24966951	T	A	PASS	intron_variant	MODIFIER			transcript	TRANSCRIPT_	protein_coding	144	c.37741-83337T>A		-1	-1	-1	-1	-1	-1	0	WARNING_TRANSCRIPT_MULTIPLE_STOP_CODONS
8	24966993	C	CAG	PASS	intron_variant	MODIFIER			transcript	TRANSCRIPT_	protein_coding	144	c.37741-83295_37741-83294insAG		-1	-1	-1	-1	-1	-1	0	WARNING_TRANSCRIPT_MULTIPLE_STOP_CODONS
8	24968504	T	TTTTC	PASS	intron_variant	MODIFIER			transcript	TRANSCRIPT_	protein_coding	144	c.37741-81784_37741-81783insTTTC		-1	-1	-1	-1	-1	-1	0	WARNING_TRANSCRIPT_MULTIPLE_STOP_CODONS
8	25181055	CT	C	PASS	intron_variant	MODIFIER			transcript	TRANSCRIPT_	protein_coding	157	c.40387-809delT		-1	-1	-1	-1	-1	-1	0	WARNING_TRANSCRIPT_MULTIPLE_STOP_CODONS
8	25181055	CT	C	PASS	intron_variant	MODIFIER	LOC111097260	111097260	transcript	111097260	pseudogene	3	n.742-53376delA		-1	-1	-1	-1	-1	-1	0
8	26344560	A	AGTGTTTTAAGGCTGAGCGAATTTCGATGCAACAAAGG	PASS	downstream_gene_variant	MODIFIER	KLHDC1	490677	transcript	XM_005623376.3	protein_coding	-1	c.*2538_*2539insGTGTTTTAAGGCTGAGCGAATTTCGATGCAACAAAGG		-1	-1	-1	-1	-1	-1	2290
8	26344560	A	AGTGTTTTAAGGCTGAGCGAATTTCGATGCAACAAAGG	PASS	intron_variant	MODIFIER			transcript	TRANSCRIPT_	protein_coding	232	c.54919-2061_54919-2060insGTGTTTTAAGGCTGAGCGAATTTCGATGCAACAAAGG		-1	-1	-1	-1	-1	-1	0	WARNING_TRANSCRIPT_MULTIPLE_STOP_CODONS
8	26344560	A	AGTGTTTTAAGGCTGAGCGAATTTCGATGCAACAAAGG	PASS	intron_variant	MODIFIER	KLHDC1	490677	transcript	XM_547799.6	protein_coding	12	c.1035-2661_1035-2660insGTGTTTTAAGGCTGAGCGAATTTCGATGCAACAAAGG		-1	-1	-1	-1	-1	-1	0
8	26344560	A	AGTGTTTTAAGGCTGAGCGAATTTCGATGCAACAAAGG	PASS	intron_variant	MODIFIER	KLHDC1	490677	transcript	XM_022421979.1	protein_coding	11	c.951-2661_951-2660insGTGTTTTAAGGCTGAGCGAATTTCGATGCAACAAAGG		-1	-1	-1	-1	-1	-1	0
8	26344560	A	AGTGTTTTAAGGCTGAGCGAATTTCGATGCAACAAAGG	PASS	intron_variant	MODIFIER	KLHDC1	490677	transcript	XM_022421980.1	protein_coding	10	c.846-2661_846-2660insGTGTTTTAAGGCTGAGCGAATTTCGATGCAACAAAGG		-1	-1	-1	-1	-1	-1	0
8	28033289	T	TA	PASS	intron_variant	MODIFIER			transcript	TRANSCRIPT_	protein_coding	283	c.64611+401488_64611+401489insA		-1	-1	-1	-1	-1	-1	0	WARNING_TRANSCRIPT_MULTIPLE_STOP_CODONS
8	28033291	T	TACACCATCA	PASS	intron_variant	MODIFIER			transcript	TRANSCRIPT_	protein_coding	283	c.64611+401490_64611+401491insACACCATCA		-1	-1	-1	-1	-1	-1	0	WARNING_TRANSCRIPT_MULTIPLE_STOP_CODONS
8	28033295	T	TGAAGAATCTAAGACAA	PASS	intron_variant	MODIFIER			transcript	TRANSCRIPT_	protein_coding	283	c.64611+401494_64611+401495insGAAGAATCTAAGACAA		-1	-1	-1	-1	-1	-1	0	WARNING_TRANSCRIPT_MULTIPLE_STOP_CODONS
8	28033297	T	TGTCTTACAAGGTATATCACATTCTG	PASS	intron_variant	MODIFIER			transcript	TRANSCRIPT_	protein_coding	283	c.64611+401496_64611+401497insGTCTTACAAGGTATATCACATTCTG		-1	-1	-1	-1	-1	-1	0	WARNING_TRANSCRIPT_MULTIPLE_STOP_CODONS
8	34157164	A	T	PASS	intron_variant	MODIFIER			transcript	TRANSCRIPT_	protein_coding	283	c.64612-3316917A>T		-1	-1	-1	-1	-1	-1	0	WARNING_TRANSCRIPT_MULTIPLE_STOP_CODONS
8	34157171	C	A	PASS	intron_variant	MODIFIER			transcript	TRANSCRIPT_	protein_coding	283	c.64612-3316910C>A		-1	-1	-1	-1	-1	-1	0	WARNING_TRANSCRIPT_MULTIPLE_STOP_CODONS
8	34157184	C	G	PASS	intron_variant	MODIFIER			transcript	TRANSCRIPT_	protein_coding	283	c.64612-3316897C>G		-1	-1	-1	-1	-1	-1	0	WARNING_TRANSCRIPT_MULTIPLE_STOP_CODONS
8	34157187	A	G	PASS	intron_variant	MODIFIER			transcript	TRANSCRIPT_	protein_coding	283	c.64612-3316894A>G		-1	-1	-1	-1	-1	-1	0	WARNING_TRANSCRIPT_MULTIPLE_STOP_CODONS
8	34157190	C	G	PASS	intron_variant	MODIFIER			transcript	TRANSCRIPT_	protein_coding	283	c.64612-3316891C>G		-1	-1	-1	-1	-1	-1	0	WARNING_TRANSCRIPT_MULTIPLE_STOP_CODONS
8	34995816	T	C	PASS	intron_variant	MODIFIER			transcript	TRANSCRIPT_	protein_coding	283	c.64612-2478265T>C		-1	-1	-1	-1	-1	-1	0	WARNING_TRANSCRIPT_MULTIPLE_STOP_CODONS
8	34995816	T	C	PASS	intron_variant	MODIFIER	RTN1	474178	transcript	XM_022421749.1	protein_coding	1	c.13+33358A>G		-1	-1	-1	-1	-1	-1	0
8	40919418	A	AG	PASS	intron_variant	MODIFIER			transcript	TRANSCRIPT_	protein_coding	306	c.69286+3078080_69286+3078081insG		-1	-1	-1	-1	-1	-1	0	WARNING_TRANSCRIPT_MULTIPLE_STOP_CODONS
8	40919418	A	AG	PASS	intron_variant	MODIFIER	GPHN	490739	transcript	XM_005623530.3	protein_coding	5	c.334-10989_334-10988insG		-1	-1	-1	-1	-1	-1	0
8	40919418	A	AG	PASS	intron_variant	MODIFIER	GPHN	490739	transcript	XM_022422123.1	protein_coding	5	c.334-10989_334-10988insG		-1	-1	-1	-1	-1	-1	0
8	40919418	A	AG	PASS	intron_variant	MODIFIER	GPHN	490739	transcript	XM_022422121.1	protein_coding	5	c.334-10989_334-10988insG		-1	-1	-1	-1	-1	-1	0
8	40919418	A	AG	PASS	intron_variant	MODIFIER	GPHN	490739	transcript	XM_022422122.1	protein_coding	4	c.295-10989_295-10988insG		-1	-1	-1	-1	-1	-1	0
8	40919418	A	AG	PASS	intron_variant	MODIFIER	GPHN	490739	transcript	XM_005623533.3	protein_coding	5	c.334-10989_334-10988insG		-1	-1	-1	-1	-1	-1	0
8	40919418	A	AG	PASS	intron_variant	MODIFIER	GPHN	490739	transcript	XM_022422124.1	protein_coding	4	c.295-10989_295-10988insG		-1	-1	-1	-1	-1	-1	0
8	40919418	A	AG	PASS	intron_variant	MODIFIER	GPHN	490739	transcript	XM_014115977.2	protein_coding	5	c.334-10989_334-10988insG		-1	-1	-1	-1	-1	-1	0
8	40919418	A	AG	PASS	intron_variant	MODIFIER	GPHN	490739	transcript	XM_003435031.4	protein_coding	4	c.295-10989_295-10988insG		-1	-1	-1	-1	-1	-1	0
8	40919418	A	AG	PASS	intron_variant	MODIFIER	GPHN	490739	transcript	XM_003435032.4	protein_coding	4	c.295-10989_295-10988insG		-1	-1	-1	-1	-1	-1	0
8	40919418	A	AG	PASS	intron_variant	MODIFIER	GPHN	490739	transcript	XM_022422125.1	protein_coding	1	c.-36-10989_-36-10988insG		-1	-1	-1	-1	-1	-1	0
8	43584721	GGGGC	G	PASS	intron_variant	MODIFIER			transcript	TRANSCRIPT_	protein_coding	306	c.69286+5743384_69286+5743387delGGGC		-1	-1	-1	-1	-1	-1	0	WARNING_TRANSCRIPT_MULTIPLE_STOP_CODONS
8	43638428	G	T	PASS	intron_variant	MODIFIER			transcript	TRANSCRIPT_	protein_coding	306	c.69286+5797090G>T		-1	-1	-1	-1	-1	-1	0	WARNING_TRANSCRIPT_MULTIPLE_STOP_CODONS
8	43638428	G	T	PASS	intron_variant	MODIFIER	SMOC1	480373	transcript	XM_014116013.2	protein_coding	1	c.99+29769G>T		-1	-1	-1	-1	-1	-1	0
8	43638428	G	T	PASS	intron_variant	MODIFIER	SMOC1	480373	transcript	XM_005623584.3	protein_coding	1	c.99+29769G>T		-1	-1	-1	-1	-1	-1	0
8	43638428	G	T	PASS	intron_variant	MODIFIER	SMOC1	480373	transcript	XM_005623585.3	protein_coding	1	c.99+29769G>T		-1	-1	-1	-1	-1	-1	0
8	43638428	G	T	PASS	intron_variant	MODIFIER	SMOC1	480373	transcript	XM_005623586.3	protein_coding	1	c.99+29769G>T		-1	-1	-1	-1	-1	-1	0
8	43638428	G	T	PASS	intron_variant	MODIFIER	SMOC1	480373	transcript	XM_022422169.1	protein_coding	1	c.99+29769G>T		-1	-1	-1	-1	-1	-1	0
8	60753374	T	TGTTCGCATCTTTCTCTCACTCACGCAGCCCACCTCTTTGGAATCCATTGCTTCCGCATGTCTGCCTCGTGTACCCGATGGTGTGCCCCGTGAAGACAG	PASS	upstream_gene_variant	MODIFIER	LOC111097138	111097138	transcript	XR_002629401.1	pseudogene	-1	n.-3823_-3822insGTTCGCATCTTTCTCTCACTCACGCAGCCCACCTCTTTGGAATCCATTGCTTCCGCATGTCTGCCTCGTGTACCCGATGGTGTGCCCCGTGAAGACAG		-1	-1	-1	-1	-1	-1	3822
8	60753374	T	TGTTCGCATCTTTCTCTCACTCACGCAGCCCACCTCTTTGGAATCCATTGCTTCCGCATGTCTGCCTCGTGTACCCGATGGTGTGCCCCGTGAAGACAG	PASS	intron_variant	MODIFIER			transcript	TRANSCRIPT_	protein_coding	306	c.69287-12097361_69287-12097360insGTTCGCATCTTTCTCTCACTCACGCAGCCCACCTCTTTGGAATCCATTGCTTCCGCATGTCTGCCTCGTGTACCCGATGGTGTGCCCCGTGAAGACAG		-1	-1	-1	-1	-1	-1	0	WARNING_TRANSCRIPT_MULTIPLE_STOP_CODONS
8	60753374	T	TGTTCGCATCTTTCTCTCACTCACGCAGCCCACCTCTTTGGAATCCATTGCTTCCGCATGTCTGCCTCGTGTACCCGATGGTGTGCCCCGTGAAGACAG	PASS	intron_variant	MODIFIER	LOC111097138	111097138	transcript	XR_002629402.1	pseudogene	1	n.1358+3456_1358+3457insGTTCGCATCTTTCTCTCACTCACGCAGCCCACCTCTTTGGAATCCATTGCTTCCGCATGTCTGCCTCGTGTACCCGATGGTGTGCCCCGTGAAGACAG		-1	-1	-1	-1	-1	-1	0
8	61778475	C	CG	PASS	downstream_gene_variant	MODIFIER	LOC111097188	111097188	transcript	XM_022422462.1	protein_coding	-1	c.*841_*842insG		-1	-1	-1	-1	-1	-1	50
8	61778475	C	CG	PASS	intron_variant	MODIFIER			transcript	TRANSCRIPT_	protein_coding	306	c.69287-11072260_69287-11072259insG		-1	-1	-1	-1	-1	-1	0	WARNING_TRANSCRIPT_MULTIPLE_STOP_CODONS
8	62759701	GTC	G	PASS	intron_variant	MODIFIER			transcript	TRANSCRIPT_	protein_coding	306	c.69287-10091033_69287-10091032delTC		-1	-1	-1	-1	-1	-1	0	WARNING_TRANSCRIPT_MULTIPLE_STOP_CODONS
8	62759701	GTC	G	PASS	intron_variant	MODIFIER	UNC79	612347	transcript	XM_022422338.1	protein_coding	32	c.5846-5145_5846-5144delTC		-1	-1	-1	-1	-1	-1	0
8	64987797	G	A	PASS	intron_variant	MODIFIER			transcript	TRANSCRIPT_	protein_coding	306	c.69287-7862938G>A		-1	-1	-1	-1	-1	-1	0	WARNING_TRANSCRIPT_MULTIPLE_STOP_CODONS
8	64987797	G	A	PASS	intron_variant	MODIFIER	BDKRB2	403658	transcript	NM_001003095.1	protein_coding	1	c.-40-10878G>A		-1	-1	-1	-1	-1	-1	0
8	64987797	G	A	PASS	intron_variant	MODIFIER	BDKRB2	403658	transcript	XM_005623175.3	protein_coding	1	c.-212-5500G>A		-1	-1	-1	-1	-1	-1	0
8	68460670	T	G	PASS	downstream_gene_variant	MODIFIER	DEGS2	490854	transcript	XM_547976.5	protein_coding	-1	c.*2885A>C		-1	-1	-1	-1	-1	-1	791
8	68460670	T	G	PASS	intron_variant	MODIFIER			transcript	TRANSCRIPT_	protein_coding	306	c.69287-4390065T>G		-1	-1	-1	-1	-1	-1	0	WARNING_TRANSCRIPT_MULTIPLE_STOP_CODONS
8	68460670	T	G	PASS	intron_variant	MODIFIER	EVL	480433	transcript	XM_005623795.3	protein_coding	13	c.1235-565T>G		-1	-1	-1	-1	-1	-1	0
8	68460670	T	G	PASS	intron_variant	MODIFIER	EVL	480433	transcript	XM_005623796.3	protein_coding	12	c.1172-565T>G		-1	-1	-1	-1	-1	-1	0
8	68460670	T	G	PASS	intron_variant	MODIFIER	EVL	480433	transcript	XM_537553.6	protein_coding	13	c.1223-565T>G		-1	-1	-1	-1	-1	-1	0
8	70281465	CTTTCTCTT	C	PASS	upstream_gene_variant	MODIFIER	ZNF839	612606	transcript	XM_005623827.2	protein_coding	-1	c.-3860_-3853delTTTCTCTT		-1	-1	-1	-1	-1	-1	3823
8	70281465	CTTTCTCTT	C	PASS	downstream_gene_variant	MODIFIER	LOC111097171	111097171	transcript	XR_002629559.1	pseudogene	-1	n.*3144_*3151delTTTCTCTT		-1	-1	-1	-1	-1	-1	3144
8	70281465	CTTTCTCTT	C	PASS	downstream_gene_variant	MODIFIER	TRNAI-AAU	111097263	transcript	111097263	pseudogene	-1	n.*677_*684delTTTCTCTT		-1	-1	-1	-1	-1	-1	677
8	70281465	CTTTCTCTT	C	PASS	intron_variant	MODIFIER			transcript	TRANSCRIPT_	protein_coding	306	c.69287-2569269_69287-2569262delTTTCTCTT		-1	-1	-1	-1	-1	-1	0	WARNING_TRANSCRIPT_MULTIPLE_STOP_CODONS
8	70303875	T	A	PASS	downstream_gene_variant	MODIFIER	ZNF839	612606	transcript	XM_005623827.2	protein_coding	-1	c.*1657T>A		-1	-1	-1	-1	-1	-1	1520
8	70303875	T	A	PASS	downstream_gene_variant	MODIFIER	CINP	612609	transcript	XM_850344.5	protein_coding	-1	c.*3831A>T		-1	-1	-1	-1	-1	-1	3589
8	70303875	T	A	PASS	intron_variant	MODIFIER			transcript	TRANSCRIPT_	protein_coding	306	c.69287-2546860T>A		-1	-1	-1	-1	-1	-1	0	WARNING_TRANSCRIPT_MULTIPLE_STOP_CODONS
8	70444846	A	G	PASS	upstream_gene_variant	MODIFIER	ANKRD9	490865	transcript	XM_014116161.2	protein_coding	-1	c.-2288T>C		-1	-1	-1	-1	-1	-1	1099
8	70444846	A	G	PASS	upstream_gene_variant	MODIFIER	LOC106559203	106559203	transcript	XR_002629560.1	pseudogene	-1	n.-36A>G		-1	-1	-1	-1	-1	-1	36
8	70444846	A	G	PASS	upstream_gene_variant	MODIFIER	ANKRD9	490865	transcript	XM_547987.6	protein_coding	-1	c.-2288T>C		-1	-1	-1	-1	-1	-1	1051
8	70444846	A	G	PASS	intron_variant	MODIFIER			transcript	TRANSCRIPT_	protein_coding	306	c.69287-2405889A>G		-1	-1	-1	-1	-1	-1	0	WARNING_TRANSCRIPT_MULTIPLE_STOP_CODONS
8	70444846	A	G	PASS	intron_variant	MODIFIER	ANKRD9	490865	transcript	XM_022422395.1	protein_coding	1	c.-109+585T>C		-1	-1	-1	-1	-1	-1	0
8	72271469	A	AGAGCCCAGCTACCTGAGGCCAGCCCACCCAAGGCTAGCTCACCTGAGGCCAGTCCACCT	PASS	upstream_gene_variant	MODIFIER	LOC102153864	102153864	transcript	XM_005623942.1	protein_coding	-1	c.-3740_-3739insGAGCCCAGCTACCTGAGGCCAGCCCACCCAAGGCTAGCTCACCTGAGGCCAGTCCACCT		-1	-1	-1	-1	-1	-1	3739
8	72271469	A	AGAGCCCAGCTACCTGAGGCCAGCCCACCCAAGGCTAGCTCACCTGAGGCCAGTCCACCT	PASS	intron_variant	MODIFIER			transcript	TRANSCRIPT_	protein_coding	306	c.69287-579266_69287-579265insGAGCCCAGCTACCTGAGGCCAGCCCACCCAAGGCTAGCTCACCTGAGGCCAGTCCACCT		-1	-1	-1	-1	-1	-1	0	WARNING_TRANSCRIPT_MULTIPLE_STOP_CODONS
8	72271469	A	AGAGCCCAGCTACCTGAGGCCAGCCCACCCAAGGCTAGCTCACCTGAGGCCAGTCCACCT	PASS	intron_variant	MODIFIER	LOC490877	490877	transcript	XM_005623872.3	protein_coding	2	c.488-454_488-453insGAGCCCAGCTACCTGAGGCCAGCCCACCCAAGGCTAGCTCACCTGAGGCCAGTCCACCT		-1	-1	-1	-1	-1	-1	0
8	72271469	A	AGAGCCCAGCTACCTGAGGCCAGCCCACCCAAGGCTAGCTCACCTGAGGCCAGTCCACCT	PASS	intron_variant	MODIFIER	LOC490877	490877	transcript	XM_547999.6	protein_coding	2	c.488-454_488-453insGAGCCCAGCTACCTGAGGCCAGCCCACCCAAGGCTAGCTCACCTGAGGCCAGTCCACCT		-1	-1	-1	-1	-1	-1	0
8	72547811	A	C	PASS	intron_variant	MODIFIER			transcript	TRANSCRIPT_	protein_coding	306	c.69287-302924A>C		-1	-1	-1	-1	-1	-1	0	WARNING_TRANSCRIPT_MULTIPLE_STOP_CODONS
8	72547811	A	C	PASS	intron_variant	MODIFIER	JAG2	490882	transcript	XM_022422427.1	protein_coding	4	c.419+726T>G		-1	-1	-1	-1	-1	-1	0
8	72920515	C	A	PASS	upstream_gene_variant	MODIFIER	LOC102153980	102153980	transcript	102153980	pseudogene	-1	n.-3969G>T		-1	-1	-1	-1	-1	-1	3969
8	72920515	C	A	PASS	downstream_gene_variant	MODIFIER	LOC100855842	100855842	transcript	100855842	pseudogene	-1	n.*1320G>T		-1	-1	-1	-1	-1	-1	1320
8	72920515	C	A	PASS	intron_variant	MODIFIER			transcript	TRANSCRIPT_	protein_coding	323	c.72898+3984C>A		-1	-1	-1	-1	-1	-1	0	WARNING_TRANSCRIPT_MULTIPLE_STOP_CODONS
8	73455606	ACAGTGTAAGAGGGTTCCTTTTTCTCCG	A	PASS	intron_variant	MODIFIER			transcript	TRANSCRIPT_	protein_coding	350	c.78373-10360_78373-10334delCAGTGTAAGAGGGTTCCTTTTTCTCCG		-1	-1	-1	-1	-1	-1	0	WARNING_TRANSCRIPT_MULTIPLE_STOP_CODONS
8	73455606	ACAGTGTAAGAGGGTTCCTTTTTCTCCG	A	PASS	intron_variant	MODIFIER	LOC106559110	106559110	transcript	106559110	pseudogene	2	n.462+10332_462+10358delCGGAGAAAAAGGAACCCTCTTACACTG		-1	-1	-1	-1	-1	-1	0
8	73455670	A	G	PASS	intron_variant	MODIFIER			transcript	TRANSCRIPT_	protein_coding	350	c.78373-10297A>G		-1	-1	-1	-1	-1	-1	0	WARNING_TRANSCRIPT_MULTIPLE_STOP_CODONS
8	73455670	A	G	PASS	intron_variant	MODIFIER	LOC106559110	106559110	transcript	106559110	pseudogene	2	n.462+10295T>C		-1	-1	-1	-1	-1	-1	0
8	73455677	C	T	PASS	intron_variant	MODIFIER			transcript	TRANSCRIPT_	protein_coding	350	c.78373-10290C>T		-1	-1	-1	-1	-1	-1	0	WARNING_TRANSCRIPT_MULTIPLE_STOP_CODONS
8	73455677	C	T	PASS	intron_variant	MODIFIER	LOC106559110	106559110	transcript	106559110	pseudogene	2	n.462+10288G>A		-1	-1	-1	-1	-1	-1	0
8	73462686	T	C	PASS	intron_variant	MODIFIER			transcript	TRANSCRIPT_	protein_coding	350	c.78373-3281T>C		-1	-1	-1	-1	-1	-1	0	WARNING_TRANSCRIPT_MULTIPLE_STOP_CODONS
8	73462686	T	C	PASS	intron_variant	MODIFIER	LOC106559110	106559110	transcript	106559110	pseudogene	2	n.462+3279A>G		-1	-1	-1	-1	-1	-1	0
8	73922308	C	G	PASS	intron_variant	MODIFIER			transcript	TRANSCRIPT_	protein_coding	378	c.83687-33518C>G		-1	-1	-1	-1	-1	-1	0	WARNING_TRANSCRIPT_MULTIPLE_STOP_CODONS
9	3190609	G	GGC	PASS	intron_variant	MODIFIER	LOC111097519	111097519	transcript	XR_002630331.1	pseudogene	1	n.259-591_259-590insGC		-1	-1	-1	-1	-1	-1	0
9	7934740	T	A	PASS	intergenic_region	MODIFIER	LOC111097303-LOC111097525	111097303-111097525	intergenic_region	111097303-111097525		-1	n.7934740T>A		-1	-1	-1	-1	-1	-1	0
9	8887879	A	G	PASS	intergenic_region	MODIFIER	LOC111097306-LOC100856042	111097306-100856042	intergenic_region	111097306-100856042		-1	n.8887879A>G		-1	-1	-1	-1	-1	-1	0
9	8887889	A	G	PASS	intergenic_region	MODIFIER	LOC111097306-LOC100856042	111097306-100856042	intergenic_region	111097306-100856042		-1	n.8887889A>G		-1	-1	-1	-1	-1	-1	0
9	8887895	A	C	PASS	intergenic_region	MODIFIER	LOC111097306-LOC100856042	111097306-100856042	intergenic_region	111097306-100856042		-1	n.8887895A>C		-1	-1	-1	-1	-1	-1	0
9	8887926	A	G	PASS	intergenic_region	MODIFIER	LOC111097306-LOC100856042	111097306-100856042	intergenic_region	111097306-100856042		-1	n.8887926A>G		-1	-1	-1	-1	-1	-1	0
9	8887941	A	G	PASS	intergenic_region	MODIFIER	LOC111097306-LOC100856042	111097306-100856042	intergenic_region	111097306-100856042		-1	n.8887941A>G		-1	-1	-1	-1	-1	-1	0
9	8887942	A	G	PASS	intergenic_region	MODIFIER	LOC111097306-LOC100856042	111097306-100856042	intergenic_region	111097306-100856042		-1	n.8887942A>G		-1	-1	-1	-1	-1	-1	0
9	8887943	A	G	PASS	intergenic_region	MODIFIER	LOC111097306-LOC100856042	111097306-100856042	intergenic_region	111097306-100856042		-1	n.8887943A>G		-1	-1	-1	-1	-1	-1	0
9	8887945	A	G	PASS	intergenic_region	MODIFIER	LOC111097306-LOC100856042	111097306-100856042	intergenic_region	111097306-100856042		-1	n.8887945A>G		-1	-1	-1	-1	-1	-1	0
9	8887956	A	G	PASS	intergenic_region	MODIFIER	LOC111097306-LOC100856042	111097306-100856042	intergenic_region	111097306-100856042		-1	n.8887956A>G		-1	-1	-1	-1	-1	-1	0
9	8887958	A	G	PASS	intergenic_region	MODIFIER	LOC111097306-LOC100856042	111097306-100856042	intergenic_region	111097306-100856042		-1	n.8887958A>G		-1	-1	-1	-1	-1	-1	0
9	8887962	A	G	PASS	intergenic_region	MODIFIER	LOC111097306-LOC100856042	111097306-100856042	intergenic_region	111097306-100856042		-1	n.8887962A>G		-1	-1	-1	-1	-1	-1	0
9	8887984	A	G	PASS	intergenic_region	MODIFIER	LOC111097306-LOC100856042	111097306-100856042	intergenic_region	111097306-100856042		-1	n.8887984A>G		-1	-1	-1	-1	-1	-1	0
9	8887997	A	G	PASS	intergenic_region	MODIFIER	LOC111097306-LOC100856042	111097306-100856042	intergenic_region	111097306-100856042		-1	n.8887997A>G		-1	-1	-1	-1	-1	-1	0
9	8887998	A	G	PASS	intergenic_region	MODIFIER	LOC111097306-LOC100856042	111097306-100856042	intergenic_region	111097306-100856042		-1	n.8887998A>G		-1	-1	-1	-1	-1	-1	0
9	8888171	A	G	PASS	intergenic_region	MODIFIER	LOC111097306-LOC100856042	111097306-100856042	intergenic_region	111097306-100856042		-1	n.8888171A>G		-1	-1	-1	-1	-1	-1	0
9	8888173	A	G	PASS	intergenic_region	MODIFIER	LOC111097306-LOC100856042	111097306-100856042	intergenic_region	111097306-100856042		-1	n.8888173A>G		-1	-1	-1	-1	-1	-1	0
9	8888180	A	G	PASS	intergenic_region	MODIFIER	LOC111097306-LOC100856042	111097306-100856042	intergenic_region	111097306-100856042		-1	n.8888180A>G		-1	-1	-1	-1	-1	-1	0
9	8888206	A	G	PASS	intergenic_region	MODIFIER	LOC111097306-LOC100856042	111097306-100856042	intergenic_region	111097306-100856042		-1	n.8888206A>G		-1	-1	-1	-1	-1	-1	0
9	8888231	A	G	PASS	intergenic_region	MODIFIER	LOC111097306-LOC100856042	111097306-100856042	intergenic_region	111097306-100856042		-1	n.8888231A>G		-1	-1	-1	-1	-1	-1	0
9	8959347	TA	T	PASS	non_coding_transcript_exon_variant	MODIFIER	LOC100856042	100856042	transcript	100856042	pseudogene	1	n.2284delT		-1	-1	-1	-1	-1	-1	0
9	12521295	AT	A	PASS	intron_variant	MODIFIER	LOC100686474	100686474	transcript	100686474	pseudogene	4	n.699+283delA		-1	-1	-1	-1	-1	-1	0
9	14879412	A	G	PASS	upstream_gene_variant	MODIFIER	RGS9	490902	transcript	XM_005624274.3	protein_coding	-1	c.-762T>C		-1	-1	-1	-1	-1	-1	641
9	14879412	A	G	PASS	upstream_gene_variant	MODIFIER	RGS9	490902	transcript	XM_548024.6	protein_coding	-1	c.-762T>C		-1	-1	-1	-1	-1	-1	641
9	14879412	A	G	PASS	intron_variant	MODIFIER	RGS9	490902	transcript	XM_022422860.1	protein_coding	1	c.58-11397T>C		-1	-1	-1	-1	-1	-1	0
9	14879416	A	G	PASS	upstream_gene_variant	MODIFIER	RGS9	490902	transcript	XM_005624274.3	protein_coding	-1	c.-766T>C		-1	-1	-1	-1	-1	-1	645
9	14879416	A	G	PASS	upstream_gene_variant	MODIFIER	RGS9	490902	transcript	XM_548024.6	protein_coding	-1	c.-766T>C		-1	-1	-1	-1	-1	-1	645
9	14879416	A	G	PASS	intron_variant	MODIFIER	RGS9	490902	transcript	XM_022422860.1	protein_coding	1	c.58-11401T>C		-1	-1	-1	-1	-1	-1	0
9	14879420	A	G	PASS	upstream_gene_variant	MODIFIER	RGS9	490902	transcript	XM_005624274.3	protein_coding	-1	c.-770T>C		-1	-1	-1	-1	-1	-1	649
9	14879420	A	G	PASS	upstream_gene_variant	MODIFIER	RGS9	490902	transcript	XM_548024.6	protein_coding	-1	c.-770T>C		-1	-1	-1	-1	-1	-1	649
9	14879420	A	G	PASS	intron_variant	MODIFIER	RGS9	490902	transcript	XM_022422860.1	protein_coding	1	c.58-11405T>C		-1	-1	-1	-1	-1	-1	0
9	14879424	A	G	PASS	upstream_gene_variant	MODIFIER	RGS9	490902	transcript	XM_005624274.3	protein_coding	-1	c.-774T>C		-1	-1	-1	-1	-1	-1	653
9	14879424	A	G	PASS	upstream_gene_variant	MODIFIER	RGS9	490902	transcript	XM_548024.6	protein_coding	-1	c.-774T>C		-1	-1	-1	-1	-1	-1	653
9	14879424	A	G	PASS	intron_variant	MODIFIER	RGS9	490902	transcript	XM_022422860.1	protein_coding	1	c.58-11409T>C		-1	-1	-1	-1	-1	-1	0
9	14879428	A	G	PASS	upstream_gene_variant	MODIFIER	RGS9	490902	transcript	XM_005624274.3	protein_coding	-1	c.-778T>C		-1	-1	-1	-1	-1	-1	657
9	14879428	A	G	PASS	upstream_gene_variant	MODIFIER	RGS9	490902	transcript	XM_548024.6	protein_coding	-1	c.-778T>C		-1	-1	-1	-1	-1	-1	657
9	14879428	A	G	PASS	intron_variant	MODIFIER	RGS9	490902	transcript	XM_022422860.1	protein_coding	1	c.58-11413T>C		-1	-1	-1	-1	-1	-1	0
9	15255563	G	T	PASS	intergenic_region	MODIFIER	FAM20A-LOC610995	480458-610995	intergenic_region	480458-610995		-1	n.15255563G>T		-1	-1	-1	-1	-1	-1	0
9	17926448	C	A	PASS	downstream_gene_variant	MODIFIER	LOC111097339	111097339	transcript	XR_002629843.1	pseudogene	-1	n.*3413C>A		-1	-1	-1	-1	-1	-1	3413
9	17926448	C	A	PASS	intergenic_region	MODIFIER	LOC111097339-LOC102153199	111097339-102153199	intergenic_region	111097339-102153199		-1	n.17926448C>A		-1	-1	-1	-1	-1	-1	0
9	17926461	G	A	PASS	downstream_gene_variant	MODIFIER	LOC111097339	111097339	transcript	XR_002629843.1	pseudogene	-1	n.*3426G>A		-1	-1	-1	-1	-1	-1	3426
9	17926461	G	A	PASS	intergenic_region	MODIFIER	LOC111097339-LOC102153199	111097339-102153199	intergenic_region	111097339-102153199		-1	n.17926461G>A		-1	-1	-1	-1	-1	-1	0
9	23664223	G	GGC	PASS	downstream_gene_variant	MODIFIER	SRCIN1	491037	transcript	XM_014116609.2	protein_coding	-1	c.*4983_*4984insGC		-1	-1	-1	-1	-1	-1	4364
9	23664223	G	GGC	PASS	downstream_gene_variant	MODIFIER	SRCIN1	491037	transcript	XM_022423043.1	protein_coding	-1	c.*4983_*4984insGC		-1	-1	-1	-1	-1	-1	4364
9	23664223	G	GGC	PASS	downstream_gene_variant	MODIFIER	SRCIN1	491037	transcript	XM_022423042.1	protein_coding	-1	c.*4983_*4984insGC		-1	-1	-1	-1	-1	-1	4364
9	23664223	G	GGC	PASS	downstream_gene_variant	MODIFIER	SRCIN1	491037	transcript	XM_022423036.1	protein_coding	-1	c.*4983_*4984insGC		-1	-1	-1	-1	-1	-1	4364
9	23664223	G	GGC	PASS	downstream_gene_variant	MODIFIER	SRCIN1	491037	transcript	XM_022423038.1	protein_coding	-1	c.*4983_*4984insGC		-1	-1	-1	-1	-1	-1	4364
9	23664223	G	GGC	PASS	downstream_gene_variant	MODIFIER	SRCIN1	491037	transcript	XM_014116611.2	protein_coding	-1	c.*4983_*4984insGC		-1	-1	-1	-1	-1	-1	4364
9	23664223	G	GGC	PASS	downstream_gene_variant	MODIFIER	SRCIN1	491037	transcript	XM_005624586.3	protein_coding	-1	c.*4983_*4984insGC		-1	-1	-1	-1	-1	-1	4364
9	23664223	G	GGC	PASS	downstream_gene_variant	MODIFIER	SRCIN1	491037	transcript	XM_014116612.2	protein_coding	-1	c.*4983_*4984insGC		-1	-1	-1	-1	-1	-1	4364
9	23664223	G	GGC	PASS	downstream_gene_variant	MODIFIER	SRCIN1	491037	transcript	XM_022423039.1	protein_coding	-1	c.*4983_*4984insGC		-1	-1	-1	-1	-1	-1	4364
9	23664223	G	GGC	PASS	downstream_gene_variant	MODIFIER	SRCIN1	491037	transcript	XM_022423040.1	protein_coding	-1	c.*4983_*4984insGC		-1	-1	-1	-1	-1	-1	4364
9	23664223	G	GGC	PASS	downstream_gene_variant	MODIFIER	SRCIN1	491037	transcript	XM_022423044.1	protein_coding	-1	c.*4983_*4984insGC		-1	-1	-1	-1	-1	-1	4364
9	23664223	G	GGC	PASS	downstream_gene_variant	MODIFIER	SRCIN1	491037	transcript	XM_022423046.1	protein_coding	-1	c.*4983_*4984insGC		-1	-1	-1	-1	-1	-1	4364
9	23664223	G	GGC	PASS	downstream_gene_variant	MODIFIER	SRCIN1	491037	transcript	XM_022423047.1	protein_coding	-1	c.*4983_*4984insGC		-1	-1	-1	-1	-1	-1	4364
9	23664223	G	GGC	PASS	downstream_gene_variant	MODIFIER	SRCIN1	491037	transcript	XM_022423048.1	protein_coding	-1	c.*4983_*4984insGC		-1	-1	-1	-1	-1	-1	4364
9	23664223	G	GGC	PASS	downstream_gene_variant	MODIFIER	SRCIN1	491037	transcript	XM_022423049.1	protein_coding	-1	c.*4983_*4984insGC		-1	-1	-1	-1	-1	-1	4364
9	23664223	G	GGC	PASS	intron_variant	MODIFIER	SRCIN1	491037	transcript	XM_022423041.1	protein_coding	22	c.4435-174_4435-173insGC		-1	-1	-1	-1	-1	-1	0
9	23664223	G	GGC	PASS	intron_variant	MODIFIER	SRCIN1	491037	transcript	XM_014116613.2	protein_coding	21	c.3850-174_3850-173insGC		-1	-1	-1	-1	-1	-1	0
9	23664223	G	GGC	PASS	intron_variant	MODIFIER	SRCIN1	491037	transcript	XM_014116614.2	protein_coding	20	c.3727-174_3727-173insGC		-1	-1	-1	-1	-1	-1	0
9	23664223	G	GGC	PASS	intron_variant	MODIFIER	SRCIN1	491037	transcript	XM_014116615.2	protein_coding	19	c.3625-174_3625-173insGC		-1	-1	-1	-1	-1	-1	0
9	25089984	C	CGGGATCGG	PASS	intergenic_region	MODIFIER	CALCOCO2-ATP5G1	480545-491061	intergenic_region	480545-491061		-1	n.25089984_25089985insGGGATCGG		-1	-1	-1	-1	-1	-1	0
9	25153392	GGGGGGGGGGGGGGGGGGGGGGGGGGGGGGGGGGAGGCGGGGGCAGCAGGTGGGTAGCTGCGCCGTGTTTAACCTTCCCCGCTCTGACTGTGTGGCAC	G	PASS	downstream_gene_variant	MODIFIER	UBE2Z	491062	transcript	XM_022423078.1	protein_coding	-1	c.*4576_*4672delGGGGGGGGGGGGGGGGGGGGGGGGGGGGGGGGGAGGCGGGGGCAGCAGGTGGGTAGCTGCGCCGTGTTTAACCTTCCCCGCTCTGACTGTGTGGCAC		-1	-1	-1	-1	-1	-1	2699
9	25153392	GGGGGGGGGGGGGGGGGGGGGGGGGGGGGGGGGGAGGCGGGGGCAGCAGGTGGGTAGCTGCGCCGTGTTTAACCTTCCCCGCTCTGACTGTGTGGCAC	G	PASS	intron_variant	MODIFIER	SNF8	491063	transcript	XM_548183.6	protein_coding	6	c.565-194_565-98delGTGCCACACAGTCAGAGCGGGGAAGGTTAAACACGGCGCAGCTACCCACCTGCTGCCCCCGCCTCCCCCCCCCCCCCCCCCCCCCCCCCCCCCCCCC		-1	-1	-1	-1	-1	-1	0
9	25153392	GGGGGGGGGGGGGGGGGGGGGGGGGGGGGGGGGGAGGCGGGGGCAGCAGGTGGGTAGCTGCGCCGTGTTTAACCTTCCCCGCTCTGACTGTGTGGCAC	G	PASS	intron_variant	MODIFIER	SNF8	491063	transcript	XM_022423077.1	protein_coding	6	c.565-194_565-98delGTGCCACACAGTCAGAGCGGGGAAGGTTAAACACGGCGCAGCTACCCACCTGCTGCCCCCGCCTCCCCCCCCCCCCCCCCCCCCCCCCCCCCCCCCC		-1	-1	-1	-1	-1	-1	0
9	27913680	T	C	PASS	intergenic_region	MODIFIER	CA10-LOC111097536	609477-111097536	intergenic_region	609477-111097536		-1	n.27913680T>C		-1	-1	-1	-1	-1	-1	0
9	27988179	CTA	C	PASS	intron_variant	MODIFIER	LOC111097536	111097536	transcript	XR_002630349.1	pseudogene	5	n.774+1429_774+1430delTA		-1	-1	-1	-1	-1	-1	0
9	27988179	CTA	C	PASS	intron_variant	MODIFIER	LOC111097536	111097536	transcript	XR_002630350.1	pseudogene	4	n.627+1429_627+1430delTA		-1	-1	-1	-1	-1	-1	0
9	27988179	CTA	C	PASS	intron_variant	MODIFIER	LOC111097536	111097536	transcript	XR_002630351.1	pseudogene	4	n.651+1429_651+1430delTA		-1	-1	-1	-1	-1	-1	0
9	27996340	A	AG	PASS	intron_variant	MODIFIER	LOC111097536	111097536	transcript	XR_002630349.1	pseudogene	1	n.207+1563_207+1564insC		-1	-1	-1	-1	-1	-1	0
9	27996340	A	AG	PASS	intron_variant	MODIFIER	LOC111097536	111097536	transcript	XR_002630350.1	pseudogene	1	n.207+1563_207+1564insC		-1	-1	-1	-1	-1	-1	0
9	27996340	A	AG	PASS	intron_variant	MODIFIER	LOC111097536	111097536	transcript	XR_002630351.1	pseudogene	1	n.207+1563_207+1564insC		-1	-1	-1	-1	-1	-1	0
9	28018483	A	C	PASS	intergenic_region	MODIFIER	LOC111097536-LOC111097383	111097536-111097383	intergenic_region	111097536-111097383		-1	n.28018483A>C		-1	-1	-1	-1	-1	-1	0
9	28018842	C	T	PASS	intergenic_region	MODIFIER	LOC111097536-LOC111097383	111097536-111097383	intergenic_region	111097536-111097383		-1	n.28018842C>T		-1	-1	-1	-1	-1	-1	0
9	28064761	G	A	PASS	intergenic_region	MODIFIER	LOC111097536-LOC111097383	111097536-111097383	intergenic_region	111097536-111097383		-1	n.28064761G>A		-1	-1	-1	-1	-1	-1	0
9	28127093	A	AG	PASS	intergenic_region	MODIFIER	LOC111097536-LOC111097383	111097536-111097383	intergenic_region	111097536-111097383		-1	n.28127093_28127094insG		-1	-1	-1	-1	-1	-1	0
9	28135889	G	A	PASS	intergenic_region	MODIFIER	LOC111097536-LOC111097383	111097536-111097383	intergenic_region	111097536-111097383		-1	n.28135889G>A		-1	-1	-1	-1	-1	-1	0
9	28163899	C	T	PASS	intergenic_region	MODIFIER	LOC111097536-LOC111097383	111097536-111097383	intergenic_region	111097536-111097383		-1	n.28163899C>T		-1	-1	-1	-1	-1	-1	0
9	28196161	A	G	PASS	intron_variant	MODIFIER	LOC111097383	111097383	transcript	XR_002629971.1	pseudogene	4	n.425+7340A>G		-1	-1	-1	-1	-1	-1	0
9	28196161	A	G	PASS	intron_variant	MODIFIER	LOC111097383	111097383	transcript	XR_002629970.1	pseudogene	4	n.398+7340A>G		-1	-1	-1	-1	-1	-1	0
9	28202253	A	G	PASS	intron_variant	MODIFIER	LOC111097383	111097383	transcript	XR_002629971.1	pseudogene	4	n.425+13432A>G		-1	-1	-1	-1	-1	-1	0
9	28202253	A	G	PASS	intron_variant	MODIFIER	LOC111097383	111097383	transcript	XR_002629970.1	pseudogene	4	n.398+13432A>G		-1	-1	-1	-1	-1	-1	0
9	28202261	T	C	PASS	intron_variant	MODIFIER	LOC111097383	111097383	transcript	XR_002629971.1	pseudogene	4	n.425+13440T>C		-1	-1	-1	-1	-1	-1	0
9	28202261	T	C	PASS	intron_variant	MODIFIER	LOC111097383	111097383	transcript	XR_002629970.1	pseudogene	4	n.398+13440T>C		-1	-1	-1	-1	-1	-1	0
9	28363794	GTA	G	PASS	intron_variant	MODIFIER	LOC106559279	106559279	transcript	XR_002629972.1	pseudogene	3	n.572+3170_572+3171delTA		-1	-1	-1	-1	-1	-1	0
9	28363794	GTA	G	PASS	intron_variant	MODIFIER	LOC106559279	106559279	transcript	XR_001316853.2	pseudogene	3	n.572+3170_572+3171delTA		-1	-1	-1	-1	-1	-1	0
9	28363813	T	G	PASS	intron_variant	MODIFIER	LOC106559279	106559279	transcript	XR_002629972.1	pseudogene	3	n.572+3153A>C		-1	-1	-1	-1	-1	-1	0
9	28363813	T	G	PASS	intron_variant	MODIFIER	LOC106559279	106559279	transcript	XR_001316853.2	pseudogene	3	n.572+3153A>C		-1	-1	-1	-1	-1	-1	0
9	28566145	C	G	PASS	intergenic_region	MODIFIER	LOC111097384-LOC111097537	111097384-111097537	intergenic_region	111097384-111097537		-1	n.28566145C>G		-1	-1	-1	-1	-1	-1	0
9	29224118	T	C	PASS	intron_variant	MODIFIER	KIF2B	102156876	transcript	XM_005624987.2	protein_coding	1	c.66-218T>C		-1	-1	-1	-1	-1	-1	0
9	29386562	C	CCACCTAAATGTAAAATACATTTTTCCCTGGGAAAACTCTTTTGGCTGTCCATA	PASS	intergenic_region	MODIFIER	609509-LOC111097538	609509-111097538	intergenic_region	609509-111097538		-1	n.29386562_29386563insCACCTAAATGTAAAATACATTTTTCCCTGGGAAAACTCTTTTGGCTGTCCATA		-1	-1	-1	-1	-1	-1	0
9	30075134	CACTTAT	C	PASS	upstream_gene_variant	MODIFIER	STXBP4	491094	transcript	XM_022423129.1	protein_coding	-1	c.-18167_-18162delACTTAT		-1	-1	-1	-1	-1	-1	4662
9	30075134	CACTTAT	C	PASS	upstream_gene_variant	MODIFIER	STXBP4	491094	transcript	XM_022423145.1	protein_coding	-1	c.-18167_-18162delACTTAT		-1	-1	-1	-1	-1	-1	4662
9	30075134	CACTTAT	C	PASS	upstream_gene_variant	MODIFIER	STXBP4	491094	transcript	XM_022423144.1	protein_coding	-1	c.-18167_-18162delACTTAT		-1	-1	-1	-1	-1	-1	4662
9	30075134	CACTTAT	C	PASS	upstream_gene_variant	MODIFIER	STXBP4	491094	transcript	XM_022423141.1	protein_coding	-1	c.-18167_-18162delACTTAT		-1	-1	-1	-1	-1	-1	4662
9	30075134	CACTTAT	C	PASS	upstream_gene_variant	MODIFIER	STXBP4	491094	transcript	XM_005624687.3	protein_coding	-1	c.-18167_-18162delACTTAT		-1	-1	-1	-1	-1	-1	4662
9	30075134	CACTTAT	C	PASS	upstream_gene_variant	MODIFIER	STXBP4	491094	transcript	XM_022423140.1	protein_coding	-1	c.-18167_-18162delACTTAT		-1	-1	-1	-1	-1	-1	4662
9	30075134	CACTTAT	C	PASS	upstream_gene_variant	MODIFIER	STXBP4	491094	transcript	XM_022423142.1	protein_coding	-1	c.-18167_-18162delACTTAT		-1	-1	-1	-1	-1	-1	4662
9	30075134	CACTTAT	C	PASS	upstream_gene_variant	MODIFIER	STXBP4	491094	transcript	XM_022423132.1	protein_coding	-1	c.-18167_-18162delACTTAT		-1	-1	-1	-1	-1	-1	4662
9	30075134	CACTTAT	C	PASS	upstream_gene_variant	MODIFIER	STXBP4	491094	transcript	XM_022423134.1	protein_coding	-1	c.-22080_-22075delACTTAT		-1	-1	-1	-1	-1	-1	4662
9	30075134	CACTTAT	C	PASS	upstream_gene_variant	MODIFIER	STXBP4	491094	transcript	XM_022423135.1	protein_coding	-1	c.-22080_-22075delACTTAT		-1	-1	-1	-1	-1	-1	4662
9	30075134	CACTTAT	C	PASS	upstream_gene_variant	MODIFIER	STXBP4	491094	transcript	XM_022423136.1	protein_coding	-1	c.-22080_-22075delACTTAT		-1	-1	-1	-1	-1	-1	4662
9	30075134	CACTTAT	C	PASS	upstream_gene_variant	MODIFIER	STXBP4	491094	transcript	XM_022423137.1	protein_coding	-1	c.-22080_-22075delACTTAT		-1	-1	-1	-1	-1	-1	4662
9	30075134	CACTTAT	C	PASS	upstream_gene_variant	MODIFIER	STXBP4	491094	transcript	XM_022423133.1	protein_coding	-1	c.-20220_-20215delACTTAT		-1	-1	-1	-1	-1	-1	4662
9	30075134	CACTTAT	C	PASS	upstream_gene_variant	MODIFIER	STXBP4	491094	transcript	XM_022423146.1	protein_coding	-1	c.-22141_-22136delACTTAT		-1	-1	-1	-1	-1	-1	4662
9	30075134	CACTTAT	C	PASS	upstream_gene_variant	MODIFIER	STXBP4	491094	transcript	XM_022423147.1	protein_coding	-1	c.-22141_-22136delACTTAT		-1	-1	-1	-1	-1	-1	4662
9	30075134	CACTTAT	C	PASS	upstream_gene_variant	MODIFIER	STXBP4	491094	transcript	XM_022423150.1	protein_coding	-1	c.-22141_-22136delACTTAT		-1	-1	-1	-1	-1	-1	4662
9	30075134	CACTTAT	C	PASS	upstream_gene_variant	MODIFIER	STXBP4	491094	transcript	XM_022423148.1	protein_coding	-1	c.-22141_-22136delACTTAT		-1	-1	-1	-1	-1	-1	4662
9	30075134	CACTTAT	C	PASS	upstream_gene_variant	MODIFIER	STXBP4	491094	transcript	XM_022423155.1	protein_coding	-1	c.-18167_-18162delACTTAT		-1	-1	-1	-1	-1	-1	4662
9	30075134	CACTTAT	C	PASS	upstream_gene_variant	MODIFIER	STXBP4	491094	transcript	XM_022423143.1	protein_coding	-1	c.-18167_-18162delACTTAT		-1	-1	-1	-1	-1	-1	4662
9	30075134	CACTTAT	C	PASS	upstream_gene_variant	MODIFIER	STXBP4	491094	transcript	XM_022423139.1	protein_coding	-1	c.-22080_-22075delACTTAT		-1	-1	-1	-1	-1	-1	4703
9	30075134	CACTTAT	C	PASS	upstream_gene_variant	MODIFIER	STXBP4	491094	transcript	XM_022423153.1	protein_coding	-1	c.-22141_-22136delACTTAT		-1	-1	-1	-1	-1	-1	4703
9	30075134	CACTTAT	C	PASS	downstream_gene_variant	MODIFIER	TOM1L1	491093	transcript	XM_847759.5	protein_coding	-1	c.*3488_*3493delACTTAT		-1	-1	-1	-1	-1	-1	2103
9	30075134	CACTTAT	C	PASS	downstream_gene_variant	MODIFIER	TOM1L1	491093	transcript	XM_022423156.1	protein_coding	-1	c.*3488_*3493delACTTAT		-1	-1	-1	-1	-1	-1	2103
9	30075134	CACTTAT	C	PASS	downstream_gene_variant	MODIFIER	TOM1L1	491093	transcript	XM_005624696.3	protein_coding	-1	c.*3481_*3486delACTTAT		-1	-1	-1	-1	-1	-1	2103
9	30075134	CACTTAT	C	PASS	downstream_gene_variant	MODIFIER	TOM1L1	491093	transcript	XM_005624697.3	protein_coding	-1	c.*3488_*3493delACTTAT		-1	-1	-1	-1	-1	-1	2103
9	30075134	CACTTAT	C	PASS	intron_variant	MODIFIER	COX11	609555	transcript	XM_861377.5	protein_coding	2	c.523-348_523-343delATAAGT		-1	-1	-1	-1	-1	-1	0
9	30081943	T	A	PASS	upstream_gene_variant	MODIFIER	COX11	609555	transcript	XM_861377.5	protein_coding	-1	c.-2194A>T		-1	-1	-1	-1	-1	-1	2140
9	30081943	T	A	PASS	intron_variant	MODIFIER	STXBP4	491094	transcript	XM_022423129.1	protein_coding	1	c.-153+2019T>A		-1	-1	-1	-1	-1	-1	0
9	30081943	T	A	PASS	intron_variant	MODIFIER	STXBP4	491094	transcript	XM_022423145.1	protein_coding	1	c.-153+2019T>A		-1	-1	-1	-1	-1	-1	0
9	30081943	T	A	PASS	intron_variant	MODIFIER	STXBP4	491094	transcript	XM_022423144.1	protein_coding	1	c.-153+2019T>A		-1	-1	-1	-1	-1	-1	0
9	30081943	T	A	PASS	intron_variant	MODIFIER	STXBP4	491094	transcript	XM_022423141.1	protein_coding	1	c.-153+2019T>A		-1	-1	-1	-1	-1	-1	0
9	30081943	T	A	PASS	intron_variant	MODIFIER	STXBP4	491094	transcript	XM_005624687.3	protein_coding	1	c.-153+2019T>A		-1	-1	-1	-1	-1	-1	0
9	30081943	T	A	PASS	intron_variant	MODIFIER	STXBP4	491094	transcript	XM_022423140.1	protein_coding	1	c.-153+2019T>A		-1	-1	-1	-1	-1	-1	0
9	30081943	T	A	PASS	intron_variant	MODIFIER	STXBP4	491094	transcript	XM_022423142.1	protein_coding	1	c.-153+2019T>A		-1	-1	-1	-1	-1	-1	0
9	30081943	T	A	PASS	intron_variant	MODIFIER	STXBP4	491094	transcript	XM_022423132.1	protein_coding	1	c.-153+2019T>A		-1	-1	-1	-1	-1	-1	0
9	30081943	T	A	PASS	intron_variant	MODIFIER	STXBP4	491094	transcript	XM_022423134.1	protein_coding	1	c.-263+2019T>A		-1	-1	-1	-1	-1	-1	0
9	30081943	T	A	PASS	intron_variant	MODIFIER	STXBP4	491094	transcript	XM_022423135.1	protein_coding	1	c.-227+2019T>A		-1	-1	-1	-1	-1	-1	0
9	30081943	T	A	PASS	intron_variant	MODIFIER	STXBP4	491094	transcript	XM_022423136.1	protein_coding	1	c.-200+2019T>A		-1	-1	-1	-1	-1	-1	0
9	30081943	T	A	PASS	intron_variant	MODIFIER	STXBP4	491094	transcript	XM_022423137.1	protein_coding	1	c.-94+2019T>A		-1	-1	-1	-1	-1	-1	0
9	30081943	T	A	PASS	intron_variant	MODIFIER	STXBP4	491094	transcript	XM_022423133.1	protein_coding	1	c.-226+2019T>A		-1	-1	-1	-1	-1	-1	0
9	30081943	T	A	PASS	intron_variant	MODIFIER	STXBP4	491094	transcript	XM_022423146.1	protein_coding	1	c.-277+2019T>A		-1	-1	-1	-1	-1	-1	0
9	30081943	T	A	PASS	intron_variant	MODIFIER	STXBP4	491094	transcript	XM_022423147.1	protein_coding	1	c.-288+2019T>A		-1	-1	-1	-1	-1	-1	0
9	30081943	T	A	PASS	intron_variant	MODIFIER	STXBP4	491094	transcript	XM_022423150.1	protein_coding	1	c.-155+2019T>A		-1	-1	-1	-1	-1	-1	0
9	30081943	T	A	PASS	intron_variant	MODIFIER	STXBP4	491094	transcript	XM_022423148.1	protein_coding	1	c.-261+2019T>A		-1	-1	-1	-1	-1	-1	0
9	30081943	T	A	PASS	intron_variant	MODIFIER	STXBP4	491094	transcript	XM_022423155.1	protein_coding	1	c.-153+2019T>A		-1	-1	-1	-1	-1	-1	0
9	30081943	T	A	PASS	intron_variant	MODIFIER	STXBP4	491094	transcript	XM_022423143.1	protein_coding	1	c.-153+2019T>A		-1	-1	-1	-1	-1	-1	0
9	30081943	T	A	PASS	intron_variant	MODIFIER	STXBP4	491094	transcript	XM_022423139.1	protein_coding	1	c.-17+2019T>A		-1	-1	-1	-1	-1	-1	0
9	30081943	T	A	PASS	intron_variant	MODIFIER	STXBP4	491094	transcript	XM_022423153.1	protein_coding	1	c.-78+2019T>A		-1	-1	-1	-1	-1	-1	0
9	30081943	T	A	PASS	intron_variant	MODIFIER	STXBP4	491094	transcript	XM_022423130.1	protein_coding	1	c.-153+974T>A		-1	-1	-1	-1	-1	-1	0
9	30255184	C	A	PASS	intron_variant	MODIFIER	STXBP4	491094	transcript	XM_022423129.1	protein_coding	19	c.1706+6967C>A		-1	-1	-1	-1	-1	-1	0
9	30255184	C	A	PASS	intron_variant	MODIFIER	STXBP4	491094	transcript	XM_022423142.1	protein_coding	19	c.1707-4624C>A		-1	-1	-1	-1	-1	-1	0
9	30255184	C	A	PASS	intron_variant	MODIFIER	STXBP4	491094	transcript	XM_022423132.1	protein_coding	18	c.1646+6967C>A		-1	-1	-1	-1	-1	-1	0
9	30255184	C	A	PASS	intron_variant	MODIFIER	STXBP4	491094	transcript	XM_022423134.1	protein_coding	19	c.1583+6967C>A		-1	-1	-1	-1	-1	-1	0
9	30255184	C	A	PASS	intron_variant	MODIFIER	STXBP4	491094	transcript	XM_022423135.1	protein_coding	18	c.1583+6967C>A		-1	-1	-1	-1	-1	-1	0
9	30255184	C	A	PASS	intron_variant	MODIFIER	STXBP4	491094	transcript	XM_022423136.1	protein_coding	18	c.1583+6967C>A		-1	-1	-1	-1	-1	-1	0
9	30255184	C	A	PASS	intron_variant	MODIFIER	STXBP4	491094	transcript	XM_022423137.1	protein_coding	17	c.1583+6967C>A		-1	-1	-1	-1	-1	-1	0
9	30255184	C	A	PASS	intron_variant	MODIFIER	STXBP4	491094	transcript	XM_022423133.1	protein_coding	19	c.1604+6967C>A		-1	-1	-1	-1	-1	-1	0
9	30255184	C	A	PASS	intron_variant	MODIFIER	STXBP4	491094	transcript	XM_022423146.1	protein_coding	17	c.1415+6967C>A		-1	-1	-1	-1	-1	-1	0
9	30255184	C	A	PASS	intron_variant	MODIFIER	STXBP4	491094	transcript	XM_022423147.1	protein_coding	17	c.1415+6967C>A		-1	-1	-1	-1	-1	-1	0
9	30255184	C	A	PASS	intron_variant	MODIFIER	STXBP4	491094	transcript	XM_022423150.1	protein_coding	16	c.1415+6967C>A		-1	-1	-1	-1	-1	-1	0
9	30255184	C	A	PASS	intron_variant	MODIFIER	STXBP4	491094	transcript	XM_022423148.1	protein_coding	17	c.1415+6967C>A		-1	-1	-1	-1	-1	-1	0
9	30255184	C	A	PASS	intron_variant	MODIFIER	STXBP4	491094	transcript	XM_022423155.1	protein_coding	17	c.1379+6967C>A		-1	-1	-1	-1	-1	-1	0
9	30255184	C	A	PASS	intron_variant	MODIFIER	STXBP4	491094	transcript	XM_022423143.1	protein_coding	17	c.1517+6967C>A		-1	-1	-1	-1	-1	-1	0
9	30255184	C	A	PASS	intron_variant	MODIFIER	STXBP4	491094	transcript	XM_022423139.1	protein_coding	16	c.1583+6967C>A		-1	-1	-1	-1	-1	-1	0
9	30255184	C	A	PASS	intron_variant	MODIFIER	STXBP4	491094	transcript	XM_022423153.1	protein_coding	15	c.1415+6967C>A		-1	-1	-1	-1	-1	-1	0
9	30255184	C	A	PASS	intron_variant	MODIFIER	STXBP4	491094	transcript	XM_022423130.1	protein_coding	19	c.1706+6967C>A		-1	-1	-1	-1	-1	-1	0
9	30255184	C	A	PASS	intron_variant	MODIFIER	STXBP4	491094	transcript	XM_022423152.1	protein_coding	16	c.1415+6967C>A		-1	-1	-1	-1	-1	-1	0
9	30255184	C	A	PASS	intron_variant	MODIFIER	STXBP4	491094	transcript	XM_022423151.1	protein_coding	16	c.1415+6967C>A		-1	-1	-1	-1	-1	-1	0
9	30255184	C	A	PASS	intron_variant	MODIFIER	STXBP4	491094	transcript	XM_022423138.1	protein_coding	17	c.1583+6967C>A		-1	-1	-1	-1	-1	-1	0
9	30255184	C	A	PASS	intron_variant	MODIFIER	STXBP4	491094	transcript	XM_022423131.1	protein_coding	16	c.1634+6967C>A		-1	-1	-1	-1	-1	-1	0
9	30255184	C	A	PASS	intron_variant	MODIFIER	STXBP4	491094	transcript	XM_022423154.1	protein_coding	15	c.1415+6967C>A		-1	-1	-1	-1	-1	-1	0
9	30255184	C	A	PASS	intron_variant	MODIFIER	STXBP4	491094	transcript	XM_022423149.1	protein_coding	15	c.1415+6967C>A		-1	-1	-1	-1	-1	-1	0
9	30672855	C	T	PASS	downstream_gene_variant	MODIFIER	LOC100685036	100685036	transcript	100685036	pseudogene	-1	n.*3605G>A		-1	-1	-1	-1	-1	-1	3605
9	30672855	C	T	PASS	intergenic_region	MODIFIER	LOC111097540-LOC100685036	111097540-100685036	intergenic_region	111097540-100685036		-1	n.30672855C>T		-1	-1	-1	-1	-1	-1	0
9	31083816	T	G	PASS	intergenic_region	MODIFIER	LOC111097542-LOC491099	111097542-491099	intergenic_region	111097542-491099		-1	n.31083816T>G		-1	-1	-1	-1	-1	-1	0
9	31155339	A	C	PASS	intron_variant	MODIFIER	LOC491099	491099	transcript	XM_548219.6	protein_coding	2	c.62+4198A>C		-1	-1	-1	-1	-1	-1	0
9	31155339	A	C	PASS	intron_variant	MODIFIER	LOC491099	491099	transcript	XM_022423171.1	protein_coding	2	c.62+4198A>C		-1	-1	-1	-1	-1	-1	0
9	31155339	A	C	PASS	intron_variant	MODIFIER	LOC491099	491099	transcript	XM_022423170.1	protein_coding	2	c.62+4198A>C		-1	-1	-1	-1	-1	-1	0
9	31155339	A	C	PASS	intron_variant	MODIFIER	LOC491099	491099	transcript	XR_002630010.1	pseudogene	2	n.631+4198A>C		-1	-1	-1	-1	-1	-1	0
9	31156045	A	G	PASS	intron_variant	MODIFIER	LOC491099	491099	transcript	XM_548219.6	protein_coding	2	c.62+4904A>G		-1	-1	-1	-1	-1	-1	0
9	31156045	A	G	PASS	intron_variant	MODIFIER	LOC491099	491099	transcript	XM_022423171.1	protein_coding	2	c.62+4904A>G		-1	-1	-1	-1	-1	-1	0
9	31156045	A	G	PASS	intron_variant	MODIFIER	LOC491099	491099	transcript	XM_022423170.1	protein_coding	2	c.62+4904A>G		-1	-1	-1	-1	-1	-1	0
9	31156045	A	G	PASS	intron_variant	MODIFIER	LOC491099	491099	transcript	XR_002630010.1	pseudogene	2	n.631+4904A>G		-1	-1	-1	-1	-1	-1	0
9	31156348	C	T	PASS	intron_variant	MODIFIER	LOC491099	491099	transcript	XM_548219.6	protein_coding	2	c.62+5207C>T		-1	-1	-1	-1	-1	-1	0
9	31156348	C	T	PASS	intron_variant	MODIFIER	LOC491099	491099	transcript	XM_022423171.1	protein_coding	2	c.62+5207C>T		-1	-1	-1	-1	-1	-1	0
9	31156348	C	T	PASS	intron_variant	MODIFIER	LOC491099	491099	transcript	XM_022423170.1	protein_coding	2	c.62+5207C>T		-1	-1	-1	-1	-1	-1	0
9	31156348	C	T	PASS	intron_variant	MODIFIER	LOC491099	491099	transcript	XR_002630010.1	pseudogene	2	n.631+5207C>T		-1	-1	-1	-1	-1	-1	0
9	31156424	C	T	PASS	intron_variant	MODIFIER	LOC491099	491099	transcript	XM_548219.6	protein_coding	2	c.62+5283C>T		-1	-1	-1	-1	-1	-1	0
9	31156424	C	T	PASS	intron_variant	MODIFIER	LOC491099	491099	transcript	XM_022423171.1	protein_coding	2	c.62+5283C>T		-1	-1	-1	-1	-1	-1	0
9	31156424	C	T	PASS	intron_variant	MODIFIER	LOC491099	491099	transcript	XM_022423170.1	protein_coding	2	c.62+5283C>T		-1	-1	-1	-1	-1	-1	0
9	31156424	C	T	PASS	intron_variant	MODIFIER	LOC491099	491099	transcript	XR_002630010.1	pseudogene	2	n.631+5283C>T		-1	-1	-1	-1	-1	-1	0
9	31159088	A	G	PASS	intron_variant	MODIFIER	LOC491099	491099	transcript	XM_548219.6	protein_coding	2	c.62+7947A>G		-1	-1	-1	-1	-1	-1	0
9	31159088	A	G	PASS	intron_variant	MODIFIER	LOC491099	491099	transcript	XM_022423171.1	protein_coding	2	c.62+7947A>G		-1	-1	-1	-1	-1	-1	0
9	31159088	A	G	PASS	intron_variant	MODIFIER	LOC491099	491099	transcript	XM_022423170.1	protein_coding	2	c.62+7947A>G		-1	-1	-1	-1	-1	-1	0
9	31159088	A	G	PASS	intron_variant	MODIFIER	LOC491099	491099	transcript	XR_002630010.1	pseudogene	2	n.631+7947A>G		-1	-1	-1	-1	-1	-1	0
9	31160601	A	G	PASS	intron_variant	MODIFIER	LOC491099	491099	transcript	XM_548219.6	protein_coding	2	c.62+9460A>G		-1	-1	-1	-1	-1	-1	0
9	31160601	A	G	PASS	intron_variant	MODIFIER	LOC491099	491099	transcript	XM_022423171.1	protein_coding	2	c.62+9460A>G		-1	-1	-1	-1	-1	-1	0
9	31160601	A	G	PASS	intron_variant	MODIFIER	LOC491099	491099	transcript	XM_022423170.1	protein_coding	2	c.62+9460A>G		-1	-1	-1	-1	-1	-1	0
9	31160601	A	G	PASS	intron_variant	MODIFIER	LOC491099	491099	transcript	XR_002630010.1	pseudogene	2	n.631+9460A>G		-1	-1	-1	-1	-1	-1	0
9	31162696	C	T	PASS	intron_variant	MODIFIER	LOC491099	491099	transcript	XM_548219.6	protein_coding	2	c.62+11555C>T		-1	-1	-1	-1	-1	-1	0
9	31162696	C	T	PASS	intron_variant	MODIFIER	LOC491099	491099	transcript	XM_022423171.1	protein_coding	2	c.62+11555C>T		-1	-1	-1	-1	-1	-1	0
9	31162696	C	T	PASS	intron_variant	MODIFIER	LOC491099	491099	transcript	XM_022423170.1	protein_coding	2	c.62+11555C>T		-1	-1	-1	-1	-1	-1	0
9	31162696	C	T	PASS	intron_variant	MODIFIER	LOC491099	491099	transcript	XR_002630010.1	pseudogene	2	n.631+11555C>T		-1	-1	-1	-1	-1	-1	0
9	31162734	G	A	PASS	intron_variant	MODIFIER	LOC491099	491099	transcript	XM_548219.6	protein_coding	2	c.62+11593G>A		-1	-1	-1	-1	-1	-1	0
9	31162734	G	A	PASS	intron_variant	MODIFIER	LOC491099	491099	transcript	XM_022423171.1	protein_coding	2	c.62+11593G>A		-1	-1	-1	-1	-1	-1	0
9	31162734	G	A	PASS	intron_variant	MODIFIER	LOC491099	491099	transcript	XM_022423170.1	protein_coding	2	c.62+11593G>A		-1	-1	-1	-1	-1	-1	0
9	31162734	G	A	PASS	intron_variant	MODIFIER	LOC491099	491099	transcript	XR_002630010.1	pseudogene	2	n.631+11593G>A		-1	-1	-1	-1	-1	-1	0
9	31163366	G	A	PASS	intron_variant	MODIFIER	LOC491099	491099	transcript	XM_548219.6	protein_coding	2	c.62+12225G>A		-1	-1	-1	-1	-1	-1	0
9	31163366	G	A	PASS	intron_variant	MODIFIER	LOC491099	491099	transcript	XM_022423171.1	protein_coding	2	c.62+12225G>A		-1	-1	-1	-1	-1	-1	0
9	31163366	G	A	PASS	intron_variant	MODIFIER	LOC491099	491099	transcript	XM_022423170.1	protein_coding	2	c.62+12225G>A		-1	-1	-1	-1	-1	-1	0
9	31163366	G	A	PASS	intron_variant	MODIFIER	LOC491099	491099	transcript	XR_002630010.1	pseudogene	2	n.631+12225G>A		-1	-1	-1	-1	-1	-1	0
9	31163853	G	A	PASS	intron_variant	MODIFIER	LOC491099	491099	transcript	XM_548219.6	protein_coding	2	c.62+12712G>A		-1	-1	-1	-1	-1	-1	0
9	31163853	G	A	PASS	intron_variant	MODIFIER	LOC491099	491099	transcript	XM_022423171.1	protein_coding	2	c.62+12712G>A		-1	-1	-1	-1	-1	-1	0
9	31163853	G	A	PASS	intron_variant	MODIFIER	LOC491099	491099	transcript	XM_022423170.1	protein_coding	2	c.62+12712G>A		-1	-1	-1	-1	-1	-1	0
9	31163853	G	A	PASS	intron_variant	MODIFIER	LOC491099	491099	transcript	XR_002630010.1	pseudogene	2	n.631+12712G>A		-1	-1	-1	-1	-1	-1	0
9	31165242	G	A	PASS	intron_variant	MODIFIER	LOC491099	491099	transcript	XM_548219.6	protein_coding	2	c.62+14101G>A		-1	-1	-1	-1	-1	-1	0
9	31165242	G	A	PASS	intron_variant	MODIFIER	LOC491099	491099	transcript	XM_022423171.1	protein_coding	2	c.62+14101G>A		-1	-1	-1	-1	-1	-1	0
9	31165242	G	A	PASS	intron_variant	MODIFIER	LOC491099	491099	transcript	XM_022423170.1	protein_coding	2	c.62+14101G>A		-1	-1	-1	-1	-1	-1	0
9	31165242	G	A	PASS	intron_variant	MODIFIER	LOC491099	491099	transcript	XR_002630010.1	pseudogene	2	n.631+14101G>A		-1	-1	-1	-1	-1	-1	0
9	31165495	T	C	PASS	intron_variant	MODIFIER	LOC491099	491099	transcript	XM_548219.6	protein_coding	2	c.62+14354T>C		-1	-1	-1	-1	-1	-1	0
9	31165495	T	C	PASS	intron_variant	MODIFIER	LOC491099	491099	transcript	XM_022423171.1	protein_coding	2	c.62+14354T>C		-1	-1	-1	-1	-1	-1	0
9	31165495	T	C	PASS	intron_variant	MODIFIER	LOC491099	491099	transcript	XM_022423170.1	protein_coding	2	c.62+14354T>C		-1	-1	-1	-1	-1	-1	0
9	31165495	T	C	PASS	intron_variant	MODIFIER	LOC491099	491099	transcript	XR_002630010.1	pseudogene	2	n.631+14354T>C		-1	-1	-1	-1	-1	-1	0
9	31165632	TAAC	T	PASS	intron_variant	MODIFIER	LOC491099	491099	transcript	XM_548219.6	protein_coding	2	c.62+14492_62+14494delAAC		-1	-1	-1	-1	-1	-1	0
9	31165632	TAAC	T	PASS	intron_variant	MODIFIER	LOC491099	491099	transcript	XM_022423171.1	protein_coding	2	c.62+14492_62+14494delAAC		-1	-1	-1	-1	-1	-1	0
9	31165632	TAAC	T	PASS	intron_variant	MODIFIER	LOC491099	491099	transcript	XM_022423170.1	protein_coding	2	c.62+14492_62+14494delAAC		-1	-1	-1	-1	-1	-1	0
9	31165632	TAAC	T	PASS	intron_variant	MODIFIER	LOC491099	491099	transcript	XR_002630010.1	pseudogene	2	n.631+14492_631+14494delAAC		-1	-1	-1	-1	-1	-1	0
9	31166172	G	A	PASS	intron_variant	MODIFIER	LOC491099	491099	transcript	XM_548219.6	protein_coding	2	c.62+15031G>A		-1	-1	-1	-1	-1	-1	0
9	31166172	G	A	PASS	intron_variant	MODIFIER	LOC491099	491099	transcript	XM_022423171.1	protein_coding	2	c.62+15031G>A		-1	-1	-1	-1	-1	-1	0
9	31166172	G	A	PASS	intron_variant	MODIFIER	LOC491099	491099	transcript	XM_022423170.1	protein_coding	2	c.62+15031G>A		-1	-1	-1	-1	-1	-1	0
9	31166172	G	A	PASS	intron_variant	MODIFIER	LOC491099	491099	transcript	XR_002630010.1	pseudogene	2	n.631+15031G>A		-1	-1	-1	-1	-1	-1	0
9	31166918	C	T	PASS	intron_variant	MODIFIER	LOC491099	491099	transcript	XM_548219.6	protein_coding	2	c.62+15777C>T		-1	-1	-1	-1	-1	-1	0
9	31166918	C	T	PASS	intron_variant	MODIFIER	LOC491099	491099	transcript	XM_022423171.1	protein_coding	2	c.62+15777C>T		-1	-1	-1	-1	-1	-1	0
9	31166918	C	T	PASS	intron_variant	MODIFIER	LOC491099	491099	transcript	XM_022423170.1	protein_coding	2	c.62+15777C>T		-1	-1	-1	-1	-1	-1	0
9	31166918	C	T	PASS	intron_variant	MODIFIER	LOC491099	491099	transcript	XR_002630010.1	pseudogene	2	n.631+15777C>T		-1	-1	-1	-1	-1	-1	0
9	31168635	C	T	PASS	intron_variant	MODIFIER	LOC491099	491099	transcript	XM_548219.6	protein_coding	2	c.62+17494C>T		-1	-1	-1	-1	-1	-1	0
9	31168635	C	T	PASS	intron_variant	MODIFIER	LOC491099	491099	transcript	XM_022423171.1	protein_coding	2	c.62+17494C>T		-1	-1	-1	-1	-1	-1	0
9	31168635	C	T	PASS	intron_variant	MODIFIER	LOC491099	491099	transcript	XM_022423170.1	protein_coding	2	c.62+17494C>T		-1	-1	-1	-1	-1	-1	0
9	31168635	C	T	PASS	intron_variant	MODIFIER	LOC491099	491099	transcript	XR_002630010.1	pseudogene	2	n.631+17494C>T		-1	-1	-1	-1	-1	-1	0
9	31168657	C	T	PASS	intron_variant	MODIFIER	LOC491099	491099	transcript	XM_548219.6	protein_coding	2	c.62+17516C>T		-1	-1	-1	-1	-1	-1	0
9	31168657	C	T	PASS	intron_variant	MODIFIER	LOC491099	491099	transcript	XM_022423171.1	protein_coding	2	c.62+17516C>T		-1	-1	-1	-1	-1	-1	0
[truncated: 16,822 more rows]

## Sheet: private heterozygous varian
Table S3. Private variants in the sequenced Basset Hound with dystrophical epidermolysis bullosa (DEB). Private variants were obtained by filtering all variants that were present at least once in 73 control genomes. This resulted in 18820 homozygous and 80057 heterozygous private variants for the affected dog. Please note that variants are listed multiple times, if they have predicted effects on …
#CHROM	POS	REF	ALT	FILTER	EFFECT	IMPACT	GENE	GENEID	FEATURE	FEATUREID	BIOTYPE	RANK	HGVS_C	HGVS_P	CDNA_POS	CDNA_LEN	CDS_POS	CDS_LEN	AA_POS	AA_LEN	DISTANCE	ERRORS
1	4406	A	T	PASS	intergenic_region	MODIFIER	CHR_START-ENPP1	CHR_START-100856150	intergenic_region	CHR_START-100856150		-1	n.4406A>T		-1	-1	-1	-1	-1	-1	0
1	4418	G	T	PASS	intergenic_region	MODIFIER	CHR_START-ENPP1	CHR_START-100856150	intergenic_region	CHR_START-100856150		-1	n.4418G>T		-1	-1	-1	-1	-1	-1	0
1	17634	C	A	QD2	intergenic_region	MODIFIER	CHR_START-ENPP1	CHR_START-100856150	intergenic_region	CHR_START-100856150		-1	n.17634C>A		-1	-1	-1	-1	-1	-1	0
1	1157550	C	T	PASS	intron_variant	MODIFIER	ATP9B	483926	transcript	XM_014120554.2	protein_coding	21	c.2472+282G>A		-1	-1	-1	-1	-1	-1	0
1	1157550	C	T	PASS	intron_variant	MODIFIER	ATP9B	483926	transcript	XM_022408728.1	protein_coding	18	c.1929+282G>A		-1	-1	-1	-1	-1	-1	0
1	1157550	C	T	PASS	intron_variant	MODIFIER	ATP9B	483926	transcript	XM_014120585.2	protein_coding	21	c.2319+282G>A		-1	-1	-1	-1	-1	-1	0
1	1157550	C	T	PASS	intron_variant	MODIFIER	ATP9B	483926	transcript	XM_014120564.2	protein_coding	19	c.2361+282G>A		-1	-1	-1	-1	-1	-1	0
1	1157550	C	T	PASS	intron_variant	MODIFIER	ATP9B	483926	transcript	XM_014120608.2	protein_coding	19	c.2319+282G>A		-1	-1	-1	-1	-1	-1	0
1	1157550	C	T	PASS	intron_variant	MODIFIER	ATP9B	483926	transcript	XM_022408644.1	protein_coding	20	c.2391+282G>A		-1	-1	-1	-1	-1	-1	0
1	1157550	C	T	PASS	intron_variant	MODIFIER	ATP9B	483926	transcript	XM_022408616.1	protein_coding	21	c.2469+282G>A		-1	-1	-1	-1	-1	-1	0
1	1288046	G	GCC	PASS	intron_variant	MODIFIER	ATP9B	483926	transcript	XM_014120554.2	protein_coding	7	c.776-4350_776-4349insGG		-1	-1	-1	-1	-1	-1	0
1	1288046	G	GCC	PASS	intron_variant	MODIFIER	ATP9B	483926	transcript	XM_022408728.1	protein_coding	4	c.233-4350_233-4349insGG		-1	-1	-1	-1	-1	-1	0
1	1288046	G	GCC	PASS	intron_variant	MODIFIER	ATP9B	483926	transcript	XM_014120585.2	protein_coding	7	c.623-4350_623-4349insGG		-1	-1	-1	-1	-1	-1	0
1	1288046	G	GCC	PASS	intron_variant	MODIFIER	ATP9B	483926	transcript	XM_014120564.2	protein_coding	5	c.665-4350_665-4349insGG		-1	-1	-1	-1	-1	-1	0
1	1288046	G	GCC	PASS	intron_variant	MODIFIER	ATP9B	483926	transcript	XM_014120608.2	protein_coding	7	c.776-4350_776-4349insGG		-1	-1	-1	-1	-1	-1	0
1	1288046	G	GCC	PASS	intron_variant	MODIFIER	ATP9B	483926	transcript	XM_022408644.1	protein_coding	7	c.776-4350_776-4349insGG		-1	-1	-1	-1	-1	-1	0
1	1288046	G	GCC	PASS	intron_variant	MODIFIER	ATP9B	483926	transcript	XM_022408616.1	protein_coding	7	c.776-4350_776-4349insGG		-1	-1	-1	-1	-1	-1	0
1	1288049	A	ACGACCC	PASS	intron_variant	MODIFIER	ATP9B	483926	transcript	XM_014120554.2	protein_coding	7	c.776-4353_776-4352insGGGTCG		-1	-1	-1	-1	-1	-1	0
1	1288049	A	ACGACCC	PASS	intron_variant	MODIFIER	ATP9B	483926	transcript	XM_022408728.1	protein_coding	4	c.233-4353_233-4352insGGGTCG		-1	-1	-1	-1	-1	-1	0
1	1288049	A	ACGACCC	PASS	intron_variant	MODIFIER	ATP9B	483926	transcript	XM_014120585.2	protein_coding	7	c.623-4353_623-4352insGGGTCG		-1	-1	-1	-1	-1	-1	0
1	1288049	A	ACGACCC	PASS	intron_variant	MODIFIER	ATP9B	483926	transcript	XM_014120564.2	protein_coding	5	c.665-4353_665-4352insGGGTCG		-1	-1	-1	-1	-1	-1	0
1	1288049	A	ACGACCC	PASS	intron_variant	MODIFIER	ATP9B	483926	transcript	XM_014120608.2	protein_coding	7	c.776-4353_776-4352insGGGTCG		-1	-1	-1	-1	-1	-1	0
1	1288049	A	ACGACCC	PASS	intron_variant	MODIFIER	ATP9B	483926	transcript	XM_022408644.1	protein_coding	7	c.776-4353_776-4352insGGGTCG		-1	-1	-1	-1	-1	-1	0
1	1288049	A	ACGACCC	PASS	intron_variant	MODIFIER	ATP9B	483926	transcript	XM_022408616.1	protein_coding	7	c.776-4353_776-4352insGGGTCG		-1	-1	-1	-1	-1	-1	0
1	1288051	G	GCAATTGCACTGTTGGGGATTTACCCCAAAGATACAAATGCAATGAAAC	PASS	intron_variant	MODIFIER	ATP9B	483926	transcript	XM_014120554.2	protein_coding	7	c.776-4355_776-4354insGTTTCATTGCATTTGTATCTTTGGGGTAAATCCCCAACAGTGCAATTG		-1	-1	-1	-1	-1	-1	0
1	1288051	G	GCAATTGCACTGTTGGGGATTTACCCCAAAGATACAAATGCAATGAAAC	PASS	intron_variant	MODIFIER	ATP9B	483926	transcript	XM_022408728.1	protein_coding	4	c.233-4355_233-4354insGTTTCATTGCATTTGTATCTTTGGGGTAAATCCCCAACAGTGCAATTG		-1	-1	-1	-1	-1	-1	0
1	1288051	G	GCAATTGCACTGTTGGGGATTTACCCCAAAGATACAAATGCAATGAAAC	PASS	intron_variant	MODIFIER	ATP9B	483926	transcript	XM_014120585.2	protein_coding	7	c.623-4355_623-4354insGTTTCATTGCATTTGTATCTTTGGGGTAAATCCCCAACAGTGCAATTG		-1	-1	-1	-1	-1	-1	0
1	1288051	G	GCAATTGCACTGTTGGGGATTTACCCCAAAGATACAAATGCAATGAAAC	PASS	intron_variant	MODIFIER	ATP9B	483926	transcript	XM_014120564.2	protein_coding	5	c.665-4355_665-4354insGTTTCATTGCATTTGTATCTTTGGGGTAAATCCCCAACAGTGCAATTG		-1	-1	-1	-1	-1	-1	0
1	1288051	G	GCAATTGCACTGTTGGGGATTTACCCCAAAGATACAAATGCAATGAAAC	PASS	intron_variant	MODIFIER	ATP9B	483926	transcript	XM_014120608.2	protein_coding	7	c.776-4355_776-4354insGTTTCATTGCATTTGTATCTTTGGGGTAAATCCCCAACAGTGCAATTG		-1	-1	-1	-1	-1	-1	0
1	1288051	G	GCAATTGCACTGTTGGGGATTTACCCCAAAGATACAAATGCAATGAAAC	PASS	intron_variant	MODIFIER	ATP9B	483926	transcript	XM_022408644.1	protein_coding	7	c.776-4355_776-4354insGTTTCATTGCATTTGTATCTTTGGGGTAAATCCCCAACAGTGCAATTG		-1	-1	-1	-1	-1	-1	0
1	1288051	G	GCAATTGCACTGTTGGGGATTTACCCCAAAGATACAAATGCAATGAAAC	PASS	intron_variant	MODIFIER	ATP9B	483926	transcript	XM_022408616.1	protein_coding	7	c.776-4355_776-4354insGTTTCATTGCATTTGTATCTTTGGGGTAAATCCCCAACAGTGCAATTG		-1	-1	-1	-1	-1	-1	0
1	3277987	T	G	PASS	splice_region_variant&intron_variant	LOW	ZNF516	483930	transcript	XM_005615300.3	protein_coding	1	c.-360+3T>G		-1	-1	-1	-1	-1	-1	0
1	3277987	T	G	PASS	splice_region_variant&intron_variant	LOW	ZNF516	483930	transcript	XM_022410116.1	protein_coding	1	c.-175+3T>G		-1	-1	-1	-1	-1	-1	0
1	3277987	T	G	PASS	splice_region_variant&intron_variant	LOW	ZNF516	483930	transcript	XM_005615305.3	protein_coding	1	c.-360+3T>G		-1	-1	-1	-1	-1	-1	0
1	3277987	T	G	PASS	splice_region_variant&intron_variant	LOW	ZNF516	483930	transcript	XM_022410053.1	protein_coding	1	c.-463+3T>G		-1	-1	-1	-1	-1	-1	0
1	3277987	T	G	PASS	splice_region_variant&intron_variant	LOW	ZNF516	483930	transcript	XM_022410204.1	protein_coding	1	c.-360+3T>G		-1	-1	-1	-1	-1	-1	0
1	3277987	T	G	PASS	splice_region_variant&intron_variant	LOW	ZNF516	483930	transcript	XM_022410239.1	protein_coding	1	c.-360+3T>G		-1	-1	-1	-1	-1	-1	0
1	3277987	T	G	PASS	upstream_gene_variant	MODIFIER	C1H18orf65	106558742	transcript	XM_022404556.1	protein_coding	-1	c.-3659A>C		-1	-1	-1	-1	-1	-1	3659	WARNING_TRANSCRIPT_MULTIPLE_STOP_CODONS
1	3277987	T	G	PASS	upstream_gene_variant	MODIFIER	ZNF516	483930	transcript	XM_005615304.2	protein_coding	-1	c.-46521T>G		-1	-1	-1	-1	-1	-1	1371
1	3277987	T	G	PASS	upstream_gene_variant	MODIFIER	ZNF516	483930	transcript	XM_022410136.1	protein_coding	-1	c.-46521T>G		-1	-1	-1	-1	-1	-1	1418
1	3277987	T	G	PASS	intron_variant	MODIFIER	ZNF516	483930	transcript	XM_005615302.3	protein_coding	1	c.-175+2591T>G		-1	-1	-1	-1	-1	-1	0
1	3277987	T	G	PASS	intron_variant	MODIFIER	ZNF516	483930	transcript	XM_014121066.2	protein_coding	1	c.-360+2591T>G		-1	-1	-1	-1	-1	-1	0
1	3277987	T	G	PASS	intron_variant	MODIFIER	ZNF516	483930	transcript	XM_022410173.1	protein_coding	1	c.-175+252T>G		-1	-1	-1	-1	-1	-1	0
1	3773290	T	G	QD2	intergenic_region	MODIFIER	LOC102157008-LOC111092546	102157008-111092546	intergenic_region	102157008-111092546		-1	n.3773290T>G		-1	-1	-1	-1	-1	-1	0
1	4145041	T	A	PASS	intergenic_region	MODIFIER	LOC111092546-TSHZ1	111092546-102152070	intergenic_region	111092546-102152070		-1	n.4145041T>A		-1	-1	-1	-1	-1	-1	0
1	4772182	A	T	QD2	intron_variant	MODIFIER	ZNF407	476164	transcript	XM_533370.6	protein_coding	3	c.4802+57411T>A		-1	-1	-1	-1	-1	-1	0
1	4772182	A	T	QD2	intron_variant	MODIFIER	ZNF407	476164	transcript	XM_005615309.3	protein_coding	3	c.4802+57411T>A		-1	-1	-1	-1	-1	-1	0
1	4772182	A	T	QD2	intron_variant	MODIFIER	ZNF407	476164	transcript	XM_022410612.1	protein_coding	3	c.4802+57411T>A		-1	-1	-1	-1	-1	-1	0
1	4772182	A	T	QD2	intron_variant	MODIFIER	ZNF407	476164	transcript	XM_005615311.3	protein_coding	3	c.4802+57411T>A		-1	-1	-1	-1	-1	-1	0
1	4772182	A	T	QD2	intron_variant	MODIFIER	ZNF407	476164	transcript	XM_022410708.1	protein_coding	3	c.4802+57411T>A		-1	-1	-1	-1	-1	-1	0
1	4772182	A	T	QD2	intron_variant	MODIFIER	ZNF407	476164	transcript	XM_022410737.1	protein_coding	3	c.4802+57411T>A		-1	-1	-1	-1	-1	-1	0
1	4772182	A	T	QD2	intron_variant	MODIFIER	ZNF407	476164	transcript	XM_005615312.3	protein_coding	3	c.4802+57411T>A		-1	-1	-1	-1	-1	-1	0
1	5950705	C	T	PASS	intergenic_region	MODIFIER	LOC100685303-LOC111092976	100685303-111092976	intergenic_region	100685303-111092976		-1	n.5950705C>T		-1	-1	-1	-1	-1	-1	0
1	6749905	AG	A	PASS	intergenic_region	MODIFIER	LOC100856140-LOC100685678	100856140-100685678	intergenic_region	100856140-100685678		-1	n.6749906delG		-1	-1	-1	-1	-1	-1	0
1	6749910	GAAAGAAAGAAAGAAAGAAA	G	PASS	intergenic_region	MODIFIER	LOC100856140-LOC100685678	100856140-100685678	intergenic_region	100856140-100685678		-1	n.6749911_6749929delAAAGAAAGAAAGAAAGAAA		-1	-1	-1	-1	-1	-1	0
1	6956587	C	T	QD2	upstream_gene_variant	MODIFIER	LOC111090553	111090553	transcript	111090553	pseudogene	-1	n.-4551C>T		-1	-1	-1	-1	-1	-1	4551
1	6956587	C	T	QD2	intergenic_region	MODIFIER	LOC100685755-LOC111090553	100685755-111090553	intergenic_region	100685755-111090553		-1	n.6956587C>T		-1	-1	-1	-1	-1	-1	0
1	8038327	TG	T	PASS	intergenic_region	MODIFIER	LOC102152782-LOC100856283	102152782-100856283	intergenic_region	102152782-100856283		-1	n.8038328delG		-1	-1	-1	-1	-1	-1	0
1	9018470	C	CT	PASS	intergenic_region	MODIFIER	DOK6-CCDC102B	476173-483942	intergenic_region	476173-483942		-1	n.9018470_9018471insT		-1	-1	-1	-1	-1	-1	0
1	9136742	T	C	PASS	intergenic_region	MODIFIER	DOK6-CCDC102B	476173-483942	intergenic_region	476173-483942		-1	n.9136742T>C		-1	-1	-1	-1	-1	-1	0
1	9347063	AAGG	A	PASS	intergenic_region	MODIFIER	CCDC102B-TMX3	483942-476176	intergenic_region	483942-476176		-1	n.9347064_9347066delAGG		-1	-1	-1	-1	-1	-1	0
1	9347068	T	TAC	PASS	intergenic_region	MODIFIER	CCDC102B-TMX3	483942-476176	intergenic_region	483942-476176		-1	n.9347068_9347069insAC		-1	-1	-1	-1	-1	-1	0
1	9660990	A	G	PASS	intergenic_region	MODIFIER	TMX3-LOC111090592	476176-111090592	intergenic_region	476176-111090592		-1	n.9660990A>G		-1	-1	-1	-1	-1	-1	0
1	9661009	T	A	PASS	intergenic_region	MODIFIER	TMX3-LOC111090592	476176-111090592	intergenic_region	476176-111090592		-1	n.9661009T>A		-1	-1	-1	-1	-1	-1	0
1	9807958	C	T	PASS	intergenic_region	MODIFIER	TMX3-LOC111090592	476176-111090592	intergenic_region	476176-111090592		-1	n.9807958C>T		-1	-1	-1	-1	-1	-1	0
1	10138700	T	TTTTTTTTTTTTTTTTTTTTTTTTTTTG	PASS	intergenic_region	MODIFIER	LOC483943-DSEL	483943-483944	intergenic_region	483943-483944		-1	n.10138700_10138701insTTTTTTTTTTTTTTTTTTTTTTTTTTG		-1	-1	-1	-1	-1	-1	0
1	10138701	GTC	G	PASS	intergenic_region	MODIFIER	LOC483943-DSEL	483943-483944	intergenic_region	483943-483944		-1	n.10138702_10138703delTC		-1	-1	-1	-1	-1	-1	0
1	11094263	A	AAAT	PASS	intron_variant	MODIFIER	CDH19	483948	transcript	XM_541068.6	protein_coding	1	c.-107-3356_-107-3355insAAT		-1	-1	-1	-1	-1	-1	0
1	11094263	A	AAAT	PASS	intron_variant	MODIFIER	CDH19	483948	transcript	XM_005615336.3	protein_coding	1	c.-107-3356_-107-3355insAAT		-1	-1	-1	-1	-1	-1	0
1	11094263	A	AAAT	PASS	intron_variant	MODIFIER	CDH19	483948	transcript	XM_022413663.1	protein_coding	1	c.-107-3356_-107-3355insAAT		-1	-1	-1	-1	-1	-1	0
1	11290012	G	A	PASS	intron_variant	MODIFIER	LOC102154255	102154255	transcript	XR_002622159.1	pseudogene	1	n.176+9739C>T		-1	-1	-1	-1	-1	-1	0
1	11290012	G	A	PASS	intron_variant	MODIFIER	LOC102154255	102154255	transcript	XR_002622172.1	pseudogene	1	n.176+9739C>T		-1	-1	-1	-1	-1	-1	0
1	11290012	G	A	PASS	intron_variant	MODIFIER	LOC102154255	102154255	transcript	XR_291199.2	pseudogene	1	n.176+9739C>T		-1	-1	-1	-1	-1	-1	0
1	13334859	GC	G	PASS	downstream_gene_variant	MODIFIER	SERPINB7	483952	transcript	XM_005615338.2	protein_coding	-1	c.*1977delG		-1	-1	-1	-1	-1	-1	1207
1	13334859	GC	G	PASS	downstream_gene_variant	MODIFIER	SERPINB7	483952	transcript	XM_541072.5	protein_coding	-1	c.*1977delG		-1	-1	-1	-1	-1	-1	1207
1	13334859	GC	G	PASS	downstream_gene_variant	MODIFIER	SERPINB7	483952	transcript	XM_022414320.1	protein_coding	-1	c.*1977delG		-1	-1	-1	-1	-1	-1	1207
1	13334859	GC	G	PASS	intergenic_region	MODIFIER	LOC111093874-SERPINB7	111093874-483952	intergenic_region	111093874-483952		-1	n.13334860delC		-1	-1	-1	-1	-1	-1	0
1	13334877	GC	G	PASS	downstream_gene_variant	MODIFIER	SERPINB7	483952	transcript	XM_005615338.2	protein_coding	-1	c.*1959delG		-1	-1	-1	-1	-1	-1	1189
1	13334877	GC	G	PASS	downstream_gene_variant	MODIFIER	SERPINB7	483952	transcript	XM_541072.5	protein_coding	-1	c.*1959delG		-1	-1	-1	-1	-1	-1	1189
1	13334877	GC	G	PASS	downstream_gene_variant	MODIFIER	SERPINB7	483952	transcript	XM_022414320.1	protein_coding	-1	c.*1959delG		-1	-1	-1	-1	-1	-1	1189
1	13334877	GC	G	PASS	intergenic_region	MODIFIER	LOC111093874-SERPINB7	111093874-483952	intergenic_region	111093874-483952		-1	n.13334878delC		-1	-1	-1	-1	-1	-1	0
1	13340703	C	T	PASS	intron_variant	MODIFIER	SERPINB7	483952	transcript	XM_005615338.2	protein_coding	5	c.455-179G>A		-1	-1	-1	-1	-1	-1	0
1	13340703	C	T	PASS	intron_variant	MODIFIER	SERPINB7	483952	transcript	XM_541072.5	protein_coding	5	c.455-179G>A		-1	-1	-1	-1	-1	-1	0
1	13340703	C	T	PASS	intron_variant	MODIFIER	SERPINB7	483952	transcript	XM_022414320.1	protein_coding	6	c.455-179G>A		-1	-1	-1	-1	-1	-1	0
1	13343118	G	A	PASS	intron_variant	MODIFIER	SERPINB7	483952	transcript	XM_005615338.2	protein_coding	5	c.454+1391C>T		-1	-1	-1	-1	-1	-1	0
1	13343118	G	A	PASS	intron_variant	MODIFIER	SERPINB7	483952	transcript	XM_541072.5	protein_coding	5	c.454+1391C>T		-1	-1	-1	-1	-1	-1	0
1	13343118	G	A	PASS	intron_variant	MODIFIER	SERPINB7	483952	transcript	XM_022414320.1	protein_coding	6	c.454+1391C>T		-1	-1	-1	-1	-1	-1	0
1	13346267	G	A	PASS	intron_variant	MODIFIER	SERPINB7	483952	transcript	XM_005615338.2	protein_coding	4	c.337-1641C>T		-1	-1	-1	-1	-1	-1	0
1	13346267	G	A	PASS	intron_variant	MODIFIER	SERPINB7	483952	transcript	XM_541072.5	protein_coding	4	c.337-1641C>T		-1	-1	-1	-1	-1	-1	0
1	13346267	G	A	PASS	intron_variant	MODIFIER	SERPINB7	483952	transcript	XM_022414320.1	protein_coding	5	c.337-1641C>T		-1	-1	-1	-1	-1	-1	0
1	13346459	T	C	PASS	intron_variant	MODIFIER	SERPINB7	483952	transcript	XM_005615338.2	protein_coding	4	c.337-1833A>G		-1	-1	-1	-1	-1	-1	0
1	13346459	T	C	PASS	intron_variant	MODIFIER	SERPINB7	483952	transcript	XM_541072.5	protein_coding	4	c.337-1833A>G		-1	-1	-1	-1	-1	-1	0
1	13346459	T	C	PASS	intron_variant	MODIFIER	SERPINB7	483952	transcript	XM_022414320.1	protein_coding	5	c.337-1833A>G		-1	-1	-1	-1	-1	-1	0
1	13348696	T	C	PASS	intron_variant	MODIFIER	SERPINB7	483952	transcript	XM_005615338.2	protein_coding	4	c.336+3251A>G		-1	-1	-1	-1	-1	-1	0
1	13348696	T	C	PASS	intron_variant	MODIFIER	SERPINB7	483952	transcript	XM_541072.5	protein_coding	4	c.336+3251A>G		-1	-1	-1	-1	-1	-1	0
1	13348696	T	C	PASS	intron_variant	MODIFIER	SERPINB7	483952	transcript	XM_022414320.1	protein_coding	5	c.336+3251A>G		-1	-1	-1	-1	-1	-1	0
1	13350063	C	T	PASS	intron_variant	MODIFIER	SERPINB7	483952	transcript	XM_005615338.2	protein_coding	4	c.336+1884G>A		-1	-1	-1	-1	-1	-1	0
1	13350063	C	T	PASS	intron_variant	MODIFIER	SERPINB7	483952	transcript	XM_541072.5	protein_coding	4	c.336+1884G>A		-1	-1	-1	-1	-1	-1	0
1	13350063	C	T	PASS	intron_variant	MODIFIER	SERPINB7	483952	transcript	XM_022414320.1	protein_coding	5	c.336+1884G>A		-1	-1	-1	-1	-1	-1	0
1	13350464	T	C	PASS	intron_variant	MODIFIER	SERPINB7	483952	transcript	XM_005615338.2	protein_coding	4	c.336+1483A>G		-1	-1	-1	-1	-1	-1	0
1	13350464	T	C	PASS	intron_variant	MODIFIER	SERPINB7	483952	transcript	XM_541072.5	protein_coding	4	c.336+1483A>G		-1	-1	-1	-1	-1	-1	0
1	13350464	T	C	PASS	intron_variant	MODIFIER	SERPINB7	483952	transcript	XM_022414320.1	protein_coding	5	c.336+1483A>G		-1	-1	-1	-1	-1	-1	0
1	13358713	C	CGCT	PASS	upstream_gene_variant	MODIFIER	LOC111093968	111093968	transcript	XR_002622791.1	pseudogene	-1	n.-4738_-4737insGCT		-1	-1	-1	-1	-1	-1	4737
1	13358713	C	CGCT	PASS	upstream_gene_variant	MODIFIER	LOC111093968	111093968	transcript	XR_002622802.1	pseudogene	-1	n.-4059_-4058insGCT		-1	-1	-1	-1	-1	-1	4058
1	13358713	C	CGCT	PASS	upstream_gene_variant	MODIFIER	LOC111093968	111093968	transcript	XR_002622816.1	pseudogene	-1	n.-4738_-4737insGCT		-1	-1	-1	-1	-1	-1	4737
1	13358713	C	CGCT	PASS	intron_variant	MODIFIER	SERPINB7	483952	transcript	XM_005615338.2	protein_coding	1	c.-18-589_-18-588insAGC		-1	-1	-1	-1	-1	-1	0
1	13358713	C	CGCT	PASS	intron_variant	MODIFIER	SERPINB7	483952	transcript	XM_541072.5	protein_coding	1	c.-18-589_-18-588insAGC		-1	-1	-1	-1	-1	-1	0
1	13358713	C	CGCT	PASS	intron_variant	MODIFIER	SERPINB7	483952	transcript	XM_022414320.1	protein_coding	2	c.-18-589_-18-588insAGC		-1	-1	-1	-1	-1	-1	0
1	13377802	TAAA	T	PASS	downstream_gene_variant	MODIFIER	LOC111093968	111093968	transcript	XR_002622791.1	pseudogene	-1	n.*2429_*2431delAAA		-1	-1	-1	-1	-1	-1	2429
1	13377802	TAAA	T	PASS	downstream_gene_variant	MODIFIER	LOC111093968	111093968	transcript	XR_002622802.1	pseudogene	-1	n.*2429_*2431delAAA		-1	-1	-1	-1	-1	-1	2429
1	13377802	TAAA	T	PASS	downstream_gene_variant	MODIFIER	LOC111093968	111093968	transcript	XR_002622816.1	pseudogene	-1	n.*4521_*4523delAAA		-1	-1	-1	-1	-1	-1	4521
1	13377802	TAAA	T	PASS	intron_variant	MODIFIER	SERPINB7	483952	transcript	XM_005615338.2	protein_coding	1	c.-19+14708_-19+14710delTTT		-1	-1	-1	-1	-1	-1	0
1	13397964	T	G	PASS	intron_variant	MODIFIER	SERPINB11	483953	transcript	XR_002623050.1	pseudogene	1	n.18+354A>C		-1	-1	-1	-1	-1	-1	0
1	13397964	T	G	PASS	intron_variant	MODIFIER	SERPINB11	483953	transcript	XR_002623044.1	pseudogene	9	n.1635-771A>C		-1	-1	-1	-1	-1	-1	0
1	13397964	T	G	PASS	intron_variant	MODIFIER	SERPINB11	483953	transcript	XR_002622879.1	pseudogene	11	n.1822-771A>C		-1	-1	-1	-1	-1	-1	0
1	13397964	T	G	PASS	intron_variant	MODIFIER	SERPINB11	483953	transcript	XR_002622847.1	pseudogene	12	n.2380-771A>C		-1	-1	-1	-1	-1	-1	0
1	13397964	T	G	PASS	intron_variant	MODIFIER	SERPINB11	483953	transcript	XR_002622866.1	pseudogene	12	n.2260-771A>C		-1	-1	-1	-1	-1	-1	0
1	13397964	T	G	PASS	intron_variant	MODIFIER	SERPINB11	483953	transcript	XR_002622832.1	pseudogene	12	n.2193-771A>C		-1	-1	-1	-1	-1	-1	0
1	13397964	T	G	PASS	intron_variant	MODIFIER	SERPINB11	483953	transcript	XR_002622910.1	pseudogene	12	n.2196-1105A>C		-1	-1	-1	-1	-1	-1	0
1	13397964	T	G	PASS	intron_variant	MODIFIER	SERPINB11	483953	transcript	XR_002622935.1	pseudogene	12	n.2193-1105A>C		-1	-1	-1	-1	-1	-1	0
1	13397964	T	G	PASS	intron_variant	MODIFIER	SERPINB11	483953	transcript	XR_002622952.1	pseudogene	12	n.2193-771A>C		-1	-1	-1	-1	-1	-1	0
1	13397964	T	G	PASS	intron_variant	MODIFIER	SERPINB11	483953	transcript	XR_002622978.1	pseudogene	11	n.2079-771A>C		-1	-1	-1	-1	-1	-1	0
1	13397964	T	G	PASS	intron_variant	MODIFIER	SERPINB11	483953	transcript	XR_002623008.1	pseudogene	12	n.2146-771A>C		-1	-1	-1	-1	-1	-1	0
1	13397964	T	G	PASS	intron_variant	MODIFIER	SERPINB11	483953	transcript	XR_002623036.1	pseudogene	10	n.2008-771A>C		-1	-1	-1	-1	-1	-1	0
1	13397964	T	G	PASS	intron_variant	MODIFIER	SERPINB11	483953	transcript	XR_002623048.1	pseudogene	10	n.1894-771A>C		-1	-1	-1	-1	-1	-1	0
1	13397964	T	G	PASS	intron_variant	MODIFIER	SERPINB11	483953	transcript	XR_002622837.1	pseudogene	13	n.2253-771A>C		-1	-1	-1	-1	-1	-1	0
1	13397964	T	G	PASS	intron_variant	MODIFIER	SERPINB11	483953	transcript	XR_002622979.1	pseudogene	12	n.2317-771A>C		-1	-1	-1	-1	-1	-1	0
1	13397964	T	G	PASS	intron_variant	MODIFIER	SERPINB11	483953	transcript	XR_002622993.1	pseudogene	13	n.2384-771A>C		-1	-1	-1	-1	-1	-1	0
1	13397965	A	G	PASS	intron_variant	MODIFIER	SERPINB11	483953	transcript	XR_002623050.1	pseudogene	1	n.18+353T>C		-1	-1	-1	-1	-1	-1	0
1	13397965	A	G	PASS	intron_variant	MODIFIER	SERPINB11	483953	transcript	XR_002623044.1	pseudogene	9	n.1635-772T>C		-1	-1	-1	-1	-1	-1	0
1	13397965	A	G	PASS	intron_variant	MODIFIER	SERPINB11	483953	transcript	XR_002622879.1	pseudogene	11	n.1822-772T>C		-1	-1	-1	-1	-1	-1	0
1	13397965	A	G	PASS	intron_variant	MODIFIER	SERPINB11	483953	transcript	XR_002622847.1	pseudogene	12	n.2380-772T>C		-1	-1	-1	-1	-1	-1	0
1	13397965	A	G	PASS	intron_variant	MODIFIER	SERPINB11	483953	transcript	XR_002622866.1	pseudogene	12	n.2260-772T>C		-1	-1	-1	-1	-1	-1	0
1	13397965	A	G	PASS	intron_variant	MODIFIER	SERPINB11	483953	transcript	XR_002622832.1	pseudogene	12	n.2193-772T>C		-1	-1	-1	-1	-1	-1	0
1	13397965	A	G	PASS	intron_variant	MODIFIER	SERPINB11	483953	transcript	XR_002622910.1	pseudogene	12	n.2196-1106T>C		-1	-1	-1	-1	-1	-1	0
1	13397965	A	G	PASS	intron_variant	MODIFIER	SERPINB11	483953	transcript	XR_002622935.1	pseudogene	12	n.2193-1106T>C		-1	-1	-1	-1	-1	-1	0
1	13397965	A	G	PASS	intron_variant	MODIFIER	SERPINB11	483953	transcript	XR_002622952.1	pseudogene	12	n.2193-772T>C		-1	-1	-1	-1	-1	-1	0
1	13397965	A	G	PASS	intron_variant	MODIFIER	SERPINB11	483953	transcript	XR_002622978.1	pseudogene	11	n.2079-772T>C		-1	-1	-1	-1	-1	-1	0
1	13397965	A	G	PASS	intron_variant	MODIFIER	SERPINB11	483953	transcript	XR_002623008.1	pseudogene	12	n.2146-772T>C		-1	-1	-1	-1	-1	-1	0
1	13397965	A	G	PASS	intron_variant	MODIFIER	SERPINB11	483953	transcript	XR_002623036.1	pseudogene	10	n.2008-772T>C		-1	-1	-1	-1	-1	-1	0
1	13397965	A	G	PASS	intron_variant	MODIFIER	SERPINB11	483953	transcript	XR_002623048.1	pseudogene	10	n.1894-772T>C		-1	-1	-1	-1	-1	-1	0
1	13397965	A	G	PASS	intron_variant	MODIFIER	SERPINB11	483953	transcript	XR_002622837.1	pseudogene	13	n.2253-772T>C		-1	-1	-1	-1	-1	-1	0
1	13397965	A	G	PASS	intron_variant	MODIFIER	SERPINB11	483953	transcript	XR_002622979.1	pseudogene	12	n.2317-772T>C		-1	-1	-1	-1	-1	-1	0
1	13397965	A	G	PASS	intron_variant	MODIFIER	SERPINB11	483953	transcript	XR_002622993.1	pseudogene	13	n.2384-772T>C		-1	-1	-1	-1	-1	-1	0
1	13397980	A	T	PASS	intron_variant	MODIFIER	SERPINB11	483953	transcript	XR_002623050.1	pseudogene	1	n.18+338T>A		-1	-1	-1	-1	-1	-1	0
1	13397980	A	T	PASS	intron_variant	MODIFIER	SERPINB11	483953	transcript	XR_002623044.1	pseudogene	9	n.1635-787T>A		-1	-1	-1	-1	-1	-1	0
1	13397980	A	T	PASS	intron_variant	MODIFIER	SERPINB11	483953	transcript	XR_002622879.1	pseudogene	11	n.1822-787T>A		-1	-1	-1	-1	-1	-1	0
1	13397980	A	T	PASS	intron_variant	MODIFIER	SERPINB11	483953	transcript	XR_002622847.1	pseudogene	12	n.2380-787T>A		-1	-1	-1	-1	-1	-1	0
1	13397980	A	T	PASS	intron_variant	MODIFIER	SERPINB11	483953	transcript	XR_002622866.1	pseudogene	12	n.2260-787T>A		-1	-1	-1	-1	-1	-1	0
1	13397980	A	T	PASS	intron_variant	MODIFIER	SERPINB11	483953	transcript	XR_002622832.1	pseudogene	12	n.2193-787T>A		-1	-1	-1	-1	-1	-1	0
1	13397980	A	T	PASS	intron_variant	MODIFIER	SERPINB11	483953	transcript	XR_002622910.1	pseudogene	12	n.2196-1121T>A		-1	-1	-1	-1	-1	-1	0
1	13397980	A	T	PASS	intron_variant	MODIFIER	SERPINB11	483953	transcript	XR_002622935.1	pseudogene	12	n.2193-1121T>A		-1	-1	-1	-1	-1	-1	0
1	13397980	A	T	PASS	intron_variant	MODIFIER	SERPINB11	483953	transcript	XR_002622952.1	pseudogene	12	n.2193-787T>A		-1	-1	-1	-1	-1	-1	0
1	13397980	A	T	PASS	intron_variant	MODIFIER	SERPINB11	483953	transcript	XR_002622978.1	pseudogene	11	n.2079-787T>A		-1	-1	-1	-1	-1	-1	0
1	13397980	A	T	PASS	intron_variant	MODIFIER	SERPINB11	483953	transcript	XR_002623008.1	pseudogene	12	n.2146-787T>A		-1	-1	-1	-1	-1	-1	0
1	13397980	A	T	PASS	intron_variant	MODIFIER	SERPINB11	483953	transcript	XR_002623036.1	pseudogene	10	n.2008-787T>A		-1	-1	-1	-1	-1	-1	0
1	13397980	A	T	PASS	intron_variant	MODIFIER	SERPINB11	483953	transcript	XR_002623048.1	pseudogene	10	n.1894-787T>A		-1	-1	-1	-1	-1	-1	0
1	13397980	A	T	PASS	intron_variant	MODIFIER	SERPINB11	483953	transcript	XR_002622837.1	pseudogene	13	n.2253-787T>A		-1	-1	-1	-1	-1	-1	0
1	13397980	A	T	PASS	intron_variant	MODIFIER	SERPINB11	483953	transcript	XR_002622979.1	pseudogene	12	n.2317-787T>A		-1	-1	-1	-1	-1	-1	0
1	13397980	A	T	PASS	intron_variant	MODIFIER	SERPINB11	483953	transcript	XR_002622993.1	pseudogene	13	n.2384-787T>A		-1	-1	-1	-1	-1	-1	0
1	13398022	G	T	PASS	intron_variant	MODIFIER	SERPINB11	483953	transcript	XR_002623050.1	pseudogene	1	n.18+296C>A		-1	-1	-1	-1	-1	-1	0
1	13398022	G	T	PASS	intron_variant	MODIFIER	SERPINB11	483953	transcript	XR_002623044.1	pseudogene	9	n.1635-829C>A		-1	-1	-1	-1	-1	-1	0
1	13398022	G	T	PASS	intron_variant	MODIFIER	SERPINB11	483953	transcript	XR_002622879.1	pseudogene	11	n.1822-829C>A		-1	-1	-1	-1	-1	-1	0
1	13398022	G	T	PASS	intron_variant	MODIFIER	SERPINB11	483953	transcript	XR_002622847.1	pseudogene	12	n.2380-829C>A		-1	-1	-1	-1	-1	-1	0
1	13398022	G	T	PASS	intron_variant	MODIFIER	SERPINB11	483953	transcript	XR_002622866.1	pseudogene	12	n.2260-829C>A		-1	-1	-1	-1	-1	-1	0
1	13398022	G	T	PASS	intron_variant	MODIFIER	SERPINB11	483953	transcript	XR_002622832.1	pseudogene	12	n.2193-829C>A		-1	-1	-1	-1	-1	-1	0
1	13398022	G	T	PASS	intron_variant	MODIFIER	SERPINB11	483953	transcript	XR_002622910.1	pseudogene	12	n.2196-1163C>A		-1	-1	-1	-1	-1	-1	0
1	13398022	G	T	PASS	intron_variant	MODIFIER	SERPINB11	483953	transcript	XR_002622935.1	pseudogene	12	n.2193-1163C>A		-1	-1	-1	-1	-1	-1	0
1	13398022	G	T	PASS	intron_variant	MODIFIER	SERPINB11	483953	transcript	XR_002622952.1	pseudogene	12	n.2193-829C>A		-1	-1	-1	-1	-1	-1	0
1	13398022	G	T	PASS	intron_variant	MODIFIER	SERPINB11	483953	transcript	XR_002622978.1	pseudogene	11	n.2079-829C>A		-1	-1	-1	-1	-1	-1	0
1	13398022	G	T	PASS	intron_variant	MODIFIER	SERPINB11	483953	transcript	XR_002623008.1	pseudogene	12	n.2146-829C>A		-1	-1	-1	-1	-1	-1	0
1	13398022	G	T	PASS	intron_variant	MODIFIER	SERPINB11	483953	transcript	XR_002623036.1	pseudogene	10	n.2008-829C>A		-1	-1	-1	-1	-1	-1	0
1	13398022	G	T	PASS	intron_variant	MODIFIER	SERPINB11	483953	transcript	XR_002623048.1	pseudogene	10	n.1894-829C>A		-1	-1	-1	-1	-1	-1	0
1	13398022	G	T	PASS	intron_variant	MODIFIER	SERPINB11	483953	transcript	XR_002622837.1	pseudogene	13	n.2253-829C>A		-1	-1	-1	-1	-1	-1	0
1	13398022	G	T	PASS	intron_variant	MODIFIER	SERPINB11	483953	transcript	XR_002622979.1	pseudogene	12	n.2317-829C>A		-1	-1	-1	-1	-1	-1	0
1	13398022	G	T	PASS	intron_variant	MODIFIER	SERPINB11	483953	transcript	XR_002622993.1	pseudogene	13	n.2384-829C>A		-1	-1	-1	-1	-1	-1	0
1	13427486	G	T	PASS	intron_variant	MODIFIER	SERPINB11	483953	transcript	XM_022414533.1	protein_coding	5	c.346-576C>A		-1	-1	-1	-1	-1	-1	0
1	13427486	G	T	PASS	intron_variant	MODIFIER	SERPINB11	483953	transcript	XR_002623044.1	pseudogene	2	n.337-576C>A		-1	-1	-1	-1	-1	-1	0
1	13427486	G	T	PASS	intron_variant	MODIFIER	SERPINB11	483953	transcript	XR_002622879.1	pseudogene	4	n.524-576C>A		-1	-1	-1	-1	-1	-1	0
1	13427486	G	T	PASS	intron_variant	MODIFIER	SERPINB11	483953	transcript	XR_002622847.1	pseudogene	5	n.1082-576C>A		-1	-1	-1	-1	-1	-1	0
1	13427486	G	T	PASS	intron_variant	MODIFIER	SERPINB11	483953	transcript	XR_002622866.1	pseudogene	5	n.962-576C>A		-1	-1	-1	-1	-1	-1	0
1	13427486	G	T	PASS	intron_variant	MODIFIER	SERPINB11	483953	transcript	XR_002622832.1	pseudogene	5	n.895-576C>A		-1	-1	-1	-1	-1	-1	0
1	13427486	G	T	PASS	intron_variant	MODIFIER	SERPINB11	483953	transcript	XR_002622910.1	pseudogene	5	n.895-576C>A		-1	-1	-1	-1	-1	-1	0
1	13427486	G	T	PASS	intron_variant	MODIFIER	SERPINB11	483953	transcript	XR_002622935.1	pseudogene	5	n.895-576C>A		-1	-1	-1	-1	-1	-1	0
1	13427486	G	T	PASS	intron_variant	MODIFIER	SERPINB11	483953	transcript	XR_002622952.1	pseudogene	5	n.895-576C>A		-1	-1	-1	-1	-1	-1	0
1	13427486	G	T	PASS	intron_variant	MODIFIER	SERPINB11	483953	transcript	XR_002622978.1	pseudogene	4	n.781-576C>A		-1	-1	-1	-1	-1	-1	0
1	13427486	G	T	PASS	intron_variant	MODIFIER	SERPINB11	483953	transcript	XR_002623008.1	pseudogene	5	n.848-576C>A		-1	-1	-1	-1	-1	-1	0
1	13427486	G	T	PASS	intron_variant	MODIFIER	SERPINB11	483953	transcript	XR_002623036.1	pseudogene	3	n.710-576C>A		-1	-1	-1	-1	-1	-1	0
1	13427486	G	T	PASS	intron_variant	MODIFIER	SERPINB11	483953	transcript	XR_002623048.1	pseudogene	3	n.596-576C>A		-1	-1	-1	-1	-1	-1	0
1	13427486	G	T	PASS	intron_variant	MODIFIER	SERPINB11	483953	transcript	XR_002622837.1	pseudogene	6	n.955-576C>A		-1	-1	-1	-1	-1	-1	0
1	13427486	G	T	PASS	intron_variant	MODIFIER	SERPINB11	483953	transcript	XR_002622979.1	pseudogene	5	n.1019-576C>A		-1	-1	-1	-1	-1	-1	0
1	13427486	G	T	PASS	intron_variant	MODIFIER	SERPINB11	483953	transcript	XR_002622993.1	pseudogene	6	n.1086-576C>A		-1	-1	-1	-1	-1	-1	0
1	13438922	A	G	PASS	intron_variant	MODIFIER	SERPINB11	483953	transcript	XM_022414533.1	protein_coding	4	c.161-10408T>C		-1	-1	-1	-1	-1	-1	0
1	13438922	A	G	PASS	intron_variant	MODIFIER	SERPINB11	483953	transcript	XR_002622879.1	pseudogene	3	n.339-10408T>C		-1	-1	-1	-1	-1	-1	0
1	13438922	A	G	PASS	intron_variant	MODIFIER	SERPINB11	483953	transcript	XR_002622847.1	pseudogene	4	n.897-10408T>C		-1	-1	-1	-1	-1	-1	0
1	13438922	A	G	PASS	intron_variant	MODIFIER	SERPINB11	483953	transcript	XR_002622866.1	pseudogene	4	n.777-10408T>C		-1	-1	-1	-1	-1	-1	0
1	13438922	A	G	PASS	intron_variant	MODIFIER	SERPINB11	483953	transcript	XR_002622832.1	pseudogene	4	n.710-10408T>C		-1	-1	-1	-1	-1	-1	0
1	13438922	A	G	PASS	intron_variant	MODIFIER	SERPINB11	483953	transcript	XR_002622910.1	pseudogene	4	n.710-10408T>C		-1	-1	-1	-1	-1	-1	0
1	13438922	A	G	PASS	intron_variant	MODIFIER	SERPINB11	483953	transcript	XR_002622935.1	pseudogene	4	n.710-10408T>C		-1	-1	-1	-1	-1	-1	0
1	13438922	A	G	PASS	intron_variant	MODIFIER	SERPINB11	483953	transcript	XR_002622952.1	pseudogene	4	n.710-10408T>C		-1	-1	-1	-1	-1	-1	0
1	13438922	A	G	PASS	intron_variant	MODIFIER	SERPINB11	483953	transcript	XR_002622978.1	pseudogene	3	n.596-10408T>C		-1	-1	-1	-1	-1	-1	0
1	13438922	A	G	PASS	intron_variant	MODIFIER	SERPINB11	483953	transcript	XR_002623008.1	pseudogene	4	n.663-10408T>C		-1	-1	-1	-1	-1	-1	0
1	13438922	A	G	PASS	intron_variant	MODIFIER	SERPINB11	483953	transcript	XR_002623036.1	pseudogene	2	n.525-10408T>C		-1	-1	-1	-1	-1	-1	0
1	13438922	A	G	PASS	intron_variant	MODIFIER	SERPINB11	483953	transcript	XR_002623048.1	pseudogene	3	n.596-12012T>C		-1	-1	-1	-1	-1	-1	0
1	13438922	A	G	PASS	intron_variant	MODIFIER	SERPINB11	483953	transcript	XR_002622837.1	pseudogene	5	n.770-10408T>C		-1	-1	-1	-1	-1	-1	0
1	13438922	A	G	PASS	intron_variant	MODIFIER	SERPINB11	483953	transcript	XR_002622979.1	pseudogene	4	n.834-10408T>C		-1	-1	-1	-1	-1	-1	0
1	13438922	A	G	PASS	intron_variant	MODIFIER	SERPINB11	483953	transcript	XR_002622993.1	pseudogene	5	n.901-10408T>C		-1	-1	-1	-1	-1	-1	0
1	13446597	G	A	PASS	intron_variant	MODIFIER	SERPINB11	483953	transcript	XM_022414533.1	protein_coding	4	c.161-18083C>T		-1	-1	-1	-1	-1	-1	0
1	13446597	G	A	PASS	intron_variant	MODIFIER	SERPINB11	483953	transcript	XR_002622879.1	pseudogene	3	n.339-18083C>T		-1	-1	-1	-1	-1	-1	0
1	13446597	G	A	PASS	intron_variant	MODIFIER	SERPINB11	483953	transcript	XR_002622847.1	pseudogene	4	n.897-18083C>T		-1	-1	-1	-1	-1	-1	0
1	13446597	G	A	PASS	intron_variant	MODIFIER	SERPINB11	483953	transcript	XR_002622866.1	pseudogene	4	n.777-18083C>T		-1	-1	-1	-1	-1	-1	0
1	13446597	G	A	PASS	intron_variant	MODIFIER	SERPINB11	483953	transcript	XR_002622832.1	pseudogene	4	n.710-18083C>T		-1	-1	-1	-1	-1	-1	0
1	13446597	G	A	PASS	intron_variant	MODIFIER	SERPINB11	483953	transcript	XR_002622910.1	pseudogene	4	n.710-18083C>T		-1	-1	-1	-1	-1	-1	0
1	13446597	G	A	PASS	intron_variant	MODIFIER	SERPINB11	483953	transcript	XR_002622935.1	pseudogene	4	n.710-18083C>T		-1	-1	-1	-1	-1	-1	0
1	13446597	G	A	PASS	intron_variant	MODIFIER	SERPINB11	483953	transcript	XR_002622952.1	pseudogene	4	n.710-18083C>T		-1	-1	-1	-1	-1	-1	0
1	13446597	G	A	PASS	intron_variant	MODIFIER	SERPINB11	483953	transcript	XR_002622978.1	pseudogene	3	n.596-18083C>T		-1	-1	-1	-1	-1	-1	0
1	13446597	G	A	PASS	intron_variant	MODIFIER	SERPINB11	483953	transcript	XR_002623008.1	pseudogene	4	n.662+17064C>T		-1	-1	-1	-1	-1	-1	0
1	13446597	G	A	PASS	intron_variant	MODIFIER	SERPINB11	483953	transcript	XR_002623036.1	pseudogene	2	n.525-18083C>T		-1	-1	-1	-1	-1	-1	0
1	13446597	G	A	PASS	intron_variant	MODIFIER	SERPINB11	483953	transcript	XR_002623048.1	pseudogene	3	n.596-19687C>T		-1	-1	-1	-1	-1	-1	0
1	13446597	G	A	PASS	intron_variant	MODIFIER	SERPINB11	483953	transcript	XR_002622837.1	pseudogene	5	n.770-18083C>T		-1	-1	-1	-1	-1	-1	0
1	13446597	G	A	PASS	intron_variant	MODIFIER	SERPINB11	483953	transcript	XR_002622979.1	pseudogene	4	n.833+6066C>T		-1	-1	-1	-1	-1	-1	0
1	13446597	G	A	PASS	intron_variant	MODIFIER	SERPINB11	483953	transcript	XR_002622993.1	pseudogene	5	n.900+6066C>T		-1	-1	-1	-1	-1	-1	0
1	13460691	C	T	PASS	intron_variant	MODIFIER	SERPINB11	483953	transcript	XM_022414533.1	protein_coding	4	c.160+6769G>A		-1	-1	-1	-1	-1	-1	0
1	13460691	C	T	PASS	intron_variant	MODIFIER	SERPINB11	483953	transcript	XR_002622879.1	pseudogene	3	n.338+6769G>A		-1	-1	-1	-1	-1	-1	0
1	13460691	C	T	PASS	intron_variant	MODIFIER	SERPINB11	483953	transcript	XR_002622847.1	pseudogene	4	n.896+6769G>A		-1	-1	-1	-1	-1	-1	0
1	13460691	C	T	PASS	intron_variant	MODIFIER	SERPINB11	483953	transcript	XR_002622866.1	pseudogene	4	n.776+6769G>A		-1	-1	-1	-1	-1	-1	0
1	13460691	C	T	PASS	intron_variant	MODIFIER	SERPINB11	483953	transcript	XR_002622832.1	pseudogene	4	n.709+6769G>A		-1	-1	-1	-1	-1	-1	0
1	13460691	C	T	PASS	intron_variant	MODIFIER	SERPINB11	483953	transcript	XR_002622910.1	pseudogene	4	n.709+6769G>A		-1	-1	-1	-1	-1	-1	0
1	13460691	C	T	PASS	intron_variant	MODIFIER	SERPINB11	483953	transcript	XR_002622935.1	pseudogene	4	n.709+6769G>A		-1	-1	-1	-1	-1	-1	0
1	13460691	C	T	PASS	intron_variant	MODIFIER	SERPINB11	483953	transcript	XR_002622952.1	pseudogene	4	n.709+6769G>A		-1	-1	-1	-1	-1	-1	0
1	13460691	C	T	PASS	intron_variant	MODIFIER	SERPINB11	483953	transcript	XR_002622978.1	pseudogene	3	n.595+6769G>A		-1	-1	-1	-1	-1	-1	0
1	13460691	C	T	PASS	intron_variant	MODIFIER	SERPINB11	483953	transcript	XR_002623008.1	pseudogene	4	n.662+2970G>A		-1	-1	-1	-1	-1	-1	0
1	13460691	C	T	PASS	intron_variant	MODIFIER	SERPINB11	483953	transcript	XR_002623036.1	pseudogene	2	n.524+11082G>A		-1	-1	-1	-1	-1	-1	0
1	13460691	C	T	PASS	intron_variant	MODIFIER	SERPINB11	483953	transcript	XR_002623048.1	pseudogene	3	n.595+6769G>A		-1	-1	-1	-1	-1	-1	0
1	13460691	C	T	PASS	intron_variant	MODIFIER	SERPINB11	483953	transcript	XR_002622837.1	pseudogene	5	n.769+6769G>A		-1	-1	-1	-1	-1	-1	0
1	13460691	C	T	PASS	intron_variant	MODIFIER	SERPINB11	483953	transcript	XR_002622979.1	pseudogene	3	n.596+6769G>A		-1	-1	-1	-1	-1	-1	0
1	13460691	C	T	PASS	intron_variant	MODIFIER	SERPINB11	483953	transcript	XR_002622993.1	pseudogene	4	n.663+2970G>A		-1	-1	-1	-1	-1	-1	0
1	13517769	A	T	PASS	3_prime_UTR_variant	MODIFIER	SERPINB12	100687047	transcript	XM_005615343.2	protein_coding	8	c.*1081T>A		-1	-1	-1	-1	-1	-1	1081
1	13517769	A	T	PASS	3_prime_UTR_variant	MODIFIER	SERPINB12	100687047	transcript	XM_022414794.1	protein_coding	8	c.*1081T>A		-1	-1	-1	-1	-1	-1	1081
1	13517810	C	CT	PASS	3_prime_UTR_variant	MODIFIER	SERPINB12	100687047	transcript	XM_005615343.2	protein_coding	8	c.*1039dupA		-1	-1	-1	-1	-1	-1	1039
1	13517810	C	CT	PASS	3_prime_UTR_variant	MODIFIER	SERPINB12	100687047	transcript	XM_022414794.1	protein_coding	8	c.*1039dupA		-1	-1	-1	-1	-1	-1	1039
1	14033876	A	G	PASS	intron_variant	MODIFIER	PHLPP1	476179	transcript	XM_005615667.3	protein_coding	15	c.2757-239T>C		-1	-1	-1	-1	-1	-1	0
1	14267994	G	A	PASS	intergenic_region	MODIFIER	PHLPP1-LOC111094566	476179-111094566	intergenic_region	476179-111094566		-1	n.14267994G>A		-1	-1	-1	-1	-1	-1	0
1	15771312	A	G	PASS	intergenic_region	MODIFIER	LOC100688146-LOC483960	100688146-483960	intergenic_region	100688146-483960		-1	n.15771312A>G		-1	-1	-1	-1	-1	-1	0
1	15891119	A	ACCC	PASS	intergenic_region	MODIFIER	LOC100688146-LOC483960	100688146-483960	intergenic_region	100688146-483960		-1	n.15891119_15891120insCCC		-1	-1	-1	-1	-1	-1	0
1	16489568	GTGGT	G	QD2	upstream_gene_variant	MODIFIER	LOC111094866	111094866	transcript	XR_002624433.1	pseudogene	-1	n.-1368_-1365delTGGT		-1	-1	-1	-1	-1	-1	1368
1	16489568	GTGGT	G	QD2	intron_variant	MODIFIER	LOC111094866	111094866	transcript	XR_002624426.1	pseudogene	1	n.224+461_224+464delTGGT		-1	-1	-1	-1	-1	-1	0
1	16489568	GTGGT	G	QD2	intron_variant	MODIFIER	LOC111094866	111094866	transcript	XR_002624430.1	pseudogene	1	n.224+461_224+464delTGGT		-1	-1	-1	-1	-1	-1	0
1	17318800	C	T	PASS	intergenic_region	MODIFIER	ZNF532-LOC106557891	476187-106557891	intergenic_region	476187-106557891		-1	n.17318800C>T		-1	-1	-1	-1	-1	-1	0
1	17872510	C	T	PASS	intergenic_region	MODIFIER	NEDD4L-LOC111097471	476189-111097471	intergenic_region	476189-111097471		-1	n.17872510C>T		-1	-1	-1	-1	-1	-1	0
1	18286987	G	A	PASS	intron_variant	MODIFIER	LOC111095132	111095132	transcript	XR_002624838.1	pseudogene	2	n.128+10800C>T		-1	-1	-1	-1	-1	-1	0
1	18325505	G	A	PASS	intron_variant	MODIFIER	NARS	607631	transcript	XM_843967.5	protein_coding	5	c.375+540G>A		-1	-1	-1	-1	-1	-1	0
1	18325505	G	A	PASS	intron_variant	MODIFIER	NARS	607631	transcript	XM_014109219.2	protein_coding	5	c.372+540G>A		-1	-1	-1	-1	-1	-1	0
1	18779464	C	T	PASS	intergenic_region	MODIFIER	ST8SIA3-WDR7	612940-476191	intergenic_region	612940-476191		-1	n.18779464C>T		-1	-1	-1	-1	-1	-1	0
1	18825303	C	T	PASS	intron_variant	MODIFIER	WDR7	476191	transcript	XM_005615377.3	protein_coding	28	c.4183-10443G>A		-1	-1	-1	-1	-1	-1	0
1	18825303	C	T	PASS	intron_variant	MODIFIER	WDR7	476191	transcript	XM_022416730.1	protein_coding	27	c.4183-10443G>A		-1	-1	-1	-1	-1	-1	0
1	18825303	C	T	PASS	intron_variant	MODIFIER	WDR7	476191	transcript	XM_005615379.3	protein_coding	27	c.4156-10443G>A		-1	-1	-1	-1	-1	-1	0
1	18825303	C	T	PASS	intron_variant	MODIFIER	WDR7	476191	transcript	XM_005615380.3	protein_coding	27	c.4084-10443G>A		-1	-1	-1	-1	-1	-1	0
1	18834881	C	T	PASS	intron_variant	MODIFIER	WDR7	476191	transcript	XM_005615377.3	protein_coding	28	c.4183-20021G>A		-1	-1	-1	-1	-1	-1	0
1	18834881	C	T	PASS	intron_variant	MODIFIER	WDR7	476191	transcript	XM_022416730.1	protein_coding	27	c.4183-20021G>A		-1	-1	-1	-1	-1	-1	0
1	18834881	C	T	PASS	intron_variant	MODIFIER	WDR7	476191	transcript	XM_005615379.3	protein_coding	27	c.4156-20021G>A		-1	-1	-1	-1	-1	-1	0
1	18834881	C	T	PASS	intron_variant	MODIFIER	WDR7	476191	transcript	XM_005615380.3	protein_coding	27	c.4084-20021G>A		-1	-1	-1	-1	-1	-1	0
1	18837182	T	C	PASS	intron_variant	MODIFIER	WDR7	476191	transcript	XM_005615377.3	protein_coding	28	c.4183-22322A>G		-1	-1	-1	-1	-1	-1	0
1	18837182	T	C	PASS	intron_variant	MODIFIER	WDR7	476191	transcript	XM_022416730.1	protein_coding	27	c.4183-22322A>G		-1	-1	-1	-1	-1	-1	0
1	18837182	T	C	PASS	intron_variant	MODIFIER	WDR7	476191	transcript	XM_005615379.3	protein_coding	27	c.4156-22322A>G		-1	-1	-1	-1	-1	-1	0
1	18837182	T	C	PASS	intron_variant	MODIFIER	WDR7	476191	transcript	XM_005615380.3	protein_coding	27	c.4084-22322A>G		-1	-1	-1	-1	-1	-1	0
1	18931982	A	C	PASS	downstream_gene_variant	MODIFIER	WDR7	476191	transcript	XM_022416737.1	protein_coding	-1	c.*3249T>G		-1	-1	-1	-1	-1	-1	2141
1	18931982	A	C	PASS	intron_variant	MODIFIER	WDR7	476191	transcript	XM_005615377.3	protein_coding	23	c.3545-17262T>G		-1	-1	-1	-1	-1	-1	0
1	18931982	A	C	PASS	intron_variant	MODIFIER	WDR7	476191	transcript	XM_022416730.1	protein_coding	22	c.3545-17262T>G		-1	-1	-1	-1	-1	-1	0
1	18931982	A	C	PASS	intron_variant	MODIFIER	WDR7	476191	transcript	XM_005615379.3	protein_coding	22	c.3518-17262T>G		-1	-1	-1	-1	-1	-1	0
1	18931982	A	C	PASS	intron_variant	MODIFIER	WDR7	476191	transcript	XM_005615380.3	protein_coding	22	c.3446-17262T>G		-1	-1	-1	-1	-1	-1	0
1	18931982	A	C	PASS	intron_variant	MODIFIER	WDR7	476191	transcript	XM_022416736.1	protein_coding	23	c.3545-17262T>G		-1	-1	-1	-1	-1	-1	0
1	18998702	G	A	PASS	intron_variant	MODIFIER	WDR7	476191	transcript	XM_005615377.3	protein_coding	22	c.3322+4105C>T		-1	-1	-1	-1	-1	-1	0
1	18998702	G	A	PASS	intron_variant	MODIFIER	WDR7	476191	transcript	XM_022416730.1	protein_coding	21	c.3322+4105C>T		-1	-1	-1	-1	-1	-1	0
1	18998702	G	A	PASS	intron_variant	MODIFIER	WDR7	476191	transcript	XM_005615379.3	protein_coding	21	c.3295+4105C>T		-1	-1	-1	-1	-1	-1	0
1	18998702	G	A	PASS	intron_variant	MODIFIER	WDR7	476191	transcript	XM_005615380.3	protein_coding	21	c.3223+4105C>T		-1	-1	-1	-1	-1	-1	0
1	18998702	G	A	PASS	intron_variant	MODIFIER	WDR7	476191	transcript	XM_022416736.1	protein_coding	22	c.3322+4105C>T		-1	-1	-1	-1	-1	-1	0
1	18998702	G	A	PASS	intron_variant	MODIFIER	WDR7	476191	transcript	XM_022416737.1	protein_coding	22	c.3322+4105C>T		-1	-1	-1	-1	-1	-1	0
1	19049883	G	C	PASS	intron_variant	MODIFIER	WDR7	476191	transcript	XM_005615377.3	protein_coding	18	c.2866+6845C>G		-1	-1	-1	-1	-1	-1	0
1	19049883	G	C	PASS	intron_variant	MODIFIER	WDR7	476191	transcript	XM_022416730.1	protein_coding	17	c.2866+6845C>G		-1	-1	-1	-1	-1	-1	0
1	19049883	G	C	PASS	intron_variant	MODIFIER	WDR7	476191	transcript	XM_005615379.3	protein_coding	17	c.2839+6845C>G		-1	-1	-1	-1	-1	-1	0
1	19049883	G	C	PASS	intron_variant	MODIFIER	WDR7	476191	transcript	XM_005615380.3	protein_coding	18	c.2866+6845C>G		-1	-1	-1	-1	-1	-1	0
1	19049883	G	C	PASS	intron_variant	MODIFIER	WDR7	476191	transcript	XM_022416736.1	protein_coding	18	c.2866+6845C>G		-1	-1	-1	-1	-1	-1	0
1	19049883	G	C	PASS	intron_variant	MODIFIER	WDR7	476191	transcript	XM_022416737.1	protein_coding	18	c.2866+6845C>G		-1	-1	-1	-1	-1	-1	0
1	19105193	G	A	PASS	intron_variant	MODIFIER	WDR7	476191	transcript	XM_005615377.3	protein_coding	14	c.1596+5417C>T		-1	-1	-1	-1	-1	-1	0
1	19105193	G	A	PASS	intron_variant	MODIFIER	WDR7	476191	transcript	XM_022416730.1	protein_coding	13	c.1596+5417C>T		-1	-1	-1	-1	-1	-1	0
1	19105193	G	A	PASS	intron_variant	MODIFIER	WDR7	476191	transcript	XM_005615379.3	protein_coding	13	c.1569+5417C>T		-1	-1	-1	-1	-1	-1	0
1	19105193	G	A	PASS	intron_variant	MODIFIER	WDR7	476191	transcript	XM_005615380.3	protein_coding	14	c.1596+5417C>T		-1	-1	-1	-1	-1	-1	0
1	19105193	G	A	PASS	intron_variant	MODIFIER	WDR7	476191	transcript	XM_022416736.1	protein_coding	14	c.1596+5417C>T		-1	-1	-1	-1	-1	-1	0
1	19105193	G	A	PASS	intron_variant	MODIFIER	WDR7	476191	transcript	XM_022416737.1	protein_coding	14	c.1596+5417C>T		-1	-1	-1	-1	-1	-1	0
1	19136235	G	A	PASS	intron_variant	MODIFIER	WDR7	476191	transcript	XM_005615377.3	protein_coding	4	c.186+543C>T		-1	-1	-1	-1	-1	-1	0
1	19136235	G	A	PASS	intron_variant	MODIFIER	WDR7	476191	transcript	XM_022416730.1	protein_coding	3	c.186+543C>T		-1	-1	-1	-1	-1	-1	0
1	19136235	G	A	PASS	intron_variant	MODIFIER	WDR7	476191	transcript	XM_005615379.3	protein_coding	3	c.159+543C>T		-1	-1	-1	-1	-1	-1	0
1	19136235	G	A	PASS	intron_variant	MODIFIER	WDR7	476191	transcript	XM_005615380.3	protein_coding	4	c.186+543C>T		-1	-1	-1	-1	-1	-1	0
1	19136235	G	A	PASS	intron_variant	MODIFIER	WDR7	476191	transcript	XM_022416736.1	protein_coding	4	c.186+543C>T		-1	-1	-1	-1	-1	-1	0
1	19136235	G	A	PASS	intron_variant	MODIFIER	WDR7	476191	transcript	XM_022416737.1	protein_coding	4	c.186+543C>T		-1	-1	-1	-1	-1	-1	0
1	19227914	T	A	PASS	intergenic_region	MODIFIER	TXNL1-LOC111095152	483970-111095152	intergenic_region	483970-111095152		-1	n.19227914T>A		-1	-1	-1	-1	-1	-1	0
1	19405206	C	CT	PASS	intergenic_region	MODIFIER	LOC111095155-LOC111090613	111095155-111090613	intergenic_region	111095155-111090613		-1	n.19405206_19405207insT		-1	-1	-1	-1	-1	-1	0
1	19495324	G	A	PASS	intergenic_region	MODIFIER	LOC102153304-LOC111090614	102153304-111090614	intergenic_region	102153304-111090614		-1	n.19495324G>A		-1	-1	-1	-1	-1	-1	0
1	19510693	C	A	PASS	downstream_gene_variant	MODIFIER	LOC111090614	111090614	transcript	XR_002615317.1	pseudogene	-1	n.*4628G>T		-1	-1	-1	-1	-1	-1	4628
1	19510693	C	A	PASS	intergenic_region	MODIFIER	LOC102153304-LOC111090614	102153304-111090614	intergenic_region	102153304-111090614		-1	n.19510693C>A		-1	-1	-1	-1	-1	-1	0
1	19519069	C	T	PASS	intron_variant	MODIFIER	LOC111090614	111090614	transcript	XR_002615317.1	pseudogene	1	n.602+772G>A		-1	-1	-1	-1	-1	-1	0
1	19561722	T	C	PASS	intergenic_region	MODIFIER	LOC111090614-LOC111090615	111090614-111090615	intergenic_region	111090614-111090615		-1	n.19561722T>C		-1	-1	-1	-1	-1	-1	0
1	19621214	ATC	A	PASS	intergenic_region	MODIFIER	LOC111090616-LOC102153337	111090616-102153337	intergenic_region	111090616-102153337		-1	n.19621215_19621216delTC		-1	-1	-1	-1	-1	-1	0
1	19628570	CTTGTT	C	PASS	intergenic_region	MODIFIER	LOC111090616-LOC102153337	111090616-102153337	intergenic_region	111090616-102153337		-1	n.19628571_19628575delTTGTT		-1	-1	-1	-1	-1	-1	0
1	19628577	CAT	C	PASS	intergenic_region	MODIFIER	LOC111090616-LOC102153337	111090616-102153337	intergenic_region	111090616-102153337		-1	n.19628578_19628579delAT		-1	-1	-1	-1	-1	-1	0
1	19629544	A	C	PASS	intergenic_region	MODIFIER	LOC111090616-LOC102153337	111090616-102153337	intergenic_region	111090616-102153337		-1	n.19629544A>C		-1	-1	-1	-1	-1	-1	0
1	19629560	C	A	PASS	intergenic_region	MODIFIER	LOC111090616-LOC102153337	111090616-102153337	intergenic_region	111090616-102153337		-1	n.19629560C>A		-1	-1	-1	-1	-1	-1	0
1	19629567	G	T	PASS	intergenic_region	MODIFIER	LOC111090616-LOC102153337	111090616-102153337	intergenic_region	111090616-102153337		-1	n.19629567G>T		-1	-1	-1	-1	-1	-1	0
1	19629879	T	C	PASS	intergenic_region	MODIFIER	LOC111090616-LOC102153337	111090616-102153337	intergenic_region	111090616-102153337		-1	n.19629879T>C		-1	-1	-1	-1	-1	-1	0
1	19630020	G	A	PASS	intergenic_region	MODIFIER	LOC111090616-LOC102153337	111090616-102153337	intergenic_region	111090616-102153337		-1	n.19630020G>A		-1	-1	-1	-1	-1	-1	0
1	19630555	T	TA	PASS	intergenic_region	MODIFIER	LOC111090616-LOC102153337	111090616-102153337	intergenic_region	111090616-102153337		-1	n.19630555_19630556insA		-1	-1	-1	-1	-1	-1	0
1	19630560	C	T	PASS	intergenic_region	MODIFIER	LOC111090616-LOC102153337	111090616-102153337	intergenic_region	111090616-102153337		-1	n.19630560C>T		-1	-1	-1	-1	-1	-1	0
1	19630856	CT	C	PASS	intergenic_region	MODIFIER	LOC111090616-LOC102153337	111090616-102153337	intergenic_region	111090616-102153337		-1	n.19630857delT		-1	-1	-1	-1	-1	-1	0
1	19631619	G	C	PASS	intergenic_region	MODIFIER	LOC111090616-LOC102153337	111090616-102153337	intergenic_region	111090616-102153337		-1	n.19631619G>C		-1	-1	-1	-1	-1	-1	0
1	19632081	C	T	PASS	intergenic_region	MODIFIER	LOC111090616-LOC102153337	111090616-102153337	intergenic_region	111090616-102153337		-1	n.19632081C>T		-1	-1	-1	-1	-1	-1	0
1	19632090	T	C	PASS	intergenic_region	MODIFIER	LOC111090616-LOC102153337	111090616-102153337	intergenic_region	111090616-102153337		-1	n.19632090T>C		-1	-1	-1	-1	-1	-1	0
1	19632920	A	G	PASS	intergenic_region	MODIFIER	LOC111090616-LOC102153337	111090616-102153337	intergenic_region	111090616-102153337		-1	n.19632920A>G		-1	-1	-1	-1	-1	-1	0
1	19633819	G	A	PASS	intergenic_region	MODIFIER	LOC111090616-LOC102153337	111090616-102153337	intergenic_region	111090616-102153337		-1	n.19633819G>A		-1	-1	-1	-1	-1	-1	0
1	19634182	C	T	PASS	intergenic_region	MODIFIER	LOC111090616-LOC102153337	111090616-102153337	intergenic_region	111090616-102153337		-1	n.19634182C>T		-1	-1	-1	-1	-1	-1	0
1	19636702	G	GT	PASS	intergenic_region	MODIFIER	LOC111090616-LOC102153337	111090616-102153337	intergenic_region	111090616-102153337		-1	n.19636702_19636703insT		-1	-1	-1	-1	-1	-1	0
1	19637719	C	T	PASS	intergenic_region	MODIFIER	LOC111090616-LOC102153337	111090616-102153337	intergenic_region	111090616-102153337		-1	n.19637719C>T		-1	-1	-1	-1	-1	-1	0
1	19639636	A	C	PASS	intergenic_region	MODIFIER	LOC111090616-LOC102153337	111090616-102153337	intergenic_region	111090616-102153337		-1	n.19639636A>C		-1	-1	-1	-1	-1	-1	0
1	19640746	A	G	PASS	intergenic_region	MODIFIER	LOC111090616-LOC102153337	111090616-102153337	intergenic_region	111090616-102153337		-1	n.19640746A>G		-1	-1	-1	-1	-1	-1	0
1	19641710	C	T	PASS	intergenic_region	MODIFIER	LOC111090616-LOC102153337	111090616-102153337	intergenic_region	111090616-102153337		-1	n.19641710C>T		-1	-1	-1	-1	-1	-1	0
1	19642594	A	G	PASS	intergenic_region	MODIFIER	LOC111090616-LOC102153337	111090616-102153337	intergenic_region	111090616-102153337		-1	n.19642594A>G		-1	-1	-1	-1	-1	-1	0
1	19643115	G	T	PASS	intergenic_region	MODIFIER	LOC111090616-LOC102153337	111090616-102153337	intergenic_region	111090616-102153337		-1	n.19643115G>T		-1	-1	-1	-1	-1	-1	0
1	19643232	G	C	PASS	intergenic_region	MODIFIER	LOC111090616-LOC102153337	111090616-102153337	intergenic_region	111090616-102153337		-1	n.19643232G>C		-1	-1	-1	-1	-1	-1	0
1	19644143	G	C	PASS	intergenic_region	MODIFIER	LOC111090616-LOC102153337	111090616-102153337	intergenic_region	111090616-102153337		-1	n.19644143G>C		-1	-1	-1	-1	-1	-1	0
1	19646121	T	A	PASS	intergenic_region	MODIFIER	LOC111090616-LOC102153337	111090616-102153337	intergenic_region	111090616-102153337		-1	n.19646121T>A		-1	-1	-1	-1	-1	-1	0
1	19646177	G	A	PASS	intergenic_region	MODIFIER	LOC111090616-LOC102153337	111090616-102153337	intergenic_region	111090616-102153337		-1	n.19646177G>A		-1	-1	-1	-1	-1	-1	0
1	19647391	T	C	PASS	intergenic_region	MODIFIER	LOC111090616-LOC102153337	111090616-102153337	intergenic_region	111090616-102153337		-1	n.19647391T>C		-1	-1	-1	-1	-1	-1	0
1	19647484	C	T	PASS	intergenic_region	MODIFIER	LOC111090616-LOC102153337	111090616-102153337	intergenic_region	111090616-102153337		-1	n.19647484C>T		-1	-1	-1	-1	-1	-1	0
1	19651639	T	A	PASS	intergenic_region	MODIFIER	LOC111090616-LOC102153337	111090616-102153337	intergenic_region	111090616-102153337		-1	n.19651639T>A		-1	-1	-1	-1	-1	-1	0
1	19653307	C	T	PASS	intergenic_region	MODIFIER	LOC111090616-LOC102153337	111090616-102153337	intergenic_region	111090616-102153337		-1	n.19653307C>T		-1	-1	-1	-1	-1	-1	0
1	19653460	C	T	PASS	intergenic_region	MODIFIER	LOC111090616-LOC102153337	111090616-102153337	intergenic_region	111090616-102153337		-1	n.19653460C>T		-1	-1	-1	-1	-1	-1	0
1	19654101	C	T	PASS	intergenic_region	MODIFIER	LOC111090616-LOC102153337	111090616-102153337	intergenic_region	111090616-102153337		-1	n.19654101C>T		-1	-1	-1	-1	-1	-1	0
1	19654343	A	C	PASS	intergenic_region	MODIFIER	LOC111090616-LOC102153337	111090616-102153337	intergenic_region	111090616-102153337		-1	n.19654343A>C		-1	-1	-1	-1	-1	-1	0
1	19654374	A	G	PASS	intergenic_region	MODIFIER	LOC111090616-LOC102153337	111090616-102153337	intergenic_region	111090616-102153337		-1	n.19654374A>G		-1	-1	-1	-1	-1	-1	0
1	19654487	A	C	PASS	intergenic_region	MODIFIER	LOC111090616-LOC102153337	111090616-102153337	intergenic_region	111090616-102153337		-1	n.19654487A>C		-1	-1	-1	-1	-1	-1	0
1	19655622	C	T	PASS	intergenic_region	MODIFIER	LOC111090616-LOC102153337	111090616-102153337	intergenic_region	111090616-102153337		-1	n.19655622C>T		-1	-1	-1	-1	-1	-1	0
1	19657163	T	G	PASS	intergenic_region	MODIFIER	LOC111090616-LOC102153337	111090616-102153337	intergenic_region	111090616-102153337		-1	n.19657163T>G		-1	-1	-1	-1	-1	-1	0
1	19660068	A	AT	PASS	intergenic_region	MODIFIER	LOC111090616-LOC102153337	111090616-102153337	intergenic_region	111090616-102153337		-1	n.19660068_19660069insT		-1	-1	-1	-1	-1	-1	0
1	19660080	T	A	PASS	intergenic_region	MODIFIER	LOC111090616-LOC102153337	111090616-102153337	intergenic_region	111090616-102153337		-1	n.19660080T>A		-1	-1	-1	-1	-1	-1	0
1	19661127	C	G	PASS	intergenic_region	MODIFIER	LOC111090616-LOC102153337	111090616-102153337	intergenic_region	111090616-102153337		-1	n.19661127C>G		-1	-1	-1	-1	-1	-1	0
1	19661266	A	G	PASS	intergenic_region	MODIFIER	LOC111090616-LOC102153337	111090616-102153337	intergenic_region	111090616-102153337		-1	n.19661266A>G		-1	-1	-1	-1	-1	-1	0
1	19661923	G	C	PASS	intergenic_region	MODIFIER	LOC111090616-LOC102153337	111090616-102153337	intergenic_region	111090616-102153337		-1	n.19661923G>C		-1	-1	-1	-1	-1	-1	0
1	19662096	G	C	PASS	intergenic_region	MODIFIER	LOC111090616-LOC102153337	111090616-102153337	intergenic_region	111090616-102153337		-1	n.19662096G>C		-1	-1	-1	-1	-1	-1	0
1	19662169	C	T	PASS	intergenic_region	MODIFIER	LOC111090616-LOC102153337	111090616-102153337	intergenic_region	111090616-102153337		-1	n.19662169C>T		-1	-1	-1	-1	-1	-1	0
1	19662837	C	T	PASS	intergenic_region	MODIFIER	LOC111090616-LOC102153337	111090616-102153337	intergenic_region	111090616-102153337		-1	n.19662837C>T		-1	-1	-1	-1	-1	-1	0
1	19663088	C	T	PASS	intergenic_region	MODIFIER	LOC111090616-LOC102153337	111090616-102153337	intergenic_region	111090616-102153337		-1	n.19663088C>T		-1	-1	-1	-1	-1	-1	0
1	19663092	G	C	PASS	intergenic_region	MODIFIER	LOC111090616-LOC102153337	111090616-102153337	intergenic_region	111090616-102153337		-1	n.19663092G>C		-1	-1	-1	-1	-1	-1	0
1	19663882	GGAA	G	PASS	intergenic_region	MODIFIER	LOC111090616-LOC102153337	111090616-102153337	intergenic_region	111090616-102153337		-1	n.19663883_19663885delGAA		-1	-1	-1	-1	-1	-1	0
1	19664504	G	A	PASS	intergenic_region	MODIFIER	LOC111090616-LOC102153337	111090616-102153337	intergenic_region	111090616-102153337		-1	n.19664504G>A		-1	-1	-1	-1	-1	-1	0
1	19664546	G	T	PASS	intergenic_region	MODIFIER	LOC111090616-LOC102153337	111090616-102153337	intergenic_region	111090616-102153337		-1	n.19664546G>T		-1	-1	-1	-1	-1	-1	0
1	19664864	G	A	PASS	intergenic_region	MODIFIER	LOC111090616-LOC102153337	111090616-102153337	intergenic_region	111090616-102153337		-1	n.19664864G>A		-1	-1	-1	-1	-1	-1	0
1	19669040	T	C	PASS	intergenic_region	MODIFIER	LOC111090616-LOC102153337	111090616-102153337	intergenic_region	111090616-102153337		-1	n.19669040T>C		-1	-1	-1	-1	-1	-1	0
1	19673000	C	T	PASS	intergenic_region	MODIFIER	LOC111090616-LOC102153337	111090616-102153337	intergenic_region	111090616-102153337		-1	n.19673000C>T		-1	-1	-1	-1	-1	-1	0
1	19673590	T	C	PASS	intergenic_region	MODIFIER	LOC111090616-LOC102153337	111090616-102153337	intergenic_region	111090616-102153337		-1	n.19673590T>C		-1	-1	-1	-1	-1	-1	0
1	19673617	A	G	PASS	intergenic_region	MODIFIER	LOC111090616-LOC102153337	111090616-102153337	intergenic_region	111090616-102153337		-1	n.19673617A>G		-1	-1	-1	-1	-1	-1	0
1	19674523	G	C	PASS	intergenic_region	MODIFIER	LOC111090616-LOC102153337	111090616-102153337	intergenic_region	111090616-102153337		-1	n.19674523G>C		-1	-1	-1	-1	-1	-1	0
1	19674543	T	C	PASS	intergenic_region	MODIFIER	LOC111090616-LOC102153337	111090616-102153337	intergenic_region	111090616-102153337		-1	n.19674543T>C		-1	-1	-1	-1	-1	-1	0
1	19675807	CTG	C	PASS	intergenic_region	MODIFIER	LOC111090616-LOC102153337	111090616-102153337	intergenic_region	111090616-102153337		-1	n.19675808_19675809delTG		-1	-1	-1	-1	-1	-1	0
1	19701680	G	A	PASS	intergenic_region	MODIFIER	LOC111090616-LOC102153337	111090616-102153337	intergenic_region	111090616-102153337		-1	n.19701680G>A		-1	-1	-1	-1	-1	-1	0
1	19703960	G	A	PASS	intergenic_region	MODIFIER	LOC111090616-LOC102153337	111090616-102153337	intergenic_region	111090616-102153337		-1	n.19703960G>A		-1	-1	-1	-1	-1	-1	0
1	19704230	A	AT	PASS	intergenic_region	MODIFIER	LOC111090616-LOC102153337	111090616-102153337	intergenic_region	111090616-102153337		-1	n.19704230_19704231insT		-1	-1	-1	-1	-1	-1	0
1	19704273	G	GAGAGA	PASS	intergenic_region	MODIFIER	LOC111090616-LOC102153337	111090616-102153337	intergenic_region	111090616-102153337		-1	n.19704273_19704274insAGAGA		-1	-1	-1	-1	-1	-1	0
1	19704279	G	T	PASS	intergenic_region	MODIFIER	LOC111090616-LOC102153337	111090616-102153337	intergenic_region	111090616-102153337		-1	n.19704279G>T		-1	-1	-1	-1	-1	-1	0
1	19705057	G	A	PASS	intergenic_region	MODIFIER	LOC111090616-LOC102153337	111090616-102153337	intergenic_region	111090616-102153337		-1	n.19705057G>A		-1	-1	-1	-1	-1	-1	0
1	19705067	T	C	PASS	intergenic_region	MODIFIER	LOC111090616-LOC102153337	111090616-102153337	intergenic_region	111090616-102153337		-1	n.19705067T>C		-1	-1	-1	-1	-1	-1	0
1	19705104	G	A	PASS	intergenic_region	MODIFIER	LOC111090616-LOC102153337	111090616-102153337	intergenic_region	111090616-102153337		-1	n.19705104G>A		-1	-1	-1	-1	-1	-1	0
1	19705238	A	G	PASS	intergenic_region	MODIFIER	LOC111090616-LOC102153337	111090616-102153337	intergenic_region	111090616-102153337		-1	n.19705238A>G		-1	-1	-1	-1	-1	-1	0
1	19705295	A	T	PASS	intergenic_region	MODIFIER	LOC111090616-LOC102153337	111090616-102153337	intergenic_region	111090616-102153337		-1	n.19705295A>T		-1	-1	-1	-1	-1	-1	0
1	19705445	A	G	PASS	intergenic_region	MODIFIER	LOC111090616-LOC102153337	111090616-102153337	intergenic_region	111090616-102153337		-1	n.19705445A>G		-1	-1	-1	-1	-1	-1	0
1	19705744	T	C	PASS	intergenic_region	MODIFIER	LOC111090616-LOC102153337	111090616-102153337	intergenic_region	111090616-102153337		-1	n.19705744T>C		-1	-1	-1	-1	-1	-1	0
1	19706285	G	GA	PASS	intergenic_region	MODIFIER	LOC111090616-LOC102153337	111090616-102153337	intergenic_region	111090616-102153337		-1	n.19706285_19706286insA		-1	-1	-1	-1	-1	-1	0
1	19707479	G	A	PASS	intergenic_region	MODIFIER	LOC111090616-LOC102153337	111090616-102153337	intergenic_region	111090616-102153337		-1	n.19707479G>A		-1	-1	-1	-1	-1	-1	0
1	19707793	G	A	PASS	intergenic_region	MODIFIER	LOC111090616-LOC102153337	111090616-102153337	intergenic_region	111090616-102153337		-1	n.19707793G>A		-1	-1	-1	-1	-1	-1	0
1	19708130	G	A	PASS	intergenic_region	MODIFIER	LOC111090616-LOC102153337	111090616-102153337	intergenic_region	111090616-102153337		-1	n.19708130G>A		-1	-1	-1	-1	-1	-1	0
1	19708361	C	T	PASS	intergenic_region	MODIFIER	LOC111090616-LOC102153337	111090616-102153337	intergenic_region	111090616-102153337		-1	n.19708361C>T		-1	-1	-1	-1	-1	-1	0
1	19708567	G	A	PASS	intergenic_region	MODIFIER	LOC111090616-LOC102153337	111090616-102153337	intergenic_region	111090616-102153337		-1	n.19708567G>A		-1	-1	-1	-1	-1	-1	0
1	19708621	C	T	PASS	intergenic_region	MODIFIER	LOC111090616-LOC102153337	111090616-102153337	intergenic_region	111090616-102153337		-1	n.19708621C>T		-1	-1	-1	-1	-1	-1	0
1	19708737	GA	G	PASS	intergenic_region	MODIFIER	LOC111090616-LOC102153337	111090616-102153337	intergenic_region	111090616-102153337		-1	n.19708738delA		-1	-1	-1	-1	-1	-1	0
1	19709925	G	C	PASS	intergenic_region	MODIFIER	LOC111090616-LOC102153337	111090616-102153337	intergenic_region	111090616-102153337		-1	n.19709925G>C		-1	-1	-1	-1	-1	-1	0
1	19710238	G	A	PASS	intergenic_region	MODIFIER	LOC111090616-LOC102153337	111090616-102153337	intergenic_region	111090616-102153337		-1	n.19710238G>A		-1	-1	-1	-1	-1	-1	0
1	19710384	A	T	PASS	intergenic_region	MODIFIER	LOC111090616-LOC102153337	111090616-102153337	intergenic_region	111090616-102153337		-1	n.19710384A>T		-1	-1	-1	-1	-1	-1	0
1	19710527	A	C	PASS	intergenic_region	MODIFIER	LOC111090616-LOC102153337	111090616-102153337	intergenic_region	111090616-102153337		-1	n.19710527A>C		-1	-1	-1	-1	-1	-1	0
1	19710758	T	C	PASS	intergenic_region	MODIFIER	LOC111090616-LOC102153337	111090616-102153337	intergenic_region	111090616-102153337		-1	n.19710758T>C		-1	-1	-1	-1	-1	-1	0
1	19712432	C	T	PASS	intergenic_region	MODIFIER	LOC111090616-LOC102153337	111090616-102153337	intergenic_region	111090616-102153337		-1	n.19712432C>T		-1	-1	-1	-1	-1	-1	0
1	19713701	C	CT	PASS	intergenic_region	MODIFIER	LOC111090616-LOC102153337	111090616-102153337	intergenic_region	111090616-102153337		-1	n.19713701_19713702insT		-1	-1	-1	-1	-1	-1	0
1	19716384	G	A	PASS	intergenic_region	MODIFIER	LOC111090616-LOC102153337	111090616-102153337	intergenic_region	111090616-102153337		-1	n.19716384G>A		-1	-1	-1	-1	-1	-1	0
1	19717092	G	A	PASS	intergenic_region	MODIFIER	LOC111090616-LOC102153337	111090616-102153337	intergenic_region	111090616-102153337		-1	n.19717092G>A		-1	-1	-1	-1	-1	-1	0
1	19726344	C	T	PASS	intergenic_region	MODIFIER	LOC111090616-LOC102153337	111090616-102153337	intergenic_region	111090616-102153337		-1	n.19726344C>T		-1	-1	-1	-1	-1	-1	0
1	19738922	T	A	PASS	intergenic_region	MODIFIER	LOC111090616-LOC102153337	111090616-102153337	intergenic_region	111090616-102153337		-1	n.19738922T>A		-1	-1	-1	-1	-1	-1	0
1	19743381	A	C	PASS	intergenic_region	MODIFIER	LOC111090616-LOC102153337	111090616-102153337	intergenic_region	111090616-102153337		-1	n.19743381A>C		-1	-1	-1	-1	-1	-1	0
1	19747998	T	G	PASS	intergenic_region	MODIFIER	LOC111090616-LOC102153337	111090616-102153337	intergenic_region	111090616-102153337		-1	n.19747998T>G		-1	-1	-1	-1	-1	-1	0
1	19748013	A	G	PASS	intergenic_region	MODIFIER	LOC111090616-LOC102153337	111090616-102153337	intergenic_region	111090616-102153337		-1	n.19748013A>G		-1	-1	-1	-1	-1	-1	0
1	19749014	A	ATTTTTTTT	PASS	intergenic_region	MODIFIER	LOC111090616-LOC102153337	111090616-102153337	intergenic_region	111090616-102153337		-1	n.19749014_19749015insTTTTTTTT		-1	-1	-1	-1	-1	-1	0
1	19749017	A	AATTTTTTTTTTTTATTATTTATTTATGATAGTCATACAGAGAGAGAGAGAGAGGCAG	PASS	intergenic_region	MODIFIER	LOC111090616-LOC102153337	111090616-102153337	intergenic_region	111090616-102153337		-1	n.19749017_19749018insATTTTTTTTTTTTATTATTTATTTATGATAGTCATACAGAGAGAGAGAGAGAGGCAG		-1	-1	-1	-1	-1	-1	0
1	19755289	T	C	PASS	intergenic_region	MODIFIER	LOC111090616-LOC102153337	111090616-102153337	intergenic_region	111090616-102153337		-1	n.19755289T>C		-1	-1	-1	-1	-1	-1	0
1	19755502	TA	T	PASS	intergenic_region	MODIFIER	LOC111090616-LOC102153337	111090616-102153337	intergenic_region	111090616-102153337		-1	n.19755503delA		-1	-1	-1	-1	-1	-1	0
1	19755977	A	G	PASS	intergenic_region	MODIFIER	LOC111090616-LOC102153337	111090616-102153337	intergenic_region	111090616-102153337		-1	n.19755977A>G		-1	-1	-1	-1	-1	-1	0
1	19757489	C	T	PASS	intergenic_region	MODIFIER	LOC111090616-LOC102153337	111090616-102153337	intergenic_region	111090616-102153337		-1	n.19757489C>T		-1	-1	-1	-1	-1	-1	0
1	19758708	C	T	PASS	intergenic_region	MODIFIER	LOC111090616-LOC102153337	111090616-102153337	intergenic_region	111090616-102153337		-1	n.19758708C>T		-1	-1	-1	-1	-1	-1	0
1	19759849	C	T	PASS	intergenic_region	MODIFIER	LOC111090616-LOC102153337	111090616-102153337	intergenic_region	111090616-102153337		-1	n.19759849C>T		-1	-1	-1	-1	-1	-1	0
1	19762982	TA	T	PASS	intergenic_region	MODIFIER	LOC111090616-LOC102153337	111090616-102153337	intergenic_region	111090616-102153337		-1	n.19762983delA		-1	-1	-1	-1	-1	-1	0
1	19766578	T	TACAC	PASS	intergenic_region	MODIFIER	LOC111090616-LOC102153337	111090616-102153337	intergenic_region	111090616-102153337		-1	n.19766578_19766579insACAC		-1	-1	-1	-1	-1	-1	0
1	19767213	C	T	PASS	intergenic_region	MODIFIER	LOC111090616-LOC102153337	111090616-102153337	intergenic_region	111090616-102153337		-1	n.19767213C>T		-1	-1	-1	-1	-1	-1	0
1	19768584	C	T	PASS	intergenic_region	MODIFIER	LOC111090616-LOC102153337	111090616-102153337	intergenic_region	111090616-102153337		-1	n.19768584C>T		-1	-1	-1	-1	-1	-1	0
1	19768585	A	G	PASS	intergenic_region	MODIFIER	LOC111090616-LOC102153337	111090616-102153337	intergenic_region	111090616-102153337		-1	n.19768585A>G		-1	-1	-1	-1	-1	-1	0
1	19779129	T	C	PASS	intergenic_region	MODIFIER	LOC111090616-LOC102153337	111090616-102153337	intergenic_region	111090616-102153337		-1	n.19779129T>C		-1	-1	-1	-1	-1	-1	0
1	19781333	C	T	PASS	downstream_gene_variant	MODIFIER	LOC102153337	102153337	transcript	XR_291214.3	pseudogene	-1	n.*4038G>A		-1	-1	-1	-1	-1	-1	4038
1	19781333	C	T	PASS	intergenic_region	MODIFIER	LOC111090616-LOC102153337	111090616-102153337	intergenic_region	111090616-102153337		-1	n.19781333C>T		-1	-1	-1	-1	-1	-1	0
1	19781485	T	C	PASS	downstream_gene_variant	MODIFIER	LOC102153337	102153337	transcript	XR_291214.3	pseudogene	-1	n.*3886A>G		-1	-1	-1	-1	-1	-1	3886
1	19781485	T	C	PASS	intergenic_region	MODIFIER	LOC111090616-LOC102153337	111090616-102153337	intergenic_region	111090616-102153337		-1	n.19781485T>C		-1	-1	-1	-1	-1	-1	0
1	19781487	G	T	PASS	downstream_gene_variant	MODIFIER	LOC102153337	102153337	transcript	XR_291214.3	pseudogene	-1	n.*3884C>A		-1	-1	-1	-1	-1	-1	3884
1	19781487	G	T	PASS	intergenic_region	MODIFIER	LOC111090616-LOC102153337	111090616-102153337	intergenic_region	111090616-102153337		-1	n.19781487G>T		-1	-1	-1	-1	-1	-1	0
1	19782369	C	T	PASS	downstream_gene_variant	MODIFIER	LOC102153337	102153337	transcript	XR_291214.3	pseudogene	-1	n.*3002G>A		-1	-1	-1	-1	-1	-1	3002
1	19782369	C	T	PASS	intergenic_region	MODIFIER	LOC111090616-LOC102153337	111090616-102153337	intergenic_region	111090616-102153337		-1	n.19782369C>T		-1	-1	-1	-1	-1	-1	0
1	19782951	G	A	PASS	downstream_gene_variant	MODIFIER	LOC102153337	102153337	transcript	XR_291214.3	pseudogene	-1	n.*2420C>T		-1	-1	-1	-1	-1	-1	2420
1	19782951	G	A	PASS	intergenic_region	MODIFIER	LOC111090616-LOC102153337	111090616-102153337	intergenic_region	111090616-102153337		-1	n.19782951G>A		-1	-1	-1	-1	-1	-1	0
1	19783337	G	A	PASS	downstream_gene_variant	MODIFIER	LOC102153337	102153337	transcript	XR_291214.3	pseudogene	-1	n.*2034C>T		-1	-1	-1	-1	-1	-1	2034
1	19783337	G	A	PASS	intergenic_region	MODIFIER	LOC111090616-LOC102153337	111090616-102153337	intergenic_region	111090616-102153337		-1	n.19783337G>A		-1	-1	-1	-1	-1	-1	0
1	19787113	C	T	PASS	intron_variant	MODIFIER	LOC102153337	102153337	transcript	XR_291214.3	pseudogene	4	n.607+850G>A		-1	-1	-1	-1	-1	-1	0
1	19792694	C	T	PASS	intron_variant	MODIFIER	LOC102153337	102153337	transcript	XR_291214.3	pseudogene	3	n.502-4626G>A		-1	-1	-1	-1	-1	-1	0
1	19792747	G	A	PASS	intron_variant	MODIFIER	LOC102153337	102153337	transcript	XR_291214.3	pseudogene	3	n.502-4679C>T		-1	-1	-1	-1	-1	-1	0
1	19792839	T	C	PASS	intron_variant	MODIFIER	LOC102153337	102153337	transcript	XR_291214.3	pseudogene	3	n.502-4771A>G		-1	-1	-1	-1	-1	-1	0
1	19792929	C	T	PASS	intron_variant	MODIFIER	LOC102153337	102153337	transcript	XR_291214.3	pseudogene	3	n.502-4861G>A		-1	-1	-1	-1	-1	-1	0
1	19797261	A	C	PASS	intron_variant	MODIFIER	LOC102153337	102153337	transcript	XR_291214.3	pseudogene	3	n.502-9193T>G		-1	-1	-1	-1	-1	-1	0
1	19797785	A	AT	PASS	intron_variant	MODIFIER	LOC102153337	102153337	transcript	XR_291214.3	pseudogene	3	n.502-9718_502-9717insA		-1	-1	-1	-1	-1	-1	0
1	19799289	G	A	PASS	intron_variant	MODIFIER	LOC102153337	102153337	transcript	XR_291214.3	pseudogene	3	n.502-11221C>T		-1	-1	-1	-1	-1	-1	0
1	19803388	T	C	PASS	intron_variant	MODIFIER	LOC102153337	102153337	transcript	XR_291214.3	pseudogene	3	n.502-15320A>G		-1	-1	-1	-1	-1	-1	0
1	19805296	G	C	PASS	intron_variant	MODIFIER	LOC102153337	102153337	transcript	XR_291214.3	pseudogene	3	n.502-17228C>G		-1	-1	-1	-1	-1	-1	0
1	19805806	T	C	PASS	intron_variant	MODIFIER	LOC102153337	102153337	transcript	XR_291214.3	pseudogene	3	n.502-17738A>G		-1	-1	-1	-1	-1	-1	0
1	19805807	G	A	PASS	intron_variant	MODIFIER	LOC102153337	102153337	transcript	XR_291214.3	pseudogene	3	n.502-17739C>T		-1	-1	-1	-1	-1	-1	0
1	19805817	C	T	PASS	intron_variant	MODIFIER	LOC102153337	102153337	transcript	XR_291214.3	pseudogene	3	n.502-17749G>A		-1	-1	-1	-1	-1	-1	0
1	19805842	A	G	PASS	intron_variant	MODIFIER	LOC102153337	102153337	transcript	XR_291214.3	pseudogene	3	n.502-17774T>C		-1	-1	-1	-1	-1	-1	0
1	19805966	A	C	PASS	intron_variant	MODIFIER	LOC102153337	102153337	transcript	XR_291214.3	pseudogene	3	n.501+17682T>G		-1	-1	-1	-1	-1	-1	0
1	19805985	T	A	PASS	intron_variant	MODIFIER	LOC102153337	102153337	transcript	XR_291214.3	pseudogene	3	n.501+17663A>T		-1	-1	-1	-1	-1	-1	0
1	19806067	C	T	PASS	intron_variant	MODIFIER	LOC102153337	102153337	transcript	XR_291214.3	pseudogene	3	n.501+17581G>A		-1	-1	-1	-1	-1	-1	0
1	19823233	C	CT	PASS	intron_variant	MODIFIER	LOC102153337	102153337	transcript	XR_291214.3	pseudogene	3	n.501+414_501+415insA		-1	-1	-1	-1	-1	-1	0
1	19823251	C	T	PASS	intron_variant	MODIFIER	LOC102153337	102153337	transcript	XR_291214.3	pseudogene	3	n.501+397G>A		-1	-1	-1	-1	-1	-1	0
1	19823419	A	T	PASS	intron_variant	MODIFIER	LOC102153337	102153337	transcript	XR_291214.3	pseudogene	3	n.501+229T>A		-1	-1	-1	-1	-1	-1	0
1	19823420	A	T	PASS	intron_variant	MODIFIER	LOC102153337	102153337	transcript	XR_291214.3	pseudogene	3	n.501+228T>A		-1	-1	-1	-1	-1	-1	0
1	19825696	C	A	PASS	intron_variant	MODIFIER	LOC102153337	102153337	transcript	XR_291214.3	pseudogene	2	n.392-1939G>T		-1	-1	-1	-1	-1	-1	0
1	19825745	C	T	PASS	intron_variant	MODIFIER	LOC102153337	102153337	transcript	XR_291214.3	pseudogene	2	n.392-1988G>A		-1	-1	-1	-1	-1	-1	0
1	19825912	A	AAAAC	PASS	intron_variant	MODIFIER	LOC102153337	102153337	transcript	XR_291214.3	pseudogene	2	n.392-2156_392-2155insGTTT		-1	-1	-1	-1	-1	-1	0
1	19826298	T	C	PASS	intron_variant	MODIFIER	LOC102153337	102153337	transcript	XR_291214.3	pseudogene	2	n.392-2541A>G		-1	-1	-1	-1	-1	-1	0
1	19826470	G	A	PASS	intron_variant	MODIFIER	LOC102153337	102153337	transcript	XR_291214.3	pseudogene	2	n.392-2713C>T		-1	-1	-1	-1	-1	-1	0
1	19826707	T	C	PASS	intron_variant	MODIFIER	LOC102153337	102153337	transcript	XR_291214.3	pseudogene	2	n.392-2950A>G		-1	-1	-1	-1	-1	-1	0
1	19826882	AT	A	PASS	intron_variant	MODIFIER	LOC102153337	102153337	transcript	XR_291214.3	pseudogene	2	n.392-3126delA		-1	-1	-1	-1	-1	-1	0
1	19828825	C	T	PASS	intron_variant	MODIFIER	LOC102153337	102153337	transcript	XR_291214.3	pseudogene	2	n.392-5068G>A		-1	-1	-1	-1	-1	-1	0
1	19829149	A	C	PASS	intron_variant	MODIFIER	LOC102153337	102153337	transcript	XR_291214.3	pseudogene	2	n.392-5392T>G		-1	-1	-1	-1	-1	-1	0
1	19831101	T	TA	PASS	intron_variant	MODIFIER	LOC102153337	102153337	transcript	XR_291214.3	pseudogene	2	n.392-7345_392-7344insT		-1	-1	-1	-1	-1	-1	0
1	19831456	C	T	PASS	intron_variant	MODIFIER	LOC102153337	102153337	transcript	XR_291214.3	pseudogene	2	n.392-7699G>A		-1	-1	-1	-1	-1	-1	0
1	19835851	G	A	PASS	intron_variant	MODIFIER	LOC102153337	102153337	transcript	XR_291214.3	pseudogene	2	n.392-12094C>T		-1	-1	-1	-1	-1	-1	0
1	19883408	T	C	PASS	intergenic_region	MODIFIER	LOC102153337-TCF4	102153337-403949	intergenic_region	102153337-403949		-1	n.19883408T>C		-1	-1	-1	-1	-1	-1	0
1	19982365	A	G	PASS	intergenic_region	MODIFIER	LOC102153337-TCF4	102153337-403949	intergenic_region	102153337-403949		-1	n.19982365A>G		-1	-1	-1	-1	-1	-1	0
1	19987318	A	C	PASS	intergenic_region	MODIFIER	LOC102153337-TCF4	102153337-403949	intergenic_region	102153337-403949		-1	n.19987318A>C		-1	-1	-1	-1	-1	-1	0
1	19988310	C	T	PASS	intergenic_region	MODIFIER	LOC102153337-TCF4	102153337-403949	intergenic_region	102153337-403949		-1	n.19988310C>T		-1	-1	-1	-1	-1	-1	0
1	20000441	C	T	PASS	intergenic_region	MODIFIER	LOC102153337-TCF4	102153337-403949	intergenic_region	102153337-403949		-1	n.20000441C>T		-1	-1	-1	-1	-1	-1	0
1	20059450	A	C	PASS	upstream_gene_variant	MODIFIER	TCF4	403949	transcript	NM_001003268.1	protein_coding	-1	c.-6046A>C		-1	-1	-1	-1	-1	-1	1338
1	20059450	A	C	PASS	intergenic_region	MODIFIER	LOC102153337-TCF4	102153337-403949	intergenic_region	102153337-403949		-1	n.20059450A>C		-1	-1	-1	-1	-1	-1	0
1	20190194	AG	A	PASS	intron_variant	MODIFIER	TCF4	403949	transcript	NM_001003268.1	protein_coding	4	c.232+5161delG		-1	-1	-1	-1	-1	-1	0
1	20975474	C	CT	PASS	upstream_gene_variant	MODIFIER	LOC610642	610642	transcript	XM_005615675.2	protein_coding	-1	c.-3241_-3240insA		-1	-1	-1	-1	-1	-1	3241
1	20975474	C	CT	PASS	intergenic_region	MODIFIER	LOC610642-LOC111095168	610642-111095168	intergenic_region	610642-111095168		-1	n.20975474_20975475insT		-1	-1	-1	-1	-1	-1	0
1	22009985	A	AG	PASS	intron_variant	MODIFIER	DCC	483976	transcript	XM_014110275.2	protein_coding	11	c.1759-26358_1759-26357insC		-1	-1	-1	-1	-1	-1	0
1	22009985	A	AG	PASS	intron_variant	MODIFIER	DCC	483976	transcript	XM_022416893.1	protein_coding	11	c.1456-26358_1456-26357insC		-1	-1	-1	-1	-1	-1	0
1	22009985	A	AG	PASS	intron_variant	MODIFIER	DCC	483976	transcript	XM_014110301.2	protein_coding	11	c.1456-26358_1456-26357insC		-1	-1	-1	-1	-1	-1	0
1	23500513	GAAGGAAGGAAGGAAGGAAGGAAGGAAGAAAGAAAGAAAGAAAGAAAGAAAGAAAGAAAGAAAGAAAGA	G	PASS	upstream_gene_variant	MODIFIER	LOC111095203	111095203	transcript	111095203	pseudogene	-1	n.-126_-59delTCTTTCTTTCTTTCTTTCTTTCTTTCTTTCTTTCTTTCTTTCTTCCTTCCTTCCTTCCTTCCTTCCTT		-1	-1	-1	-1	-1	-1	59
1	23500513	GAAGGAAGGAAGGAAGGAAGGAAGGAAGAAAGAAAGAAAGAAAGAAAGAAAGAAAGAAAGAAAGAAAGA	G	PASS	intergenic_region	MODIFIER	LOC111095203-LOC102154698	111095203-102154698	intergenic_region	111095203-102154698		-1	n.23500514_23500581delAAGGAAGGAAGGAAGGAAGGAAGGAAGAAAGAAAGAAAGAAAGAAAGAAAGAAAGAAAGAAAGAAAGA		-1	-1	-1	-1	-1	-1	0
1	23752008	G	GCCCCCCCCCCC	PASS	intergenic_region	MODIFIER	LOC102154698-MEX3C	102154698-476195	intergenic_region	102154698-476195		-1	n.23752008_23752009insCCCCCCCCCCC		-1	-1	-1	-1	-1	-1	0
1	23929307	T	G	PASS	upstream_gene_variant	MODIFIER	SMAD4	476196	transcript	XM_022416897.1	protein_coding	-1	c.-15120A>C		-1	-1	-1	-1	-1	-1	1361
1	23929307	T	G	PASS	downstream_gene_variant	MODIFIER	ELAC1	476197	transcript	XM_022416907.1	protein_coding	-1	c.*2068A>C		-1	-1	-1	-1	-1	-1	2053
1	23929307	T	G	PASS	downstream_gene_variant	MODIFIER	ELAC1	476197	transcript	XM_022416914.1	protein_coding	-1	c.*2068A>C		-1	-1	-1	-1	-1	-1	2053
1	23929307	T	G	PASS	downstream_gene_variant	MODIFIER	ELAC1	476197	transcript	XM_022416912.1	protein_coding	-1	c.*2068A>C		-1	-1	-1	-1	-1	-1	2053
1	23929307	T	G	PASS	downstream_gene_variant	MODIFIER	ELAC1	476197	transcript	XM_022416925.1	protein_coding	-1	c.*4044A>C		-1	-1	-1	-1	-1	-1	2188
1	23929307	T	G	PASS	intron_variant	MODIFIER	SMAD4	476196	transcript	XM_022416896.1	protein_coding	1	c.-132+673A>C		-1	-1	-1	-1	-1	-1	0
1	24832775	CCGA	C	PASS	intron_variant	MODIFIER	LDLRAD4	483983	transcript	XM_005615405.3	protein_coding	2	c.-428+48805_-428+48807delTCG		-1	-1	-1	-1	-1	-1	0
1	24832775	CCGA	C	PASS	intron_variant	MODIFIER	LDLRAD4	483983	transcript	XM_022416999.1	protein_coding	2	c.-428+48805_-428+48807delTCG		-1	-1	-1	-1	-1	-1	0
1	24832775	CCGA	C	PASS	intron_variant	MODIFIER	LDLRAD4	483983	transcript	XM_022417023.1	protein_coding	2	c.-192+48805_-192+48807delTCG		-1	-1	-1	-1	-1	-1	0
1	24832775	CCGA	C	PASS	intron_variant	MODIFIER	LDLRAD4	483983	transcript	XM_022417000.1	protein_coding	2	c.-428+48805_-428+48807delTCG		-1	-1	-1	-1	-1	-1	0
1	24832775	CCGA	C	PASS	intron_variant	MODIFIER	LDLRAD4	483983	transcript	XM_005615414.3	protein_coding	2	c.-192+48805_-192+48807delTCG		-1	-1	-1	-1	-1	-1	0
1	24832775	CCGA	C	PASS	intron_variant	MODIFIER	LDLRAD4	483983	transcript	XM_005615406.3	protein_coding	2	c.-505+48805_-505+48807delTCG		-1	-1	-1	-1	-1	-1	0
1	24832775	CCGA	C	PASS	intron_variant	MODIFIER	LDLRAD4	483983	transcript	XM_022417018.1	protein_coding	2	c.-192+48805_-192+48807delTCG		-1	-1	-1	-1	-1	-1	0
1	24832775	CCGA	C	PASS	intron_variant	MODIFIER	LDLRAD4	483983	transcript	XM_005615412.3	protein_coding	2	c.-265+48805_-265+48807delTCG		-1	-1	-1	-1	-1	-1	0
1	24832775	CCGA	C	PASS	intron_variant	MODIFIER	LDLRAD4	483983	transcript	XM_005615413.3	protein_coding	2	c.-256+48805_-256+48807delTCG		-1	-1	-1	-1	-1	-1	0
1	24832779	TGGGCTGGCCCTCCTGTTAGGGACCGATGGGCTGGCCCTCCTGTTAGGGACC	T	PASS	intron_variant	MODIFIER	LDLRAD4	483983	transcript	XM_005615405.3	protein_coding	2	c.-428+48753_-428+48803delGGTCCCTAACAGGAGGGCCAGCCCATCGGTCCCTAACAGGAGGGCCAGCCC		-1	-1	-1	-1	-1	-1	0
1	24832779	TGGGCTGGCCCTCCTGTTAGGGACCGATGGGCTGGCCCTCCTGTTAGGGACC	T	PASS	intron_variant	MODIFIER	LDLRAD4	483983	transcript	XM_022416999.1	protein_coding	2	c.-428+48753_-428+48803delGGTCCCTAACAGGAGGGCCAGCCCATCGGTCCCTAACAGGAGGGCCAGCCC		-1	-1	-1	-1	-1	-1	0
1	24832779	TGGGCTGGCCCTCCTGTTAGGGACCGATGGGCTGGCCCTCCTGTTAGGGACC	T	PASS	intron_variant	MODIFIER	LDLRAD4	483983	transcript	XM_022417023.1	protein_coding	2	c.-192+48753_-192+48803delGGTCCCTAACAGGAGGGCCAGCCCATCGGTCCCTAACAGGAGGGCCAGCCC		-1	-1	-1	-1	-1	-1	0
1	24832779	TGGGCTGGCCCTCCTGTTAGGGACCGATGGGCTGGCCCTCCTGTTAGGGACC	T	PASS	intron_variant	MODIFIER	LDLRAD4	483983	transcript	XM_022417000.1	protein_coding	2	c.-428+48753_-428+48803delGGTCCCTAACAGGAGGGCCAGCCCATCGGTCCCTAACAGGAGGGCCAGCCC		-1	-1	-1	-1	-1	-1	0
1	24832779	TGGGCTGGCCCTCCTGTTAGGGACCGATGGGCTGGCCCTCCTGTTAGGGACC	T	PASS	intron_variant	MODIFIER	LDLRAD4	483983	transcript	XM_005615414.3	protein_coding	2	c.-192+48753_-192+48803delGGTCCCTAACAGGAGGGCCAGCCCATCGGTCCCTAACAGGAGGGCCAGCCC		-1	-1	-1	-1	-1	-1	0
1	24832779	TGGGCTGGCCCTCCTGTTAGGGACCGATGGGCTGGCCCTCCTGTTAGGGACC	T	PASS	intron_variant	MODIFIER	LDLRAD4	483983	transcript	XM_005615406.3	protein_coding	2	c.-505+48753_-505+48803delGGTCCCTAACAGGAGGGCCAGCCCATCGGTCCCTAACAGGAGGGCCAGCCC		-1	-1	-1	-1	-1	-1	0
1	24832779	TGGGCTGGCCCTCCTGTTAGGGACCGATGGGCTGGCCCTCCTGTTAGGGACC	T	PASS	intron_variant	MODIFIER	LDLRAD4	483983	transcript	XM_022417018.1	protein_coding	2	c.-192+48753_-192+48803delGGTCCCTAACAGGAGGGCCAGCCCATCGGTCCCTAACAGGAGGGCCAGCCC		-1	-1	-1	-1	-1	-1	0
1	24832779	TGGGCTGGCCCTCCTGTTAGGGACCGATGGGCTGGCCCTCCTGTTAGGGACC	T	PASS	intron_variant	MODIFIER	LDLRAD4	483983	transcript	XM_005615412.3	protein_coding	2	c.-265+48753_-265+48803delGGTCCCTAACAGGAGGGCCAGCCCATCGGTCCCTAACAGGAGGGCCAGCCC		-1	-1	-1	-1	-1	-1	0
1	24832779	TGGGCTGGCCCTCCTGTTAGGGACCGATGGGCTGGCCCTCCTGTTAGGGACC	T	PASS	intron_variant	MODIFIER	LDLRAD4	483983	transcript	XM_005615413.3	protein_coding	2	c.-256+48753_-256+48803delGGTCCCTAACAGGAGGGCCAGCCCATCGGTCCCTAACAGGAGGGCCAGCCC		-1	-1	-1	-1	-1	-1	0
1	25300760	T	G	PASS	intron_variant	MODIFIER	LOC102156553	102156553	transcript	XR_002625241.1	pseudogene	5	n.856+291T>G		-1	-1	-1	-1	-1	-1	0
1	25300760	T	G	PASS	intron_variant	MODIFIER	LOC102156553	102156553	transcript	XR_002625243.1	pseudogene	5	n.856+291T>G		-1	-1	-1	-1	-1	-1	0
1	25300760	T	G	PASS	intron_variant	MODIFIER	LOC102156553	102156553	transcript	XR_002625246.1	pseudogene	5	n.856+291T>G		-1	-1	-1	-1	-1	-1	0
1	25300760	T	G	PASS	intron_variant	MODIFIER	LOC102156553	102156553	transcript	XR_002625238.1	pseudogene	5	n.856+291T>G		-1	-1	-1	-1	-1	-1	0
1	25300760	T	G	PASS	intron_variant	MODIFIER	LOC102156553	102156553	transcript	XR_002625242.1	pseudogene	5	n.856+291T>G		-1	-1	-1	-1	-1	-1	0
1	25300760	T	G	PASS	intron_variant	MODIFIER	LOC102156553	102156553	transcript	XR_002625245.1	pseudogene	5	n.856+291T>G		-1	-1	-1	-1	-1	-1	0
1	25300760	T	G	PASS	intron_variant	MODIFIER	LOC102156553	102156553	transcript	XR_002625235.1	pseudogene	5	n.856+291T>G		-1	-1	-1	-1	-1	-1	0
1	25300760	T	G	PASS	intron_variant	MODIFIER	LOC102156553	102156553	transcript	XR_002625236.1	pseudogene	5	n.856+291T>G		-1	-1	-1	-1	-1	-1	0
1	25300760	T	G	PASS	intron_variant	MODIFIER	LOC102156553	102156553	transcript	XR_002625237.1	pseudogene	5	n.856+291T>G		-1	-1	-1	-1	-1	-1	0
1	25300760	T	G	PASS	intron_variant	MODIFIER	LOC102156553	102156553	transcript	XR_002625239.1	pseudogene	4	n.758-7845T>G		-1	-1	-1	-1	-1	-1	0
1	25300760	T	G	PASS	intron_variant	MODIFIER	LOC102156553	102156553	transcript	XR_002625240.1	pseudogene	5	n.856+291T>G		-1	-1	-1	-1	-1	-1	0
1	25300760	T	G	PASS	intron_variant	MODIFIER	LOC102156553	102156553	transcript	XR_002625244.1	pseudogene	5	n.856+291T>G		-1	-1	-1	-1	-1	-1	0
1	25300760	T	G	PASS	intron_variant	MODIFIER	LOC102156553	102156553	transcript	XR_002625247.1	pseudogene	5	n.1026+291T>G		-1	-1	-1	-1	-1	-1	0
1	25300765	CT	C	PASS	intron_variant	MODIFIER	LOC102156553	102156553	transcript	XR_002625241.1	pseudogene	5	n.856+297delT		-1	-1	-1	-1	-1	-1	0
1	25300765	CT	C	PASS	intron_variant	MODIFIER	LOC102156553	102156553	transcript	XR_002625243.1	pseudogene	5	n.856+297delT		-1	-1	-1	-1	-1	-1	0
1	25300765	CT	C	PASS	intron_variant	MODIFIER	LOC102156553	102156553	transcript	XR_002625246.1	pseudogene	5	n.856+297delT		-1	-1	-1	-1	-1	-1	0
1	25300765	CT	C	PASS	intron_variant	MODIFIER	LOC102156553	102156553	transcript	XR_002625238.1	pseudogene	5	n.856+297delT		-1	-1	-1	-1	-1	-1	0
1	25300765	CT	C	PASS	intron_variant	MODIFIER	LOC102156553	102156553	transcript	XR_002625242.1	pseudogene	5	n.856+297delT		-1	-1	-1	-1	-1	-1	0
1	25300765	CT	C	PASS	intron_variant	MODIFIER	LOC102156553	102156553	transcript	XR_002625245.1	pseudogene	5	n.856+297delT		-1	-1	-1	-1	-1	-1	0
1	25300765	CT	C	PASS	intron_variant	MODIFIER	LOC102156553	102156553	transcript	XR_002625235.1	pseudogene	5	n.856+297delT		-1	-1	-1	-1	-1	-1	0
1	25300765	CT	C	PASS	intron_variant	MODIFIER	LOC102156553	102156553	transcript	XR_002625236.1	pseudogene	5	n.856+297delT		-1	-1	-1	-1	-1	-1	0
1	25300765	CT	C	PASS	intron_variant	MODIFIER	LOC102156553	102156553	transcript	XR_002625237.1	pseudogene	5	n.856+297delT		-1	-1	-1	-1	-1	-1	0
1	25300765	CT	C	PASS	intron_variant	MODIFIER	LOC102156553	102156553	transcript	XR_002625239.1	pseudogene	4	n.758-7839delT		-1	-1	-1	-1	-1	-1	0
1	25300765	CT	C	PASS	intron_variant	MODIFIER	LOC102156553	102156553	transcript	XR_002625240.1	pseudogene	5	n.856+297delT		-1	-1	-1	-1	-1	-1	0
1	25300765	CT	C	PASS	intron_variant	MODIFIER	LOC102156553	102156553	transcript	XR_002625244.1	pseudogene	5	n.856+297delT		-1	-1	-1	-1	-1	-1	0
1	25300765	CT	C	PASS	intron_variant	MODIFIER	LOC102156553	102156553	transcript	XR_002625247.1	pseudogene	5	n.1026+297delT		-1	-1	-1	-1	-1	-1	0
1	25300767	G	C	PASS	intron_variant	MODIFIER	LOC102156553	102156553	transcript	XR_002625241.1	pseudogene	5	n.856+298G>C		-1	-1	-1	-1	-1	-1	0
1	25300767	G	C	PASS	intron_variant	MODIFIER	LOC102156553	102156553	transcript	XR_002625243.1	pseudogene	5	n.856+298G>C		-1	-1	-1	-1	-1	-1	0
1	25300767	G	C	PASS	intron_variant	MODIFIER	LOC102156553	102156553	transcript	XR_002625246.1	pseudogene	5	n.856+298G>C		-1	-1	-1	-1	-1	-1	0
1	25300767	G	C	PASS	intron_variant	MODIFIER	LOC102156553	102156553	transcript	XR_002625238.1	pseudogene	5	n.856+298G>C		-1	-1	-1	-1	-1	-1	0
1	25300767	G	C	PASS	intron_variant	MODIFIER	LOC102156553	102156553	transcript	XR_002625242.1	pseudogene	5	n.856+298G>C		-1	-1	-1	-1	-1	-1	0
1	25300767	G	C	PASS	intron_variant	MODIFIER	LOC102156553	102156553	transcript	XR_002625245.1	pseudogene	5	n.856+298G>C		-1	-1	-1	-1	-1	-1	0
1	25300767	G	C	PASS	intron_variant	MODIFIER	LOC102156553	102156553	transcript	XR_002625235.1	pseudogene	5	n.856+298G>C		-1	-1	-1	-1	-1	-1	0
1	25300767	G	C	PASS	intron_variant	MODIFIER	LOC102156553	102156553	transcript	XR_002625236.1	pseudogene	5	n.856+298G>C		-1	-1	-1	-1	-1	-1	0
1	25300767	G	C	PASS	intron_variant	MODIFIER	LOC102156553	102156553	transcript	XR_002625237.1	pseudogene	5	n.856+298G>C		-1	-1	-1	-1	-1	-1	0
1	25300767	G	C	PASS	intron_variant	MODIFIER	LOC102156553	102156553	transcript	XR_002625239.1	pseudogene	4	n.758-7838G>C		-1	-1	-1	-1	-1	-1	0
1	25300767	G	C	PASS	intron_variant	MODIFIER	LOC102156553	102156553	transcript	XR_002625240.1	pseudogene	5	n.856+298G>C		-1	-1	-1	-1	-1	-1	0
1	25300767	G	C	PASS	intron_variant	MODIFIER	LOC102156553	102156553	transcript	XR_002625244.1	pseudogene	5	n.856+298G>C		-1	-1	-1	-1	-1	-1	0
1	25300767	G	C	PASS	intron_variant	MODIFIER	LOC102156553	102156553	transcript	XR_002625247.1	pseudogene	5	n.1026+298G>C		-1	-1	-1	-1	-1	-1	0
1	25300779	GA	G	PASS	intron_variant	MODIFIER	LOC102156553	102156553	transcript	XR_002625241.1	pseudogene	5	n.856+311delA		-1	-1	-1	-1	-1	-1	0
1	25300779	GA	G	PASS	intron_variant	MODIFIER	LOC102156553	102156553	transcript	XR_002625243.1	pseudogene	5	n.856+311delA		-1	-1	-1	-1	-1	-1	0
1	25300779	GA	G	PASS	intron_variant	MODIFIER	LOC102156553	102156553	transcript	XR_002625246.1	pseudogene	5	n.856+311delA		-1	-1	-1	-1	-1	-1	0
[truncated: 79,519 more rows]

## Sheet: hom. high & moderate impact
Table S3. Homozygous protein-changing private variants in the sequenced Basset Hound with dystrophical epidermolysis bullosa (DEB). Private variants were obtained by filtering all variants that were present at least once in 73 control genomes. Protein-changing are variants with "high" or "moderate" impact. This resulted in 49 homozygous protein-changing private variants for the affected dog. Plea…
[truncated: 107 more rows]

[truncated: 1 more sheets: het. high & moderate impact]
